# Supplementary material for: FastViromeExplorer: a pipeline for virus and phage identification and abundance profiling in metagenomics data
Source: PeerJ. 2018 Jan 12;6:e4227. doi: 10.7717/peerj.4227 (PMC5768174; doi:10.7717/peerj.4227)
Supplement: Table S1 [file peerj-06-4227-s001.xlsx]

## Sheet: Recall
Datasets(Mutation rate)	FastViromeExplorer	ViromeScan	Blastn
3%	0.95	0.34	0.97
5%	0.87	0.33	0.91
7%	0.75	0.32	0.82
10%	0.54	0.27	0.65

## Sheet: Precision
Datasets(Mutation rate)	FastViromeExplorer	ViromeScan	Blastn
3%	0.99	0.98	0.99
5%	0.99	0.99	0.99
7%	0.99	0.99	0.99
10%	0.99	0.99	0.99

## Sheet: F1Score
Datasets(Mutation rate)	FastViromeExplorer	ViromeScan	Blastn
3%	0.97	0.51	0.98
5%	0.92	0.5	0.95
7%	0.85	0.48	0.9
10%	0.7	0.43	0.79
