# Supplementary material for: FastViromeExplorer: a pipeline for virus and phage identification and abundance profiling in metagenomics data
Source: PeerJ. 2018 Jan 12;6:e4227. doi: 10.7717/peerj.4227 (PMC5768174; doi:10.7717/peerj.4227)
Supplement: Table S2 [file peerj-06-4227-s002.xlsx]

## Sheet: 1.Donor-sample1
#IMG/VR-ID	EstimatedAbundance	Support, Co	PredictedSupport, Ce	Ratio, R
7000000695.a:SRS049900_LANL_scaffold_14438	21328	1	1	1
7000000498.a:SRS017521_Baylor_scaffold_5189	16549.8	0.979985	1	0.98
7000000690.a:SRS055982_Baylor_scaffold_15154	12525.1	0.925399	1	0.9254
7000000093.a:SRS022137_LANL_scaffold_29955	11917.1	0.999514	1	0.9995
7000000334.a:SRS015217_WUGC_scaffold_5454	10433.8	0.999943	1	0.9999
7000000317.a:SRS014459_WUGC_scaffold_11311	9539.06	0.899634	1	0.8996
7000000271.a:SRS053335_LANL_scaffold_24771	7671.27	0.772117	1	0.7721
7000000171.a:SRS052697_LANL_scaffold_25054	6898.41	0.99989	1	0.9999
3300003155.a:Ga0052270_10307189	6752	0.919323	1	0.9193
7000000333.a:SRS050925_LANL_scaffold_16337	6571.62	0.999403	1	0.9994
7000000712.a:SRS057478_LANL_scaffold_16118	6487.83	0.865212	1	0.8652
7000000297.a:SRS056259_LANL_scaffold_56134	5643.16	0.971218	1	0.9712
7000000516.a:SRS019161_WUGC_scaffold_7477	5641.97	0.403832	1	0.4038
7000000300.a:SRS043701_LANL_scaffold_4863	5594.29	0.999923	1	0.9999
7000000040.a:SRS043411_WUGC_scaffold_48710	5490	0.969127	1	0.9691
7000000628.a:SRS015782_WUGC_scaffold_14071	4283.83	0.860982	1	0.861
7000000171.a:SRS052697_LANL_scaffold_35380	4116.97	0.984242	1	0.9842
7000000434.a:SRS014287_WUGC_scaffold_21386	3928.67	0.822035	1	0.822
7000000191.a:C3074825	3798.6	0.555063	1	0.5551
7000000736.a:SRS014235_WUGC_scaffold_59350	3754.8	0.366255	0.999998	0.3663
7000000633.a:SRS015065_WUGC_scaffold_31776	3745.04	0.87107	1	0.8711
7000000460.a:SRS051031_LANL_scaffold_50865	3618.71	0.997699	1	0.9977
7000000045.a:SRS013687_Baylor_scaffold_39059	3591.38	0.999265	1	0.9993
7000000486.a:SRS015264_WUGC_scaffold_9389	3450.95	0.466339	0.999917	0.4664
7000000628.a:SRS015782_WUGC_scaffold_27732	3398	0.480812	1	0.4808
7000000669.a:SRS022713_LANL_scaffold_10683	3196.48	0.864455	1	0.8645
7000000433.a:SRS050752_LANL_scaffold_17276	3132.44	0.977422	1	0.9774
7000000045.a:SRS013687_Baylor_scaffold_5025	3083	0.920276	1	0.9203
7000000459.a:SRS012902_Baylor_scaffold_2704	3047.52	0.760695	1	0.7607
7000000333.a:SRS050925_LANL_scaffold_51739	3035.3	0.455436	1	0.4554
7000000434.a:SRS014287_WUGC_scaffold_4299	3031.72	0.761402	1	0.7614
7000000142.a:SRS016753_Baylor_scaffold_14712	2972	0.999298	1	0.9993
7000000546.a:SRS019910_WUGC_scaffold_48843	2956.46	0.908788	1	0.9088
7000000111.a:SRS019601_WUGC_scaffold_4587	2917.67	0.997753	1	0.9978
3300003140.a:Ga0051081_1002036	2667.98	0.788636	1	0.7886
7000000081.a:SRS017307_Baylor_scaffold_8553	2582	0.420155	1	0.4202
7000000334.a:SRS015217_WUGC_scaffold_31525	2573.47	0.972823	1	0.9728
7000000045.a:SRS013687_Baylor_scaffold_49789	2496.35	0.99968	1	0.9997
7000000289.a:SRS024331_LANL_scaffold_16269	2469.23	0.998667	1	0.9987
7000000444.a:SRS063985_LANL_scaffold_25380	2441.4	0.998852	1	0.9989
7000000633.a:SRS015065_WUGC_scaffold_40156	2358.05	0.606968	1	0.607
7000000171.a:SRS052697_LANL_scaffold_12111	2330.71	0.680037	0.999974	0.6801
7000000040.a:SRS043411_WUGC_scaffold_39395	2265.25	0.654747	1	0.6547
7000000040.a:SRS043411_WUGC_scaffold_7890	2232	0.419284	1	0.4193
7000000486.a:SRS015264_WUGC_scaffold_7670	2187.4	0.892823	1	0.8928
7000000334.a:SRS015217_WUGC_scaffold_4400	2100.62	0.913592	0.999982	0.9136
3300003140.a:Ga0051081_1000343	2049.44	1	1	1
7000000498.a:SRS017521_Baylor_scaffold_40051	2009.76	0.98217	1	0.9822
7000000492.a:SRS048164_WUGC_scaffold_3268	2000.78	0.999319	1	0.9993
7000000142.a:SRS016753_Baylor_scaffold_16040	1969	1	1	1
7000000036.a:SRS049164_WUGC_scaffold_46965	1906.63	0.946953	1	0.947
7000000258.a:SRS016335_WUGC_scaffold_29882	1894.39	0.871474	1	0.8715
7000000192.a:SRS017821_Baylor_scaffold_15325	1883.81	0.999235	1	0.9992
7000000538.a:SRS024075_LANL_scaffold_26	1845.73	0.324702	0.999963	0.3247
7000000633.a:SRS015065_WUGC_scaffold_42692	1842.84	0.308891	0.99819	0.3095
7000000646.a:SRS015960_WUGC_scaffold_11785	1831.81	0.999949	1	0.9999
7000000069.a:SRS016095_WUGC_scaffold_4524	1801.99	0.407079	0.999991	0.4071
3300003146.a:Ga0051080_1013286	1788.94	0.415336	0.999006	0.4157
7000000011.a:SRS053214_LANL_scaffold_7045	1781	0.724073	1	0.7241
7000000145.a:SRS050422_LANL_scaffold_38810	1750.02	0.998194	1	0.9982
7000000532.a:SRS011529_WUGC_scaffold_23832	1742.46	0.76007	1	0.7601
7000000172.a:SRS020869_Baylor_scaffold_2143	1736.12	0.990536	1	0.9905
7000000332.a:SRS015133_WUGC_scaffold_10007	1728.11	0.738276	1	0.7383
7000000231.a:SRS014613_WUGC_scaffold_5491	1715.01	0.964697	1	0.9647
3300003146.a:Ga0051080_1002265	1670.9	0.991731	1	0.9917
7000000633.a:SRS015065_WUGC_scaffold_8037	1650.69	0.998329	1	0.9983
7000000417.a:SRS011239_Baylor_scaffold_19446	1649.13	0.915239	1	0.9152
7000000516.a:SRS019161_WUGC_scaffold_23113	1636.63	0.741112	1	0.7411
7000000434.a:SRS014287_WUGC_scaffold_4213	1620	0.961107	0.99992	0.9612
7000000348.a:SRS017701_Baylor_scaffold_1906	1618.68	0.999771	1	0.9998
7000000317.a:SRS014459_WUGC_scaffold_31762	1615	0.860137	0.998932	0.8611
7000000232.a:SRS015578_WUGC_scaffold_47121	1607.99	0.653711	1	0.6537
7000000232.a:SRS015578_WUGC_scaffold_17494	1586.85	0.990511	1	0.9905
7000000370.a:SRS017191_Baylor_scaffold_18441	1581.74	0.917985	1	0.918
7000000532.a:SRS011529_WUGC_scaffold_16757	1538.71	0.951124	1	0.9511
7000000094.a:SRS024549_LANL_scaffold_5988	1538.55	0.968045	1	0.968
7000000192.a:SRS017821_Baylor_scaffold_7870	1529.96	0.998751	1	0.9988
7000000740.a:SRS064276_LANL_scaffold_20879	1504	0.62671	1	0.6267
7000000158.a:SRS014979_WUGC_scaffold_615	1489.81	0.656564	1	0.6566
7000000300.a:SRS043701_LANL_scaffold_31287	1456.75	0.985522	1	0.9855
7000000516.a:C2642171	1443	0.999259	1	0.9993
7000000515.a:SRS049995_LANL_scaffold_17190	1440.89	0.955804	1	0.9558
7000000193.a:SRS048870_WUGC_scaffold_22340	1440.7	0.834709	1	0.8347
7000000158.a:SRS014979_WUGC_scaffold_14669	1438	0.929425	1	0.9294
7000000272.a:C1593863	1432	0.822344	1	0.8223
7000000740.a:SRS064276_LANL_scaffold_33847	1420.45	1	1	1
7000000418.a:SRS012273_Baylor_scaffold_24943	1412.22	0.997675	1	0.9977
7000000429.a:C2070877	1390	0.996766	1	0.9968
7000000633.a:SRS015065_WUGC_scaffold_38818	1384	0.760172	1	0.7602
7000000735.a:SRS015190_WUGC_scaffold_21136	1377.2	0.654597	1	0.6546
7000000587.a:SRS023971_Baylor_scaffold_2586	1358.24	0.673028	0.999998	0.673
7000000296.a:SRS024009_Baylor_scaffold_5167	1346.21	0.988831	1	0.9888
7000000262.a:SRS047044_WUGC_scaffold_30230	1341.96	0.854093	1	0.8541
7000000352.a:SRS014923_WUGC_scaffold_21234	1337.86	0.915754	1	0.9158
7000000464.a:SRS077730_LANL_scaffold_11133	1331.74	0.792221	0.999645	0.7925
7000000740.a:SRS064276_LANL_scaffold_6297	1328.32	0.999578	1	0.9996
7000000609.a:SRS056519_LANL_scaffold_32781	1326.61	1	1	1
7000000460.a:SRS051031_LANL_scaffold_43781	1314.32	0.657735	0.999835	0.6578
7000000077.a:SRS064645_LANL_scaffold_4766	1301.41	0.485688	0.997904	0.4867
7000000736.a:SRS014235_WUGC_scaffold_67145	1290.59	0.694037	1	0.694
7000000538.a:SRS024075_LANL_scaffold_11531	1286.48	0.989134	1	0.9891
7000000401.a:SRS011271_WUGC_scaffold_24007	1273.31	0.445183	0.998978	0.4456
7000000093.a:SRS022137_LANL_scaffold_16775	1270.76	0.697606	0.999996	0.6976
7000000740.a:SRS064276_LANL_scaffold_34440	1263.17	1	1	1
7000000715.a:SRS014683_WUGC_scaffold_38313	1251	0.647268	0.995401	0.6503
7000000516.a:SRS019161_WUGC_scaffold_16553	1246.83	0.920549	1	0.9205
7000000178.a:SRS017247_LANL_scaffold_3057	1243.85	0.985662	1	0.9857
7000000188.a:SRS053398_LANL_scaffold_24779	1243.01	0.780379	1	0.7804
7000000158.a:SRS014979_WUGC_scaffold_7591	1229.15	0.562897	1	0.5629
7000000425.a:SRS013476_Baylor_scaffold_8090	1220.35	0.999937	1	0.9999
7000000193.a:SRS048870_WUGC_scaffold_15361	1218.62	0.354434	0.991985	0.3573
7000000546.a:SRS019910_WUGC_scaffold_2839	1197.96	0.392204	0.997612	0.3931
7000000093.a:SRS022137_LANL_scaffold_29799	1191.19	0.78398	1	0.784
7000000373.a:SRS016989_Baylor_scaffold_17381	1189.37	0.999826	1	0.9998
7000000232.a:SRS015578_WUGC_scaffold_50160	1170.58	0.470835	0.999998	0.4708
7000000112.a:SRS011302_Baylor_scaffold_8338	1164.65	0.993927	1	0.9939
7000000302.a:SRS023914_Baylor_scaffold_13777	1159.07	0.524802	0.999186	0.5252
7000000071.a:SRS065504_LANL_scaffold_42854	1147.75	0.990053	0.999999	0.9901
7000000740.a:SRS064276_LANL_scaffold_69549	1147.4	0.293461	0.958462	0.3062
7000000464.a:SRS077730_LANL_scaffold_3549	1144.48	0.770674	0.99905	0.7714
7000000317.a:C2700901	1136.41	0.990272	1	0.9903
7000000193.a:SRS048870_WUGC_scaffold_11970	1126.17	0.992404	1	0.9924
7000000112.a:SRS011302_Baylor_scaffold_24512	1119	0.507214	1	0.5072
7000000460.a:SRS051031_LANL_scaffold_38577	1109.59	0.994854	1	0.9949
7000000334.a:SRS015217_WUGC_scaffold_34308	1105.71	0.999797	1	0.9998
7000000417.a:SRS011239_Baylor_scaffold_29904	1098.51	0.950622	1	0.9506
7000000460.a:SRS051031_LANL_scaffold_33620	1096.78	0.99779	1	0.9978
7000000011.a:SRS053214_LANL_scaffold_8387	1084.27	0.30465	0.999991	0.3047
7000000417.a:SRS011239_Baylor_scaffold_29301	1076	0.331938	1	0.3319
7000000011.a:SRS053214_LANL_scaffold_15526	1071.1	0.77402	0.999746	0.7742
7000000032.a:SRS024132_Baylor_scaffold_33940	1067.03	0.712969	1	0.713
7000000077.a:SRS064645_LANL_scaffold_1559	1063.99	0.90727	0.999999	0.9073
7000000735.a:SRS015190_WUGC_scaffold_19745	1060.19	0.908207	1	0.9082
7000000736.a:SRS014235_WUGC_scaffold_49626	1060	0.932105	0.999875	0.9322
7000000093.a:SRS022137_LANL_scaffold_5967	1015.98	0.984481	1	0.9845
3300003146.a:Ga0051080_1011628	994.532	0.582858	0.992125	0.5875
7000000032.a:SRS024132_Baylor_scaffold_21369	993	0.336647	0.99834	0.3372
7000000740.a:SRS064276_LANL_scaffold_5388	991.078	0.435434	0.996976	0.4368
7000000075.a:SRS016056_WUGC_scaffold_510	967.179	0.420452	0.999512	0.4207
7000000011.a:SRS053214_LANL_scaffold_25652	957.188	0.50233	0.999923	0.5024
3300003146.a:Ga0051080_1013285	953.083	0.414819	0.999371	0.4151
7000000107.a:SRS042628_WUGC_scaffold_19969	952.294	0.993473	1	0.9935
7000000385.a:SRS017433_Baylor_scaffold_16143	943.439	0.756685	1	0.7567
7000000077.a:SRS064645_LANL_scaffold_5740	931.816	0.811105	1	0.8111
7000000646.a:SRS015960_WUGC_scaffold_3189	931.541	0.983427	1	0.9834
3300003146.a:Ga0051080_1007824	929.719	0.613974	0.999983	0.614
7000000172.a:SRS020869_Baylor_scaffold_9018	924.201	0.831066	1	0.8311
7000000300.a:SRS043701_LANL_scaffold_26644	888.363	0.974797	1	0.9748
7000000492.a:SRS048164_WUGC_scaffold_24100	887.972	0.975978	1	0.976
7000000077.a:SRS064645_LANL_scaffold_3244	880.917	0.818251	0.999998	0.8183
7000000549.a:SRS013521_LANL_scaffold_12643	876.779	0.891924	1	0.8919
7000000370.a:SRS017191_Baylor_scaffold_25785	875.78	0.609301	1	0.6093
7000000077.a:SRS064645_LANL_scaffold_295	863.523	0.783453	0.999974	0.7835
7000000335.a:SRS015369_Baylor_scaffold_3634	859.568	0.640529	0.999987	0.6405
7000000186.a:SRS022524_Baylor_scaffold_44229	846.687	0.993203	1	0.9932
7000000098.a:SRS023176_Baylor_scaffold_4581	846.584	0.442588	0.999447	0.4428
7000000630.a:SRS062427_LANL_scaffold_3363	845.604	0.586396	0.998003	0.5876
7000000192.a:C2499098	842.345	0.997861	1	0.9979
7000000296.a:SRS024009_Baylor_scaffold_72	827.759	0.89881	0.999763	0.899
7000000633.a:SRS015065_WUGC_scaffold_40560	822	0.720346	1	0.7203
7000000297.a:SRS056259_LANL_scaffold_26902	810.632	0.855135	0.999984	0.8551
7000000492.a:SRS048164_WUGC_scaffold_15247	809.86	0.8042	1	0.8042
7000000107.a:SRS042628_WUGC_scaffold_11024	788.136	0.461958	0.999884	0.462
7000000418.a:SRS012273_Baylor_scaffold_35970	785	0.312986	0.989095	0.3164
7000000417.a:SRS011239_Baylor_scaffold_25490	782.513	0.860627	1	0.8606
7000000538.a:SRS024075_LANL_scaffold_17053	781	0.924318	0.999966	0.9243
7000000380.a:SRS015663_WUGC_scaffold_33235	770.45	0.829748	0.999491	0.8302
7000000516.a:SRS019161_WUGC_scaffold_9943	768.082	0.99986	1	0.9999
7000000271.a:SRS053335_LANL_scaffold_31241	767.391	0.360868	0.999999	0.3609
7000000498.a:SRS017521_Baylor_scaffold_15938	750.592	0.39197	0.969147	0.4044
7000000186.a:SRS022524_Baylor_scaffold_22974	749.543	0.79233	0.999927	0.7924
7000000200.a:SRS023526_Baylor_scaffold_6468	740.171	0.346342	0.999015	0.3467
7000000352.a:SRS014923_WUGC_scaffold_28200	732.822	0.714868	0.994877	0.7185
7000000587.a:SRS023971_Baylor_scaffold_4655	730.639	0.56763	0.999973	0.5676
7000000332.a:SRS015133_WUGC_scaffold_39195	728.799	0.495767	0.999997	0.4958
7000000232.a:SRS015578_WUGC_scaffold_37647	727.698	0.80339	0.995589	0.8069
7000000464.a:SRS077730_LANL_scaffold_1401	715.638	0.706994	0.999996	0.707
7000000433.a:SRS050752_LANL_scaffold_36687	714.637	0.841007	1	0.841
7000000380.a:SRS015663_WUGC_scaffold_187	709.048	0.995097	1	0.9951
7000000171.a:SRS052697_LANL_scaffold_44596	708.408	0.655341	0.982597	0.6669
7000000142.a:SRS016753_Baylor_scaffold_22	708	0.689108	1	0.6891
7000000433.a:SRS050752_LANL_scaffold_4992	706.293	0.467709	0.909828	0.5141
7000000695.a:SRS049900_LANL_scaffold_302	701	0.639166	0.952861	0.6708
7000000736.a:SRS014235_WUGC_scaffold_50587	695.637	0.883155	1	0.8832
7000000570.a:SRS051882_Baylor_scaffold_15608	692.748	0.997758	1	0.9978
7000000370.a:SRS017191_Baylor_scaffold_21193	691.441	0.933898	1	0.9339
7000000040.a:SRS043411_WUGC_scaffold_38934	685.498	0.389268	1	0.3893
7000000188.a:SRS053398_LANL_scaffold_19918	685.367	0.767585	1	0.7676
7000000538.a:SRS024075_LANL_scaffold_15318	684.927	0.999047	1	0.999
7000000332.a:SRS015133_WUGC_scaffold_29132	675.999	0.829192	1	0.8292
3300003146.a:Ga0051080_1003158	673.841	0.519801	0.999996	0.5198
7000000045.a:SRS013687_Baylor_scaffold_59596	672.957	0.998895	1	0.9989
7000000300.a:SRS043701_LANL_scaffold_6919	672.65	0.998818	1	0.9988
7000000317.a:SRS014459_WUGC_scaffold_30712	672.343	0.472925	0.98728	0.479
7000000641.a:SRS018351_Baylor_scaffold_21250	667.968	0.546511	1	0.5465
7000000521.a:SRS023583_Baylor_scaffold_7990	663.831	0.348052	0.997783	0.3488
7000000531.a:SRS049959_WUGC_scaffold_8601	660	0.465612	0.99993	0.4656
7000000417.a:SRS011239_Baylor_scaffold_5769	658.606	0.955742	1	0.9557
7000000111.a:SRS019601_WUGC_scaffold_34018	656.757	0.864539	1	0.8645
7000000624.a:SRS024435_LANL_scaffold_33266	655.772	0.74804	0.999999	0.748
7000000006.a:SRS054956_LANL_scaffold_45036	652.059	0.628007	0.999262	0.6285
7000000433.a:SRS050752_LANL_scaffold_13058	647.856	0.895664	0.999955	0.8957
7000000069.a:SRS016095_WUGC_scaffold_499	638.837	0.327569	0.991967	0.3302
7000000112.a:SRS011302_Baylor_scaffold_21779	636.516	0.676332	0.99999	0.6763
7000000172.a:SRS020869_Baylor_scaffold_8026	631.957	0.998854	1	0.9989
7000000308.a:SRS058770_LANL_scaffold_31095	629.876	0.825388	0.999643	0.8257
7000000258.a:SRS016335_WUGC_scaffold_45281	627.936	0.40566	0.999181	0.406
7000000296.a:SRS024009_Baylor_scaffold_2001	625.858	0.830746	0.999615	0.8311
7000000158.a:SRS014979_WUGC_scaffold_36459	618.564	0.519647	0.999732	0.5198
7000000308.a:SRS058770_LANL_scaffold_2124	618	0.404758	0.999143	0.4051
7000000111.a:SRS019601_WUGC_scaffold_45411	618	0.932814	1	0.9328
7000000181.a:SRS018656_WUGC_scaffold_1360	613.262	0.993046	1	0.993
7000000460.a:SRS051031_LANL_scaffold_14138	607.618	0.625873	0.984905	0.6355
7000000289.a:SRS024331_LANL_scaffold_48631	607.122	0.672614	0.999992	0.6726
7000000526.a:SRS019397_WUGC_scaffold_28077	604.597	0.458361	0.911317	0.503
3300003146.a:Ga0051080_1006856	603.459	0.883454	0.999471	0.8839
7000000317.a:SRS014459_WUGC_scaffold_19157	602.173	0.963465	0.999968	0.9635
7000000186.a:SRS022524_Baylor_scaffold_4999	597.936	0.647201	0.999991	0.6472
3300003140.a:Ga0051081_1009322	593.902	0.836721	0.998144	0.8383
7000000609.a:SRS056519_LANL_scaffold_24833	593.421	0.750019	1	0.75
7000000715.a:SRS014683_WUGC_scaffold_10823	593.2	0.582035	0.999879	0.5821
7000000071.a:SRS065504_LANL_scaffold_28056	581	0.453208	0.940408	0.4819
7000000093.a:SRS022137_LANL_scaffold_648	580.055	0.838715	1	0.8387
7000000695.a:SRS049900_LANL_scaffold_18790	572.833	0.85681	1	0.8568
7000000460.a:SRS051031_LANL_scaffold_72468	568.608	0.812684	1	0.8127
7000000045.a:SRS013687_Baylor_scaffold_49129	566.479	0.895843	1	0.8958
7000000171.a:SRS052697_LANL_scaffold_15567	564	0.833739	0.99576	0.8373
7000000239.a:SRS013951_WUGC_scaffold_6620	560	0.852632	0.999877	0.8527
3300003146.a:Ga0051080_1010211	559.411	0.654283	0.989377	0.6613
7000000158.a:SRS014979_WUGC_scaffold_10649	557.919	0.999812	1	0.9998
7000000712.a:SRS057478_LANL_scaffold_23604	557.714	0.412889	0.963552	0.4285
7000000320.a:SRS063040_Baylor_scaffold_54287	557.628	0.996892	1	0.9969
7000000334.a:SRS015217_WUGC_scaffold_5606	556.965	0.294333	0.948208	0.3104
7000000538.a:SRS024075_LANL_scaffold_18687	554.618	0.663791	0.999999	0.6638
7000000045.a:SRS013687_Baylor_scaffold_5170	551.629	0.650301	0.999462	0.6507
7000000624.a:SRS024435_LANL_scaffold_32816	549.463	0.977782	1	0.9778
7000000131.a:SRS057717_LANL_scaffold_11726	549.457	0.945004	1	0.945
7000000735.a:SRS015190_WUGC_scaffold_29555	548.458	0.336766	0.995616	0.3382
7000000624.a:SRS024435_LANL_scaffold_33663	548	0.943279	0.999994	0.9433
7000000232.a:SRS015578_WUGC_scaffold_31076	547.621	0.432536	0.999972	0.4325
7000000460.a:SRS051031_LANL_scaffold_4812	544.96	0.997378	1	0.9974
7000000661.a:SRS052027_LANL_scaffold_18245	541.753	0.327091	0.956617	0.3419
7000000490.a:SRS013800_Baylor_scaffold_14545	541.506	0.999587	1	0.9996
7000000633.a:SRS015065_WUGC_scaffold_20166	539.861	0.99983	1	0.9998
7000000186.a:SRS022524_Baylor_scaffold_18091	534	0.570537	0.993485	0.5743
7000000646.a:SRS015960_WUGC_scaffold_30800	531.46	0.675286	0.999998	0.6753
7000000171.a:SRS052697_LANL_scaffold_31029	531.119	0.459572	0.959936	0.4788
7000000112.a:C3417653	530.919	0.999824	0.999999	0.9998
7000000740.a:SRS064276_LANL_scaffold_45740	529.64	0.970707	1	0.9707
7000000429.a:C2072231	529	0.518829	0.995886	0.521
7000000171.a:SRS052697_LANL_scaffold_14420	528.447	0.589732	0.938895	0.6281
7000000111.a:SRS019601_WUGC_scaffold_14923	525.614	0.952174	1	0.9522
7000000107.a:SRS042628_WUGC_scaffold_3180	524	0.976673	1	0.9767
7000000397.a:SRS011586_WUGC_scaffold_33288	522	0.704518	0.999886	0.7046
7000000531.a:SRS049959_WUGC_scaffold_30759	521.711	0.616751	0.981502	0.6284
7000000232.a:SRS015578_WUGC_scaffold_51358	520	0.927689	0.99974	0.9279
7000000302.a:SRS023914_Baylor_scaffold_5263	516	0.708326	0.948318	0.7469
7000000352.a:SRS014923_WUGC_scaffold_59198	514.336	0.98581	0.999997	0.9858
7000000659.a:SRS015854_WUGC_scaffold_17917	512.03	0.99979	1	0.9998
7000000317.a:SRS014459_WUGC_scaffold_24841	507.667	0.771463	0.999999	0.7715
7000000006.a:SRS054956_LANL_scaffold_12498	507.209	0.801259	0.976887	0.8202
7000000684.a:SRS019582_WUGC_scaffold_85806	504.107	0.953629	1	0.9536
7000000418.a:SRS012273_Baylor_scaffold_968	499.977	0.761567	0.992474	0.7673
7000000609.a:SRS056519_LANL_scaffold_2340	495.843	0.814516	1	0.8145
7000000661.a:SRS052027_LANL_scaffold_16529	495.557	0.624789	0.928309	0.673
7000000171.a:SRS052697_LANL_scaffold_53090	494.802	0.54258	0.996561	0.5445
7000000526.a:SRS019397_WUGC_scaffold_19451	494.783	0.994598	1	0.9946
7000000289.a:SRS024331_LANL_scaffold_41417	493.259	0.524681	0.963897	0.5443
7000000193.a:SRS048870_WUGC_scaffold_23736	492.475	0.878118	0.999999	0.8781
7000000407.a:C3633842	490.086	0.821998	0.999995	0.822
7000000509.a:SRS054590_LANL_scaffold_9148	487.071	0.742538	0.999792	0.7427
7000000736.a:SRS014235_WUGC_scaffold_70343	486	0.996313	1	0.9963
7000000434.a:SRS014287_WUGC_scaffold_38549	485	0.936306	0.999999	0.9363
7000000158.a:SRS014979_WUGC_scaffold_29059	484	1	1	1
7000000081.a:SRS017307_Baylor_scaffold_7371	483.187	0.404201	0.971309	0.4161
7000000308.a:SRS058770_LANL_scaffold_32137	482.633	0.822962	0.997852	0.8247
7000000193.a:SRS048870_WUGC_scaffold_50367	478.952	0.708159	1	0.7082
7000000628.a:SRS015782_WUGC_scaffold_3641	478	0.936212	0.999999	0.9362
7000000684.a:SRS019582_WUGC_scaffold_22380	476.21	0.828361	1	0.8284
7000000022.a:SRS011452_WUGC_scaffold_1815	474.906	0.982819	1	0.9828
7000000515.a:SRS049995_LANL_scaffold_1391	473.962	0.480563	0.92848	0.5176
7000000213.a:SRS011405_WUGC_scaffold_26546	473.909	0.311916	0.997454	0.3127
7000000081.a:SRS017307_Baylor_scaffold_6106	472.166	0.964369	0.999664	0.9647
7000000077.a:SRS064645_LANL_scaffold_2386	470.653	0.305514	0.989797	0.3087
7000000011.a:SRS053214_LANL_scaffold_10149	469.958	0.496708	0.986332	0.5036
7000000628.a:SRS015782_WUGC_scaffold_1599	468.359	0.440142	0.999942	0.4402
7000000083.a:C15593027	467.235	0.85788	1	0.8579
7000000045.a:SRS013687_Baylor_scaffold_19069	466.066	0.372694	0.949684	0.3924
7000000333.a:SRS050925_LANL_scaffold_5503	465.818	0.392114	0.925737	0.4236
7000000352.a:SRS014923_WUGC_scaffold_8559	463.862	0.487342	0.98837	0.4931
7000000626.a:C1917078	450	0.914919	1	0.9149
7000000320.a:SRS063040_Baylor_scaffold_39114	449	0.32091	0.948513	0.3383
7000000492.a:SRS048164_WUGC_scaffold_6049	435.934	0.565554	0.967533	0.5845
7000000538.a:SRS024075_LANL_scaffold_11346	435.474	0.977595	1	0.9776
7000000243.a:C4025582	435.335	0.979435	1	0.9794
7000000582.a:SRS019787_WUGC_scaffold_25417	434.606	0.957006	1	0.957
7000000045.a:SRS013687_Baylor_scaffold_35231	433.596	0.989883	1	0.9899
7000000232.a:SRS015578_WUGC_scaffold_296	429.992	0.373237	0.957856	0.3897
7000000045.a:SRS013687_Baylor_scaffold_16426	429.686	0.488364	0.99995	0.4884
7000000628.a:C3502443	427.92	0.928935	1	0.9289
7000000239.a:SRS013951_WUGC_scaffold_47254	426.735	0.999322	1	0.9993
7000000712.a:SRS057478_LANL_scaffold_27036	425.234	0.915213	0.9999	0.9153
7000000308.a:SRS058770_LANL_scaffold_6219	424.228	0.457541	0.953731	0.4797
7000000735.a:SRS015190_WUGC_scaffold_22815	417.399	0.520587	0.999997	0.5206
7000000516.a:SRS019161_WUGC_scaffold_30524	416.046	0.794307	0.999213	0.7949
7000000158.a:SRS014979_WUGC_scaffold_36395	414	0.511317	0.999403	0.5116
7000000186.a:SRS022524_Baylor_scaffold_63692	413.664	0.840702	1	0.8407
7000000434.a:SRS014287_WUGC_scaffold_11775	407.789	0.64949	0.990562	0.6557
7000000444.a:SRS063985_LANL_scaffold_7386	407.232	0.382027	0.999682	0.3821
7000000289.a:SRS024331_LANL_scaffold_47838	405.986	0.396694	0.977001	0.406
7000000481.a:SRS047014_WUGC_scaffold_78473	405	0.826479	0.999976	0.8265
7000000498.a:SRS017521_Baylor_scaffold_21475	402.219	0.972374	1	0.9724
7000000464.a:SRS077730_LANL_scaffold_14893	399.434	0.783848	0.993574	0.7889
7000000320.a:SRS063040_Baylor_scaffold_57179	398.818	0.983925	1	0.9839
7000000736.a:SRS014235_WUGC_scaffold_18964	397.779	0.431859	0.999986	0.4319
7000000069.a:SRS016095_WUGC_scaffold_21527	397.653	0.634364	1	0.6344
7000000630.a:SRS062427_LANL_scaffold_16053	394	0.309257	0.999996	0.3093
7000000142.a:SRS016753_Baylor_scaffold_13798	391.813	0.983768	0.999885	0.9839
7000000122.a:SRS042284_WUGC_scaffold_9524	387.408	0.649081	1	0.6491
7000000231.a:SRS014613_WUGC_scaffold_29584	385.959	0.771813	0.993868	0.7766
7000000481.a:SRS047014_WUGC_scaffold_65733	385.605	0.949417	1	0.9494
7000000740.a:SRS064276_LANL_scaffold_8498	384	0.296522	0.9716	0.3052
7000000077.a:C470392	383	0.967302	0.999988	0.9673
7000000045.a:SRS013687_Baylor_scaffold_48342	382.527	0.998615	1	0.9986
7000000370.a:SRS017191_Baylor_scaffold_21968	380.823	0.835153	0.999728	0.8354
7000000112.a:C3418093	380.103	0.457648	0.995316	0.4598
7000000492.a:SRS048164_WUGC_scaffold_32442	379.453	0.753073	0.997484	0.755
7000000532.a:SRS011529_WUGC_scaffold_9616	376.907	0.524745	0.999658	0.5249
7000000684.a:SRS019582_WUGC_scaffold_25599	375	0.369457	0.850691	0.4343
7000000609.a:SRS056519_LANL_scaffold_11960	373.93	0.872526	0.993823	0.8779
7000000192.a:C2494522	373.392	1	1	1
7000000684.a:SRS019582_WUGC_scaffold_51542	371.785	0.549399	0.991307	0.5542
7000000232.a:SRS015578_WUGC_scaffold_13475	371.233	0.444646	0.950558	0.4678
7000000736.a:SRS014235_WUGC_scaffold_72893	367.707	0.899751	0.998826	0.9008
7000000516.a:SRS019161_WUGC_scaffold_66992	367.148	0.750871	0.993954	0.7554
7000000011.a:SRS053214_LANL_scaffold_1564	366	0.42334	0.999102	0.4237
7000000193.a:SRS048870_WUGC_scaffold_19106	365.017	0.431789	0.981807	0.4398
7000000172.a:SRS020869_Baylor_scaffold_17752	363	0.949641	0.999821	0.9498
7000000300.a:SRS043701_LANL_scaffold_19429	363	0.335358	0.930136	0.3605
7000000306.a:SRS043001_WUGC_scaffold_44707	361	0.992047	1	0.992
7000000646.a:SRS015960_WUGC_scaffold_16943	360	0.521654	0.997794	0.5228
7000000661.a:SRS052027_LANL_scaffold_16499	359.45	0.580934	0.996955	0.5827
7000000441.a:SRS015794_Baylor_scaffold_1280	359.388	0.862918	0.999712	0.8632
7000000071.a:SRS065504_LANL_scaffold_57925	358	0.432805	0.991473	0.4365
7000000429.a:C2070823	357.218	0.588871	0.999952	0.5889
7000000370.a:SRS017191_Baylor_scaffold_25985	357.128	0.973406	1	0.9734
7000000646.a:C1934882	357	0.521718	0.999993	0.5217
7000000633.a:SRS015065_WUGC_scaffold_13433	356.919	0.893451	1	0.8935
7000000380.a:SRS015663_WUGC_scaffold_31145	355.01	0.90701	0.999949	0.9071
7000000385.a:SRS017433_Baylor_scaffold_19995	354.896	0.993696	1	0.9937
7000000075.a:C1203267	353	0.761586	0.999979	0.7616
7000000646.a:SRS015960_WUGC_scaffold_32038	350.547	0.829266	1	0.8293
7000000715.a:SRS014683_WUGC_scaffold_51421	350.07	0.981172	0.999838	0.9813
7000000069.a:SRS016095_WUGC_scaffold_17282	348.768	0.790803	0.980592	0.8065
7000000418.a:SRS012273_Baylor_scaffold_38856	348.039	0.993654	1	0.9937
7000000218.a:C3076292	347.689	0.391974	0.9819	0.3992
7000000444.a:SRS063985_LANL_scaffold_14384	346.069	0.84065	1	0.8406
7000000410.a:SRS019030_Baylor_scaffold_32715	345	0.383952	0.976177	0.3933
7000000081.a:SRS017307_Baylor_scaffold_25643	343.712	0.367881	0.984263	0.3738
7000000735.a:SRS015190_WUGC_scaffold_25958	341.769	0.744091	0.9922	0.7499
7000000736.a:SRS014235_WUGC_scaffold_64998	341.637	0.331023	0.891825	0.3712
7000000317.a:C2701553	340.272	0.942503	1	0.9425
7000000515.a:SRS049995_LANL_scaffold_40969	340	0.855517	0.991494	0.8629
7000000252.a:C2209446	339.762	0.851748	0.985213	0.8645
7000000192.a:C2499635	334.576	0.47575	0.999658	0.4759
7000000071.a:C3429831	330.898	0.733872	1	0.7339
7000000627.a:SRS014313_WUGC_scaffold_508	329.562	0.999714	1	0.9997
7000000624.a:SRS024435_LANL_scaffold_18853	327.911	0.223373	0.578303	0.3863
7000000308.a:SRS058770_LANL_scaffold_29582	327.891	0.27709	0.772554	0.3587
7000000627.a:SRS014313_WUGC_scaffold_5153	327.445	0.976134	1	0.9761
7000000380.a:SRS015663_WUGC_scaffold_9299	327.348	0.596571	0.907778	0.6572
7000000521.a:SRS023583_Baylor_scaffold_11082	327	0.327541	0.999935	0.3276
7000000633.a:SRS015065_WUGC_scaffold_2847	324.018	0.572597	0.963957	0.594
7000000370.a:SRS017191_Baylor_scaffold_23359	323.308	0.941475	1	0.9415
7000000646.a:SRS015960_WUGC_scaffold_14975	322.838	0.426298	0.969896	0.4395
7000000308.a:SRS058770_LANL_scaffold_38398	322.145	0.330524	0.995794	0.3319
7000000040.a:SRS043411_WUGC_scaffold_15815	322	0.994312	0.999994	0.9943
7000000122.a:C1755092	321.404	0.957752	1	0.9578
7000000296.a:SRS024009_Baylor_scaffold_15752	321.088	0.343422	0.999619	0.3436
7000000460.a:SRS051031_LANL_scaffold_41318	320.914	0.645154	0.995336	0.6482
7000000373.a:SRS016989_Baylor_scaffold_12709	318.698	0.979712	1	0.9797
7000000373.a:SRS016989_Baylor_scaffold_5882	318.63	0.995998	1	0.996
7000000498.a:SRS017521_Baylor_scaffold_3364	315.763	0.43645	0.768141	0.5682
7000000492.a:SRS048164_WUGC_scaffold_2302	314.668	0.562384	0.992299	0.5667
7000000040.a:SRS043411_WUGC_scaffold_21308	314.109	0.288546	0.799887	0.3607
7000000526.a:SRS019397_WUGC_scaffold_26943	309.434	0.413282	0.956573	0.432
3300003140.a:Ga0051081_1006770	309.199	0.63832	0.999199	0.6388
7000000641.a:C2814179	308	0.609015	0.999487	0.6093
3300003146.a:Ga0051080_1011624	307	0.739558	0.997908	0.7411
7000000111.a:SRS019601_WUGC_scaffold_48658	306.426	0.80965	0.976643	0.829
7000000515.a:SRS049995_LANL_scaffold_20086	305.741	0.977243	1	0.9772
7000000032.a:SRS024132_Baylor_scaffold_8274	303.887	0.480674	0.999554	0.4809
7000000308.a:SRS058770_LANL_scaffold_26875	302.774	0.519362	0.962306	0.5397
7000000630.a:SRS062427_LANL_scaffold_15837	302.753	0.576755	0.999998	0.5768
7000000516.a:SRS019161_WUGC_scaffold_10156	302.059	0.397913	0.977577	0.407
7000000401.a:SRS011271_WUGC_scaffold_27850	301.179	0.414722	0.967972	0.4284
7000000184.a:SRS016954_Baylor_scaffold_3876	299.574	0.689283	0.999992	0.6893
7000000112.a:SRS011302_Baylor_scaffold_10368	299.426	0.619172	0.991553	0.6244
7000000546.a:SRS019910_WUGC_scaffold_48242	298.427	0.484774	0.99914	0.4852
7000000684.a:SRS019582_WUGC_scaffold_74917	296.63	0.506369	0.977893	0.5178
7000000022.a:SRS011452_WUGC_scaffold_8852	296.426	0.983967	1	0.984
7000000690.a:SRS055982_Baylor_scaffold_7629	295.513	0.999629	1	0.9996
7000000417.a:SRS011239_Baylor_scaffold_14910	291.153	0.615312	0.97768	0.6294
7000000370.a:SRS017191_Baylor_scaffold_3408	290.58	0.436832	0.999913	0.4369
7000000401.a:C3194327	289	0.792747	0.998992	0.7935
7000000112.a:SRS011302_Baylor_scaffold_18536	288.301	0.90487	0.999961	0.9049
7000000546.a:SRS019910_WUGC_scaffold_60090	287.822	0.247963	0.804131	0.3084
7000000111.a:SRS019601_WUGC_scaffold_14661	287.134	0.935954	0.999991	0.936
7000000145.a:SRS050422_LANL_scaffold_56839	286.959	0.316174	0.870023	0.3634
7000000296.a:C1830350	285.638	0.357219	0.998854	0.3576
7000000385.a:C1841523	285	0.984882	0.999858	0.985
7000000626.a:SRS064557_LANL_scaffold_4030	284.245	0.998099	1	0.9981
7000000094.a:SRS024549_LANL_scaffold_11251	283.691	0.593581	0.999534	0.5939
7000000022.a:SRS011452_WUGC_scaffold_912	283.424	0.746967	1	0.747
7000000418.a:SRS012273_Baylor_scaffold_1923	277.063	0.538913	0.999993	0.5389
7000000112.a:SRS011302_Baylor_scaffold_20697	276.601	0.636897	0.994901	0.6402
7000000736.a:SRS014235_WUGC_scaffold_4960	275.54	0.358255	0.925476	0.3871
7000000736.a:SRS014235_WUGC_scaffold_11916	274.059	0.429217	0.998884	0.4297
7000000740.a:SRS064276_LANL_scaffold_53752	271.536	0.505879	0.830197	0.6093
7000000628.a:SRS015782_WUGC_scaffold_4605	271.532	0.999265	1	0.9993
7000000213.a:SRS011405_WUGC_scaffold_13873	271.056	0.724791	0.989907	0.7322
7000000429.a:C2072421	270.331	0.759322	0.999998	0.7593
7000000093.a:SRS022137_LANL_scaffold_3435	269.054	0.99916	1	0.9992
7000000232.a:SRS015578_WUGC_scaffold_38693	268.673	0.369855	0.846193	0.4371
7000000475.a:SRS020328_Baylor_scaffold_33236	266.75	0.668582	0.978774	0.6831
7000000296.a:C1830652	266	0.722476	0.955556	0.7561
7000000407.a:C3633634	265.914	0.781043	0.999775	0.7812
7000000181.a:SRS018656_WUGC_scaffold_14050	263.371	0.568357	0.988522	0.575
7000000628.a:SRS015782_WUGC_scaffold_39917	260.217	0.451403	0.89913	0.502
7000000334.a:SRS015217_WUGC_scaffold_38815	260.159	0.964167	0.999885	0.9643
7000000186.a:SRS022524_Baylor_scaffold_76131	260.028	0.297651	0.871756	0.3414
3300003146.a:Ga0051080_1019687	259	0.833333	0.983206	0.8476
7000000690.a:SRS055982_Baylor_scaffold_3508	258.393	0.258384	0.8477	0.3048
7000000045.a:SRS013687_Baylor_scaffold_20818	258.303	0.982669	1	0.9827
7000000403.a:SRS024388_LANL_scaffold_11717	256.601	0.967649	1	0.9676
7000000532.a:SRS011529_WUGC_scaffold_31780	256.452	0.999572	1	0.9996
7000000332.a:SRS015133_WUGC_scaffold_30031	256	0.296796	0.95902	0.3095
7000000460.a:SRS051031_LANL_scaffold_67044	254.288	0.568649	0.999979	0.5687
7000000418.a:C3792130	254	0.998848	0.999998	0.9988
7000000486.a:SRS015264_WUGC_scaffold_56561	253.938	0.426238	0.999661	0.4264
7000000410.a:SRS019030_Baylor_scaffold_21696	252.971	0.389512	0.990687	0.3932
7000000633.a:C2488216	251.781	0.700647	0.964006	0.7268
7000000272.a:SRS016203_WUGC_scaffold_8984	250.032	0.818738	0.98225	0.8335
7000000093.a:SRS022137_LANL_scaffold_26554	249.993	0.282668	0.938315	0.3013
7000000333.a:SRS050925_LANL_scaffold_43871	249.909	0.415766	0.779741	0.5332
7000000735.a:SRS015190_WUGC_scaffold_19561	249	0.406204	0.994093	0.4086
7000000433.a:SRS050752_LANL_scaffold_3157	248.597	0.308864	0.868418	0.3557
7000000531.a:SRS049959_WUGC_scaffold_24355	248	0.956637	0.998547	0.958
7000000131.a:SRS057717_LANL_scaffold_11165	246.117	0.863212	0.999997	0.8632
7000000559.a:SRS058723_Baylor_scaffold_12543	246.05	0.685239	0.999836	0.6854
7000000334.a:SRS015217_WUGC_scaffold_14064	245.756	0.911277	0.999889	0.9114
7000000401.a:SRS011271_WUGC_scaffold_17213	244.691	0.442025	1	0.442
7000000317.a:SRS014459_WUGC_scaffold_77787	243.079	0.961321	1	0.9613
7000000297.a:SRS056259_LANL_scaffold_23533	242.029	0.990632	1	0.9906
7000000633.a:SRS015065_WUGC_scaffold_42565	241.971	0.754931	0.99326	0.7601
7000000626.a:SRS064557_LANL_scaffold_5967	241.787	0.979117	0.999958	0.9792
7000000385.a:SRS017433_Baylor_scaffold_5079	241.373	0.831915	0.999992	0.8319
7000000684.a:SRS019582_WUGC_scaffold_31765	241.226	0.724712	1	0.7247
7000000740.a:SRS064276_LANL_scaffold_24763	241.129	0.648956	0.996726	0.6511
7000000333.a:SRS050925_LANL_scaffold_73619	241.053	0.891604	0.999998	0.8916
7000000071.a:SRS065504_LANL_scaffold_22142	239.712	0.623727	0.952396	0.6549
7000000486.a:SRS015264_WUGC_scaffold_57793	238.619	0.20087	0.552372	0.3636
7000000069.a:SRS016095_WUGC_scaffold_12996	238.436	0.559299	0.997971	0.5604
7000000484.a:SRS016018_WUGC_scaffold_24300	237.496	0.89346	0.999186	0.8942
7000000740.a:SRS064276_LANL_scaffold_54249	237	0.827441	0.999353	0.828
7000000624.a:SRS024435_LANL_scaffold_1544	235.492	0.70949	0.994982	0.7131
7000000306.a:SRS043001_WUGC_scaffold_29736	233.687	0.753567	0.998067	0.755
7000000372.a:SRS045713_WUGC_scaffold_43563	232.616	0.354185	0.952509	0.3718
7000000172.a:SRS020869_Baylor_scaffold_19970	232.29	0.99322	1	0.9932
7000000492.a:SRS048164_WUGC_scaffold_14045	232.254	0.460521	0.907041	0.5077
7000000380.a:C3125682	231.71	0.799133	1	0.7991
7000000441.a:SRS015794_Baylor_scaffold_20364	231.155	0.90441	0.999116	0.9052
7000000302.a:SRS023914_Baylor_scaffold_2355	230.716	0.990386	1	0.9904
7000000460.a:SRS051031_LANL_scaffold_75896	230.589	0.8973	1	0.8973
7000000632.a:SRS050299_LANL_scaffold_14870	230	0.3272	0.996014	0.3285
7000000045.a:SRS013687_Baylor_scaffold_14202	229.453	0.512034	0.957401	0.5348
7000000145.a:SRS050422_LANL_scaffold_92522	228.604	0.993903	1	0.9939
7000000334.a:SRS015217_WUGC_scaffold_38268	228.427	0.96782	0.999706	0.9681
7000000122.a:SRS042284_WUGC_scaffold_8327	227.864	0.594783	0.999999	0.5948
7000000348.a:C1923832	227.438	0.972758	0.999866	0.9729
7000000317.a:SRS014459_WUGC_scaffold_95758	225.942	0.495866	0.871495	0.569
7000000077.a:SRS064645_LANL_scaffold_229	225.054	0.800917	0.995548	0.8045
7000000418.a:SRS012273_Baylor_scaffold_1039	223.693	0.399884	0.955134	0.4187
7000000040.a:SRS043411_WUGC_scaffold_6149	222.552	0.658178	0.974996	0.6751
7000000418.a:C3792972	220	1	0.999983	1
7000000515.a:C2638894	218.383	0.853582	1	0.8536
7000000069.a:SRS016095_WUGC_scaffold_38565	218.185	0.669386	0.911594	0.7343
7000000403.a:SRS024388_LANL_scaffold_84	218.132	0.998815	1	0.9988
3300003146.a:Ga0051080_1009974	217.773	0.407805	0.889952	0.4582
7000000418.a:SRS012273_Baylor_scaffold_23271	215	0.666548	0.940341	0.7088
7000000239.a:SRS013951_WUGC_scaffold_54416	214.429	0.400481	0.999102	0.4008
7000000142.a:SRS016753_Baylor_scaffold_14436	214.187	0.998459	1	0.9985
7000000626.a:SRS064557_LANL_scaffold_6895	214.155	0.34179	0.943653	0.3622
7000000317.a:SRS014459_WUGC_scaffold_94515	213.222	0.640507	0.995755	0.6432
7000000296.a:SRS024009_Baylor_scaffold_694	213.148	0.545284	0.999911	0.5453
7000000271.a:SRS053335_LANL_scaffold_9615	212.457	0.974215	0.999545	0.9747
7000000444.a:SRS063985_LANL_scaffold_6656	211.963	0.304153	0.79679	0.3817
7000000006.a:SRS054956_LANL_scaffold_27325	211.297	0.671007	0.95847	0.7001
7000000444.a:SRS063985_LANL_scaffold_45200	210.914	0.260621	0.725114	0.3594
7000000083.a:C15592677	210.889	0.726165	1	0.7262
7000000265.a:C2881575	210.821	0.483369	0.996793	0.4849
7000000308.a:SRS058770_LANL_scaffold_18662	209.788	0.402763	0.895638	0.4497
7000000112.a:SRS011302_Baylor_scaffold_18218	209.623	0.331969	0.992971	0.3343
7000000444.a:SRS063985_LANL_scaffold_56162	209.55	0.587664	0.965566	0.6086
7000000570.a:SRS051882_Baylor_scaffold_8977	209.397	0.601141	0.993506	0.6051
7000000579.a:SRS017103_Baylor_scaffold_10142	209.236	0.996939	1	0.9969
7000000352.a:SRS014923_WUGC_scaffold_38579	209	0.661937	0.941313	0.7032
7000000632.a:SRS050299_LANL_scaffold_6154	208.707	0.4334	0.863662	0.5018
7000000370.a:C1745436	208.38	0.931295	0.999743	0.9315
7000000075.a:SRS016056_WUGC_scaffold_5364	207.566	0.296575	0.968319	0.3063
7000000490.a:C1875731	206.359	0.712733	0.999294	0.7132
7000000486.a:SRS015264_WUGC_scaffold_57621	206.286	0.780859	0.999993	0.7809
7000000317.a:SRS014459_WUGC_scaffold_86535	206.202	0.471405	0.996296	0.4732
7000000444.a:SRS063985_LANL_scaffold_57495	205.144	0.692529	0.993623	0.697
7000000282.a:SRS019685_WUGC_scaffold_54525	203.504	0.635062	0.999971	0.6351
7000000186.a:SRS022524_Baylor_scaffold_872	203	0.779417	0.965139	0.8076
7000000434.a:SRS014287_WUGC_scaffold_5928	201.526	0.202051	0.638275	0.3166
7000000659.a:SRS015854_WUGC_scaffold_35610	200.758	0.99476	1	0.9948
7000000498.a:SRS017521_Baylor_scaffold_21531	200.653	0.982527	0.999993	0.9825
7000000373.a:SRS016989_Baylor_scaffold_21350	200.084	0.999127	1	0.9991
7000000659.a:SRS015854_WUGC_scaffold_25833	200.053	0.488786	0.997168	0.4902
7000000417.a:SRS011239_Baylor_scaffold_29642	198.59	0.712409	0.996847	0.7147
7000000532.a:SRS011529_WUGC_scaffold_1574	196.195	0.318678	0.997821	0.3194
7000000380.a:C3130888	196.108	0.9324	0.999849	0.9325
7000000278.a:SRS018133_Baylor_scaffold_32432	196.014	0.92075	0.998813	0.9218
7000000570.a:SRS051882_Baylor_scaffold_7329	194.424	0.262044	0.848441	0.3089
7000000036.a:SRS049164_WUGC_scaffold_29471	194.326	0.210908	0.64214	0.3284
7000000040.a:SRS043411_WUGC_scaffold_12384	194.108	0.973142	1	0.9731
7000000690.a:SRS055982_Baylor_scaffold_18510	194.035	0.282616	0.711199	0.3974
7000000433.a:SRS050752_LANL_scaffold_33736	193.249	0.578894	0.975382	0.5935
7000000022.a:SRS011452_WUGC_scaffold_2332	192.989	0.944255	1	0.9443
7000000145.a:SRS050422_LANL_scaffold_89071	192.885	0.577359	0.998594	0.5782
7000000609.a:SRS056519_LANL_scaffold_35840	192.523	0.72506	0.999601	0.7253
7000000628.a:SRS015782_WUGC_scaffold_40061	191.327	0.608904	0.954879	0.6377
7000000646.a:SRS015960_WUGC_scaffold_31617	190.718	0.511061	0.999923	0.5111
7000000032.a:SRS024132_Baylor_scaffold_30054	190.365	0.727306	0.999945	0.7273
7000000145.a:SRS050422_LANL_scaffold_83565	190.095	0.527831	0.998307	0.5287
7000000045.a:SRS013687_Baylor_scaffold_43641	189.053	0.964674	0.999982	0.9647
7000000036.a:SRS049164_WUGC_scaffold_94596	187.848	0.825616	0.999999	0.8256
7000000232.a:SRS015578_WUGC_scaffold_8983	187.534	0.684998	1	0.685
7000000352.a:C3382711	187.517	0.938726	0.999999	0.9387
7000000142.a:SRS016753_Baylor_scaffold_16074	187.468	1	1	1
7000000546.a:SRS019910_WUGC_scaffold_22870	186.595	0.823861	0.99975	0.8241
7000000158.a:C3313952	186.139	0.995267	1	0.9953
7000000297.a:SRS056259_LANL_scaffold_8338	185.952	0.718696	0.947003	0.7589
7000000659.a:C5547216	185.283	0.445808	0.989613	0.4505
7000000188.a:SRS053398_LANL_scaffold_29001	184.824	0.750332	0.989014	0.7587
7000000300.a:SRS043701_LANL_scaffold_17582	184.495	0.622569	0.999999	0.6226
7000000296.a:SRS024009_Baylor_scaffold_6585	183.788	0.765661	1	0.7657
3300003140.a:Ga0051081_1009321	183	0.809686	0.984554	0.8224
7000000142.a:SRS016753_Baylor_scaffold_3218	182.81	0.975076	0.999954	0.9751
7000000317.a:SRS014459_WUGC_scaffold_73917	181.982	0.553466	0.92009	0.6015
7000000441.a:SRS015794_Baylor_scaffold_12587	181.32	0.998789	1	0.9988
3300003140.a:Ga0051081_1006379	181.201	0.66545	0.937551	0.7098
7000000659.a:SRS015854_WUGC_scaffold_21877	180.486	0.937964	1	0.938
7000000186.a:SRS022524_Baylor_scaffold_74229	180.366	0.999977	1	1
7000000187.a:SRS022609_Baylor_scaffold_56409	179.865	0.463166	0.795373	0.5823
7000000646.a:SRS015960_WUGC_scaffold_4748	179.7	0.71233	0.999934	0.7124
7000000418.a:C3799305	178.845	0.694279	0.980942	0.7078
7000000069.a:SRS016095_WUGC_scaffold_19329	178.807	0.997042	1	0.997
7000000641.a:SRS018351_Baylor_scaffold_20507	178.219	0.320692	0.84388	0.38
7000000252.a:C2208458	178	0.910291	0.997198	0.9128
7000000486.a:SRS015264_WUGC_scaffold_3699	177.954	0.222879	0.64412	0.346
7000000069.a:SRS016095_WUGC_scaffold_38404	177.668	0.652729	0.999756	0.6529
7000000661.a:SRS052027_LANL_scaffold_25762	177.57	0.997603	1	0.9976
7000000626.a:SRS064557_LANL_scaffold_32818	177.524	0.415179	0.999346	0.4155
7000000546.a:SRS019910_WUGC_scaffold_71793	176.922	0.235212	0.764161	0.3078
7000000232.a:SRS015578_WUGC_scaffold_34612	176.818	0.572524	0.921737	0.6211
7000000333.a:SRS050925_LANL_scaffold_12390	176.683	0.800554	0.999999	0.8006
7000000641.a:C2815737	176	0.825244	0.977997	0.8438
7000000740.a:SRS064276_LANL_scaffold_8125	175.931	0.238441	0.762984	0.3125
7000000659.a:SRS015854_WUGC_scaffold_37801	175.392	1	1	1
7000000515.a:SRS049995_LANL_scaffold_39163	175.296	0.533682	0.915542	0.5829
7000000401.a:SRS011271_WUGC_scaffold_21242	175.226	0.328058	0.932467	0.3518
7000000087.a:C2384586	175	0.56901	0.982367	0.5792
7000000526.a:SRS019397_WUGC_scaffold_24247	174.826	1	1	1
7000000526.a:SRS019397_WUGC_scaffold_29299	174.786	0.533475	0.954466	0.5589
7000000630.a:SRS062427_LANL_scaffold_10819	173.471	0.674042	0.992832	0.6789
7000000370.a:SRS017191_Baylor_scaffold_7921	173.466	0.758971	1	0.759
7000000380.a:SRS015663_WUGC_scaffold_1668	173.081	0.951428	1	0.9514
7000000262.a:SRS047044_WUGC_scaffold_26682	172.149	0.989803	1	0.9898
7000000308.a:SRS058770_LANL_scaffold_31495	171.597	0.446193	0.993427	0.4491
7000000609.a:SRS056519_LANL_scaffold_21606	170.728	0.879817	0.991545	0.8873
7000000516.a:SRS019161_WUGC_scaffold_51715	170.382	0.278629	0.808188	0.3448
7000000735.a:SRS015190_WUGC_scaffold_10384	170.258	0.804765	0.991405	0.8117
7000000532.a:SRS011529_WUGC_scaffold_31722	168.775	0.882056	1	0.8821
7000000112.a:SRS011302_Baylor_scaffold_22046	168.471	0.913607	1	0.9136
7000000582.a:SRS019787_WUGC_scaffold_23775	168.245	0.78292	1	0.7829
7000000081.a:SRS017307_Baylor_scaffold_31649	168	0.810998	0.961396	0.8436
7000000200.a:SRS023526_Baylor_scaffold_35799	167.885	0.6768	0.998187	0.678
7000000641.a:SRS018351_Baylor_scaffold_29504	166.497	0.470887	0.964956	0.488
7000000628.a:SRS015782_WUGC_scaffold_41222	165.588	0.646328	0.921582	0.7013
7000000308.a:SRS058770_LANL_scaffold_39481	165.535	0.940182	0.999722	0.9404
7000000231.a:SRS014613_WUGC_scaffold_26360	165.301	0.324576	0.682636	0.4755
7000000011.a:SRS053214_LANL_scaffold_17308	165.051	0.952081	0.999996	0.9521
7000000069.a:C2611891	165	0.890375	0.986331	0.9027
7000000624.a:C3238888	164.78	0.636499	0.99383	0.6405
7000000077.a:SRS064645_LANL_scaffold_1093	164.344	0.733764	0.989151	0.7418
7000000040.a:SRS043411_WUGC_scaffold_3673	164.249	0.429117	0.93415	0.4594
7000000098.a:SRS023176_Baylor_scaffold_13473	164.035	0.992336	0.999984	0.9924
7000000628.a:C3504539	163.952	0.78266	0.973692	0.8038
7000000289.a:SRS024331_LANL_scaffold_25078	163.671	0.919834	1	0.9198
7000000187.a:SRS022609_Baylor_scaffold_72992	163.135	0.359383	0.79353	0.4529
7000000186.a:SRS022524_Baylor_scaffold_36388	162	0.825973	0.956776	0.8633
7000000334.a:SRS015217_WUGC_scaffold_16294	161.745	0.316432	0.61842	0.5117
3300002898.a:draft_10007074	161	0.275052	0.826097	0.333
7000000006.a:SRS054956_LANL_scaffold_39961	159.629	0.444056	0.947991	0.4684
7000000459.a:SRS012902_Baylor_scaffold_933	159.252	0.454717	0.99541	0.4568
7000000192.a:SRS017821_Baylor_scaffold_24965	158.872	0.714856	1	0.7149
7000000417.a:SRS011239_Baylor_scaffold_17453	158.106	0.625936	0.999994	0.6259
7000000433.a:SRS050752_LANL_scaffold_20719	157.263	0.617686	0.955793	0.6463
7000000352.a:SRS014923_WUGC_scaffold_57338	157.084	0.769352	0.999997	0.7694
7000000077.a:SRS064645_LANL_scaffold_6414	156	0.759303	0.992734	0.7649
7000000641.a:SRS018351_Baylor_scaffold_1004	155.912	0.345543	0.64641	0.5346
7000000417.a:SRS011239_Baylor_scaffold_497	155.202	0.339534	0.678013	0.5008
7000000418.a:SRS012273_Baylor_scaffold_32604	155	0.319984	0.638047	0.5015
7000000111.a:SRS019601_WUGC_scaffold_2387	155	0.669356	0.89387	0.7488
7000000509.a:SRS054590_LANL_scaffold_1726	153.285	0.275709	0.601279	0.4585
7000000498.a:SRS017521_Baylor_scaffold_48923	153	0.201338	0.583546	0.345
7000000317.a:SRS014459_WUGC_scaffold_74064	152.599	0.650435	0.974843	0.6672
7000000181.a:SRS018656_WUGC_scaffold_12815	152.137	0.371244	0.98719	0.3761
7000000040.a:SRS043411_WUGC_scaffold_49004	152.095	0.740142	0.989241	0.7482
7000000490.a:C1876331	152.072	0.446877	0.983549	0.4544
7000000145.a:SRS050422_LANL_scaffold_47104	151.986	0.242373	0.637099	0.3804
7000000740.a:SRS064276_LANL_scaffold_56045	151.875	0.413289	0.84325	0.4901
7000000289.a:SRS024331_LANL_scaffold_50290	151.351	0.829126	0.997142	0.8315
7000000081.a:SRS017307_Baylor_scaffold_27277	151.019	0.995573	1	0.9956
7000000418.a:C3796595	150.691	0.598182	0.995789	0.6007
7000000481.a:SRS047014_WUGC_scaffold_30051	150.62	0.473601	0.997566	0.4748
7000000695.a:SRS049900_LANL_scaffold_19814	150.117	0.455428	0.932265	0.4885
7000000131.a:SRS057717_LANL_scaffold_11310	150.095	0.64281	0.974868	0.6594
7000000373.a:SRS016989_Baylor_scaffold_8433	150.023	0.8915	1	0.8915
7000000460.a:SRS051031_LANL_scaffold_60087	149.714	0.475156	0.976135	0.4868
7000000609.a:SRS056519_LANL_scaffold_21462	149	0.441045	0.973129	0.4532
7000000444.a:SRS063985_LANL_scaffold_55161	149	0.528385	0.767714	0.6883
7000000641.a:SRS018351_Baylor_scaffold_30620	148.761	0.570431	0.99996	0.5705
7000000112.a:SRS011302_Baylor_scaffold_10199	148.508	0.338601	0.733772	0.4615
7000000239.a:SRS013951_WUGC_scaffold_68045	147.9	0.463043	0.82257	0.5629
7000000624.a:SRS024435_LANL_scaffold_23078	147.804	0.20452	0.500553	0.4086
7000000370.a:SRS017191_Baylor_scaffold_22854	147.218	0.655318	0.988448	0.663
7000000258.a:SRS016335_WUGC_scaffold_23872	147.134	0.784484	0.999427	0.7849
7000000492.a:SRS048164_WUGC_scaffold_10634	146.925	0.597615	0.956866	0.6246
7000000271.a:SRS053335_LANL_scaffold_16345	146.713	0.817683	0.99942	0.8182
7000000069.a:SRS016095_WUGC_scaffold_37872	146	0.541764	0.843619	0.6422
7000000045.a:SRS013687_Baylor_scaffold_35593	146	0.320904	0.656971	0.4885
7000000308.a:SRS058770_LANL_scaffold_4463	145.909	0.970156	0.999999	0.9702
7000000633.a:SRS015065_WUGC_scaffold_18293	145.105	0.990007	1	0.99
7000000690.a:SRS055982_Baylor_scaffold_1947	144.9	0.873522	1	0.8735
7000000624.a:C3240237	144.608	0.525965	0.849549	0.6191
7000000186.a:SRS022524_Baylor_scaffold_76532	144.008	0.646195	0.950244	0.68
7000000380.a:SRS015663_WUGC_scaffold_24762	143.282	0.996243	1	0.9962
7000000373.a:SRS016989_Baylor_scaffold_12475	143.269	0.378241	0.992987	0.3809
7000000272.a:C1593853	143.17	0.883157	0.997097	0.8857
7000000475.a:SRS020328_Baylor_scaffold_38845	143.129	0.307904	0.828587	0.3716
7000000661.a:SRS052027_LANL_scaffold_24881	143	0.326099	0.636351	0.5125
7000000633.a:SRS015065_WUGC_scaffold_14802	141.752	0.734463	0.999992	0.7345
7000000481.a:SRS047014_WUGC_scaffold_69278	141.258	0.701338	0.943494	0.7433
7000000484.a:SRS016018_WUGC_scaffold_17498	141.136	0.501045	0.905751	0.5532
7000000609.a:SRS056519_LANL_scaffold_7746	140.779	0.609577	0.977008	0.6239
7000000418.a:SRS012273_Baylor_scaffold_10390	140.591	0.265666	0.80717	0.3291
7000000628.a:SRS015782_WUGC_scaffold_41754	140.538	0.965981	0.998876	0.9671
7000000444.a:SRS063985_LANL_scaffold_18794	140.081	0.588564	0.98783	0.5958
7000000317.a:SRS014459_WUGC_scaffold_65127	139.757	0.934371	1	0.9344
7000000093.a:SRS022137_LANL_scaffold_3859	139.348	0.698794	0.996577	0.7012
7000000401.a:SRS011271_WUGC_scaffold_1368	138.965	0.821518	0.988449	0.8311
7000000532.a:SRS011529_WUGC_scaffold_31497	138.062	0.769561	1	0.7696
7000000300.a:SRS043701_LANL_scaffold_31205	138.039	0.363675	0.94576	0.3845
7000000098.a:C940628	138.023	0.287341	0.900686	0.319
7000000111.a:SRS019601_WUGC_scaffold_27782	137.861	0.737586	0.99602	0.7405
7000000403.a:C1508528	137.286	0.370768	0.985442	0.3762
7000000418.a:SRS012273_Baylor_scaffold_19058	137.082	0.306145	0.976742	0.3134
7000000071.a:SRS065504_LANL_scaffold_51713	137.003	0.901611	0.995741	0.9055
7000000231.a:SRS014613_WUGC_scaffold_21346	136.116	0.604607	0.995803	0.6072
7000000098.a:SRS023176_Baylor_scaffold_1220	135.725	0.972644	0.999961	0.9727
7000000145.a:SRS050422_LANL_scaffold_87783	135.631	0.442692	0.967672	0.4575
7000000075.a:SRS016056_WUGC_scaffold_12547	134.785	0.962068	1	0.9621
7000000521.a:SRS023583_Baylor_scaffold_4958	134.426	0.648673	0.962358	0.674
7000000317.a:SRS014459_WUGC_scaffold_94545	134.396	0.48368	0.978449	0.4943
7000000006.a:SRS054956_LANL_scaffold_44396	133.184	0.421467	0.715781	0.5888
7000000271.a:SRS053335_LANL_scaffold_30027	133.155	0.445366	0.930155	0.4788
7000000192.a:SRS017821_Baylor_scaffold_5619	133.124	0.717812	0.997924	0.7193
7000000231.a:SRS014613_WUGC_scaffold_28746	133	0.674867	0.983195	0.6864
7000000112.a:SRS011302_Baylor_scaffold_3796	132.556	0.411717	0.804132	0.512
7000000492.a:SRS048164_WUGC_scaffold_8644	132.243	0.625743	0.999939	0.6258
7000000252.a:C2209264	132.213	0.773447	0.994732	0.7775
7000000531.a:SRS049959_WUGC_scaffold_11451	131.644	0.5715	0.956324	0.5976
7000000262.a:SRS047044_WUGC_scaffold_30445	131	0.900178	0.997362	0.9026
7000000045.a:SRS013687_Baylor_scaffold_57499	131	0.276084	0.563506	0.4899
7000000531.a:SRS049959_WUGC_scaffold_59193	130.918	0.520962	0.988674	0.5269
7000000444.a:SRS063985_LANL_scaffold_54067	130.745	0.454082	0.814926	0.5572
7000000475.a:SRS020328_Baylor_scaffold_38663	130	0.124135	0.399546	0.3107
7000000200.a:SRS023526_Baylor_scaffold_24368	129.918	0.875468	1	0.8755
7000000053.a:SRS013215_Baylor_scaffold_1603	129.908	0.994965	1	0.995
7000000460.a:SRS051031_LANL_scaffold_62496	129.779	0.46504	0.939055	0.4952
7000000646.a:SRS015960_WUGC_scaffold_30659	129.26	0.893309	0.999997	0.8933
3300003146.a:Ga0051080_1008079	128.766	0.766075	0.999578	0.7664
7000000258.a:SRS016335_WUGC_scaffold_29794	128	0.229425	0.617505	0.3715
7000000526.a:SRS019397_WUGC_scaffold_22739	127.86	0.488215	0.926134	0.5272
7000000232.a:SRS015578_WUGC_scaffold_29761	127.843	0.407936	0.865855	0.4711
7000000397.a:SRS011586_WUGC_scaffold_30565	127.712	0.46977	0.973547	0.4825
7000000111.a:SRS019601_WUGC_scaffold_13357	127.482	0.279302	0.86659	0.3223
7000000075.a:SRS016056_WUGC_scaffold_1120	127.172	0.987978	1	0.988
7000000475.a:SRS020328_Baylor_scaffold_28549	126.246	0.720942	0.984893	0.732
7000000320.a:SRS063040_Baylor_scaffold_59302	126	0.331392	0.917634	0.3611
7000000191.a:C3074945	124.996	0.247641	0.547882	0.452
7000000736.a:SRS014235_WUGC_scaffold_14063	124.804	0.584567	0.956071	0.6114
7000000100.a:SRS018817_WUGC_scaffold_24100	124.098	0.301785	0.872747	0.3458
7000000069.a:SRS016095_WUGC_scaffold_6087	123.621	0.786981	0.955282	0.8238
7000000546.a:SRS019910_WUGC_scaffold_69936	123.359	0.724613	0.999964	0.7246
7000000334.a:SRS015217_WUGC_scaffold_39092	123	0.576144	0.870169	0.6621
7000000515.a:SRS049995_LANL_scaffold_71	122.849	0.446782	0.804774	0.5552
7000000633.a:SRS015065_WUGC_scaffold_12114	122.421	0.667674	0.961805	0.6942
3300003146.a:Ga0051080_1000173	122.287	0.933958	1	0.934
7000000460.a:SRS051031_LANL_scaffold_12877	122.168	0.843552	0.999298	0.8441
3300003146.a:Ga0051080_1017340	121.765	0.462615	0.94351	0.4903
7000000532.a:SRS011529_WUGC_scaffold_13060	120.949	0.972826	0.999999	0.9728
7000000232.a:SRS015578_WUGC_scaffold_48783	120.28	0.253446	0.631608	0.4013
7000000192.a:SRS017821_Baylor_scaffold_18745	120.083	0.618305	0.969781	0.6376
7000000011.a:SRS053214_LANL_scaffold_26224	119.444	0.978174	0.999986	0.9782
7000000171.a:SRS052697_LANL_scaffold_4602	118.943	0.375681	0.760797	0.4938
7000000736.a:SRS014235_WUGC_scaffold_69501	118.569	0.668218	0.999693	0.6684
7000000022.a:SRS011452_WUGC_scaffold_3680	118.484	0.989298	1	0.9893
7000000107.a:SRS042628_WUGC_scaffold_607	118.38	0.639372	0.980887	0.6518
7000000418.a:C3800405	118	0.650185	0.864303	0.7523
7000000333.a:SRS050925_LANL_scaffold_59006	117.245	0.257323	0.598688	0.4298
7000000455.a:C5192154	117.113	0.981171	0.999817	0.9814
7000000243.a:C4025580	116.839	0.989284	1	0.9893
7000000418.a:SRS012273_Baylor_scaffold_12834	116.63	0.773311	0.979465	0.7895
7000000188.a:SRS053398_LANL_scaffold_45878	116.624	0.558165	0.959315	0.5818
7000000317.a:SRS014459_WUGC_scaffold_20415	116.282	0.625053	0.966729	0.6466
7000000632.a:SRS050299_LANL_scaffold_30827	116.119	0.517899	0.91816	0.5641
7000000308.a:SRS058770_LANL_scaffold_3050	116	0.479328	0.868181	0.5521
7000000498.a:SRS017521_Baylor_scaffold_30298	115.846	0.516405	0.828304	0.6234
7000000628.a:SRS015782_WUGC_scaffold_40312	115.814	0.410666	0.785618	0.5227
3300003146.a:Ga0051080_1002669	115.41	0.83585	0.997292	0.8381
3300003146.a:Ga0051080_1017446	115.356	0.767251	0.999429	0.7677
7000000334.a:C2391372	115	0.533184	0.842187	0.6331
7000000582.a:SRS019787_WUGC_scaffold_10271	114.949	0.172823	0.529286	0.3265
7000000646.a:SRS015960_WUGC_scaffold_17729	114.247	0.353087	0.916572	0.3852
7000000036.a:SRS049164_WUGC_scaffold_30020	113.565	0.460066	0.985654	0.4668
7000000272.a:C1591845	113.387	0.793892	0.995968	0.7971
7000000334.a:SRS015217_WUGC_scaffold_10576	113.143	0.98123	1	0.9812
7000000272.a:C1593689	113.07	0.864818	0.998813	0.8658
7000000460.a:SRS051031_LANL_scaffold_75555	112.915	0.368139	0.913179	0.4031
7000000231.a:SRS014613_WUGC_scaffold_6140	112.871	0.900486	0.999884	0.9006
7000000100.a:C2137516	112.645	0.789474	0.997592	0.7914
7000000200.a:SRS023526_Baylor_scaffold_35863	111.923	0.4881	0.833484	0.5856
7000000045.a:SRS013687_Baylor_scaffold_56407	111.658	0.588187	0.877857	0.67
7000000492.a:SRS048164_WUGC_scaffold_37566	111.384	0.622174	0.971495	0.6404
7000000231.a:SRS014613_WUGC_scaffold_12192	111.337	0.597752	0.99409	0.6013
7000000646.a:SRS015960_WUGC_scaffold_2062	111	0.104548	0.343655	0.3042
7000000094.a:SRS024549_LANL_scaffold_3060	111	0.852132	0.997361	0.8544
7000000308.a:SRS058770_LANL_scaffold_36820	110.777	0.607192	0.992874	0.6116
7000000736.a:SRS014235_WUGC_scaffold_72751	110.009	0.324315	0.676407	0.4795
7000000348.a:C1920110	110	0.859839	0.997084	0.8624
7000000632.a:SRS050299_LANL_scaffold_14531	109.9	1	1	1
7000000526.a:SRS019397_WUGC_scaffold_26364	109.842	0.454836	0.955944	0.4758
7000000397.a:C3569728	109.654	0.687322	0.98368	0.6987
7000000587.a:C751183	108.931	0.529352	0.999472	0.5296
7000000641.a:SRS018351_Baylor_scaffold_32348	108.825	0.325642	0.788456	0.413
7000000410.a:SRS019030_Baylor_scaffold_2022	108.501	0.244101	0.728113	0.3353
7000000329.a:SRS016495_LANL_scaffold_19678	108.295	0.95581	1	0.9558
7000000385.a:SRS017433_Baylor_scaffold_19041	108.231	0.138828	0.407947	0.3403
7000000178.a:SRS017247_LANL_scaffold_9725	108.142	0.296013	0.971587	0.3047
7000000193.a:SRS048870_WUGC_scaffold_16176	107.847	0.404309	0.786592	0.514
7000000122.a:SRS042284_WUGC_scaffold_2929	107.827	0.583257	0.999994	0.5833
7000000521.a:SRS023583_Baylor_scaffold_6618	107.623	0.48919	0.993251	0.4925
7000000633.a:SRS015065_WUGC_scaffold_40472	107.56	0.52813	0.963859	0.5479
7000000475.a:SRS020328_Baylor_scaffold_31930	107	0.355075	0.971424	0.3655
7000000300.a:SRS043701_LANL_scaffold_19652	106.871	0.955108	1	0.9551
7000000661.a:SRS052027_LANL_scaffold_2577	106.72	0.476813	0.789619	0.6039
7000000192.a:SRS017821_Baylor_scaffold_4645	106	0.186521	0.465047	0.4011
7000000441.a:SRS015794_Baylor_scaffold_27481	106	0.386008	0.867856	0.4448
7000000333.a:SRS050925_LANL_scaffold_40147	105.561	0.145962	0.405395	0.36
7000000071.a:C3430683	105.462	0.723389	0.987197	0.7328
7000000171.a:SRS052697_LANL_scaffold_54647	105.389	0.654761	0.920746	0.7111
7000000475.a:SRS020328_Baylor_scaffold_36784	105.05	0.562396	0.993632	0.566
7000000531.a:SRS049959_WUGC_scaffold_37177	105	0.817505	0.981628	0.8328
7000000320.a:SRS063040_Baylor_scaffold_59223	104.953	0.816107	1	0.8161
7000000188.a:SRS053398_LANL_scaffold_13506	104.759	0.949903	1	0.9499
7000000232.a:SRS015578_WUGC_scaffold_35829	104.278	0.246847	0.772413	0.3196
7000000297.a:C1924856	103.608	0.639124	0.999133	0.6397
7000000045.a:SRS013687_Baylor_scaffold_34257	103.563	0.2206	0.438849	0.5027
7000000012.a:SRS018313_Baylor_scaffold_1909	103.245	0.289695	0.785456	0.3688
7000000069.a:SRS016095_WUGC_scaffold_33065	103.115	0.256373	0.823868	0.3112
7000000334.a:SRS015217_WUGC_scaffold_24320	103.074	0.631762	0.961903	0.6568
7000000403.a:C1508552	103.029	0.860049	0.99927	0.8607
7000000515.a:SRS049995_LANL_scaffold_21566	103.014	0.482344	0.710933	0.6785
7000000186.a:SRS022524_Baylor_scaffold_62690	103	0.479231	0.801258	0.5981
7000000526.a:SRS019397_WUGC_scaffold_23811	102.585	0.556889	0.989094	0.563
7000000258.a:C5290893	102	0.77744	0.979826	0.7934
7000000333.a:SRS050925_LANL_scaffold_48374	101.522	0.304722	0.627544	0.4856
7000000232.a:SRS015578_WUGC_scaffold_39883	101.143	0.111817	0.342732	0.3263
7000000317.a:SRS014459_WUGC_scaffold_78318	101	0.617601	0.892313	0.6921
7000000243.a:SRS045004_LANL_scaffold_30107	100.845	0.33189	0.972211	0.3414
7000000289.a:SRS024331_LANL_scaffold_42203	100.409	0.834015	0.98966	0.8427
7000000475.a:SRS020328_Baylor_scaffold_36549	100.137	0.439908	0.987703	0.4454
7000000526.a:SRS019397_WUGC_scaffold_31504	99.8652	0.591615	0.824304	0.7177
7000000540.a:SRS023346_LANL_scaffold_8664	99.5993	0.435324	0.948832	0.4588
7000000178.a:SRS017247_LANL_scaffold_3221	99.5777	0.277452	0.61894	0.4483
7000000297.a:C1928366	99.4706	0.941268	1	0.9413
7000000498.a:SRS017521_Baylor_scaffold_31148	99.3856	0.43022	0.949308	0.4532
7000000460.a:SRS051031_LANL_scaffold_8635	99.2195	0.398612	0.917143	0.4346
7000000158.a:SRS014979_WUGC_scaffold_16138	98.8632	0.811328	0.999976	0.8113
7000000540.a:SRS023346_LANL_scaffold_1239	97.9912	0.836882	1	0.8369
7000000380.a:SRS015663_WUGC_scaffold_13143	97.7991	0.983052	1	0.9831
7000000077.a:C469590	97.7923	0.954454	0.998573	0.9558
7000000069.a:SRS016095_WUGC_scaffold_15442	97.6957	0.834022	0.999756	0.8342
7000000053.a:SRS013215_Baylor_scaffold_5549	97.6036	0.701742	0.999959	0.7018
7000000320.a:C3357091	96.538	0.669068	1	0.6691
7000000142.a:SRS016753_Baylor_scaffold_5343	96.5323	0.290389	0.929359	0.3125
7000000246.a:SRS078176_LANL_scaffold_6277	96.2431	0.778528	0.999997	0.7785
7000000515.a:C2637932	96.2431	0.778528	0.999997	0.7785
7000000498.a:SRS017521_Baylor_scaffold_56819	96.2077	0.963974	0.999424	0.9645
7000000333.a:C2246634	95.8209	0.622188	0.962093	0.6467
3300002898.a:draft_10019077	95.8209	0.28861	0.888846	0.3247
7000000334.a:SRS015217_WUGC_scaffold_6542	95.1016	0.278682	0.853756	0.3264
7000000158.a:C3311271	94	0.336714	0.955574	0.3524
7000000038.a:C4277215	93	0.564192	0.84269	0.6695
7000000441.a:SRS015794_Baylor_scaffold_35365	92.9338	0.309043	0.834913	0.3702
7000000641.a:C2815243	92.7396	0.520191	0.946094	0.5498
7000000308.a:SRS058770_LANL_scaffold_33090	92.7023	0.902389	0.999444	0.9029
7000000334.a:SRS015217_WUGC_scaffold_14773	92.3501	0.331985	0.778605	0.4264
3300003140.a:Ga0051081_1001618	92.2129	0.481155	0.974366	0.4938
7000000684.a:SRS019582_WUGC_scaffold_37403	92	0.702011	0.90075	0.7794
7000000193.a:SRS048870_WUGC_scaffold_26582	91.5966	0.566845	0.907446	0.6247
7000000695.a:SRS049900_LANL_scaffold_6451	91.3179	0.526362	0.97679	0.5389
7000000186.a:SRS022524_Baylor_scaffold_13270	90.7671	0.585456	0.932982	0.6275
7000000632.a:SRS050299_LANL_scaffold_8422	90.2988	0.222398	0.709571	0.3134
7000000410.a:SRS019030_Baylor_scaffold_9203	90.1528	0.608729	0.99329	0.6128
7000000372.a:SRS045713_WUGC_scaffold_23614	90.1477	0.397953	0.891196	0.4465
7000000628.a:SRS015782_WUGC_scaffold_41587	89.8819	0.362631	0.999564	0.3628
7000000740.a:SRS064276_LANL_scaffold_16784	89.8406	0.824855	1	0.8249
7000000526.a:SRS019397_WUGC_scaffold_17560	89.8367	0.922258	0.999999	0.9223
7000000300.a:SRS043701_LANL_scaffold_31342	89.7002	0.900118	1	0.9001
7000000690.a:SRS055982_Baylor_scaffold_18269	89.6995	0.32693	0.93222	0.3507
7000000192.a:SRS017821_Baylor_scaffold_15726	89.6549	0.917854	1	0.9179
7000000630.a:SRS062427_LANL_scaffold_11523	89.5283	0.733218	0.997989	0.7347
7000000736.a:SRS014235_WUGC_scaffold_53927	89.1794	0.23294	0.582562	0.3999
7000000546.a:SRS019910_WUGC_scaffold_7419	89.1271	0.704898	0.994844	0.7086
7000000100.a:SRS018817_WUGC_scaffold_11631	89.0051	0.820222	1	0.8202
7000000492.a:C2361982	88.4915	0.515703	1	0.5157
7000000397.a:SRS011586_WUGC_scaffold_19136	88.0403	0.875474	1	0.8755
7000000715.a:SRS014683_WUGC_scaffold_51928	87.2391	0.362211	0.871362	0.4157
7000000418.a:C3798771	87	0.679709	0.909669	0.7472
7000000385.a:SRS017433_Baylor_scaffold_13147	86.232	0.370811	0.6942	0.5342
7000000628.a:SRS015782_WUGC_scaffold_31707	85.8411	0.724631	0.927619	0.7812
7000000690.a:SRS055982_Baylor_scaffold_15216	85.6571	0.361837	0.860182	0.4207
7000000262.a:SRS047044_WUGC_scaffold_25765	84.8963	0.680292	0.999996	0.6803
7000000045.a:SRS013687_Baylor_scaffold_37560	84.5211	0.582719	0.997238	0.5843
3300003155.a:Ga0052270_10359829	84.5048	0.145606	0.408379	0.3565
7000000334.a:C2390986	84	0.564593	0.859856	0.6566
7000000401.a:C3193827	83.6097	0.995688	1	0.9957
7000000231.a:SRS014613_WUGC_scaffold_22821	83.4534	0.376433	0.909665	0.4138
7000000695.a:SRS049900_LANL_scaffold_14509	83	0.223354	0.492353	0.4536
7000000532.a:C4776323	82.588	0.718809	0.99487	0.7225
7000000460.a:SRS051031_LANL_scaffold_54450	82.5196	0.27402	0.794217	0.345
7000000460.a:SRS051031_LANL_scaffold_37476	82.4021	0.442345	0.892091	0.4959
7000000626.a:SRS064557_LANL_scaffold_32683	82	0.298964	0.946252	0.3159
7000000200.a:C3237021	81.9611	0.332027	0.999402	0.3322
7000000633.a:SRS015065_WUGC_scaffold_42101	81.9101	0.496787	0.894637	0.5553
7000000075.a:SRS016056_WUGC_scaffold_13349	81.3952	0.950379	0.999357	0.951
7000000187.a:SRS022609_Baylor_scaffold_11937	81.3904	0.256429	0.820966	0.3123
7000000570.a:SRS051882_Baylor_scaffold_30050	81.23	0.525342	0.983123	0.5344
7000000112.a:SRS011302_Baylor_scaffold_7985	81.1972	0.675409	0.984265	0.6862
7000000486.a:SRS015264_WUGC_scaffold_10513	81.1186	0.765304	1	0.7653
7000000531.a:SRS049959_WUGC_scaffold_14215	80.6547	0.427258	0.73984	0.5775
7000000407.a:SRS019267_WUGC_scaffold_10268	79.8339	0.437281	0.994452	0.4397
7000000684.a:SRS019582_WUGC_scaffold_92713	79.5345	0.453763	0.994375	0.4563
7000000302.a:SRS023914_Baylor_scaffold_5392	79.529	0.749001	0.99658	0.7516
7000000444.a:SRS063985_LANL_scaffold_11584	79.3581	0.224134	0.486683	0.4605
7000000628.a:SRS015782_WUGC_scaffold_11657	79.1541	0.999818	1	0.9998
7000000418.a:SRS012273_Baylor_scaffold_31399	79	0.480407	0.839374	0.5723
7000000243.a:SRS045004_LANL_scaffold_32934	78.7891	0.315509	0.879174	0.3589
7000000348.a:SRS017701_Baylor_scaffold_15014	78.4901	0.345934	0.86796	0.3986
7000000538.a:SRS024075_LANL_scaffold_4133	78.2319	0.233427	0.525156	0.4445
7000000071.a:SRS065504_LANL_scaffold_41837	77.9017	0.604638	0.911101	0.6636
7000000531.a:C3986356	77.4335	0.304752	0.928884	0.3281
7000000579.a:C2738758	77.4067	0.829198	0.987966	0.8393
7000000333.a:SRS050925_LANL_scaffold_74052	77.2648	0.374387	0.867214	0.4317
7000000045.a:SRS013687_Baylor_scaffold_59707	77.146	0.365743	0.928635	0.3939
7000000429.a:SRS045645_Baylor_scaffold_16353	77.0045	0.567026	0.973887	0.5822
7000000045.a:SRS013687_Baylor_scaffold_35352	77	0.193618	0.579929	0.3339
7000000231.a:SRS014613_WUGC_scaffold_31416	77	0.792118	0.978316	0.8097
3300003140.a:Ga0051081_1002146	76.8626	0.760754	0.999963	0.7608
7000000087.a:C2384524	76.8025	0.427922	0.945592	0.4525
7000000464.a:SRS077730_LANL_scaffold_17891	76.3789	0.852282	0.999994	0.8523
7000000081.a:SRS017307_Baylor_scaffold_32974	76.3048	0.451914	0.935523	0.4831
7000000158.a:SRS014979_WUGC_scaffold_24901	76.1541	0.84709	1	0.8471
7000000107.a:C2757942	76.0562	1	1	1
7000000334.a:SRS015217_WUGC_scaffold_23760	76	0.163262	0.465914	0.3504
7000000142.a:SRS016753_Baylor_scaffold_15524	75.6946	0.279241	0.836091	0.334
7000000006.a:SRS054956_LANL_scaffold_40945	75.3521	0.14953	0.361777	0.4133
7000000012.a:SRS018313_Baylor_scaffold_15562	75.2655	0.620809	0.895175	0.6935
7000000486.a:SRS015264_WUGC_scaffold_13311	75.1403	0.121647	0.278012	0.4376
7000000265.a:C2879104	75.0615	0.939583	0.999995	0.9396
7000000093.a:SRS022137_LANL_scaffold_19454	74.7041	0.687242	1	0.6872
7000000348.a:SRS017701_Baylor_scaffold_16869	74.6809	0.286889	0.849783	0.3376
7000000112.a:SRS011302_Baylor_scaffold_21195	74.5782	0.290098	0.736944	0.3936
7000000630.a:SRS062427_LANL_scaffold_4175	74.4008	0.45107	0.858076	0.5257
7000000192.a:C2499092	74.2086	0.340914	0.95593	0.3566
7000000188.a:SRS053398_LANL_scaffold_34423	74.1375	0.237533	0.681503	0.3485
7000000712.a:SRS057478_LANL_scaffold_1961	73.4514	0.184347	0.41067	0.4489
7000000258.a:SRS016335_WUGC_scaffold_45122	73.1668	0.636595	0.976457	0.6519
7000000444.a:SRS063985_LANL_scaffold_18651	73.1554	0.22549	0.566296	0.3982
7000000352.a:SRS014923_WUGC_scaffold_50647	73.0407	0.518443	0.867555	0.5976
7000000646.a:SRS015960_WUGC_scaffold_4308	72.9984	0.30462	0.836239	0.3643
7000000069.a:SRS016095_WUGC_scaffold_29050	72.8349	0.387743	0.82665	0.4691
7000000142.a:C1101728	72.7125	0.738435	0.934839	0.7899
7000000300.a:C1857542	72.1613	0.349492	0.907896	0.3849
7000000333.a:SRS050925_LANL_scaffold_38431	72	0.372211	0.633507	0.5875
7000000736.a:SRS014235_WUGC_scaffold_20870	71.9082	0.264101	0.846311	0.3121
7000000641.a:SRS018351_Baylor_scaffold_7885	71.9009	0.194532	0.358213	0.5431
7000000570.a:SRS051882_Baylor_scaffold_24810	71.8086	0.71559	0.992582	0.7209
7000000193.a:SRS048870_WUGC_scaffold_51544	71.4371	0.296675	0.686342	0.4323
7000000053.a:C694232	71.371	0.770719	0.971053	0.7937
7000000112.a:SRS011302_Baylor_scaffold_6142	71.3524	0.929276	0.999849	0.9294
7000000192.a:SRS017821_Baylor_scaffold_23929	71.1502	0.892335	0.996967	0.895
7000000464.a:SRS077730_LANL_scaffold_11463	71	0.127772	0.364831	0.3502
7000000403.a:SRS024388_LANL_scaffold_15622	70.5713	0.75753	0.938574	0.8071
7000000193.a:SRS048870_WUGC_scaffold_5147	70.3146	0.714345	1	0.7143
7000000740.a:SRS064276_LANL_scaffold_66376	70.2427	0.639952	0.998551	0.6409
7000000352.a:SRS014923_WUGC_scaffold_59532	70.1085	0.337391	0.815707	0.4136
7000000186.a:C1708626	70.0771	0.987871	0.999999	0.9879
7000000669.a:SRS022713_LANL_scaffold_20106	70	0.12225	0.299379	0.4083
7000000433.a:SRS050752_LANL_scaffold_16318	69.8081	0.27887	0.669422	0.4166
7000000455.a:C5192374	69.086	0.617702	0.969242	0.6373
7000000482.a:SRS016541_Baylor_scaffold_10411	69.0061	0.990933	1	0.9909
7000000403.a:SRS024388_LANL_scaffold_14965	69	0.489481	0.865272	0.5657
7000000191.a:C3074821	68.9131	0.282013	0.749622	0.3762
7000000370.a:SRS017191_Baylor_scaffold_23433	68.848	0.988696	1	0.9887
7000000145.a:SRS050422_LANL_scaffold_91555	68.2962	0.286627	0.875645	0.3273
7000000481.a:SRS047014_WUGC_scaffold_57424	67.7103	0.813733	1	0.8137
7000000038.a:C4274425	67.6664	0.507273	0.976051	0.5197
7000000627.a:SRS014313_WUGC_scaffold_2536	67.5601	0.596606	0.985809	0.6052
7000000332.a:C3518214	67.2022	0.450167	0.974268	0.4621
7000000715.a:SRS014683_WUGC_scaffold_52300	67.1478	0.392156	0.769037	0.5099
7000000373.a:SRS016989_Baylor_scaffold_1176	66.9089	0.921419	1	0.9214
7000000646.a:SRS015960_WUGC_scaffold_18811	66.8944	0.468956	0.994305	0.4716
7000000232.a:SRS015578_WUGC_scaffold_2456	66.8943	0.577987	0.99683	0.5798
7000000531.a:SRS049959_WUGC_scaffold_47592	66.8348	0.609199	0.991579	0.6144
7000000200.a:SRS023526_Baylor_scaffold_9740	66.7701	0.714933	0.990358	0.7219
7000000296.a:C1830682	66.5329	0.226466	0.63565	0.3563
7000000112.a:SRS011302_Baylor_scaffold_24370	66.4267	0.241971	0.593782	0.4075
7000000475.a:SRS020328_Baylor_scaffold_8726	66.4	0.941788	1	0.9418
7000000429.a:C2069547	66.1135	0.805505	0.955478	0.843
7000000659.a:SRS015854_WUGC_scaffold_24201	66	0.166247	0.528667	0.3145
7000000531.a:C3986072	65.9608	0.623606	0.906499	0.6879
7000000526.a:SRS019397_WUGC_scaffold_24605	65.5848	0.822225	0.991683	0.8291
7000000158.a:SRS014979_WUGC_scaffold_36155	65.372	0.436408	0.708489	0.616
7000000633.a:SRS015065_WUGC_scaffold_8912	65.3345	0.423089	0.953755	0.4436
7000000609.a:SRS056519_LANL_scaffold_5348	65.1938	0.379769	0.905349	0.4195
7000000538.a:SRS024075_LANL_scaffold_6803	65.1761	0.537534	0.997685	0.5388
7000000071.a:C3429893	65.1482	0.972249	1	0.9722
7000000559.a:SRS058723_Baylor_scaffold_11877	64.8387	0.445029	0.748565	0.5945
7000000071.a:C3429697	64.8287	0.766824	1	0.7668
7000000171.a:SRS052697_LANL_scaffold_67317	64.408	0.160369	0.50038	0.3205
7000000626.a:SRS064557_LANL_scaffold_21019	64.2929	0.300331	0.677205	0.4435
2032320001.a:PCEOT_contig05514	64.2107	0.529036	0.90029	0.5876
7000000243.a:C4025848	64.1099	0.274432	0.836353	0.3281
7000000431.a:SRS013158_Baylor_scaffold_1547	64	0.197328	0.492772	0.4004
7000000333.a:C2246552	63.8709	0.98201	0.999992	0.982
7000000418.a:C3798077	63.8206	0.822924	0.996455	0.8259
7000000329.a:SRS016495_LANL_scaffold_3171	63.8015	0.962593	0.999998	0.9626
7000000302.a:SRS023914_Baylor_scaffold_27827	63.7084	0.268468	0.543725	0.4938
7000000352.a:SRS014923_WUGC_scaffold_28776	63.6502	0.49019	0.997744	0.4913
7000000401.a:SRS011271_WUGC_scaffold_38918	63.4558	0.294418	0.97364	0.3024
7000000069.a:SRS016095_WUGC_scaffold_21415	63.3837	0.899003	0.998993	0.8999
7000000145.a:SRS050422_LANL_scaffold_80286	63.0746	0.304974	0.834962	0.3653
7000000193.a:SRS048870_WUGC_scaffold_4639	62.9756	0.999706	1	0.9997
7000000231.a:SRS014613_WUGC_scaffold_32612	62.9406	0.117218	0.379107	0.3092
7000000188.a:SRS053398_LANL_scaffold_1381	62.6302	0.961193	1	0.9612
7000000334.a:SRS015217_WUGC_scaffold_39375	62.557	0.998872	1	0.9989
7000000187.a:SRS022609_Baylor_scaffold_41591	62.5316	0.575361	0.970804	0.5927
3300003146.a:Ga0051080_1015683	62.1295	0.334125	0.616368	0.5421
7000000531.a:SRS049959_WUGC_scaffold_60359	61.93	0.357162	0.798768	0.4471
7000000187.a:SRS022609_Baylor_scaffold_91369	61.7966	0.691648	0.986364	0.7012
7000000036.a:SRS049164_WUGC_scaffold_60281	61.7493	0.725515	0.999254	0.7261
7000000087.a:C2383728	61.6802	0.320424	0.924571	0.3466
7000000559.a:SRS058723_Baylor_scaffold_12987	61.6185	0.295212	0.861955	0.3425
7000000475.a:SRS020328_Baylor_scaffold_33279	61.5924	0.55406	0.879688	0.6298
7000000081.a:SRS017307_Baylor_scaffold_32312	61.1958	0.395646	0.971175	0.4074
7000000231.a:SRS014613_WUGC_scaffold_33929	61	0.242011	0.575579	0.4205
7000000297.a:SRS056259_LANL_scaffold_57912	61	0.226359	0.742072	0.305
7000000401.a:SRS011271_WUGC_scaffold_21650	60.9338	0.99895	1	0.999
7000000498.a:SRS017521_Baylor_scaffold_6217	60.7499	0.219645	0.549394	0.3998
7000000187.a:SRS022609_Baylor_scaffold_26530	60.3968	0.586445	0.959813	0.611
7000000441.a:SRS015794_Baylor_scaffold_29877	60.2697	0.428146	0.868689	0.4929
7000000661.a:C1907614	60.0973	0.743379	1	0.7434
7000000334.a:SRS015217_WUGC_scaffold_23239	59.9893	0.895915	1	0.8959
7000000695.a:SRS049900_LANL_scaffold_13946	59.7727	0.631821	0.958636	0.6591
7000000297.a:SRS056259_LANL_scaffold_28519	59.6637	0.634496	0.871312	0.7282
7000000258.a:SRS016335_WUGC_scaffold_4444	59.5541	0.270305	0.579549	0.4664
7000000075.a:SRS016056_WUGC_scaffold_5444	58.8188	0.629851	0.939472	0.6704
7000000057.a:SRS013818_Baylor_scaffold_11447	58.3642	0.119785	0.282341	0.4243
7000000370.a:SRS017191_Baylor_scaffold_10269	58.1387	0.302442	0.798072	0.379
7000000191.a:C3068823	58	0.306884	0.862442	0.3558
7000000188.a:SRS053398_LANL_scaffold_41186	58	0.195015	0.354052	0.5508
7000000239.a:SRS013951_WUGC_scaffold_4432	57.7752	0.26865	0.890614	0.3016
7000000300.a:SRS043701_LANL_scaffold_8729	57.679	0.122234	0.3811	0.3207
7000000433.a:SRS050752_LANL_scaffold_17525	57.4367	0.236104	0.423878	0.557
7000000587.a:C751375	57.1779	0.457217	0.976336	0.4683
7000000434.a:SRS014287_WUGC_scaffold_33195	57.1036	0.227632	0.563013	0.4043
7000000231.a:C1594339	57	0.272275	0.53825	0.5059
7000000434.a:C2012148	57	0.492732	0.848355	0.5808
7000000131.a:SRS057717_LANL_scaffold_15371	56.5692	0.244547	0.781863	0.3128
7000000178.a:C1045184	56.365	0.852706	0.999832	0.8528
7000000262.a:SRS047044_WUGC_scaffold_22240	56.0524	0.63618	1	0.6362
7000000262.a:SRS047044_WUGC_scaffold_28336	56.0356	0.999474	1	0.9995
7000000459.a:SRS012902_Baylor_scaffold_6075	56.0135	0.232511	0.585163	0.3973
7000000464.a:SRS077730_LANL_scaffold_16842	56.0121	0.733942	0.999999	0.7339
7000000531.a:SRS049959_WUGC_scaffold_14146	56	0.288453	0.545046	0.5292
7000000174.a:C7614445	56	0.663096	0.92595	0.7161
7000000475.a:SRS020328_Baylor_scaffold_26075	56	0.372237	0.805617	0.4621
7000000372.a:SRS045713_WUGC_scaffold_39160	55.8786	0.34797	0.729419	0.4771
7000000107.a:SRS042628_WUGC_scaffold_29665	55.7837	0.897941	0.995188	0.9023
7000000098.a:SRS023176_Baylor_scaffold_1716	55.7018	0.379725	0.968276	0.3922
7000000417.a:SRS011239_Baylor_scaffold_29039	55.343	0.550879	0.860094	0.6405
7000000302.a:C2143741	55.2498	0.506026	0.975845	0.5186
7000000740.a:SRS064276_LANL_scaffold_37879	55	0.535362	0.702379	0.7622
7000000231.a:SRS014613_WUGC_scaffold_33300	55	0.155882	0.425492	0.3664
7000000475.a:SRS020328_Baylor_scaffold_29209	54.9828	0.755772	0.991169	0.7625
7000000258.a:C5291617	54.9593	0.667682	0.921602	0.7245
7000000695.a:SRS049900_LANL_scaffold_9781	54.7309	0.579403	0.943187	0.6143
7000000475.a:SRS020328_Baylor_scaffold_36813	54.7284	0.60023	0.984304	0.6098
7000000011.a:SRS053214_LANL_scaffold_27270	54.7176	0.40162	0.813116	0.4939
7000000516.a:SRS019161_WUGC_scaffold_67209	54.6649	0.57835	0.834956	0.6927
7000000626.a:SRS064557_LANL_scaffold_27676	54.5196	0.992927	1	0.9929
7000000243.a:SRS045004_LANL_scaffold_20991	54.303	0.99763	1	0.9976
7000000444.a:SRS063985_LANL_scaffold_40030	54	0.146783	0.413145	0.3553
7000000628.a:SRS015782_WUGC_scaffold_4156	53.9516	0.209925	0.611084	0.3435
7000000736.a:SRS014235_WUGC_scaffold_73179	53.8794	0.296723	0.797334	0.3721
7000000239.a:SRS013951_WUGC_scaffold_14463	53.5386	0.910644	1	0.9106
7000000297.a:SRS056259_LANL_scaffold_53198	53.5088	0.683826	0.999569	0.6841
7000000333.a:SRS050925_LANL_scaffold_26464	53.4827	0.39847	0.714698	0.5575
7000000071.a:SRS065504_LANL_scaffold_56682	53.3624	0.679012	0.903248	0.7517
7000000418.a:SRS012273_Baylor_scaffold_34301	53.2473	0.362626	0.680085	0.5332
7000000455.a:C5192676	53	0.248001	0.621083	0.3993
7000000609.a:SRS056519_LANL_scaffold_34257	52.7857	0.627041	0.995974	0.6296
7000000231.a:SRS014613_WUGC_scaffold_22672	52.3767	0.795926	0.996885	0.7984
7000000188.a:SRS053398_LANL_scaffold_35462	52.2461	0.528441	0.904535	0.5842
7000000045.a:C2659494	52.193	0.748103	1	0.7481
7000000071.a:SRS065504_LANL_scaffold_51345	52.1764	0.342002	0.80187	0.4265
7000000188.a:SRS053398_LANL_scaffold_10740	52.1219	0.486445	0.906169	0.5368
7000000401.a:SRS011271_WUGC_scaffold_34395	52.088	0.886213	0.988623	0.8964
7000000262.a:SRS047044_WUGC_scaffold_22477	52.0854	0.427497	0.856929	0.4989
7000000111.a:SRS019601_WUGC_scaffold_29116	51.9424	0.248013	0.814902	0.3043
7000000069.a:SRS016095_WUGC_scaffold_1149	51.9364	0.584893	0.931035	0.6282
7000000492.a:SRS048164_WUGC_scaffold_20878	51.9152	0.467319	0.999499	0.4676
7000000071.a:SRS065504_LANL_scaffold_41506	51.8414	0.340641	0.694844	0.4902
7000000401.a:SRS011271_WUGC_scaffold_33760	51.7648	0.426047	0.768255	0.5546
7000000333.a:SRS050925_LANL_scaffold_26956	51.6376	0.276047	0.531485	0.5194
7000000348.a:SRS017701_Baylor_scaffold_17768	51.5059	0.529665	0.882616	0.6001
7000000011.a:SRS053214_LANL_scaffold_26325	51.3958	0.675299	0.987524	0.6838
7000000486.a:SRS015264_WUGC_scaffold_19308	51.2907	0.863144	0.998566	0.8644
7000000107.a:SRS042628_WUGC_scaffold_24205	51.2547	0.196741	0.536533	0.3667
7000000258.a:C5291967	51	0.276969	0.628406	0.4407
7000000334.a:SRS015217_WUGC_scaffold_19867	50.7461	0.357683	0.60707	0.5892
7000000040.a:SRS043411_WUGC_scaffold_46143	50.4284	0.454708	0.978307	0.4648
7000000302.a:SRS023914_Baylor_scaffold_28174	50.2797	0.425989	0.955017	0.4461
7000000172.a:SRS020869_Baylor_scaffold_7251	50.0823	0.751614	0.997582	0.7534
7000000187.a:SRS022609_Baylor_scaffold_6575	50.0685	0.267032	0.625193	0.4271
7000000380.a:SRS015663_WUGC_scaffold_47728	50	0.264178	0.518757	0.5093
7000000191.a:C3073209	49.8586	0.854489	0.994223	0.8595
7000000380.a:SRS015663_WUGC_scaffold_23774	49.1038	0.997146	1	0.9971
7000000040.a:SRS043411_WUGC_scaffold_30879	49.0778	0.739984	0.990079	0.7474
7000000334.a:SRS015217_WUGC_scaffold_38988	49.0198	0.938483	0.99991	0.9386
7000000498.a:SRS017521_Baylor_scaffold_37849	49	0.319513	0.616548	0.5182
7000000526.a:SRS019397_WUGC_scaffold_26363	48.8937	0.421211	0.775847	0.5429
7000000193.a:SRS048870_WUGC_scaffold_21251	48.7982	0.963164	1	0.9632
7000000191.a:C3073103	48.6086	0.66949	0.990265	0.6761
7000000188.a:SRS053398_LANL_scaffold_48035	48.569	0.393116	0.850817	0.462
7000000332.a:SRS015133_WUGC_scaffold_43023	48.5277	0.34105	0.701589	0.4861
7000000087.a:C2385192	48.0674	0.433879	0.872883	0.4971
7000000418.a:C3795124	47.9602	0.450667	0.994221	0.4533
7000000111.a:SRS019601_WUGC_scaffold_39244	47.7795	0.71896	0.937996	0.7665
7000000100.a:SRS018817_WUGC_scaffold_26494	47.7299	0.284914	0.637042	0.4472
7000000521.a:SRS023583_Baylor_scaffold_5334	47.6718	0.947138	1	0.9471
7000000498.a:SRS017521_Baylor_scaffold_55733	47.6488	0.187172	0.490006	0.382
7000000582.a:SRS019787_WUGC_scaffold_7978	47.6251	0.306984	1	0.307
7000000655.a:SRS019968_Baylor_scaffold_873	47.4371	0.565683	0.998803	0.5664
7000000265.a:C2882465	47.342	0.360287	0.750371	0.4801
7000000624.a:SRS024435_LANL_scaffold_33797	47.3251	0.766995	1	0.767
7000000484.a:SRS016018_WUGC_scaffold_15730	47.2252	0.895641	1	0.8956
7000000543.a:SRS024265_LANL_scaffold_16167	47.1731	0.890833	0.999471	0.8913
7000000570.a:SRS051882_Baylor_scaffold_3113	47.1721	0.669537	1	0.6695
7000000352.a:C3382929	47.1007	0.793859	1	0.7939
7000000429.a:SRS045645_Baylor_scaffold_10640	47	0.13296	0.329123	0.404
7000000262.a:SRS047044_WUGC_scaffold_10544	46.7515	0.451552	0.833612	0.5417
7000000171.a:SRS052697_LANL_scaffold_74265	46.3117	0.618764	0.993652	0.6227
7000000715.a:C1655542	46.2312	0.254924	0.483908	0.5268
7000000111.a:SRS019601_WUGC_scaffold_48716	46.2046	0.790089	0.999957	0.7901
7000000308.a:SRS058770_LANL_scaffold_39961	46.1481	0.357744	0.616817	0.58
7000000401.a:C3191677	46.0343	0.540029	0.977433	0.5525
7000000397.a:SRS011586_WUGC_scaffold_935	45.8712	0.962831	1	0.9628
7000000352.a:SRS014923_WUGC_scaffold_15552	45.6144	0.996672	1	0.9967
7000000191.a:C3073147	45.5835	0.430574	0.805588	0.5345
7000000289.a:SRS024331_LANL_scaffold_43108	45.4428	0.383624	0.82032	0.4677
7000000532.a:SRS011529_WUGC_scaffold_14016	45.4159	0.643715	0.995658	0.6465
7000000373.a:SRS016989_Baylor_scaffold_21089	45.2419	0.2305	0.643872	0.358
7000000075.a:C1204123	45	0.314112	0.561641	0.5593
7000000735.a:SRS015190_WUGC_scaffold_1890	44.8604	0.378524	0.999302	0.3788
7000000624.a:SRS024435_LANL_scaffold_33615	44.7675	0.538509	0.792943	0.6791
7000000486.a:SRS015264_WUGC_scaffold_69769	44.6708	0.465384	0.907759	0.5127
7000000433.a:SRS050752_LANL_scaffold_28795	44.5244	0.533309	0.925602	0.5762
7000000417.a:SRS011239_Baylor_scaffold_28983	44.4382	0.327257	0.545429	0.6
7000000272.a:C1593687	44.2768	0.410788	0.887905	0.4626
7000000302.a:SRS023914_Baylor_scaffold_28096	44.1988	0.745381	0.966686	0.7711
7000000410.a:SRS019030_Baylor_scaffold_18562	44.1163	0.235699	0.750043	0.3142
7000000333.a:SRS050925_LANL_scaffold_73295	44	0.11871	0.352217	0.337
7000000184.a:SRS016954_Baylor_scaffold_31634	43.9464	0.513231	0.994097	0.5163
7000000188.a:SRS053398_LANL_scaffold_43456	43.7794	0.449836	0.92812	0.4847
7000000142.a:SRS016753_Baylor_scaffold_781	43.7349	0.305367	0.681881	0.4478
7000000297.a:SRS056259_LANL_scaffold_29087	43.6388	0.55893	0.999219	0.5594
7000000455.a:C5191864	43.6009	0.72825	0.968226	0.7521
7000000333.a:SRS050925_LANL_scaffold_34226	43.4017	0.36829	0.758929	0.4853
7000000317.a:C2697711	43.3693	0.355902	0.813516	0.4375
7000000332.a:SRS015133_WUGC_scaffold_42997	43.2734	0.213685	0.569668	0.3751
7000000401.a:C3191487	43.2512	0.821016	1	0.821
7000000460.a:SRS051031_LANL_scaffold_50634	43.1946	0.999818	1	0.9998
7000000526.a:SRS019397_WUGC_scaffold_31672	43.0572	0.41054	0.852265	0.4817
7000000526.a:C1476727	43	0.159343	0.438676	0.3632
7000000481.a:SRS047014_WUGC_scaffold_29806	43	0.122655	0.346674	0.3538
7000000475.a:SRS020328_Baylor_scaffold_37397	42.929	0.997671	1	0.9977
7000000142.a:SRS016753_Baylor_scaffold_11431	42.7526	0.210641	0.565614	0.3724
7000000633.a:SRS015065_WUGC_scaffold_34200	42.5242	0.256996	0.720407	0.3567
7000000385.a:SRS017433_Baylor_scaffold_18739	42.5065	0.368001	0.578196	0.6365
7000000006.a:SRS054956_LANL_scaffold_14260	42	0.10004	0.218066	0.4588
7000000526.a:SRS019397_WUGC_scaffold_13411	41.9222	0.502529	0.916918	0.5481
7000000397.a:SRS011586_WUGC_scaffold_928	41.8557	0.998743	1	0.9987
7000000302.a:SRS023914_Baylor_scaffold_33737	41.8254	0.345515	0.884597	0.3906
7000000352.a:SRS014923_WUGC_scaffold_3972	41.8062	0.413413	0.956397	0.4323
7000000213.a:SRS011405_WUGC_scaffold_26356	41.7323	0.254588	0.566825	0.4491
7000000633.a:SRS015065_WUGC_scaffold_34940	41.6636	0.769868	0.99649	0.7726
7000000045.a:SRS013687_Baylor_scaffold_58619	41.4917	0.16918	0.422894	0.4001
7000000188.a:SRS053398_LANL_scaffold_2210	41.3844	0.133364	0.359736	0.3707
7000000071.a:SRS065504_LANL_scaffold_38513	41.2632	0.25	0.63791	0.3919
7000000317.a:SRS014459_WUGC_scaffold_51356	41.1195	0.91159	0.998738	0.9127
7000000171.a:SRS052697_LANL_scaffold_50385	41.0704	0.428257	0.7059	0.6067
7000000659.a:SRS015854_WUGC_scaffold_39550	41	0.435167	0.758143	0.574
7000000736.a:SRS014235_WUGC_scaffold_61125	41	0.570993	0.882494	0.647
7000000243.a:C4025868	41	0.151814	0.414848	0.366
7000000186.a:SRS022524_Baylor_scaffold_63178	41	0.630359	0.839591	0.7508
7000000081.a:SRS017307_Baylor_scaffold_32578	40.9208	0.557528	0.84065	0.6632
7000000045.a:SRS013687_Baylor_scaffold_46555	40.7356	0.513815	0.946063	0.5431
7000000006.a:SRS054956_LANL_scaffold_14393	40.6605	0.522054	0.997021	0.5236
7000000011.a:SRS053214_LANL_scaffold_26478	40.2876	0.403015	0.845595	0.4766
7000000200.a:SRS023526_Baylor_scaffold_19095	40.2596	0.805231	0.988707	0.8144
7000000032.a:SRS024132_Baylor_scaffold_36807	40.1096	0.808209	0.999994	0.8082
7000000425.a:C3134482	40.1096	0.808209	0.999994	0.8082
7000000444.a:SRS063985_LANL_scaffold_27186	40.0462	0.267361	0.547596	0.4882
7000000380.a:C3132616	40	0.255517	0.500553	0.5105
7000000112.a:SRS011302_Baylor_scaffold_12538	39.979	0.99938	1	0.9994
7000000087.a:C2385170	39.9672	0.485354	0.969067	0.5008
7000000740.a:SRS064276_LANL_scaffold_59704	39.9609	0.148104	0.473707	0.3126
7000000570.a:C2595401	39.9274	0.662738	0.949109	0.6983
7000000145.a:C2863755	39.7902	0.605713	0.992433	0.6103
7000000628.a:SRS015782_WUGC_scaffold_8197	39.7565	0.421122	0.770483	0.5466
7000000171.a:SRS052697_LANL_scaffold_39458	39.7349	0.110387	0.342042	0.3227
7000000308.a:SRS058770_LANL_scaffold_3823	39.3971	0.580056	0.968136	0.5991
7000000107.a:SRS042628_WUGC_scaffold_10193	39.3445	0.23508	0.750645	0.3132
7000000317.a:C2700717	39.0052	0.715015	0.995519	0.7182
7000000187.a:SRS022609_Baylor_scaffold_57879	38.3599	0.132689	0.34479	0.3848
7000000232.a:SRS015578_WUGC_scaffold_49577	38.2597	0.449534	0.795577	0.565
7000000192.a:SRS017821_Baylor_scaffold_11510	38.0337	0.984521	1	0.9845
7000000659.a:C5545944	38	0.329581	0.740296	0.4452
7000000107.a:SRS042628_WUGC_scaffold_3415	37.755	0.59163	0.979501	0.604
7000000111.a:SRS019601_WUGC_scaffold_46695	37.7354	0.746829	0.967308	0.7721
7000000521.a:SRS023583_Baylor_scaffold_11310	37.7025	0.161533	0.493733	0.3272
7000000069.a:SRS016095_WUGC_scaffold_9023	37.5756	0.36696	0.887697	0.4134
7000000334.a:SRS015217_WUGC_scaffold_36991	37.5741	0.289243	0.59733	0.4842
7000000302.a:SRS023914_Baylor_scaffold_30281	37.4096	0.206225	0.631826	0.3264
7000000433.a:SRS050752_LANL_scaffold_24340	37.3587	0.346896	0.851804	0.4072
7000000289.a:SRS024331_LANL_scaffold_48156	37.0201	0.23308	0.70028	0.3328
7000000296.a:SRS024009_Baylor_scaffold_5004	37.0029	0.261577	0.819283	0.3193
7000000429.a:C2072217	37	0.230834	0.389587	0.5925
7000000040.a:C1641951	36.9264	0.785032	0.975721	0.8046
7000000434.a:SRS014287_WUGC_scaffold_38530	36.7514	0.400474	0.856112	0.4678
7000000475.a:SRS020328_Baylor_scaffold_22653	36.6852	0.330797	0.811679	0.4075
7000000401.a:SRS011271_WUGC_scaffold_5567	36.6253	0.376872	0.73046	0.5159
7000000232.a:SRS015578_WUGC_scaffold_14706	36.5772	0.163214	0.440499	0.3705
7000000077.a:SRS064645_LANL_scaffold_2444	36.5676	0.396211	0.859521	0.461
7000000158.a:SRS014979_WUGC_scaffold_8813	36.5616	0.147856	0.312689	0.4729
7000000112.a:SRS011302_Baylor_scaffold_24703	36.3067	0.735087	0.999031	0.7358
7000000188.a:SRS053398_LANL_scaffold_30498	36.2344	0.266923	0.654162	0.408
7000000736.a:SRS014235_WUGC_scaffold_73409	36.1758	0.213304	0.614531	0.3471
7000000659.a:C5547346	36.0991	0.417031	0.910122	0.4582
7000000532.a:SRS011529_WUGC_scaffold_13783	36.0087	0.772417	0.999969	0.7724
7000000401.a:SRS011271_WUGC_scaffold_1361	36.0083	0.303331	0.713156	0.4253
7000000087.a:C2384940	35.9118	0.672144	1	0.6721
7000000385.a:SRS017433_Baylor_scaffold_3382	35.8848	0.312583	0.70623	0.4426
7000000526.a:SRS019397_WUGC_scaffold_31753	35.8642	0.231855	0.657875	0.3524
7000000271.a:SRS053335_LANL_scaffold_2330	35.694	0.463986	0.919724	0.5045
7000000296.a:C1829446	35.6039	0.688511	0.967844	0.7114
7000000213.a:C3691715	35.5779	0.441802	0.761365	0.5803
7000000032.a:SRS024132_Baylor_scaffold_35916	35.5	0.28956	0.7752	0.3735
7000000302.a:SRS023914_Baylor_scaffold_23746	35.303	0.510057	0.982654	0.5191
7000000231.a:SRS014613_WUGC_scaffold_2800	35.149	0.473835	0.993691	0.4768
7000000258.a:SRS016335_WUGC_scaffold_44376	35.1364	0.778425	0.967273	0.8048
7000000231.a:SRS014613_WUGC_scaffold_33953	35.1261	0.172396	0.390032	0.442
7000000609.a:SRS056519_LANL_scaffold_7946	35.1227	0.380192	0.703468	0.5405
7000000433.a:SRS050752_LANL_scaffold_32600	35.1227	0.519911	0.815058	0.6379
7000000736.a:SRS014235_WUGC_scaffold_31575	35.075	0.525154	0.930696	0.5643
7000000300.a:SRS043701_LANL_scaffold_3655	34.99	0.75567	1	0.7557
7000000077.a:C470268	34.9441	0.491424	0.882891	0.5566
7000000486.a:SRS015264_WUGC_scaffold_29242	34.8438	0.854914	1	0.8549
7000000289.a:SRS024331_LANL_scaffold_32242	34.7641	0.364064	0.902384	0.4034
7000000071.a:SRS065504_LANL_scaffold_45106	34.7573	0.455117	0.935499	0.4865
7000000071.a:SRS065504_LANL_scaffold_50919	34.6475	0.479304	0.909182	0.5272
7000000370.a:SRS017191_Baylor_scaffold_189	34.5932	0.204435	0.387533	0.5275
7000000526.a:SRS019397_WUGC_scaffold_30191	34.5707	0.436853	0.833277	0.5243
7000000407.a:SRS019267_WUGC_scaffold_15187	34.5309	0.210823	0.605957	0.3479
7000000087.a:C2384538	34.4315	0.412842	0.727312	0.5676
7000000334.a:SRS015217_WUGC_scaffold_14508	34.286	0.613313	0.999989	0.6133
7000000484.a:SRS016018_WUGC_scaffold_16697	34.2818	0.180694	0.565707	0.3194
7000000296.a:C1830654	34.228	0.588694	0.982806	0.599
3300003146.a:Ga0051080_1006611	34.1507	0.378439	0.709559	0.5333
7000000499.a:SRS016267_WUGC_scaffold_25464	34.1022	0.686805	0.99661	0.6891
7000000081.a:SRS017307_Baylor_scaffold_33480	34.0911	0.238188	0.567487	0.4197
7000000655.a:SRS019968_Baylor_scaffold_26787	34.0447	0.699918	0.980153	0.7141
7000000093.a:SRS022137_LANL_scaffold_13705	34.0443	0.85523	1	0.8552
3300003155.a:Ga0052270_10012109	34	0.256865	0.504417	0.5092
3300003140.a:Ga0051081_1006518	33.7062	0.365943	0.734342	0.4983
7000000516.a:C2640542	33.5707	0.209355	0.684501	0.3059
7000000715.a:SRS014683_WUGC_scaffold_51239	33.4166	0.294458	0.833876	0.3531
7000000334.a:C2389614	33.2854	0.479861	0.624637	0.7682
7000000526.a:SRS019397_WUGC_scaffold_23549	33.1453	0.164765	0.525723	0.3134
7000000172.a:SRS020869_Baylor_scaffold_8760	33.0977	0.275687	0.576702	0.478
7000000193.a:SRS048870_WUGC_scaffold_49190	32.9599	0.460146	0.990561	0.4645
7000000271.a:SRS053335_LANL_scaffold_8632	32.8702	0.712988	0.999894	0.7131
7000000094.a:SRS024549_LANL_scaffold_18643	32.8329	0.370683	0.702548	0.5276
7000000239.a:SRS013951_WUGC_scaffold_21099	32.655	0.314667	0.697873	0.4509
7000000289.a:SRS024331_LANL_scaffold_30418	32.544	0.344297	0.635897	0.5414
7000000684.a:SRS019582_WUGC_scaffold_57153	32.4262	0.109364	0.280942	0.3893
7000000317.a:SRS014459_WUGC_scaffold_95213	32.3208	0.232358	0.60358	0.385
7000000271.a:SRS053335_LANL_scaffold_28106	32.1148	0.671699	0.96897	0.6932
7000000239.a:SRS013951_WUGC_scaffold_8981	32.1117	0.222678	0.741013	0.3005
7000000081.a:C2526777	32.1004	0.24599	0.607929	0.4046
7000000081.a:C2526575	32.0426	0.427887	0.972724	0.4399
7000000158.a:SRS014979_WUGC_scaffold_3578	32	0.39592	0.671525	0.5896
7000000145.a:SRS050422_LANL_scaffold_93314	32	0.195676	0.39245	0.4986
7000000684.a:SRS019582_WUGC_scaffold_71208	31.9799	0.345488	0.779316	0.4433
7000000736.a:SRS014235_WUGC_scaffold_9343	31.798	0.777007	0.999546	0.7774
7000000069.a:SRS016095_WUGC_scaffold_10870	31.7301	0.40818	0.828746	0.4925
7000000193.a:SRS048870_WUGC_scaffold_38546	31.6015	0.369606	0.744331	0.4966
7000000570.a:SRS051882_Baylor_scaffold_24486	31.5547	0.19872	0.430957	0.4611
7000000460.a:SRS051031_LANL_scaffold_39958	31.4893	0.993301	1	0.9933
7000000045.a:SRS013687_Baylor_scaffold_58284	31.2553	0.530954	0.917894	0.5784
7000000333.a:SRS050925_LANL_scaffold_21160	31.0712	0.942827	1	0.9428
7000000444.a:SRS063985_LANL_scaffold_50521	31.0464	0.165079	0.52589	0.3139
7000000433.a:SRS050752_LANL_scaffold_32075	31.0382	0.314965	0.724252	0.4349
7000000107.a:C2756325	31.036	0.998609	1	0.9986
7000000272.a:SRS016203_WUGC_scaffold_8803	30.9948	0.715365	0.997128	0.7174
7000000289.a:SRS024331_LANL_scaffold_18524	30.9374	0.975089	0.999908	0.9752
7000000200.a:SRS023526_Baylor_scaffold_34564	30.9081	0.579083	0.895798	0.6464
7000000142.a:SRS016753_Baylor_scaffold_16227	30.8445	0.964084	1	0.9641
7000000032.a:C3922436	30.8263	0.485233	0.795894	0.6097
7000000232.a:SRS015578_WUGC_scaffold_37181	30.6894	0.270541	0.668112	0.4049
7000000417.a:SRS011239_Baylor_scaffold_29095	30.5795	0.995108	1	0.9951
7000000475.a:SRS020328_Baylor_scaffold_34917	30.5622	0.38808	0.875414	0.4433
7000000429.a:SRS045645_Baylor_scaffold_18668	30.4809	0.122764	0.355437	0.3454
7000000628.a:SRS015782_WUGC_scaffold_22286	30.4199	0.786437	0.950796	0.8271
7000000036.a:SRS049164_WUGC_scaffold_13311	30.4023	0.890228	0.999535	0.8906
7000000246.a:SRS078176_LANL_scaffold_28310	30.3446	0.355129	0.688443	0.5158
7000000352.a:SRS014923_WUGC_scaffold_58690	30.3328	0.316616	0.800633	0.3955
7000000158.a:SRS014979_WUGC_scaffold_18572	30.2893	0.644779	0.956844	0.6739
7000000320.a:SRS063040_Baylor_scaffold_1210	30.1241	0.552506	0.98997	0.5581
7000000302.a:SRS023914_Baylor_scaffold_9706	30.0075	0.155388	0.485099	0.3203
7000000633.a:SRS015065_WUGC_scaffold_39492	30	0.153558	0.352546	0.4356
7000000516.a:SRS019161_WUGC_scaffold_65593	30	0.310129	0.579144	0.5355
7000000417.a:SRS011239_Baylor_scaffold_10449	30	0.159086	0.458082	0.3473
7000000372.a:C3208994	29.9766	0.46623	0.909163	0.5128
7000000045.a:SRS013687_Baylor_scaffold_54183	29.8129	0.397159	0.91169	0.4356
7000000302.a:SRS023914_Baylor_scaffold_27312	29.8129	0.397159	0.91169	0.4356
3300000589.a:Draft_100005	29.7893	0.248115	0.623163	0.3982
7000000271.a:SRS053335_LANL_scaffold_31553	29.5393	0.295799	0.651662	0.4539
7000000484.a:C1316343	29.2532	0.331796	0.94202	0.3522
7000000492.a:SRS048164_WUGC_scaffold_9867	29	0.359402	0.775937	0.4632
7000000460.a:SRS051031_LANL_scaffold_36541	29	0.255034	0.6889	0.3702
7000000380.a:SRS015663_WUGC_scaffold_38268	29	0.165606	0.471141	0.3515
7000000531.a:SRS049959_WUGC_scaffold_28175	28.9456	0.186265	0.617543	0.3016
7000000646.a:SRS015960_WUGC_scaffold_7166	28.9429	0.250366	0.609218	0.411
7000000410.a:SRS019030_Baylor_scaffold_34574	28.9285	0.19781	0.476845	0.4148
7000000407.a:C3633282	28.879	0.25386	0.717645	0.3537
7000000306.a:SRS043001_WUGC_scaffold_44869	28.8479	0.558848	0.869736	0.6425
7000000429.a:C2068191	28.6343	0.517442	0.921822	0.5613
7000000093.a:SRS022137_LANL_scaffold_10104	28.6098	0.285845	0.628568	0.4548
7000000075.a:SRS016056_WUGC_scaffold_13569	28.5505	0.871669	1	0.8717
7000000317.a:SRS014459_WUGC_scaffold_95475	28.5432	0.250929	0.586088	0.4281
7000000075.a:SRS016056_WUGC_scaffold_1464	28.5137	0.998929	1	0.9989
7000000187.a:SRS022609_Baylor_scaffold_86898	28.4827	0.168247	0.3721	0.4522
7000000200.a:SRS023526_Baylor_scaffold_32654	28.3659	0.591564	0.999998	0.5916
7000000401.a:SRS011271_WUGC_scaffold_34346	28.3659	0.591564	0.999998	0.5916
7000000372.a:SRS045713_WUGC_scaffold_3959	28.2487	0.870685	1	0.8707
7000000262.a:SRS047044_WUGC_scaffold_28283	28.2354	0.265504	0.657416	0.4039
7000000434.a:SRS014287_WUGC_scaffold_14223	28.2313	0.587227	0.993002	0.5914
7000000434.a:SRS014287_WUGC_scaffold_25417	28.2276	0.779386	0.999931	0.7794
7000000192.a:C2498336	28.0747	0.776378	0.951598	0.8159
7000000302.a:SRS023914_Baylor_scaffold_33088	28.0169	0.502799	0.712551	0.7056
3300003146.a:Ga0051080_1005059	28	0.259586	0.504124	0.5149
7000000441.a:C2326996	28	0.203704	0.482089	0.4225
7000000624.a:SRS024435_LANL_scaffold_27143	27.8516	0.212726	0.423826	0.5019
7000000475.a:SRS020328_Baylor_scaffold_1745	27.842	0.654555	0.992424	0.6596
7000000184.a:C2864449	27.7629	0.660753	0.987938	0.6688
7000000265.a:C2881719	27.7183	0.667176	0.996877	0.6693
7000000641.a:SRS018351_Baylor_scaffold_31785	27.7003	0.106381	0.246942	0.4308
7000000188.a:SRS053398_LANL_scaffold_7277	27.661	0.227896	0.590076	0.3862
7000000429.a:C2070721	27.561	0.935788	0.999789	0.936
7000000192.a:C2494558	27.5568	0.378559	0.939816	0.4028
7000000108.a:C2493864	27.5264	0.325955	0.796011	0.4095
7000000100.a:SRS018817_WUGC_scaffold_24206	27.4693	0.559368	0.999982	0.5594
7000000032.a:SRS024132_Baylor_scaffold_12332	27.4608	0.3371	0.816287	0.413
7000000464.a:C1469436	27.3723	0.408766	0.81835	0.4995
7000000736.a:C3555019	27.2604	0.897691	0.997559	0.8999
7000000145.a:SRS050422_LANL_scaffold_79493	27.112	0.399743	0.85179	0.4693
7000000373.a:C1614031	27.0224	0.1959	0.568093	0.3448
7000000380.a:SRS015663_WUGC_scaffold_46672	27	0.314658	0.602375	0.5224
7000000187.a:SRS022609_Baylor_scaffold_11557	26.9858	0.298435	0.655636	0.4552
7000000516.a:SRS019161_WUGC_scaffold_33698	26.8034	0.105222	0.264684	0.3975
7000000081.a:SRS017307_Baylor_scaffold_27586	26.7842	0.338174	0.762555	0.4435
7000000401.a:C3194985	26.778	0.121926	0.36142	0.3374
7000000549.a:C1584946	26.7414	0.739002	0.991264	0.7455
7000000515.a:SRS049995_LANL_scaffold_14823	26.7173	0.401697	0.722371	0.5561
7000000372.a:SRS045713_WUGC_scaffold_39964	26.7164	0.437854	0.826426	0.5298
7000000188.a:SRS053398_LANL_scaffold_46385	26.7005	0.843059	0.997259	0.8454
7000000484.a:SRS016018_WUGC_scaffold_24808	26.6107	0.437341	0.742194	0.5893
7000000526.a:SRS019397_WUGC_scaffold_31262	26.5695	0.674046	0.972714	0.693
7000000641.a:SRS018351_Baylor_scaffold_4457	26.5135	0.870378	0.999018	0.8712
7000000641.a:SRS018351_Baylor_scaffold_28200	26.4889	0.492315	0.87151	0.5649
7000000297.a:SRS056259_LANL_scaffold_54948	26.4616	0.343586	0.925467	0.3713
7000000669.a:SRS022713_LANL_scaffold_23529	26.3098	0.35836	0.656975	0.5455
7000000158.a:SRS014979_WUGC_scaffold_34530	26.2955	0.43022	0.745628	0.577
7000000373.a:SRS016989_Baylor_scaffold_21698	26.2522	0.157525	0.336146	0.4686
7000000022.a:SRS011452_WUGC_scaffold_3183	26.0312	0.919773	0.999981	0.9198
7000000695.a:SRS049900_LANL_scaffold_17222	26.0082	0.378052	0.729075	0.5185
7000000498.a:SRS017521_Baylor_scaffold_10410	26	0.135542	0.282469	0.4798
7000000735.a:C1342355	26	0.296164	0.602519	0.4915
7000000271.a:SRS053335_LANL_scaffold_22231	26	0.135627	0.420681	0.3224
7000000200.a:SRS023526_Baylor_scaffold_35308	25.8496	0.425102	0.975438	0.4358
3300003140.a:Ga0051081_1003926	25.7961	0.55209	0.686242	0.8045
7000000038.a:C4277309	25.7438	0.319062	0.798051	0.3998
7000000111.a:SRS019601_WUGC_scaffold_31950	25.7125	0.594938	0.943855	0.6303
7000000433.a:SRS050752_LANL_scaffold_275	25.6469	0.868767	0.998324	0.8702
7000000490.a:C1877075	25.604	0.351006	0.794301	0.4419
7000000526.a:SRS019397_WUGC_scaffold_25998	25.4662	0.319833	0.573481	0.5577
7000000112.a:SRS011302_Baylor_scaffold_18748	25.4379	0.900776	1	0.9008
7000000239.a:SRS013951_WUGC_scaffold_61504	25.4364	0.291964	0.583027	0.5008
7000000012.a:SRS018313_Baylor_scaffold_15519	25.4052	0.260235	0.786785	0.3308
7000000262.a:SRS047044_WUGC_scaffold_17024	25.36	0.573924	0.970288	0.5915
7000000333.a:SRS050925_LANL_scaffold_66715	25.3551	0.662487	0.995281	0.6656
7000000385.a:SRS017433_Baylor_scaffold_5006	25.311	0.545966	0.999967	0.546
7000000628.a:SRS015782_WUGC_scaffold_3450	25.3059	0.296772	0.634636	0.4676
7000000531.a:SRS049959_WUGC_scaffold_58606	25.2543	0.174777	0.30943	0.5648
7000000038.a:C4276967	25.2532	0.292037	0.8202	0.3561
7000000107.a:SRS042628_WUGC_scaffold_22652	25.2332	0.13869	0.354793	0.3909
7000000100.a:SRS018817_WUGC_scaffold_28234	25.0857	0.447426	0.986816	0.4534
7000000093.a:C1839549	25	0.263256	0.620188	0.4245
7000000145.a:SRS050422_LANL_scaffold_89999	25	0.109602	0.284056	0.3858
3300003125.a:Ga0052232_100862	25	0.170827	0.330504	0.5169
7000000521.a:SRS023583_Baylor_scaffold_1032	24.9573	0.664799	0.969143	0.686
7000000740.a:SRS064276_LANL_scaffold_29043	24.9463	0.910385	1	0.9104
7000000407.a:SRS019267_WUGC_scaffold_20499	24.9355	0.419868	0.962336	0.4363
7000000178.a:SRS017247_LANL_scaffold_15920	24.9282	0.202591	0.401275	0.5049
7000000333.a:SRS050925_LANL_scaffold_42130	24.8953	0.120376	0.365031	0.3298
7000000498.a:SRS017521_Baylor_scaffold_41320	24.7602	0.259134	0.603872	0.4291
7000000252.a:C2208984	24.5541	0.267969	0.845917	0.3168
7000000278.a:C4653273	24.4362	0.712411	0.996418	0.715
7000000418.a:C3798363	24.3572	0.191668	0.40644	0.4716
7000000484.a:SRS016018_WUGC_scaffold_16442	24.3502	0.112994	0.27945	0.4043
7000000271.a:SRS053335_LANL_scaffold_31252	24.3232	0.341895	0.557361	0.6134
7000000628.a:SRS015782_WUGC_scaffold_29404	24.3009	0.330524	0.872457	0.3788
7000000193.a:SRS048870_WUGC_scaffold_8930	24.2895	0.275683	0.681522	0.4045
7000000444.a:SRS063985_LANL_scaffold_25379	24.1102	0.256037	0.558349	0.4586
7000000071.a:SRS065504_LANL_scaffold_57310	24.0907	0.363317	0.737501	0.4926
7000000538.a:C1598091	24.0138	0.374194	0.687853	0.544
7000000441.a:SRS015794_Baylor_scaffold_17960	23.9643	0.159265	0.388519	0.4099
7000000252.a:C2206190	23.9377	0.272403	0.715144	0.3809
7000000684.a:SRS019582_WUGC_scaffold_55899	23.9121	0.483705	0.977876	0.4946
7000000297.a:SRS056259_LANL_scaffold_11697	23.805	0.998979	1	0.999
7000000333.a:SRS050925_LANL_scaffold_21661	23.7887	0.11714	0.352028	0.3328
7000000111.a:SRS019601_WUGC_scaffold_6393	23.6054	0.500248	0.999835	0.5003
7000000111.a:SRS019601_WUGC_scaffold_2156	23.5292	0.556751	0.860157	0.6473
7000000317.a:C2697063	23.4197	0.421061	0.698436	0.6029
7000000186.a:SRS022524_Baylor_scaffold_75256	23.4131	0.434095	0.953584	0.4552
7000000112.a:SRS011302_Baylor_scaffold_14176	23.3574	0.431533	0.700816	0.6158
7000000231.a:SRS014613_WUGC_scaffold_11741	23.3234	0.994083	1	0.9941
7000000516.a:SRS019161_WUGC_scaffold_61227	23.2338	0.103962	0.226225	0.4595
7000000329.a:SRS016495_LANL_scaffold_13971	23.1296	0.800149	0.997548	0.8021
7000000531.a:C3986182	23.0826	0.689755	0.992947	0.6947
7000000475.a:SRS020328_Baylor_scaffold_20012	23	0.104955	0.20067	0.523
7000000684.a:SRS019582_WUGC_scaffold_92928	22.8946	0.525821	0.998555	0.5266
7000000464.a:SRS077730_LANL_scaffold_23497	22.8138	0.37744	0.796903	0.4736
7000000736.a:SRS014235_WUGC_scaffold_72295	22.7945	0.123951	0.339965	0.3646
7000000145.a:SRS050422_LANL_scaffold_50261	22.7237	0.367647	0.753643	0.4878
7000000317.a:SRS014459_WUGC_scaffold_28345	22.5073	0.208914	0.546496	0.3823
7000000231.a:SRS014613_WUGC_scaffold_27073	22.4874	0.171698	0.498435	0.3445
7000000570.a:SRS051882_Baylor_scaffold_2043	22.3384	0.176697	0.491707	0.3594
7000000570.a:SRS051882_Baylor_scaffold_14761	22.3222	0.208889	0.575	0.3633
7000000100.a:SRS018817_WUGC_scaffold_10655	22.2056	0.274236	0.555632	0.4936
7000000036.a:C2521426	22.1481	0.346659	0.832282	0.4165
7000000624.a:SRS024435_LANL_scaffold_16411	22.0938	0.864071	1	0.8641
7000000262.a:SRS047044_WUGC_scaffold_30089	22.034	0.722849	0.932794	0.7749
7000000641.a:SRS018351_Baylor_scaffold_29898	22	0.13978	0.379537	0.3683
7000000655.a:SRS019968_Baylor_scaffold_26247	22	0.120293	0.335145	0.3589
7000000444.a:SRS063985_LANL_scaffold_57029	22	0.162635	0.359492	0.4524
7000000582.a:SRS019787_WUGC_scaffold_26282	22	0.139068	0.363917	0.3821
7000000418.a:SRS012273_Baylor_scaffold_29382	21.8621	0.366518	0.992017	0.3695
7000000334.a:SRS015217_WUGC_scaffold_13989	21.7533	0.101824	0.266161	0.3826
7000000243.a:SRS045004_LANL_scaffold_34514	21.5638	0.174212	0.368162	0.4732
7000000429.a:SRS045645_Baylor_scaffold_12498	21.5446	0.140151	0.433532	0.3233
7000000579.a:SRS017103_Baylor_scaffold_2643	21.5327	0.37433	0.727363	0.5146
7000000460.a:SRS051031_LANL_scaffold_69379	21.5121	0.420554	0.635969	0.6613
7000000401.a:SRS011271_WUGC_scaffold_40435	21.5117	0.61032	0.869325	0.7021
7000000570.a:C2595871	21.3876	0.244389	0.664581	0.3677
7000000011.a:SRS053214_LANL_scaffold_27249	21.255	0.227915	0.601384	0.379
7000000526.a:SRS019397_WUGC_scaffold_31587	21.2326	0.231857	0.623429	0.3719
7000000200.a:SRS023526_Baylor_scaffold_29697	21.2204	0.24366	0.487368	0.4999
7000000200.a:SRS023526_Baylor_scaffold_18117	21.2071	0.253492	0.604277	0.4195
7000000188.a:C2348361	21.2008	0.299139	0.554514	0.5395
7000000407.a:SRS019267_WUGC_scaffold_3426	21.0596	0.465917	0.986404	0.4723
7000000370.a:SRS017191_Baylor_scaffold_16298	21.0447	0.433367	0.94713	0.4576
7000000131.a:SRS057717_LANL_scaffold_18017	21	0.551269	0.695396	0.7927
7000000045.a:SRS013687_Baylor_scaffold_20620	21	0.112395	0.26912	0.4176
7000000296.a:C1829136	21	0.137954	0.448845	0.3074
7000000232.a:SRS015578_WUGC_scaffold_43146	21	0.162861	0.377177	0.4318
7000000352.a:C3383345	20.9941	0.224211	0.358151	0.626
7000000579.a:SRS017103_Baylor_scaffold_5567	20.9906	0.57846	0.981653	0.5893
7000000174.a:C7614557	20.9233	0.224238	0.427606	0.5244
7000000265.a:C2882543	20.8539	0.48863	0.779783	0.6266
7000000191.a:C3072743	20.847	0.166019	0.545061	0.3046
7000000464.a:SRS077730_LANL_scaffold_8388	20.8195	0.52478	0.999118	0.5252
7000000171.a:C3376773	20.7081	0.117083	0.361882	0.3235
7000000087.a:C2385188	20.6533	0.546901	0.953345	0.5737
7000000490.a:C1873301	20.6381	0.581713	0.952246	0.6109
7000000526.a:SRS019397_WUGC_scaffold_20864	20.4413	0.225373	0.561036	0.4017
7000000715.a:SRS014683_WUGC_scaffold_25597	20.3038	0.258866	0.641923	0.4033
7000000022.a:SRS011452_WUGC_scaffold_16370	20.2526	0.123672	0.38206	0.3237
7000000333.a:SRS050925_LANL_scaffold_4572	20.2269	0.672642	0.999995	0.6726
7000000684.a:SRS019582_WUGC_scaffold_1909	20.1652	0.691657	0.966903	0.7153
7000000191.a:C3067519	20.1195	0.736348	0.991553	0.7426
7000000098.a:SRS023176_Baylor_scaffold_12944	20	0.103125	0.282464	0.3651
7000000464.a:SRS077730_LANL_scaffold_21724	20	0.179986	0.243767	0.7384
7000000417.a:SRS011239_Baylor_scaffold_4488	19.9145	0.952135	1	0.9521
7000000011.a:SRS053214_LANL_scaffold_7507	19.8127	0.377127	0.873747	0.4316
7000000094.a:SRS024549_LANL_scaffold_4916	19.6791	0.665106	0.999979	0.6651
7000000334.a:SRS015217_WUGC_scaffold_20283	19.664	0.989003	1	0.989
7000000492.a:SRS048164_WUGC_scaffold_12104	19.4918	0.330311	0.681083	0.485
7000000038.a:C4272154	19.4913	0.27967	0.754638	0.3706
3300003155.a:Ga0052270_10011341	19.4871	0.332378	0.715433	0.4646
7000000735.a:SRS015190_WUGC_scaffold_13284	19.3614	0.245047	0.669134	0.3662
7000000579.a:SRS017103_Baylor_scaffold_90	19.3486	0.201888	0.665991	0.3031
7000000300.a:SRS043701_LANL_scaffold_30217	19.2927	0.273006	0.76526	0.3567
7000000297.a:SRS056259_LANL_scaffold_7242	19.152	0.486504	0.999835	0.4866
7000000418.a:SRS012273_Baylor_scaffold_6350	19	0.315878	0.479463	0.6588
7000000531.a:C3985590	19	0.320046	0.521052	0.6142
7000000418.a:SRS012273_Baylor_scaffold_35153	18.9825	0.391375	0.79031	0.4952
7000000317.a:C2699781	18.9453	0.788828	0.977912	0.8066
7000000112.a:SRS011302_Baylor_scaffold_24263	18.844	0.199908	0.468611	0.4266
7000000297.a:SRS056259_LANL_scaffold_20335	18.7796	0.288986	0.84113	0.3436
7000000193.a:SRS048870_WUGC_scaffold_50634	18.6978	0.194639	0.383495	0.5075
7000000372.a:SRS045713_WUGC_scaffold_42195	18.646	0.157006	0.390479	0.4021
7000000628.a:SRS015782_WUGC_scaffold_32577	18.6258	0.128843	0.383858	0.3357
7000000081.a:SRS017307_Baylor_scaffold_6587	18.6065	0.379251	0.602444	0.6295
7000000131.a:SRS057717_LANL_scaffold_17935	18.472	0.268499	0.606691	0.4426
7000000410.a:SRS019030_Baylor_scaffold_25174	18.396	0.425297	0.715987	0.594
7000000661.a:SRS052027_LANL_scaffold_64	18.2958	0.999806	1	0.9998
7000000111.a:SRS019601_WUGC_scaffold_6864	18.2403	0.131476	0.286025	0.4597
7000000045.a:SRS013687_Baylor_scaffold_59607	18.2366	0.226075	0.349965	0.646
7000000192.a:SRS017821_Baylor_scaffold_25048	18.1158	0.610149	0.965924	0.6317
7000000032.a:SRS024132_Baylor_scaffold_31646	18.0783	0.339136	0.686247	0.4942
7000000370.a:SRS017191_Baylor_scaffold_9720	18	0.193567	0.352703	0.5488
7000000498.a:SRS017521_Baylor_scaffold_54115	18	0.223026	0.411045	0.5426
7000000087.a:C2384208	18	0.200635	0.426336	0.4706
7000000145.a:SRS050422_LANL_scaffold_32447	17.9493	0.188645	0.560897	0.3363
7000000172.a:SRS020869_Baylor_scaffold_12718	17.9369	0.707255	0.996179	0.71
7000000334.a:SRS015217_WUGC_scaffold_29141	17.922	0.292144	0.566576	0.5156
7000000239.a:SRS013951_WUGC_scaffold_6400	17.7494	0.118643	0.216185	0.5488
7000000006.a:SRS054956_LANL_scaffold_45793	17.7416	0.294585	0.450811	0.6535
7000000633.a:SRS015065_WUGC_scaffold_41496	17.6746	0.202282	0.384326	0.5263
7000000187.a:SRS022609_Baylor_scaffold_68866	17.4431	0.269711	0.667906	0.4038
7000000632.a:SRS050299_LANL_scaffold_14425	17.3915	0.106808	0.252944	0.4223
7000000370.a:SRS017191_Baylor_scaffold_10469	17.3477	0.995178	1	0.9952
7000000077.a:SRS064645_LANL_scaffold_6232	17.2976	0.199646	0.514488	0.388
7000000669.a:SRS022713_LANL_scaffold_7528	17.2843	0.556912	0.999847	0.557
7000000296.a:C1827385	17.2604	0.431759	0.674728	0.6399
7000000172.a:C3443772	17.2008	0.582745	0.915047	0.6368
7000000624.a:C3236958	17.1496	0.316662	0.82254	0.385
7000000515.a:SRS049995_LANL_scaffold_24424	17.0773	0.129821	0.40182	0.3231
7000000736.a:SRS014235_WUGC_scaffold_22059	17.0468	0.52033	0.815689	0.6379
7000000317.a:SRS014459_WUGC_scaffold_95766	17.0356	0.18085	0.408449	0.4428
7000000417.a:SRS011239_Baylor_scaffold_30119	17	0.288393	0.583165	0.4945
3300003146.a:Ga0051080_1003502	17	0.109596	0.294032	0.3727
7000000191.a:C3066951	17	0.288596	0.619035	0.4662
7000000740.a:SRS064276_LANL_scaffold_18823	17	0.171239	0.377468	0.4537
7000000538.a:SRS024075_LANL_scaffold_10956	16.9982	0.402697	0.960564	0.4192
7000000296.a:SRS024009_Baylor_scaffold_6249	16.9867	0.372562	0.947674	0.3931
7000000633.a:SRS015065_WUGC_scaffold_39366	16.9643	0.521818	0.928117	0.5622
7000000433.a:SRS050752_LANL_scaffold_11947	16.9457	0.49908	0.777116	0.6422
7000000193.a:SRS048870_WUGC_scaffold_38753	16.8872	0.323295	0.699659	0.4621
7000000740.a:SRS064276_LANL_scaffold_19707	16.8774	0.222559	0.725354	0.3068
7000000186.a:SRS022524_Baylor_scaffold_27158	16.8447	0.525576	0.883547	0.5948
7000000380.a:SRS015663_WUGC_scaffold_40995	16.7762	0.335807	0.500461	0.671
7000000646.a:SRS015960_WUGC_scaffold_30554	16.7729	0.14721	0.43281	0.3401
7000000271.a:SRS053335_LANL_scaffold_17822	16.6066	0.748952	0.962198	0.7784
7000000075.a:SRS016056_WUGC_scaffold_2661	16.5855	0.769152	0.959178	0.8019
7000000486.a:SRS015264_WUGC_scaffold_17419	16.4887	0.134031	0.309417	0.4332
7000000071.a:SRS065504_LANL_scaffold_44970	16.4395	0.299454	0.991678	0.302
7000000111.a:SRS019601_WUGC_scaffold_48233	16.4132	0.109902	0.229069	0.4798
7000000372.a:SRS045713_WUGC_scaffold_25073	16.4093	0.570898	0.999359	0.5713
7000000332.a:SRS015133_WUGC_scaffold_5206	16.3304	0.230455	0.524961	0.439
7000000192.a:C2496624	16.1729	0.25616	0.560476	0.457
7000000332.a:SRS015133_WUGC_scaffold_36904	16.0156	0.211521	0.595034	0.3555
7000000498.a:SRS017521_Baylor_scaffold_17378	16	0.106586	0.209937	0.5077
7000000410.a:SRS019030_Baylor_scaffold_7199	16	0.140734	0.319659	0.4403
7000000006.a:SRS054956_LANL_scaffold_45327	16	0.127208	0.3488	0.3647
7000000265.a:C2882667	15.8958	0.149172	0.362827	0.4111
7000000492.a:SRS048164_WUGC_scaffold_33739	15.6761	0.593785	0.964004	0.616
7000000628.a:SRS015782_WUGC_scaffold_34642	15.6658	0.552643	0.976736	0.5658
7000000006.a:SRS054956_LANL_scaffold_30248	15.5868	0.146757	0.430535	0.3409
7000000333.a:SRS050925_LANL_scaffold_62226	15.5353	0.318458	0.545316	0.584
7000000659.a:C5547146	15.5113	0.374271	0.964006	0.3882
7000000069.a:SRS016095_WUGC_scaffold_39600	15.4711	0.25876	0.652943	0.3963
7000000690.a:SRS055982_Baylor_scaffold_12018	15.3761	0.332125	0.676482	0.491
7000000006.a:SRS054956_LANL_scaffold_36467	15.3465	0.235671	0.675027	0.3491
7000000186.a:SRS022524_Baylor_scaffold_18063	15.3011	0.295603	0.636624	0.4643
7000000187.a:SRS022609_Baylor_scaffold_89137	15.2654	0.233967	0.373481	0.6264
7000000712.a:SRS057478_LANL_scaffold_14149	15.2028	0.641166	0.927743	0.6911
7000000531.a:SRS049959_WUGC_scaffold_27121	15.1889	0.388391	0.785161	0.4947
7000000380.a:SRS015663_WUGC_scaffold_3007	15.1718	0.163333	0.325587	0.5017
7000000633.a:SRS015065_WUGC_scaffold_8033	15.1045	0.18678	0.487201	0.3834
7000000736.a:SRS014235_WUGC_scaffold_69972	15.0398	0.652433	0.989931	0.6591
7000000464.a:SRS077730_LANL_scaffold_23674	15	0.214567	0.551819	0.3888
7000000385.a:C1840579	15	0.116985	0.339623	0.3445
7000000526.a:SRS019397_WUGC_scaffold_10964	14.9851	0.272893	0.668459	0.4082
7000000516.a:C2644291	14.9736	0.36249	0.721347	0.5025
7000000532.a:SRS011529_WUGC_scaffold_14582	14.9246	0.513407	0.874306	0.5872
7000000715.a:SRS014683_WUGC_scaffold_14693	14.8125	0.103109	0.242392	0.4254
7000000075.a:SRS016056_WUGC_scaffold_13002	14.8048	0.215844	0.55436	0.3894
7000000278.a:SRS018133_Baylor_scaffold_31686	14.7927	0.743947	0.986175	0.7544
7000000191.a:C3073572	14.7684	0.185975	0.387505	0.4799
7000000192.a:SRS017821_Baylor_scaffold_23917	14.7077	0.634565	0.968046	0.6555
7000000188.a:C2347875	14.6303	0.605188	1	0.6052
7000000484.a:SRS016018_WUGC_scaffold_18800	14.6276	0.368676	0.965171	0.382
7000000045.a:SRS013687_Baylor_scaffold_59644	14.3919	0.232788	0.406388	0.5728
7000000515.a:SRS049995_LANL_scaffold_21538	14.309	0.820455	0.999636	0.8208
7000000360.a:SRS016585_Baylor_scaffold_4329	14.263	0.125979	0.283755	0.444
7000000490.a:SRS013800_Baylor_scaffold_1112	14.2089	0.89205	1	0.8921
7000000193.a:SRS048870_WUGC_scaffold_15106	14.1457	0.240852	0.499721	0.482
7000000011.a:SRS053214_LANL_scaffold_9915	14.081	0.185347	0.411022	0.4509
7000000632.a:SRS050299_LANL_scaffold_12572	14.011	0.12575	0.272335	0.4617
7000000669.a:SRS022713_LANL_scaffold_26710	14	0.120312	0.23333	0.5156
7000000200.a:SRS023526_Baylor_scaffold_1575	13.7932	0.296421	0.586068	0.5058
7000000429.a:C2071249	13.7582	0.161968	0.503229	0.3219
7000000191.a:C3073331	13.7527	0.410908	0.710547	0.5783
7000000032.a:SRS024132_Baylor_scaffold_37363	13.7087	0.387457	0.562851	0.6884
7000000352.a:SRS014923_WUGC_scaffold_27424	13.6994	0.247428	0.522101	0.4739
7000000187.a:SRS022609_Baylor_scaffold_23433	13.6894	0.114295	0.353675	0.3232
7000000111.a:SRS019601_WUGC_scaffold_42922	13.6811	0.719621	0.970009	0.7419
7000000111.a:SRS019601_WUGC_scaffold_46715	13.6803	0.32175	0.606224	0.5307
7000000038.a:C4276709	13.6445	0.303237	0.622744	0.4869
7000000418.a:SRS012273_Baylor_scaffold_8590	13.6212	0.33058	0.66345	0.4983
7000000410.a:SRS019030_Baylor_scaffold_39474	13.5897	0.144258	0.262411	0.5497
7000000296.a:C1829082	13.5858	0.267138	0.72442	0.3688
7000000243.a:SRS045004_LANL_scaffold_20384	13.5177	0.260704	0.573135	0.4549
7000000231.a:SRS014613_WUGC_scaffold_7076	13.4615	0.319583	0.95956	0.3331
7000000302.a:SRS023914_Baylor_scaffold_33831	13.4234	0.255605	0.544956	0.469
7000000417.a:SRS011239_Baylor_scaffold_505	13.4124	0.197033	0.363929	0.5414
7000000352.a:SRS014923_WUGC_scaffold_58879	13.3356	0.19206	0.420132	0.4571
7000000317.a:SRS014459_WUGC_scaffold_60608	13.3171	0.133145	0.217524	0.6121
7000000262.a:SRS047044_WUGC_scaffold_2774	13.2714	0.447081	0.818227	0.5464
7000000633.a:C2482074	13.2399	0.200646	0.650698	0.3084
7000000329.a:SRS016495_LANL_scaffold_2726	13.2358	0.952478	0.99998	0.9525
7000000081.a:SRS017307_Baylor_scaffold_32950	13.228	0.218934	0.553597	0.3955
7000000181.a:SRS018656_WUGC_scaffold_1644	13.2073	0.212162	0.576196	0.3682
7000000486.a:SRS015264_WUGC_scaffold_13179	13.1365	0.484637	0.883532	0.5485
7000000655.a:SRS019968_Baylor_scaffold_4282	13.0576	0.387259	0.79507	0.4871
7000000475.a:SRS020328_Baylor_scaffold_10188	13.0446	0.197061	0.564252	0.3492
7000000385.a:SRS017433_Baylor_scaffold_989	13.0331	0.220515	0.394011	0.5597
7000000265.a:C2882851	13.0142	0.199965	0.34326	0.5825
7000000188.a:C2348073	13	0.10708	0.35618	0.3006
7000000218.a:SRS023829_Baylor_scaffold_16712	13	0.21492	0.404825	0.5309
3300003155.a:Ga0052270_10305463	13	0.343494	0.492666	0.6972
7000000609.a:SRS056519_LANL_scaffold_32078	13	0.291358	0.511785	0.5693
7000000498.a:SRS017521_Baylor_scaffold_15469	13	0.112762	0.361619	0.3118
7000000087.a:C2383996	12.9989	0.402708	0.584891	0.6885
7000000172.a:SRS020869_Baylor_scaffold_18816	12.9088	0.320715	0.958231	0.3347
7000000740.a:SRS064276_LANL_scaffold_35734	12.8844	0.740141	1	0.7401
7000000628.a:C3498135	12.88	0.307983	0.48385	0.6365
7000000232.a:SRS015578_WUGC_scaffold_37012	12.8729	0.317675	0.968431	0.328
7000000646.a:SRS015960_WUGC_scaffold_30066	12.7758	0.243843	0.547587	0.4453
3300003146.a:Ga0051080_1014626	12.6098	0.199563	0.369708	0.5398
7000000740.a:SRS064276_LANL_scaffold_65308	12.5147	0.214492	0.471713	0.4547
7000000433.a:SRS050752_LANL_scaffold_25295	12.4966	0.303524	0.986129	0.3078
7000000641.a:SRS018351_Baylor_scaffold_10421	12.4508	0.316815	0.58949	0.5374
7000000740.a:SRS064276_LANL_scaffold_34993	12.449	0.824373	0.998764	0.8254
7000000188.a:SRS053398_LANL_scaffold_7252	12.4474	0.906593	1	0.9066
7000000531.a:SRS049959_WUGC_scaffold_58889	12.4448	0.555973	0.873168	0.6367
7000000516.a:SRS019161_WUGC_scaffold_62502	12.4437	0.398319	0.610037	0.6529
7000000187.a:SRS022609_Baylor_scaffold_43683	12.2494	0.229332	0.397263	0.5773
7000000444.a:SRS063985_LANL_scaffold_27486	12.158	0.366146	0.703917	0.5202
7000000187.a:SRS022609_Baylor_scaffold_87617	12.147	0.28932	0.59597	0.4855
7000000186.a:SRS022524_Baylor_scaffold_76671	12.0795	0.51108	0.85312	0.5991
7000000186.a:SRS022524_Baylor_scaffold_5084	12.0556	0.969616	1	0.9696
7000000418.a:C3792460	12.0539	0.116541	0.346722	0.3361
7000000735.a:SRS015190_WUGC_scaffold_19149	12.0526	0.57462	0.997442	0.5761
7000000712.a:SRS057478_LANL_scaffold_5201	12.0462	0.446884	0.785845	0.5687
7000000546.a:SRS019910_WUGC_scaffold_54060	12.0269	0.969471	1	0.9695
7000000659.a:SRS015854_WUGC_scaffold_35050	12.0011	0.49483	0.643554	0.7689
7000000490.a:C1875089	12	0.170605	0.345123	0.4943
7000000464.a:SRS077730_LANL_scaffold_24503	12	0.100369	0.177181	0.5665
7000000690.a:SRS055982_Baylor_scaffold_16374	11.9598	0.715392	0.994875	0.7191
7000000094.a:C982364	11.9574	0.165755	0.30394	0.5454
7000000297.a:SRS056259_LANL_scaffold_43308	11.9302	0.322277	0.706185	0.4564
7000000036.a:SRS049164_WUGC_scaffold_4201	11.8429	0.164478	0.364462	0.4513
7000000633.a:SRS015065_WUGC_scaffold_39197	11.8221	0.156503	0.436707	0.3584
7000000669.a:SRS022713_LANL_scaffold_3154	11.7929	0.233296	0.738419	0.3159
7000000352.a:SRS014923_WUGC_scaffold_6443	11.7747	0.323447	0.646702	0.5001
7000000045.a:SRS013687_Baylor_scaffold_32297	11.7477	0.446852	0.970823	0.4603
7000000333.a:SRS050925_LANL_scaffold_73651	11.5607	0.191725	0.547168	0.3504
7000000418.a:C3800309	11.5595	0.143585	0.325448	0.4412
7000000038.a:C4270540	11.5526	0.19291	0.575829	0.335
7000000410.a:SRS019030_Baylor_scaffold_32140	11.5474	0.103081	0.242335	0.4254
7000000332.a:SRS015133_WUGC_scaffold_34758	11.4984	0.804037	0.985579	0.8158
7000000418.a:SRS012273_Baylor_scaffold_33626	11.482	0.183087	0.444444	0.4119
7000000200.a:SRS023526_Baylor_scaffold_29673	11.4532	0.59123	0.934952	0.6324
7000000178.a:SRS017247_LANL_scaffold_5873	11.4202	0.676364	0.995427	0.6795
7000000231.a:SRS014613_WUGC_scaffold_26281	11.4004	0.144653	0.324491	0.4458
7000000258.a:C5291849	11.3724	0.377043	0.807031	0.4672
7000000498.a:SRS017521_Baylor_scaffold_57364	11.3552	0.11107	0.255504	0.4347
7000000302.a:SRS023914_Baylor_scaffold_16486	11.3544	0.265057	0.804331	0.3295
7000000532.a:SRS011529_WUGC_scaffold_17557	11.3335	0.830153	0.997691	0.8321
7000000433.a:SRS050752_LANL_scaffold_38608	11.2554	0.527107	0.836598	0.6301
7000000715.a:SRS014683_WUGC_scaffold_8600	11.2389	0.999241	1	0.9992
7000000633.a:SRS015065_WUGC_scaffold_42082	11.1894	0.156241	0.298667	0.5231
7000000532.a:SRS011529_WUGC_scaffold_18079	11.0765	0.586537	0.940062	0.6239
7000000397.a:SRS011586_WUGC_scaffold_17969	11.0618	0.29702	0.728341	0.4078
7000000320.a:SRS063040_Baylor_scaffold_54797	11	0.144246	0.239412	0.6025
7000000006.a:SRS054956_LANL_scaffold_39049	10.9249	0.783005	0.973532	0.8043
7000000540.a:SRS023346_LANL_scaffold_2458	10.9033	0.486659	0.976273	0.4985
7000000434.a:SRS014287_WUGC_scaffold_30022	10.8738	0.663326	0.999558	0.6636
7000000540.a:SRS023346_LANL_scaffold_8800	10.8406	0.212497	0.678821	0.313
7000000107.a:SRS042628_WUGC_scaffold_20233	10.8389	0.135577	0.355118	0.3818
7000000410.a:SRS019030_Baylor_scaffold_15832	10.7739	0.998793	1	0.9988
7000000192.a:SRS017821_Baylor_scaffold_14895	10.7632	0.575951	0.936614	0.6149
7000000200.a:SRS023526_Baylor_scaffold_5493	10.7394	0.681261	0.999986	0.6813
7000000094.a:SRS024549_LANL_scaffold_11833	10.6951	0.257129	0.407496	0.631
7000000370.a:SRS017191_Baylor_scaffold_21101	10.692	0.299449	0.477141	0.6276
7000000171.a:SRS052697_LANL_scaffold_69835	10.6592	0.234914	0.400981	0.5858
7000000740.a:SRS064276_LANL_scaffold_71048	10.6549	0.156064	0.301877	0.517
7000000258.a:SRS016335_WUGC_scaffold_22616	10.6064	0.170351	0.366712	0.4645
7000000735.a:SRS015190_WUGC_scaffold_27270	10.6059	0.44186	0.966163	0.4573
7000000087.a:C2383988	10.5714	0.2707	0.522451	0.5181
7000000380.a:SRS015663_WUGC_scaffold_16964	10.5346	0.408273	0.770328	0.53
7000000531.a:SRS049959_WUGC_scaffold_59413	10.4515	0.510393	0.896351	0.5694
7000000193.a:SRS048870_WUGC_scaffold_41496	10.2987	0.215304	0.428459	0.5025
7000000418.a:C3792554	10.2012	0.473006	0.886057	0.5338
7000000145.a:SRS050422_LANL_scaffold_14614	10.2009	0.197897	0.405643	0.4879
7000000630.a:SRS062427_LANL_scaffold_553	10.1083	0.706808	1	0.7068
7000000641.a:SRS018351_Baylor_scaffold_7961	10.0777	0.309875	0.609639	0.5083
7000000045.a:C2654624	10.077	0.112295	0.368505	0.3047
7000000006.a:SRS054956_LANL_scaffold_28062	10	0.138523	0.258778	0.5353
7000000433.a:SRS050752_LANL_scaffold_27063	10	0.122658	0.172701	0.7102
7000000659.a:SRS015854_WUGC_scaffold_39400	10	0.148428	0.331705	0.4475

## Sheet: 2.Donor-sample2
#IMG/VR-ID	EstimatedAbundance	Support, Co	PredictedSupport, Ce	Ratio, R
7000000695.a:SRS049900_LANL_scaffold_14438	41339.4	1	1	1
7000000498.a:SRS017521_Baylor_scaffold_5189	32349.7	0.980523	1	0.9805
7000000334.a:SRS015217_WUGC_scaffold_5454	19934.6	1	1	1
7000000171.a:SRS052697_LANL_scaffold_25054	18152	1	1	1
7000000712.a:SRS057478_LANL_scaffold_16118	14427.5	0.899816	1	0.8998
7000000333.a:SRS050925_LANL_scaffold_16337	13702.9	0.999888	1	0.9999
7000000040.a:SRS043411_WUGC_scaffold_39395	12718.5	0.815005	1	0.815
7000000040.a:SRS043411_WUGC_scaffold_48710	10286	0.971695	1	0.9717
7000000735.a:SRS015190_WUGC_scaffold_21136	9812.61	0.809974	1	0.81
7000000300.a:SRS043701_LANL_scaffold_4863	9280.05	1	1	1
7000000628.a:SRS015782_WUGC_scaffold_14071	8923.7	0.968012	1	0.968
3300003155.a:Ga0052270_10307189	8735	0.926499	1	0.9265
7000000093.a:SRS022137_LANL_scaffold_29955	8577.86	0.996802	1	0.9968
7000000171.a:SRS052697_LANL_scaffold_35380	8331.42	0.989298	1	0.9893
7000000690.a:SRS055982_Baylor_scaffold_15154	8244.93	0.920168	1	0.9202
7000000486.a:SRS015264_WUGC_scaffold_9389	7724.49	0.530493	1	0.5305
7000000032.a:SRS024132_Baylor_scaffold_33940	7369.17	0.883938	1	0.8839
7000000434.a:SRS014287_WUGC_scaffold_21386	7164.82	0.868052	1	0.8681
7000000171.a:SRS052697_LANL_scaffold_12111	6653.46	0.754256	1	0.7543
7000000433.a:SRS050752_LANL_scaffold_17276	6384.58	0.999901	1	0.9999
7000000111.a:SRS019601_WUGC_scaffold_4587	6169.13	0.999012	1	0.999
7000000317.a:SRS014459_WUGC_scaffold_11311	5883.39	0.883332	1	0.8833
7000000460.a:SRS051031_LANL_scaffold_50865	5808.51	0.999815	1	0.9998
7000000258.a:SRS016335_WUGC_scaffold_29882	5564.62	0.875522	1	0.8755
7000000669.a:SRS022713_LANL_scaffold_10683	5495.7	0.901766	1	0.9018
7000000271.a:SRS053335_LANL_scaffold_24771	5308.21	0.761962	1	0.762
7000000142.a:SRS016753_Baylor_scaffold_16040	5175.62	1	1	1
7000000045.a:SRS013687_Baylor_scaffold_39059	5158.04	0.999951	1	1
3300003140.a:Ga0051081_1002036	5011.38	0.863535	1	0.8635
7000000334.a:SRS015217_WUGC_scaffold_4400	4949.12	0.972366	1	0.9724
7000000444.a:SRS063985_LANL_scaffold_25380	4944.6	0.998686	1	0.9987
7000000492.a:SRS048164_WUGC_scaffold_3268	4814.76	1	1	1
7000000459.a:SRS012902_Baylor_scaffold_2704	4783.11	0.777466	1	0.7775
7000000434.a:SRS014287_WUGC_scaffold_4299	4700.88	0.805452	1	0.8055
7000000334.a:SRS015217_WUGC_scaffold_31525	4650.57	0.978977	1	0.979
7000000546.a:SRS019910_WUGC_scaffold_48843	4597.27	0.937891	1	0.9379
7000000516.a:SRS019161_WUGC_scaffold_23113	4542.72	0.759456	1	0.7595
7000000094.a:SRS024549_LANL_scaffold_5988	4263.57	0.996861	1	0.9969
7000000498.a:SRS017521_Baylor_scaffold_40051	4248.33	0.992496	1	0.9925
7000000231.a:SRS014613_WUGC_scaffold_5491	4084.65	0.979916	1	0.9799
7000000417.a:SRS011239_Baylor_scaffold_19446	4054.98	0.947355	1	0.9474
7000000736.a:SRS014235_WUGC_scaffold_49626	4033.88	0.942805	1	0.9428
7000000633.a:SRS015065_WUGC_scaffold_8037	3825.06	0.998652	1	0.9987
7000000532.a:SRS011529_WUGC_scaffold_23832	3817.84	0.788228	1	0.7882
7000000515.a:SRS049995_LANL_scaffold_17190	3783.92	0.965268	1	0.9653
7000000192.a:SRS017821_Baylor_scaffold_7870	3772.1	1	1	1
7000000538.a:SRS024075_LANL_scaffold_26	3682.7	0.326122	1	0.3261
7000000628.a:SRS015782_WUGC_scaffold_27732	3625	0.481069	1	0.4811
7000000486.a:SRS015264_WUGC_scaffold_7670	3610.76	0.901178	1	0.9012
7000000434.a:SRS014287_WUGC_scaffold_4213	3562	0.991667	1	0.9917
7000000300.a:SRS043701_LANL_scaffold_31287	3556.77	0.993284	1	0.9933
7000000297.a:SRS056259_LANL_scaffold_56134	3514.73	0.953564	1	0.9536
7000000516.a:SRS019161_WUGC_scaffold_7477	3489.92	0.384401	1	0.3844
7000000045.a:SRS013687_Baylor_scaffold_49789	3473.57	0.999648	1	0.9996
7000000040.a:SRS043411_WUGC_scaffold_7890	3471.64	0.43834	1	0.4383
7000000460.a:SRS051031_LANL_scaffold_43781	3385.84	0.693105	1	0.6931
7000000178.a:SRS017247_LANL_scaffold_3057	3378.17	0.997527	1	0.9975
7000000093.a:SRS022137_LANL_scaffold_16775	3350.58	0.793871	1	0.7939
7000000317.a:SRS014459_WUGC_scaffold_31762	3241	0.949597	0.999999	0.9496
7000000192.a:SRS017821_Baylor_scaffold_15325	3237.54	1	1	1
7000000296.a:SRS024009_Baylor_scaffold_5167	3227.57	0.99966	1	0.9997
7000000587.a:SRS023971_Baylor_scaffold_2586	3213.72	0.727429	1	0.7274
7000000145.a:SRS050422_LANL_scaffold_38810	3204.34	0.999005	1	0.999
7000000142.a:SRS016753_Baylor_scaffold_14712	3168.4	0.999953	1	1
7000000429.a:C2070877	3159	0.998327	1	0.9983
7000000193.a:SRS048870_WUGC_scaffold_22340	3156.73	0.869075	1	0.8691
7000000715.a:SRS014683_WUGC_scaffold_38313	3107	0.692956	0.999999	0.693
7000000646.a:SRS015960_WUGC_scaffold_11785	3089.6	1	1	1
7000000011.a:SRS053214_LANL_scaffold_7045	3059.86	0.773189	1	0.7732
7000000193.a:SRS048870_WUGC_scaffold_15361	3007.73	0.362005	0.999994	0.362
7000000232.a:SRS015578_WUGC_scaffold_17494	2991.07	0.999633	1	0.9996
7000000289.a:SRS024331_LANL_scaffold_16269	2985.94	0.998334	1	0.9983
7000000646.a:SRS015960_WUGC_scaffold_30800	2980.98	0.850705	1	0.8507
3300003146.a:Ga0051080_1013286	2950.45	0.476802	0.999991	0.4768
7000000332.a:SRS015133_WUGC_scaffold_10007	2925.07	0.804141	1	0.8041
7000000071.a:SRS065504_LANL_scaffold_42854	2904.08	0.999259	1	0.9993
7000000112.a:SRS011302_Baylor_scaffold_24512	2878	0.512214	1	0.5122
7000000740.a:SRS064276_LANL_scaffold_20879	2826	0.630131	1	0.6301
3300003140.a:Ga0051081_1000343	2802.05	0.999497	1	0.9995
7000000093.a:SRS022137_LANL_scaffold_7313	2727.87	0.364496	1	0.3645
7000000069.a:SRS016095_WUGC_scaffold_4524	2699.76	0.411476	1	0.4115
3300003146.a:Ga0051080_1002265	2695.96	0.999077	1	0.9991
7000000464.a:SRS077730_LANL_scaffold_11133	2688.58	0.873682	1	0.8737
7000000191.a:C3074825	2678.14	0.539826	1	0.5398
7000000532.a:SRS011529_WUGC_scaffold_16757	2670.63	0.985337	1	0.9853
7000000158.a:SRS014979_WUGC_scaffold_615	2657.77	0.713365	1	0.7134
7000000460.a:SRS051031_LANL_scaffold_33620	2653.49	0.993941	1	0.9939
7000000417.a:SRS011239_Baylor_scaffold_29904	2639.01	0.960255	1	0.9603
7000000740.a:SRS064276_LANL_scaffold_34440	2631.66	1	1	1
7000000460.a:SRS051031_LANL_scaffold_38577	2587.36	0.999824	1	0.9998
7000000297.a:SRS056259_LANL_scaffold_26902	2577.69	0.884974	1	0.885
7000000418.a:SRS012273_Baylor_scaffold_24943	2551.71	0.999428	1	0.9994
7000000172.a:SRS020869_Baylor_scaffold_2143	2531.77	0.999536	1	0.9995
7000000740.a:SRS064276_LANL_scaffold_33847	2481.12	0.999903	1	0.9999
7000000181.a:SRS018656_WUGC_scaffold_1360	2408.43	0.996372	1	0.9964
7000000516.a:SRS019161_WUGC_scaffold_16553	2392.57	0.943562	1	0.9436
7000000425.a:SRS013476_Baylor_scaffold_8090	2345.46	0.999874	1	0.9999
7000000188.a:SRS053398_LANL_scaffold_24779	2338.81	0.83276	1	0.8328
7000000475.a:SRS020328_Baylor_scaffold_37397	2336.89	1	1	1
7000000011.a:SRS053214_LANL_scaffold_15526	2335.04	0.903152	1	0.9032
7000000158.a:SRS014979_WUGC_scaffold_7591	2332.27	0.577561	1	0.5776
7000000272.a:C1593863	2330	0.829689	1	0.8297
7000000418.a:SRS012273_Baylor_scaffold_35970	2327	0.318895	0.999999	0.3189
7000000373.a:SRS016989_Baylor_scaffold_17381	2310.02	1	1	1
7000000401.a:SRS011271_WUGC_scaffold_24007	2298.2	0.486966	0.999998	0.487
7000000077.a:SRS064645_LANL_scaffold_1559	2287.95	0.982461	1	0.9825
7000000172.a:SRS020869_Baylor_scaffold_9018	2276.4	0.891312	1	0.8913
7000000740.a:SRS064276_LANL_scaffold_6297	2219.58	0.999972	1	1
7000000633.a:SRS015065_WUGC_scaffold_31776	2213.99	0.866946	1	0.8669
7000000112.a:SRS011302_Baylor_scaffold_8338	2208.14	0.999073	1	0.9991
7000000193.a:SRS048870_WUGC_scaffold_11970	2188.97	0.999837	1	0.9998
3300003146.a:Ga0051080_1011628	2177.78	0.702925	0.999975	0.7029
7000000077.a:SRS064645_LANL_scaffold_5740	2170.76	0.851496	1	0.8515
7000000417.a:SRS011239_Baylor_scaffold_29301	2161	0.332264	1	0.3323
7000000232.a:SRS015578_WUGC_scaffold_47121	2160.35	0.728419	1	0.7284
7000000045.a:SRS013687_Baylor_scaffold_5025	2127	0.912683	1	0.9127
7000000077.a:SRS064645_LANL_scaffold_4766	2125.35	0.983404	0.999985	0.9834
7000000348.a:SRS017701_Baylor_scaffold_1906	2078.85	1	1	1
7000000646.a:SRS015960_WUGC_scaffold_32038	2050.83	0.963935	1	0.9639
7000000075.a:SRS016056_WUGC_scaffold_510	2050.59	0.437443	1	0.4374
7000000736.a:SRS014235_WUGC_scaffold_59350	2046.23	0.367828	0.999422	0.368
7000000740.a:SRS064276_LANL_scaffold_69549	2038.16	0.380183	0.996509	0.3815
7000000352.a:SRS014923_WUGC_scaffold_28200	2037.6	0.798693	1	0.7987
7000000262.a:SRS047044_WUGC_scaffold_30230	1975.04	0.891306	1	0.8913
7000000352.a:SRS014923_WUGC_scaffold_21234	1954.46	0.935377	1	0.9354
7000000516.a:SRS019161_WUGC_scaffold_9943	1934.5	0.99993	1	0.9999
7000000492.a:SRS048164_WUGC_scaffold_15247	1913.04	0.845678	1	0.8457
7000000300.a:SRS043701_LANL_scaffold_26644	1907.93	0.981824	1	0.9818
7000000077.a:SRS064645_LANL_scaffold_3244	1899.03	0.858602	1	0.8586
7000000546.a:SRS019910_WUGC_scaffold_2839	1880.92	0.422566	0.999916	0.4226
7000000417.a:SRS011239_Baylor_scaffold_25490	1849.17	0.889626	1	0.8896
7000000609.a:SRS056519_LANL_scaffold_32781	1823.74	1	1	1
7000000232.a:SRS015578_WUGC_scaffold_50160	1766.98	0.481808	1	0.4818
7000000385.a:SRS017433_Baylor_scaffold_16143	1753.18	0.790064	1	0.7901
7000000171.a:SRS052697_LANL_scaffold_15567	1747	0.942528	1	0.9425
3300003146.a:Ga0051080_1007824	1724.53	0.623834	1	0.6238
7000000464.a:SRS077730_LANL_scaffold_3549	1711.34	0.845724	0.999975	0.8457
7000000646.a:SRS015960_WUGC_scaffold_3189	1711.02	0.992036	1	0.992
7000000186.a:SRS022524_Baylor_scaffold_22974	1691.23	0.92178	1	0.9218
7000000633.a:SRS015065_WUGC_scaffold_40156	1684.47	0.567224	1	0.5672
7000000081.a:SRS017307_Baylor_scaffold_8553	1650	0.416656	0.999943	0.4167
7000000334.a:SRS015217_WUGC_scaffold_34308	1647.19	1	1	1
7000000333.a:SRS050925_LANL_scaffold_51739	1611.3	0.522419	1	0.5224
7000000549.a:SRS013521_LANL_scaffold_12643	1607.59	0.906209	1	0.9062
7000000538.a:SRS024075_LANL_scaffold_11531	1605.53	0.998189	1	0.9982
7000000077.a:SRS064645_LANL_scaffold_295	1601.92	0.859719	1	0.8597
7000000464.a:SRS077730_LANL_scaffold_14169	1601.22	0.387357	0.999994	0.3874
7000000335.a:SRS015369_Baylor_scaffold_3634	1600.99	0.671346	1	0.6713
7000000158.a:SRS014979_WUGC_scaffold_14669	1558	0.941482	1	0.9415
7000000464.a:SRS077730_LANL_scaffold_1401	1549.84	0.76146	1	0.7615
7000000492.a:SRS048164_WUGC_scaffold_24100	1548.05	0.998549	1	0.9985
7000000188.a:SRS053398_LANL_scaffold_19918	1538.31	0.897849	1	0.8978
7000000112.a:C3417653	1537.63	0.999735	1	0.9997
3300003146.a:Ga0051080_1013285	1519.32	0.458955	0.99999	0.459
7000000521.a:SRS023583_Baylor_scaffold_7990	1517.55	0.38382	0.999996	0.3838
7000000380.a:SRS015663_WUGC_scaffold_33235	1494.08	0.879676	1	0.8797
7000000433.a:SRS050752_LANL_scaffold_13058	1491.25	0.961958	1	0.962
3300003140.a:Ga0051081_1009322	1485	0.999871	1	0.9999
7000000111.a:SRS019601_WUGC_scaffold_45411	1474	1	1	1
7000000111.a:SRS019601_WUGC_scaffold_34018	1465.91	0.869198	1	0.8692
7000000045.a:SRS013687_Baylor_scaffold_49129	1461.53	0.899018	1	0.899
7000000232.a:SRS015578_WUGC_scaffold_37647	1458.15	0.893791	0.99998	0.8938
7000000171.a:SRS052697_LANL_scaffold_31029	1456.09	0.533658	0.999893	0.5337
7000000098.a:SRS023176_Baylor_scaffold_4581	1453.22	0.464209	0.999998	0.4642
7000000317.a:SRS014459_WUGC_scaffold_19157	1450.31	0.998291	1	0.9983
7000000712.a:SRS057478_LANL_scaffold_23604	1433.14	0.432119	0.9998	0.4322
7000000370.a:SRS017191_Baylor_scaffold_18441	1431.69	0.957327	1	0.9573
7000000186.a:SRS022524_Baylor_scaffold_44229	1416.18	0.998325	1	0.9983
7000000538.a:SRS024075_LANL_scaffold_17053	1402	0.967626	1	0.9676
7000000308.a:SRS058770_LANL_scaffold_2124	1396	0.406134	1	0.4061
7000000036.a:SRS049164_WUGC_scaffold_46965	1395.88	0.942171	1	0.9422
7000000735.a:SRS015190_WUGC_scaffold_19745	1393.3	0.921327	1	0.9213
7000000011.a:SRS053214_LANL_scaffold_8387	1393.1	0.340068	1	0.3401
7000000302.a:SRS023914_Baylor_scaffold_13777	1374.29	0.558938	0.999848	0.559
7000000320.a:SRS063040_Baylor_scaffold_54287	1362.62	1	1	1
7000000630.a:SRS062427_LANL_scaffold_3363	1350.02	0.733004	0.99996	0.733
7000000171.a:SRS052697_LANL_scaffold_44596	1344.47	0.716958	0.998957	0.7177
7000000624.a:SRS024435_LANL_scaffold_33266	1321	0.751703	1	0.7517
7000000107.a:SRS042628_WUGC_scaffold_19969	1316.66	0.999685	1	0.9997
7000000200.a:SRS023526_Baylor_scaffold_6468	1314.9	0.423549	0.999999	0.4235
7000000040.a:SRS043411_WUGC_scaffold_38934	1296	0.456577	1	0.4566
7000000661.a:SRS052027_LANL_scaffold_16529	1265.29	0.81643	0.998971	0.8173
3300003146.a:Ga0051080_1006856	1264.52	0.902278	1	0.9023
7000000172.a:SRS020869_Baylor_scaffold_8026	1258.05	0.999933	1	0.9999
7000000032.a:SRS024132_Baylor_scaffold_21369	1245	0.333827	0.999688	0.3339
7000000460.a:SRS051031_LANL_scaffold_14138	1240.79	0.723949	0.999824	0.7241
7000000093.a:SRS022137_LANL_scaffold_5967	1236.31	0.996399	1	0.9964
7000000434.a:SRS014287_WUGC_scaffold_11775	1232.96	0.748357	0.999998	0.7484
7000000624.a:SRS024435_LANL_scaffold_33663	1230	0.967659	1	0.9677
7000000490.a:SRS013800_Baylor_scaffold_14545	1221.01	1	1	1
7000000300.a:SRS043701_LANL_scaffold_6919	1205.24	0.999953	1	1
7000000317.a:SRS014459_WUGC_scaffold_30712	1203.13	0.704162	0.9995	0.7045
7000000112.a:SRS011302_Baylor_scaffold_21779	1199.45	0.786245	1	0.7862
7000000498.a:SRS017521_Baylor_scaffold_15938	1199.13	0.429572	0.995368	0.4316
7000000407.a:C3633842	1194.21	0.842811	1	0.8428
7000000193.a:SRS048870_WUGC_scaffold_23736	1169.28	0.949273	1	0.9493
7000000434.a:SRS014287_WUGC_scaffold_38549	1169	0.974821	1	0.9748
7000000433.a:SRS050752_LANL_scaffold_36687	1168.6	0.911197	1	0.9112
7000000633.a:SRS015065_WUGC_scaffold_42692	1165.86	0.31645	0.984719	0.3214
7000000071.a:SRS065504_LANL_scaffold_28056	1161	0.494073	0.996928	0.4956
7000000083.a:C15593027	1154.68	0.863811	1	0.8638
7000000628.a:C3502443	1147.89	0.919766	1	0.9198
7000000587.a:SRS023971_Baylor_scaffold_4655	1143.07	0.591289	1	0.5913
7000000509.a:SRS054590_LANL_scaffold_9148	1141.34	0.831749	1	0.8317
7000000332.a:SRS015133_WUGC_scaffold_39195	1137.98	0.531954	1	0.532
7000000417.a:SRS011239_Baylor_scaffold_5769	1135.67	0.983879	1	0.9839
7000000317.a:SRS014459_WUGC_scaffold_24841	1125.52	0.941881	1	0.9419
7000000171.a:SRS052697_LANL_scaffold_62758	1124.53	0.324027	0.999999	0.324
7000000011.a:SRS053214_LANL_scaffold_25652	1123.2	0.518817	0.999987	0.5188
7000000317.a:SRS014459_WUGC_scaffold_50280	1107.03	0.314087	0.999954	0.3141
7000000320.a:SRS063040_Baylor_scaffold_57179	1090.36	0.998367	1	0.9984
7000000516.a:C2642171	1087	0.99873	1	0.9987
7000000526.a:SRS019397_WUGC_scaffold_28077	1082.73	0.69717	0.989762	0.7044
7000000735.a:SRS015190_WUGC_scaffold_29555	1079.75	0.427962	0.999979	0.428
7000000429.a:C2072231	1078	0.551678	0.999985	0.5517
7000000715.a:SRS014683_WUGC_scaffold_10823	1073.07	0.599798	1	0.5998
7000000171.a:SRS052697_LANL_scaffold_17663	1071.3	0.388109	1	0.3881
7000000492.a:SRS048164_WUGC_scaffold_32442	1067.88	0.813675	1	0.8137
7000000570.a:SRS051882_Baylor_scaffold_15608	1066.65	0.998793	1	0.9988
7000000158.a:SRS014979_WUGC_scaffold_10649	1065.49	0.999906	1	0.9999
7000000232.a:SRS015578_WUGC_scaffold_51358	1061	0.956329	1	0.9563
7000000289.a:SRS024331_LANL_scaffold_48631	1058.9	0.734942	1	0.7349
7000000239.a:SRS013951_WUGC_scaffold_6620	1054	0.864854	1	0.8649
7000000006.a:SRS054956_LANL_scaffold_12498	1053.99	0.9897	0.999701	0.99
7000000609.a:SRS056519_LANL_scaffold_24833	1045.25	0.813294	1	0.8133
7000000131.a:SRS057717_LANL_scaffold_11726	1039.26	0.953737	1	0.9537
7000000712.a:SRS057478_LANL_scaffold_27036	1037.15	0.972623	1	0.9726
7000000380.a:SRS015663_WUGC_scaffold_187	1031.57	0.99982	1	0.9998
7000000308.a:SRS058770_LANL_scaffold_6219	1026.38	0.568472	0.9997	0.5686
7000000171.a:SRS052697_LANL_scaffold_53090	1018.68	0.623605	0.999982	0.6236
7000000481.a:SRS047014_WUGC_scaffold_65733	1010.38	0.949988	1	0.95
7000000231.a:SRS014613_WUGC_scaffold_15665	1010.35	0.304276	0.939621	0.3238
7000000418.a:SRS012273_Baylor_scaffold_38856	1002.73	0.999356	1	0.9994
7000000515.a:SRS049995_LANL_scaffold_40969	1000	1	0.999999	1
3300003146.a:Ga0051080_1003158	995.823	0.519726	1	0.5197
7000000071.a:SRS065504_LANL_scaffold_57925	991	0.448263	0.999999	0.4483
7000000111.a:SRS019601_WUGC_scaffold_14923	990.234	0.994469	1	0.9945
7000000186.a:SRS022524_Baylor_scaffold_18091	985	0.578234	0.999913	0.5783
7000000498.a:SRS017521_Baylor_scaffold_21475	981.755	0.980555	1	0.9806
7000000308.a:SRS058770_LANL_scaffold_32137	979.142	0.901286	0.999994	0.9013
7000000410.a:SRS019030_Baylor_scaffold_32715	978	0.414559	0.999962	0.4146
7000000628.a:SRS015782_WUGC_scaffold_3641	950	0.987059	1	0.9871
7000000531.a:SRS049959_WUGC_scaffold_8601	949.827	0.604958	0.999999	0.605
7000000352.a:SRS014923_WUGC_scaffold_8559	940.518	0.601613	0.999866	0.6017
7000000011.a:SRS053214_LANL_scaffold_1564	940	0.429269	1	0.4293
7000000641.a:SRS018351_Baylor_scaffold_21250	939.055	0.602101	1	0.6021
7000000515.a:SRS049995_LANL_scaffold_1391	927.051	0.660983	0.99583	0.6638
7000000045.a:SRS013687_Baylor_scaffold_5170	923.45	0.762057	0.999997	0.7621
7000000011.a:SRS053214_LANL_scaffold_10149	922.614	0.612703	0.999826	0.6128
7000000289.a:SRS024331_LANL_scaffold_41417	915.657	0.608926	0.998051	0.6101
7000000492.a:SRS048164_WUGC_scaffold_6049	914.698	0.727512	0.999269	0.728
7000000526.a:SRS019397_WUGC_scaffold_19451	909.88	0.999736	1	0.9997
7000000094.a:SRS024549_LANL_scaffold_11251	899.106	0.797538	1	0.7975
7000000460.a:SRS051031_LANL_scaffold_4812	897.245	0.999272	1	0.9993
7000000186.a:SRS022524_Baylor_scaffold_63692	897.099	0.866674	1	0.8667
7000000633.a:SRS015065_WUGC_scaffold_38818	896.582	0.881316	0.999999	0.8813
7000000695.a:SRS049900_LANL_scaffold_18790	893.868	0.913737	1	0.9137
7000000040.a:SRS043411_WUGC_scaffold_21308	892.235	0.428834	0.983169	0.4362
7000000624.a:SRS024435_LANL_scaffold_32816	889.431	0.986389	1	0.9864
7000000498.a:SRS017521_Baylor_scaffold_3364	885.958	0.857532	0.983583	0.8718
7000000045.a:SRS013687_Baylor_scaffold_59596	884.455	0.999447	1	0.9994
3300003140.a:Ga0051081_1012476	879.309	0.27668	0.853471	0.3242
7000000684.a:SRS019582_WUGC_scaffold_51542	875.504	0.645568	0.999994	0.6456
7000000538.a:SRS024075_LANL_scaffold_17794	874.345	1	1	1
7000000531.a:SRS049959_WUGC_scaffold_30759	873.79	0.734222	0.998439	0.7354
7000000684.a:SRS019582_WUGC_scaffold_25599	865	0.409597	0.989152	0.4141
7000000370.a:SRS017191_Baylor_scaffold_21193	859.265	0.970581	1	0.9706
3300003146.a:Ga0051080_1010211	855.919	0.738803	0.999058	0.7395
7000000736.a:SRS014235_WUGC_scaffold_18964	847.573	0.493657	1	0.4937
7000000370.a:SRS017191_Baylor_scaffold_23359	844.525	0.955472	1	0.9555
7000000045.a:SRS013687_Baylor_scaffold_20818	844.07	0.996803	1	0.9968
7000000232.a:SRS015578_WUGC_scaffold_296	840.688	0.454065	0.998084	0.4549
7000000142.a:SRS016753_Baylor_scaffold_22	834	0.695148	1	0.6951
7000000192.a:C2499098	822.828	1	1	1
7000000334.a:SRS015217_WUGC_scaffold_16294	821.464	0.706314	0.995776	0.7093
7000000444.a:SRS063985_LANL_scaffold_7386	818.818	0.420128	1	0.4201
7000000332.a:SRS015133_WUGC_scaffold_29132	816.205	0.833992	1	0.834
7000000538.a:SRS024075_LANL_scaffold_11346	808.003	0.997949	1	0.9979
7000000111.a:SRS019601_WUGC_scaffold_2387	803.952	0.994786	0.999991	0.9948
7000000006.a:SRS054956_LANL_scaffold_45036	802.378	0.661707	0.999867	0.6618
7000000186.a:SRS022524_Baylor_scaffold_4999	802.129	0.696175	1	0.6962
7000000296.a:C1830652	802	0.972549	0.99993	0.9726
7000000516.a:SRS019161_WUGC_scaffold_66992	800.031	0.893836	0.999999	0.8938
7000000684.a:SRS019582_WUGC_scaffold_22380	797.242	0.867559	1	0.8676
7000000232.a:SRS015578_WUGC_scaffold_37960	794.243	0.332272	0.928321	0.3579
7000000192.a:C2494522	793	0.998317	1	0.9983
7000000633.a:SRS015065_WUGC_scaffold_2847	788.884	0.727947	0.99879	0.7288
7000000417.a:SRS011239_Baylor_scaffold_29642	787.39	0.876483	1	0.8765
7000000231.a:SRS014613_WUGC_scaffold_29584	786.917	0.887802	0.99998	0.8878
7000000334.a:SRS015217_WUGC_scaffold_5606	786.461	0.306145	0.984351	0.311
7000000646.a:SRS015960_WUGC_scaffold_16943	785	0.554285	0.999998	0.5543
7000000370.a:SRS017191_Baylor_scaffold_3408	783.698	0.510099	1	0.5101
7000000646.a:SRS015960_WUGC_scaffold_14975	780.085	0.463945	0.9998	0.464
7000000158.a:SRS014979_WUGC_scaffold_29059	780	0.997723	1	0.9977
7000000684.a:SRS019582_WUGC_scaffold_85806	778.606	0.996275	1	0.9963
7000000429.a:C2070823	774.234	0.669663	1	0.6697
7000000433.a:SRS050752_LANL_scaffold_4992	772.333	0.59326	0.934718	0.6347
7000000715.a:SRS014683_WUGC_scaffold_51421	768.049	0.989746	1	0.9897
7000000659.a:SRS015854_WUGC_scaffold_17917	767.021	1	1	1
7000000289.a:SRS024331_LANL_scaffold_47838	766.454	0.458132	0.999092	0.4585
7000000297.a:SRS056259_LANL_scaffold_23533	761.211	0.999171	1	0.9992
7000000231.a:SRS014613_WUGC_scaffold_1630	758.061	0.330279	0.988683	0.3341
7000000740.a:SRS064276_LANL_scaffold_8498	757.25	0.388341	0.999355	0.3886
7000000633.a:SRS015065_WUGC_scaffold_20166	752.762	1	1	1
7000000045.a:SRS013687_Baylor_scaffold_19069	737.685	0.41288	0.98972	0.4172
7000000690.a:SRS055982_Baylor_scaffold_3508	737.267	0.415618	0.994255	0.418
7000000661.a:SRS052027_LANL_scaffold_16499	734.329	0.614266	0.999934	0.6143
7000000317.a:C2700901	733.444	0.982732	1	0.9827
7000000112.a:C3418093	733.354	0.564757	0.999969	0.5648
7000000320.a:SRS063040_Baylor_scaffold_39114	731	0.329336	0.992298	0.3319
7000000077.a:SRS064645_LANL_scaffold_2386	726.623	0.313371	0.999163	0.3136
7000000107.a:SRS042628_WUGC_scaffold_3180	726	0.986004	1	0.986
7000000532.a:SRS011529_WUGC_scaffold_9616	721.694	0.587588	1	0.5876
7000000112.a:C3418131	719.243	1	1	1
7000000122.a:SRS042284_WUGC_scaffold_9524	715.972	0.722232	1	0.7222
7000000296.a:SRS024009_Baylor_scaffold_72	714.703	0.924821	0.997817	0.9268
7000000093.a:SRS022137_LANL_scaffold_648	713.519	0.8979	1	0.8979
7000000308.a:SRS058770_LANL_scaffold_26875	713.342	0.633454	0.999852	0.6335
7000000627.a:SRS014313_WUGC_scaffold_5153	709.767	0.984606	1	0.9846
7000000370.a:SRS017191_Baylor_scaffold_21968	708.49	0.94687	1	0.9469
7000000300.a:SRS043701_LANL_scaffold_19429	705	0.415327	0.993898	0.4179
7000000112.a:SRS011302_Baylor_scaffold_18536	702.499	0.939042	1	0.939
7000000444.a:SRS063985_LANL_scaffold_14384	700.044	0.843372	1	0.8434
3300003146.a:Ga0051080_1019687	700	1	0.999988	1
7000000582.a:SRS019787_WUGC_scaffold_25417	699.392	0.981314	1	0.9813
7000000532.a:SRS011529_WUGC_scaffold_31780	696.621	0.999486	1	0.9995
7000000626.a:SRS064557_LANL_scaffold_5967	696.529	0.998151	1	0.9982
7000000444.a:SRS063985_LANL_scaffold_56162	696.003	0.761334	0.999983	0.7613
3300003140.a:Ga0051081_1006770	691.509	0.692533	1	0.6925
7000000521.a:SRS023583_Baylor_scaffold_11082	687	0.323716	1	0.3237
7000000308.a:SRS058770_LANL_scaffold_38398	682.652	0.349286	0.99999	0.3493
7000000262.a:SRS047044_WUGC_scaffold_28336	679.711	0.999649	1	0.9996
7000000107.a:SRS042628_WUGC_scaffold_11024	674.006	0.636689	0.999524	0.637
7000000022.a:SRS011452_WUGC_scaffold_1815	673.552	0.980549	1	0.9805
7000000736.a:SRS014235_WUGC_scaffold_67145	669.76	0.708523	1	0.7085
7000000740.a:SRS064276_LANL_scaffold_53752	663.908	0.830744	0.982272	0.8457
7000000380.a:SRS015663_WUGC_scaffold_9299	663.891	0.772566	0.99083	0.7797
7000000158.a:SRS014979_WUGC_scaffold_36459	661.192	0.529455	0.999873	0.5295
7000000373.a:SRS016989_Baylor_scaffold_12709	660.508	0.986919	1	0.9869
7000000308.a:SRS058770_LANL_scaffold_29582	657.57	0.386676	0.948031	0.4079
7000000045.a:SRS013687_Baylor_scaffold_35231	656.609	0.991224	1	0.9912
7000000122.a:SRS042284_WUGC_scaffold_8327	654.621	0.608696	1	0.6087
7000000736.a:SRS014235_WUGC_scaffold_64998	651.663	0.452862	0.985518	0.4595
7000000306.a:SRS043001_WUGC_scaffold_44707	651	0.999323	1	0.9993
7000000633.a:SRS015065_WUGC_scaffold_4951	646.907	0.998477	1	0.9985
7000000460.a:SRS051031_LANL_scaffold_41318	643.273	0.737701	0.99997	0.7377
7000000407.a:C3633634	641.983	0.839497	1	0.8395
7000000232.a:SRS015578_WUGC_scaffold_31076	637.761	0.46853	0.999996	0.4685
7000000538.a:SRS024075_LANL_scaffold_18687	637.55	0.743846	1	0.7438
7000000735.a:SRS015190_WUGC_scaffold_22815	637.476	0.56503	1	0.565
7000000040.a:SRS043411_WUGC_scaffold_15815	637	1	1	1
7000000352.a:SRS014923_WUGC_scaffold_15552	635.004	0.998084	1	0.9981
7000000193.a:SRS048870_WUGC_scaffold_19106	634.875	0.52763	0.999426	0.5279
7000000069.a:SRS016095_WUGC_scaffold_21527	634.442	0.694455	1	0.6945
7000000740.a:SRS064276_LANL_scaffold_5388	632.385	0.477787	0.97755	0.4888
7000000093.a:SRS022137_LANL_scaffold_26554	631.234	0.365758	0.999285	0.366
7000000397.a:SRS011586_WUGC_scaffold_33288	631	0.727525	0.999982	0.7275
3300003146.a:Ga0051080_1011624	624.735	0.899991	0.999998	0.9
7000000515.a:C2638894	623.894	0.869275	1	0.8693
7000000661.a:SRS052027_LANL_scaffold_18245	621.219	0.379451	0.971981	0.3904
7000000232.a:SRS015578_WUGC_scaffold_13475	615.87	0.512986	0.994361	0.5159
7000000531.a:SRS049959_WUGC_scaffold_24355	614	1	1	1
7000000380.a:SRS015663_WUGC_scaffold_31145	612.534	0.951194	1	0.9512
7000000069.a:SRS016095_WUGC_scaffold_19329	610.443	1	1	1
7000000265.a:C2881575	607.305	0.565785	1	0.5658
7000000239.a:SRS013951_WUGC_scaffold_47254	606.704	0.999968	1	1
7000000630.a:SRS062427_LANL_scaffold_16053	603	0.309971	1	0.31
7000000403.a:SRS024388_LANL_scaffold_84	602.087	0.999741	1	0.9997
7000000370.a:SRS017191_Baylor_scaffold_25985	601.253	0.983158	1	0.9832
7000000081.a:SRS017307_Baylor_scaffold_7371	598.962	0.473104	0.987691	0.479
7000000271.a:SRS053335_LANL_scaffold_31241	595.797	0.328351	0.999983	0.3284
7000000609.a:SRS056519_LANL_scaffold_2340	595.69	0.854598	1	0.8546
7000000308.a:SRS058770_LANL_scaffold_31095	591.316	0.863001	0.99964	0.8633
7000000418.a:SRS012273_Baylor_scaffold_968	591.047	0.845524	0.99745	0.8477
7000000218.a:C3076292	587.777	0.529821	0.999265	0.5302
7000000632.a:SRS050299_LANL_scaffold_14870	585	0.3497	1	0.3497
7000000232.a:SRS015578_WUGC_scaffold_38693	584.402	0.525865	0.983747	0.5346
7000000626.a:C1917078	584	0.932967	1	0.933
7000000515.a:SRS049995_LANL_scaffold_71	582.946	0.97155	0.999785	0.9718
7000000546.a:SRS019910_WUGC_scaffold_48242	580.722	0.619889	0.999999	0.6199
7000000081.a:SRS017307_Baylor_scaffold_25643	577.78	0.419255	0.999103	0.4196
7000000032.a:SRS024132_Baylor_scaffold_8274	577.757	0.496706	1	0.4967
7000000627.a:SRS014313_WUGC_scaffold_508	577.605	1	1	1
7000000641.a:C2814179	576.986	0.896001	1	0.896
7000000669.a:SRS022713_LANL_scaffold_2817	570.791	0.547259	0.999639	0.5475
7000000410.a:SRS019030_Baylor_scaffold_2097	570.708	0.59508	1	0.5951
7000000045.a:SRS013687_Baylor_scaffold_48342	569.79	0.998892	1	0.9989
7000000071.a:C3429831	568.099	0.776934	1	0.7769
7000000516.a:SRS019161_WUGC_scaffold_30524	567.356	0.922954	0.999999	0.923
7000000142.a:SRS016753_Baylor_scaffold_14436	566.922	1	1	1
7000000441.a:SRS015794_Baylor_scaffold_1280	566.469	0.93161	0.999999	0.9316
7000000071.a:SRS065504_LANL_scaffold_22142	566.089	0.805403	0.997176	0.8077
7000000045.a:SRS013687_Baylor_scaffold_16426	565.117	0.577445	1	0.5774
7000000300.a:SRS043701_LANL_scaffold_22119	564.871	0.581104	0.99981	0.5812
7000000418.a:C3792130	562	1	1	1
7000000192.a:C2499635	561.543	0.582098	0.999998	0.5821
7000000481.a:SRS047014_WUGC_scaffold_69278	555.452	0.897973	0.999983	0.898
7000000069.a:SRS016095_WUGC_scaffold_17282	552	0.991935	0.998104	0.9938
7000000186.a:SRS022524_Baylor_scaffold_74229	548.075	0.999131	1	0.9991
7000000333.a:SRS050925_LANL_scaffold_5503	547.711	0.55253	0.965051	0.5725
7000000464.a:SRS077730_LANL_scaffold_14893	546.78	0.92203	0.998859	0.9231
7000000111.a:SRS019601_WUGC_scaffold_14661	546.245	0.981019	1	0.981
7000000243.a:C4025582	546.036	0.996261	1	0.9963
7000000633.a:SRS015065_WUGC_scaffold_13433	540.934	0.876549	1	0.8765
7000000252.a:C2208458	540	1	1	1
7000000736.a:SRS014235_WUGC_scaffold_70343	538	1	1	1
7000000633.a:C2488216	534.047	0.910424	0.999294	0.9111
7000000302.a:SRS023914_Baylor_scaffold_5263	534	0.848752	0.957079	0.8868
7000000441.a:SRS015794_Baylor_scaffold_20364	531.837	0.998073	1	0.9981
7000000075.a:C1203267	531.474	0.797322	1	0.7973
7000000632.a:SRS050299_LANL_scaffold_21042	530.457	0.299946	0.990597	0.3028
7000000122.a:C1755092	530.391	0.984188	1	0.9842
7000000444.a:SRS063985_LANL_scaffold_45200	529.2	0.409375	0.95365	0.4293
7000000417.a:SRS011239_Baylor_scaffold_14910	529.074	0.840043	0.999193	0.8407
7000000032.a:SRS024132_Baylor_scaffold_30054	527.045	0.829735	1	0.8297
7000000282.a:SRS019685_WUGC_scaffold_54525	524.62	0.676902	1	0.6769
7000000093.a:SRS022137_LANL_scaffold_29799	523.957	0.823618	1	0.8236
7000000317.a:SRS014459_WUGC_scaffold_95758	523.071	0.703051	0.990442	0.7098
7000000385.a:C1841523	520	1	1	1
7000000333.a:SRS050925_LANL_scaffold_43871	517.975	0.826927	0.96161	0.8599
3300003140.a:Ga0051081_1009321	517.959	0.992883	0.999991	0.9929
7000000646.a:C1934882	517.082	0.58916	1	0.5892
7000000069.a:C2611891	511	1	0.999999	1
7000000628.a:SRS015782_WUGC_scaffold_1599	509.525	0.494517	0.999997	0.4945
7000000317.a:SRS014459_WUGC_scaffold_73917	509.275	0.75593	0.999123	0.7566
7000000081.a:SRS017307_Baylor_scaffold_6106	508.841	0.995064	0.999322	0.9957
7000000475.a:SRS020328_Baylor_scaffold_3509	507.585	0.357088	0.993195	0.3595
7000000609.a:SRS056519_LANL_scaffold_11960	504.583	0.970485	0.99877	0.9717
7000000333.a:SRS050925_LANL_scaffold_41080	503.897	0.325128	0.98938	0.3286
7000000192.a:C2499691	502.861	1	1	1
7000000098.a:SRS023176_Baylor_scaffold_13473	501.662	0.999911	1	0.9999
7000000252.a:C2209446	498.788	0.988933	0.998167	0.9907
7000000492.a:SRS048164_WUGC_scaffold_14045	498.58	0.620502	0.990297	0.6266
7000000380.a:SRS015663_WUGC_scaffold_1668	494.257	0.972061	1	0.9721
7000000145.a:SRS050422_LANL_scaffold_56839	490.679	0.530283	0.970598	0.5463
7000000181.a:SRS018656_WUGC_scaffold_14050	489.435	0.663203	0.999803	0.6633
7000000370.a:SRS017191_Baylor_scaffold_22854	486.8	0.811965	1	0.812
7000000011.a:SRS053214_LANL_scaffold_17308	482.375	0.996738	1	0.9967
7000000145.a:SRS050422_LANL_scaffold_89071	482.237	0.582367	1	0.5824
7000000296.a:SRS024009_Baylor_scaffold_6585	481.77	0.800215	1	0.8002
7000000624.a:SRS024435_LANL_scaffold_18853	481.451	0.332772	0.74767	0.4451
7000000373.a:SRS016989_Baylor_scaffold_5882	479.325	0.998962	1	0.999
7000000186.a:SRS022524_Baylor_scaffold_76131	476.341	0.486086	0.983091	0.4944
7000000006.a:SRS054956_LANL_scaffold_27325	471.442	0.899296	0.999213	0.9
7000000401.a:C3194327	471	1	0.99999	1
7000000112.a:SRS011302_Baylor_scaffold_22046	470.353	0.954312	1	0.9543
7000000213.a:SRS011405_WUGC_scaffold_13873	463.456	0.934131	0.999179	0.9349
7000000417.a:SRS011239_Baylor_scaffold_17453	463.083	0.668112	1	0.6681
7000000302.a:SRS023914_Baylor_scaffold_2355	462.15	0.99605	1	0.9961
7000000131.a:SRS057717_LANL_scaffold_11165	458.358	0.907936	1	0.9079
7000000633.a:SRS015065_WUGC_scaffold_40560	456.981	0.689152	0.999996	0.6892
7000000231.a:SRS014613_WUGC_scaffold_21346	455.826	0.845664	1	0.8457
7000000213.a:SRS011405_WUGC_scaffold_26356	455.432	0.820307	0.999045	0.8211
7000000317.a:SRS014459_WUGC_scaffold_94515	453.428	0.686559	0.999994	0.6866
7000000475.a:SRS020328_Baylor_scaffold_33236	451.634	0.834877	0.999406	0.8354
7000000352.a:SRS014923_WUGC_scaffold_59198	451.105	0.995129	0.999999	0.9951
7000000659.a:SRS015854_WUGC_scaffold_25833	448.513	0.580256	0.999987	0.5803
7000000372.a:SRS045713_WUGC_scaffold_43563	445.06	0.373907	0.99741	0.3749
7000000684.a:SRS019582_WUGC_scaffold_37403	445	0.992495	0.999979	0.9925
7000000188.a:SRS053398_LANL_scaffold_29001	440.772	0.837863	0.999956	0.8379
7000000069.a:SRS016095_WUGC_scaffold_499	440.68	0.335167	0.964463	0.3475
7000000297.a:SRS056259_LANL_scaffold_53198	437.905	0.905002	1	0.905
7000000317.a:SRS014459_WUGC_scaffold_63797	436.504	0.338351	0.988585	0.3423
7000000289.a:SRS024331_LANL_scaffold_25078	435.693	0.971602	1	0.9716
7000000641.a:C2815737	435	0.998217	0.999914	0.9983
7000000184.a:SRS016954_Baylor_scaffold_3876	432.801	0.732289	1	0.7323
7000000145.a:SRS050422_LANL_scaffold_92522	432.531	0.999625	1	0.9996
7000000526.a:SRS019397_WUGC_scaffold_22739	428.263	0.600372	0.999825	0.6005
7000000481.a:SRS047014_WUGC_scaffold_78473	427	0.837642	0.999989	0.8377
7000000112.a:SRS011302_Baylor_scaffold_10368	423.863	0.666907	0.998993	0.6676
7000000077.a:SRS064645_LANL_scaffold_229	422.028	0.899066	0.999957	0.8991
7000000069.a:SRS016095_WUGC_scaffold_12996	421.861	0.703013	0.999953	0.703
7000000516.a:SRS019161_WUGC_scaffold_10156	420.631	0.417845	0.993792	0.4205
7000000740.a:SRS064276_LANL_scaffold_8125	419.091	0.330356	0.97005	0.3406
7000000628.a:SRS015782_WUGC_scaffold_39917	419.043	0.693007	0.982095	0.7056
7000000736.a:SRS014235_WUGC_scaffold_4960	413.251	0.51755	0.979764	0.5282
7000000633.a:SRS015065_WUGC_scaffold_12114	412.189	0.799194	0.999949	0.7992
7000000546.a:SRS019910_WUGC_scaffold_60090	412.046	0.384898	0.938635	0.4101
7000000418.a:SRS012273_Baylor_scaffold_1039	411.375	0.468131	0.997775	0.4692
7000000022.a:SRS011452_WUGC_scaffold_8852	410.001	0.990942	1	0.9909
7000000401.a:SRS011271_WUGC_scaffold_27850	409.946	0.443157	0.999204	0.4435
7000000515.a:SRS049995_LANL_scaffold_20086	406.397	0.989558	1	0.9896
7000000231.a:SRS014613_WUGC_scaffold_26360	405.89	0.570605	0.936866	0.6091
7000000628.a:SRS015782_WUGC_scaffold_4605	405.834	1	1	1
7000000740.a:SRS064276_LANL_scaffold_45740	405.234	0.986902	0.999999	0.9869
7000000441.a:SRS015794_Baylor_scaffold_12587	403.67	0.999966	1	1
7000000532.a:SRS011529_WUGC_scaffold_1574	403.21	0.404921	0.999997	0.4049
7000000646.a:SRS015960_WUGC_scaffold_17729	402.746	0.418056	0.999859	0.4181
7000000040.a:SRS043411_WUGC_scaffold_49004	402.496	0.924105	0.999293	0.9248
7000000418.a:SRS012273_Baylor_scaffold_31399	402	1	0.999868	0.9999
7000000069.a:SRS016095_WUGC_scaffold_38404	399.232	0.722939	1	0.7229
7000000624.a:SRS024435_LANL_scaffold_1544	397.984	0.991122	0.999934	0.9912
7000000192.a:SRS017821_Baylor_scaffold_23929	397.329	0.997586	1	0.9976
7000000486.a:SRS015264_WUGC_scaffold_57621	397.142	0.84495	1	0.845
7000000538.a:SRS024075_LANL_scaffold_15318	395.672	0.999534	1	0.9995
7000000040.a:SRS043411_WUGC_scaffold_6149	395.438	0.859332	0.998506	0.8606
7000000380.a:C3130888	395.062	0.952826	1	0.9528
7000000036.a:SRS049164_WUGC_scaffold_29471	395.045	0.322658	0.901023	0.3581
7000000418.a:SRS012273_Baylor_scaffold_32604	394	0.598671	0.941991	0.6355
7000000418.a:SRS012273_Baylor_scaffold_1923	388.578	0.562807	1	0.5628
7000000171.a:SRS052697_LANL_scaffold_14420	387.705	0.649088	0.888519	0.7305
7000000736.a:SRS014235_WUGC_scaffold_72893	386.667	0.997872	0.999067	0.9988
7000000278.a:SRS018133_Baylor_scaffold_32432	385.764	0.975761	0.999999	0.9758
7000000661.a:SRS052027_LANL_scaffold_25762	384.792	0.999273	1	0.9993
7000000433.a:SRS050752_LANL_scaffold_17525	383.067	0.469773	0.972064	0.4833
7000000352.a:C3382711	381.738	0.951098	1	0.9511
7000000302.a:SRS023914_Baylor_scaffold_27827	381.708	0.867096	0.989834	0.876
7000000172.a:SRS020869_Baylor_scaffold_19970	381.252	0.999774	1	0.9998
7000000509.a:SRS054590_LANL_scaffold_1726	381.239	0.419759	0.895145	0.4689
7000000609.a:SRS056519_LANL_scaffold_35840	380.682	0.780809	1	0.7808
7000000526.a:SRS019397_WUGC_scaffold_26943	379.861	0.466206	0.981214	0.4751
7000000334.a:SRS015217_WUGC_scaffold_14064	379.018	0.988827	1	0.9888
7000000258.a:SRS016335_WUGC_scaffold_45281	377.864	0.398676	0.990963	0.4023
7000000526.a:SRS019397_WUGC_scaffold_24247	377.518	0.99982	1	0.9998
7000000158.a:SRS014979_WUGC_scaffold_36395	377	0.512922	0.99902	0.5134
7000000624.a:C3238888	376.726	0.70686	0.999994	0.7069
7000000624.a:C3240237	375.912	0.978115	0.995929	0.9821
7000000630.a:SRS062427_LANL_scaffold_10819	375.812	0.789266	0.999997	0.7893
7000000300.a:SRS043701_LANL_scaffold_17582	374.556	0.704384	1	0.7044
7000000239.a:SRS013951_WUGC_scaffold_8022	369.768	0.275477	0.894324	0.308
7000000498.a:SRS017521_Baylor_scaffold_30298	368.772	0.978262	0.99555	0.9826
7000000334.a:C2390986	367	0.999921	0.999788	0.9999
7000000695.a:SRS049900_LANL_scaffold_302	367	0.631852	0.792127	0.7977
3300003146.a:Ga0051080_1009974	366.008	0.933979	0.986766	0.9465
7000000570.a:SRS051882_Baylor_scaffold_30050	364.687	0.996977	1	0.997
7000000475.a:SRS020328_Baylor_scaffold_38845	364.68	0.438037	0.987969	0.4434
7000000516.a:SRS019161_WUGC_scaffold_64473	364.342	0.786615	1	0.7866
7000000684.a:SRS019582_WUGC_scaffold_31765	363.363	0.71847	1	0.7185
7000000546.a:SRS019910_WUGC_scaffold_69936	361.657	0.941591	1	0.9416
7000000077.a:C470392	361	1	0.999976	1
7000000434.a:SRS014287_WUGC_scaffold_5928	358.814	0.409159	0.854891	0.4786
7000000736.a:SRS014235_WUGC_scaffold_11916	358.204	0.58624	0.999964	0.5863
7000000740.a:SRS064276_LANL_scaffold_54249	357.97	0.865475	0.999985	0.8655
7000000455.a:C5192154	357.915	0.998772	1	0.9988
7000000740.a:SRS064276_LANL_scaffold_56045	357.884	0.528077	0.984124	0.5366
7000000258.a:C5291617	357.273	1	1	1
7000000308.a:SRS058770_LANL_scaffold_3050	356.652	0.836347	0.997085	0.8388
7000000661.a:SRS052027_LANL_scaffold_24881	355	0.767513	0.917332	0.8367
7000000112.a:SRS011302_Baylor_scaffold_20697	353.652	0.729437	0.998889	0.7302
7000000098.a:SRS023176_Baylor_scaffold_1220	353.433	0.991432	1	0.9914
7000000131.a:SRS057717_LANL_scaffold_11310	351.522	0.793403	0.999239	0.794
7000000352.a:SRS014923_WUGC_scaffold_50647	349.727	0.844399	0.999974	0.8444
7000000111.a:SRS019601_WUGC_scaffold_48658	347.519	0.98877	0.989473	0.9993
7000000012.a:SRS018313_Baylor_scaffold_15562	347.39	0.768703	0.999694	0.7689
7000000486.a:SRS015264_WUGC_scaffold_56561	346.31	0.422091	0.999974	0.4221
7000000559.a:SRS058723_Baylor_scaffold_12543	345.928	0.736569	0.999989	0.7366
7000000045.a:SRS013687_Baylor_scaffold_14202	344.443	0.68136	0.994273	0.6853
7000000145.a:SRS050422_LANL_scaffold_83565	343.68	0.848807	0.999953	0.8488
7000000735.a:SRS015190_WUGC_scaffold_19561	343	0.437098	0.998898	0.4376
7000000546.a:SRS019910_WUGC_scaffold_71793	341.265	0.286523	0.941119	0.3044
7000000111.a:SRS019601_WUGC_scaffold_13357	341.081	0.523335	0.991314	0.5279
7000000370.a:C1745436	334.578	0.987542	0.999998	0.9875
7000000624.a:SRS024435_LANL_scaffold_23078	330.572	0.340152	0.789061	0.4311
7000000492.a:SRS048164_WUGC_scaffold_37566	329.875	0.722022	0.999965	0.722
7000000192.a:SRS017821_Baylor_scaffold_24965	328.46	0.739153	1	0.7392
7000000690.a:C1638496	326.249	0.285474	0.735325	0.3882
7000000659.a:SRS015854_WUGC_scaffold_35610	326.183	0.997924	1	0.9979
3300003146.a:Ga0051080_1008079	325.88	0.861331	1	0.8613
7000000690.a:SRS055982_Baylor_scaffold_1947	324.12	0.912827	1	0.9128
7000000609.a:SRS056519_LANL_scaffold_7746	324.119	0.676202	0.999843	0.6763
7000000352.a:SRS014923_WUGC_scaffold_38579	324	0.936258	0.985557	0.95
7000000232.a:SRS015578_WUGC_scaffold_8983	320.301	0.698601	1	0.6986
7000000333.a:SRS050925_LANL_scaffold_12390	320.279	0.833733	1	0.8337
7000000531.a:SRS049959_WUGC_scaffold_14215	319.532	0.684203	0.99321	0.6889
7000000579.a:SRS017103_Baylor_scaffold_10142	319.415	0.998397	1	0.9984
7000000077.a:SRS064645_LANL_scaffold_1093	318.344	0.962963	0.999921	0.963
7000000641.a:SRS018351_Baylor_scaffold_29504	316.505	0.60945	0.998593	0.6103
7000000464.a:SRS077730_LANL_scaffold_16842	316.13	0.788556	1	0.7886
7000000695.a:SRS049900_LANL_scaffold_19814	315.614	0.635062	0.997199	0.6368
7000000628.a:SRS015782_WUGC_scaffold_40061	314.442	0.814946	0.99576	0.8184
7000000022.a:SRS011452_WUGC_scaffold_912	314.007	0.812359	1	0.8124
7000000045.a:SRS013687_Baylor_scaffold_59607	313.937	0.79048	0.998755	0.7915
7000000187.a:SRS022609_Baylor_scaffold_56409	313.759	0.774455	0.936044	0.8274
7000000200.a:SRS023526_Baylor_scaffold_35863	313.639	0.864514	0.996769	0.8673
7000000370.a:SRS017191_Baylor_scaffold_25785	313.559	0.798975	0.999949	0.799
7000000460.a:SRS051031_LANL_scaffold_8635	312.964	0.573112	0.998929	0.5737
7000000296.a:SRS024009_Baylor_scaffold_694	312.828	0.607381	1	0.6074
7000000069.a:SRS016095_WUGC_scaffold_37872	312	0.842123	0.979436	0.8598
7000000633.a:SRS015065_WUGC_scaffold_40472	310.724	0.771395	0.999896	0.7715
7000000112.a:SRS011302_Baylor_scaffold_4048	309.844	0.303451	0.983742	0.3085
7000000231.a:SRS014613_WUGC_scaffold_31416	309	0.997632	1	0.9976
7000000231.a:SRS014613_WUGC_scaffold_28746	308	0.97499	0.999886	0.9751
7000000628.a:SRS015782_WUGC_scaffold_41754	305.393	0.986724	1	0.9867
7000000655.a:SRS019968_Baylor_scaffold_26787	301.974	0.90405	1	0.9041
7000000401.a:SRS011271_WUGC_scaffold_21242	300.513	0.400405	0.991134	0.404
7000000630.a:SRS062427_LANL_scaffold_15837	300.226	0.798987	0.999977	0.799
7000000006.a:SRS054956_LANL_scaffold_44396	300.199	0.680484	0.93706	0.7262
7000000100.a:SRS018817_WUGC_scaffold_24100	299.139	0.499822	0.990118	0.5048
7000000490.a:C1875731	299.049	0.849331	0.999995	0.8493
7000000626.a:SRS064557_LANL_scaffold_4030	297.828	0.998479	1	0.9985
7000000112.a:SRS011302_Baylor_scaffold_10199	296.33	0.613661	0.93311	0.6577
7000000538.a:SRS024075_LANL_scaffold_3043	295.565	0.310646	0.999794	0.3107
7000000690.a:SRS055982_Baylor_scaffold_7629	294.01	0.999777	1	0.9998
7000000186.a:SRS022524_Baylor_scaffold_872	294	0.976077	0.993733	0.9822
7000000040.a:SRS043411_WUGC_scaffold_12384	293.683	0.97582	1	0.9758
7000000736.a:SRS014235_WUGC_scaffold_69501	293.598	0.617546	1	0.6175
7000000296.a:SRS024009_Baylor_scaffold_15752	293.455	0.351325	0.99972	0.3514
7000000385.a:SRS017433_Baylor_scaffold_5079	292.685	0.81594	0.999999	0.8159
7000000418.a:SRS012273_Baylor_scaffold_10390	291.66	0.343884	0.981957	0.3502
7000000459.a:SRS012902_Baylor_scaffold_933	291.474	0.516579	0.999996	0.5166
7000000532.a:C4776323	291.356	0.820068	1	0.8201
7000000646.a:SRS015960_WUGC_scaffold_4748	290.267	0.774702	1	0.7747
7000000333.a:SRS050925_LANL_scaffold_59006	289.415	0.404545	0.892462	0.4533
7000000641.a:SRS018351_Baylor_scaffold_20507	288.948	0.548168	0.964739	0.5682
7000000460.a:SRS051031_LANL_scaffold_54450	288.336	0.358658	0.976958	0.3671
7000000094.a:SRS024549_LANL_scaffold_3060	288	0.913236	1	0.9132
7000000258.a:SRS016335_WUGC_scaffold_7886	287.703	0.265922	0.753817	0.3528
7000000332.a:SRS015133_WUGC_scaffold_30031	287	0.300108	0.971327	0.309
7000000460.a:SRS051031_LANL_scaffold_60087	286.391	0.72646	0.99916	0.7271
7000000192.a:SRS017821_Baylor_scaffold_15726	285.718	0.937168	1	0.9372
7000000401.a:SRS011271_WUGC_scaffold_17213	285.336	0.440755	1	0.4408
7000000045.a:SRS013687_Baylor_scaffold_18929	285	0.317174	0.913252	0.3473
7000000630.a:SRS062427_LANL_scaffold_11523	284.071	0.78598	1	0.786
7000000181.a:SRS018656_WUGC_scaffold_12815	284.036	0.397556	0.999765	0.3976
7000000218.a:SRS023829_Baylor_scaffold_10086	283	0.328356	0.999725	0.3284
7000000231.a:SRS014613_WUGC_scaffold_12192	281.699	0.719162	0.999999	0.7192
7000000632.a:SRS050299_LANL_scaffold_14531	281.033	0.999659	1	0.9997
7000000297.a:SRS056259_LANL_scaffold_8338	280.765	0.930679	0.987108	0.9428
7000000262.a:SRS047044_WUGC_scaffold_26682	280.222	1	1	1
7000000258.a:SRS016335_WUGC_scaffold_23872	280.068	0.857928	0.999999	0.8579
7000000403.a:C1508528	279.986	0.432723	0.999848	0.4328
7000000410.a:SRS019030_Baylor_scaffold_21696	279.605	0.419625	0.993514	0.4224
7000000492.a:SRS048164_WUGC_scaffold_2302	279.015	0.562766	0.987379	0.57
3300003146.a:Ga0051080_1000173	278.011	0.957143	1	0.9571
7000000348.a:C1920110	278	0.933126	0.999999	0.9331
7000000740.a:SRS064276_LANL_scaffold_37879	278	0.999841	0.997929	0.9981
7000000460.a:SRS051031_LANL_scaffold_12877	276.391	0.902154	1	0.9022
7000000418.a:SRS012273_Baylor_scaffold_6350	276	0.992433	0.999927	0.9925
7000000296.a:SRS024009_Baylor_scaffold_2001	274.795	0.886934	0.996277	0.8902
7000000740.a:SRS064276_LANL_scaffold_24763	274.277	0.661923	0.998603	0.6628
7000000684.a:SRS019582_WUGC_scaffold_74917	274.182	0.526194	0.973162	0.5407
7000000475.a:SRS020328_Baylor_scaffold_36784	273.577	0.721208	1	0.7212
7000000036.a:SRS049164_WUGC_scaffold_30020	273.523	0.624462	0.998724	0.6253
7000000444.a:SRS063985_LANL_scaffold_57495	273.367	0.791667	0.999279	0.7922
7000000333.a:SRS050925_LANL_scaffold_40147	272.863	0.278845	0.675003	0.4131
7000000486.a:SRS015264_WUGC_scaffold_3699	272.201	0.344567	0.795255	0.4333
7000000289.a:SRS024331_LANL_scaffold_42203	271.949	0.981574	0.999036	0.9825
7000000297.a:C1924856	271.801	0.648347	1	0.6483
7000000317.a:SRS014459_WUGC_scaffold_65127	271.482	0.976737	1	0.9767
7000000308.a:SRS058770_LANL_scaffold_39481	271.354	0.99909	0.999999	0.9991
7000000100.a:C2137516	271.234	0.915113	0.999998	0.9151
7000000498.a:SRS017521_Baylor_scaffold_31148	271.157	0.574497	0.999217	0.5749
7000000418.a:C3798771	271	0.984466	0.999474	0.985
7000000071.a:C3429893	270.623	0.954293	1	0.9543
7000000418.a:C3792972	270	1	0.999999	1
7000000626.a:SRS064557_LANL_scaffold_6895	269.587	0.365127	0.993449	0.3675
7000000397.a:C3569728	268.422	0.766373	0.999957	0.7664
7000000239.a:SRS013951_WUGC_scaffold_54416	267.903	0.59458	0.99981	0.5947
7000000040.a:SRS043411_WUGC_scaffold_3673	267.634	0.565178	0.986265	0.573
7000000071.a:C3430683	265.607	0.901986	0.999981	0.902
7000000736.a:SRS014235_WUGC_scaffold_50587	264.887	0.939205	0.999996	0.9392
7000000289.a:SRS024331_LANL_scaffold_50290	264.74	0.997996	0.999791	0.9982
7000000418.a:SRS012273_Baylor_scaffold_23271	264	0.843501	0.968762	0.8707
7000000441.a:SRS015794_Baylor_scaffold_27481	264	0.444132	0.992151	0.4476
7000000045.a:SRS013687_Baylor_scaffold_43641	263.474	0.999864	1	0.9999
7000000011.a:SRS053214_LANL_scaffold_26224	263.115	1	1	1
7000000633.a:SRS015065_WUGC_scaffold_42565	262.958	0.863173	0.997929	0.865
7000000659.a:SRS015854_WUGC_scaffold_21877	262.404	0.998608	1	0.9986
7000000036.a:SRS049164_WUGC_scaffold_94596	262.376	0.886464	1	0.8865
7000000306.a:SRS043001_WUGC_scaffold_29736	262.184	0.823992	0.999868	0.8241
7000000348.a:C1923832	261.676	0.992831	0.999943	0.9929
7000000317.a:SRS014459_WUGC_scaffold_78318	261.415	0.811947	0.997094	0.8143
7000000262.a:SRS047044_WUGC_scaffold_10695	261.219	0.999374	1	0.9994
7000000444.a:SRS063985_LANL_scaffold_55161	261	0.850908	0.904151	0.9411
7000000475.a:SRS020328_Baylor_scaffold_28549	260.565	0.935009	0.999733	0.9353
7000000111.a:SRS019601_WUGC_scaffold_27782	260.164	0.856632	0.999975	0.8567
7000000570.a:SRS051882_Baylor_scaffold_8717	258.709	0.381746	0.996989	0.3829
7000000444.a:SRS063985_LANL_scaffold_6656	257.966	0.461875	0.875151	0.5278
7000000075.a:SRS016056_WUGC_scaffold_1120	257.193	0.992295	1	0.9923
7000000045.a:SRS013687_Baylor_scaffold_57499	257	0.528386	0.83132	0.6356
7000000308.a:SRS058770_LANL_scaffold_31495	256.327	0.478935	0.999453	0.4792
7000000403.a:C1508552	255.892	0.973187	0.999999	0.9732
7000000641.a:SRS018351_Baylor_scaffold_32348	255.743	0.454417	0.973208	0.4669
7000000433.a:SRS050752_LANL_scaffold_33736	255.691	0.683371	0.985019	0.6938
7000000498.a:SRS017521_Baylor_scaffold_21531	255.436	0.965679	0.999994	0.9657
7000000075.a:SRS016056_WUGC_scaffold_5364	255.03	0.482254	0.984842	0.4897
7000000582.a:SRS019787_WUGC_scaffold_23775	254.822	0.830357	1	0.8304
7000000418.a:SRS012273_Baylor_scaffold_19058	254.043	0.313597	0.999369	0.3138
7000000112.a:SRS011302_Baylor_scaffold_18218	253.588	0.348086	0.99947	0.3483
7000000669.a:SRS022713_LANL_scaffold_20106	253.289	0.271138	0.776435	0.3492
7000000172.a:SRS020869_Baylor_scaffold_4639	253.208	0.350717	0.944494	0.3713
7000000187.a:SRS022609_Baylor_scaffold_67070	252.843	0.298988	0.937671	0.3189
7000000012.a:SRS018313_Baylor_scaffold_1909	252.542	0.353795	0.969861	0.3648
7000000200.a:SRS023526_Baylor_scaffold_35799	252.207	0.705214	0.999998	0.7052
7000000735.a:SRS015190_WUGC_scaffold_25958	252.158	0.921728	0.99889	0.9228
7000000272.a:SRS016203_WUGC_scaffold_8984	251.093	0.959107	0.984054	0.9746
7000000433.a:SRS050752_LANL_scaffold_20719	250.406	0.677752	0.991442	0.6836
7000000107.a:SRS042628_WUGC_scaffold_607	248.856	0.902536	0.999528	0.903
7000000492.a:SRS048164_WUGC_scaffold_10634	248.833	0.726683	0.991773	0.7327
7000000308.a:SRS058770_LANL_scaffold_18662	248.754	0.518537	0.940781	0.5512
7000000385.a:SRS017433_Baylor_scaffold_13147	247.638	0.84636	0.967929	0.8744
7000000444.a:SRS063985_LANL_scaffold_18651	247.032	0.431861	0.906536	0.4764
7000000142.a:SRS016753_Baylor_scaffold_13798	246.834	0.990005	0.997458	0.9925
7000000069.a:SRS016095_WUGC_scaffold_38565	246.571	0.761408	0.934851	0.8145
7000000410.a:SRS019030_Baylor_scaffold_9203	245.768	0.801854	1	0.8019
7000000646.a:SRS015960_WUGC_scaffold_31617	245.739	0.562219	0.999996	0.5622
7000000609.a:SRS056519_LANL_scaffold_21462	245	0.452979	0.996772	0.4544
7000000632.a:SRS050299_LANL_scaffold_30827	244.887	0.642151	0.99224	0.6472
7000000045.a:SRS013687_Baylor_scaffold_35593	244	0.496834	0.844199	0.5885
7000000526.a:SRS019397_WUGC_scaffold_24605	243.282	0.950871	1	0.9509
7000000444.a:SRS063985_LANL_scaffold_18794	242.374	0.754988	0.99998	0.755
7000000232.a:SRS015578_WUGC_scaffold_39883	241.919	0.265993	0.595971	0.4463
7000000570.a:SRS051882_Baylor_scaffold_24486	241.247	0.928584	0.984414	0.9433
7000000158.a:SRS014979_WUGC_scaffold_16138	240.947	0.889877	1	0.8899
7000000252.a:C2209264	239.977	0.920444	1	0.9204
7000000715.a:SRS014683_WUGC_scaffold_8600	239.319	0.999831	1	0.9998
7000000192.a:SRS017821_Baylor_scaffold_4645	239	0.324663	0.762063	0.426
7000000532.a:SRS011529_WUGC_scaffold_31722	238.933	0.869681	1	0.8697
7000000661.a:SRS052027_LANL_scaffold_2577	238.462	0.737022	0.933308	0.7897
7000000232.a:SRS015578_WUGC_scaffold_29761	238.076	0.585957	0.990722	0.5914
7000000187.a:SRS022609_Baylor_scaffold_11937	237.865	0.334181	0.991215	0.3371
7000000333.a:SRS050925_LANL_scaffold_41349	237.277	0.991363	1	0.9914
7000000193.a:SRS048870_WUGC_scaffold_4639	236.924	0.999926	1	0.9999
7000000193.a:SRS048870_WUGC_scaffold_50367	236.066	0.689159	0.999867	0.6893
3300002898.a:draft_10007074	235.923	0.450782	0.931848	0.4838
7000000372.a:SRS045713_WUGC_scaffold_23614	235.703	0.615004	0.996918	0.6169
7000000069.a:SRS016095_WUGC_scaffold_15442	235.555	0.934917	1	0.9349
7000000308.a:SRS058770_LANL_scaffold_14019	234.994	0.311327	0.926502	0.336
7000000736.a:SRS014235_WUGC_scaffold_14063	233.598	0.736675	0.996724	0.7391
7000000045.a:SRS013687_Baylor_scaffold_34257	233.024	0.469236	0.74577	0.6292
7000000516.a:SRS019161_WUGC_scaffold_51715	232.403	0.351829	0.860147	0.409
7000000546.a:SRS019910_WUGC_scaffold_24072	232.396	0.30868	0.867498	0.3558
7000000191.a:C3074945	231.127	0.347898	0.73135	0.4757
7000000397.a:SRS011586_WUGC_scaffold_30565	231.067	0.482667	0.998259	0.4835
7000000145.a:SRS050422_LANL_scaffold_47104	230.974	0.511307	0.814951	0.6274
7000000627.a:SRS014313_WUGC_scaffold_17472	230.369	0.99921	1	0.9992
7000000521.a:SRS023583_Baylor_scaffold_4958	229.826	0.967375	0.996495	0.9708
7000000484.a:SRS016018_WUGC_scaffold_24300	229.456	0.94394	0.999178	0.9447
7000000516.a:SRS019161_WUGC_scaffold_33948	229.239	0.301799	0.999786	0.3019
7000000172.a:SRS020869_Baylor_scaffold_17752	229	0.940395	0.995416	0.9447
7000000069.a:SRS016095_WUGC_scaffold_6087	228.77	0.965731	0.996807	0.9688
7000000370.a:SRS017191_Baylor_scaffold_7921	227.82	0.876324	1	0.8763
7000000081.a:SRS017307_Baylor_scaffold_31649	227	0.971129	0.988907	0.982
7000000188.a:SRS053398_LANL_scaffold_45878	226.493	0.620822	0.996355	0.6231
7000000186.a:SRS022524_Baylor_scaffold_36388	226	0.977705	0.990261	0.9873
7000000352.a:SRS014923_WUGC_scaffold_57338	225.757	0.825965	1	0.826
7000000418.a:C3796595	225.669	0.614223	0.999779	0.6144
7000000475.a:SRS020328_Baylor_scaffold_38663	225	0.249229	0.571442	0.4361
7000000232.a:SRS015578_WUGC_scaffold_48783	223.746	0.343849	0.847543	0.4057
7000000213.a:SRS011405_WUGC_scaffold_26546	223.371	0.308876	0.970041	0.3184
7000000334.a:SRS015217_WUGC_scaffold_23760	223	0.303802	0.850989	0.357
7000000740.a:SRS064276_LANL_scaffold_29043	222.925	0.939681	1	0.9397
7000000526.a:SRS019397_WUGC_scaffold_29299	220.485	0.621923	0.974503	0.6382
7000000582.a:SRS019787_WUGC_scaffold_10271	219.475	0.267434	0.75918	0.3523
7000000333.a:SRS050925_LANL_scaffold_73619	217.953	0.906266	0.999995	0.9063
7000000626.a:SRS064557_LANL_scaffold_32818	217.426	0.452806	0.999993	0.4528
7000000317.a:SRS014459_WUGC_scaffold_94545	217.173	0.643689	0.998663	0.6446
7000000200.a:SRS023526_Baylor_scaffold_24368	217.065	0.888397	1	0.8884
7000000006.a:SRS054956_LANL_scaffold_39961	216.889	0.614346	0.986293	0.6229
7000000628.a:SRS015782_WUGC_scaffold_41222	216.306	0.896289	0.964062	0.9297
7000000531.a:SRS049959_WUGC_scaffold_59193	215.037	0.593683	0.999323	0.5941
7000000333.a:C2246634	214.971	0.821696	0.999447	0.8222
7000000626.a:SRS064557_LANL_scaffold_27676	214.47	0.99771	1	0.9977
7000000460.a:SRS051031_LANL_scaffold_9021	213.3	0.193606	0.391306	0.4948
3300003146.a:Ga0051080_1017340	212.819	0.621508	0.996271	0.6238
7000000531.a:SRS049959_WUGC_scaffold_47592	212.38	0.829649	0.999999	0.8296
7000000320.a:SRS063040_Baylor_scaffold_59223	211.878	0.833559	1	0.8336
7000000418.a:C3799305	210.602	0.882195	0.993725	0.8878
7000000609.a:SRS056519_LANL_scaffold_5348	209.91	0.631226	0.999502	0.6315
7000000441.a:SRS015794_Baylor_scaffold_29877	209.803	0.543971	0.993027	0.5478
7000000695.a:SRS049900_LANL_scaffold_6451	209.294	0.687915	0.999833	0.688
7000000038.a:C4277215	209	0.950023	0.985857	0.9637
7000000200.a:SRS023526_Baylor_scaffold_9740	208.921	0.829477	0.999998	0.8295
3300003146.a:Ga0051080_1017446	208.025	0.831126	1	0.8311
7000000262.a:SRS047044_WUGC_scaffold_25765	207.226	0.721398	1	0.7214
7000000098.a:C940628	206.402	0.521206	0.974287	0.535
7000000486.a:SRS015264_WUGC_scaffold_57793	206.228	0.317214	0.634896	0.4996
3300003146.a:Ga0051080_1005059	206	0.99071	0.995747	0.9949
7000000069.a:SRS016095_WUGC_scaffold_33065	205.329	0.480003	0.981957	0.4888
7000000302.a:SRS023914_Baylor_scaffold_5392	204.967	0.82738	1	0.8274
7000000570.a:SRS051882_Baylor_scaffold_7329	204.787	0.315435	0.841897	0.3747
7000000403.a:SRS024388_LANL_scaffold_15622	204.709	0.972159	0.999709	0.9724
7000000320.a:SRS063040_Baylor_scaffold_59302	204	0.346417	0.984351	0.3519
7000000258.a:C5290893	204	0.92162	0.999443	0.9221
7000000486.a:SRS015264_WUGC_scaffold_19308	203.427	0.974739	0.999999	0.9747
7000000735.a:SRS015190_WUGC_scaffold_10384	203.133	0.94173	0.995329	0.9461
7000000107.a:C2756325	203.089	1	1	1
7000000317.a:C2701553	202.836	0.932857	1	0.9329
7000000186.a:SRS022524_Baylor_scaffold_62690	201	0.934596	0.964578	0.9689
7000000531.a:SRS049959_WUGC_scaffold_11451	200.177	0.667437	0.993298	0.6719
7000000188.a:SRS053398_LANL_scaffold_48035	199.552	0.514136	0.997164	0.5156
7000000380.a:SRS015663_WUGC_scaffold_24762	199.406	0.999011	1	0.999
7000000532.a:C4775941	199.135	0.405279	0.990972	0.409
3300003140.a:Ga0051081_1006379	198.374	0.784134	0.947745	0.8274
7000000093.a:SRS022137_LANL_scaffold_3859	197.71	0.947362	0.9999	0.9475
3300003155.a:Ga0052270_10012176	197	0.526185	0.980984	0.5364
7000000373.a:SRS016989_Baylor_scaffold_8433	195.217	0.965667	1	0.9657
7000000521.a:SRS023583_Baylor_scaffold_6618	195.098	0.592158	0.999793	0.5923
7000000475.a:SRS020328_Baylor_scaffold_31930	195	0.384028	0.998615	0.3846
7000000441.a:SRS015794_Baylor_scaffold_35365	194.845	0.444374	0.985836	0.4508
7000000486.a:SRS015264_WUGC_scaffold_10513	194.42	0.789522	1	0.7895
7000000158.a:SRS014979_WUGC_scaffold_24901	194.05	0.874604	1	0.8746
7000000418.a:SRS012273_Baylor_scaffold_12834	193.703	0.892226	0.999529	0.8926
7000000609.a:SRS056519_LANL_scaffold_34257	193.211	0.746269	0.999999	0.7463
7000000077.a:SRS064645_LANL_scaffold_6414	193	0.996237	0.998811	0.9974
7000000022.a:SRS011452_WUGC_scaffold_2332	192.246	0.982379	1	0.9824
7000000262.a:SRS047044_WUGC_scaffold_30445	192	0.94911	0.999866	0.9492
7000000444.a:SRS063985_LANL_scaffold_54067	191.756	0.860348	0.90575	0.9499
7000000111.a:SRS019601_WUGC_scaffold_6864	191.188	0.33941	0.963239	0.3524
7000000587.a:C751183	191.022	0.703828	0.999986	0.7038
7000000669.a:SRS022713_LANL_scaffold_23529	190.572	0.894769	0.999785	0.895
7000000715.a:SRS014683_WUGC_scaffold_52300	190.214	0.581343	0.968136	0.6005
7000000334.a:SRS015217_WUGC_scaffold_19867	190.021	0.953801	0.972875	0.9804
7000000193.a:SRS048870_WUGC_scaffold_26582	189.117	0.719486	0.994633	0.7234
7000000628.a:C3504539	188.368	0.952109	0.984697	0.9669
7000000083.a:C15592677	188.331	0.719743	1	0.7197
7000000087.a:C2385192	188.31	0.60975	0.996306	0.612
7000000532.a:SRS011529_WUGC_scaffold_13783	186.959	0.961633	1	0.9616
7000000641.a:SRS018351_Baylor_scaffold_30620	186.287	0.707252	1	0.7073
7000000232.a:SRS015578_WUGC_scaffold_34612	185.817	0.718084	0.93597	0.7672
7000000526.a:SRS019397_WUGC_scaffold_17560	185.816	0.984637	1	0.9846
7000000633.a:SRS015065_WUGC_scaffold_14802	185.352	0.797637	0.999999	0.7976
7000000380.a:SRS015663_WUGC_scaffold_13143	185.192	0.984753	1	0.9848
7000000333.a:SRS050925_LANL_scaffold_38431	184	0.897618	0.919302	0.9764
7000000549.a:SRS013521_LANL_scaffold_18007	183.292	0.823609	1	0.8236
7000000515.a:SRS049995_LANL_scaffold_21566	182.942	0.860921	0.872896	0.9863
7000000373.a:SRS016989_Baylor_scaffold_12475	182.572	0.462942	0.999461	0.4632
3300003146.a:Ga0051080_1014625	182.444	0.313509	0.93295	0.336
7000000633.a:SRS015065_WUGC_scaffold_34940	181.712	0.898231	1	0.8982
7000000455.a:C5192676	181	0.879177	0.975504	0.9013
7000000271.a:SRS053335_LANL_scaffold_31252	180.128	0.810069	0.998256	0.8115
7000000646.a:SRS015960_WUGC_scaffold_4308	179.82	0.376381	0.990381	0.38
7000000188.a:SRS053398_LANL_scaffold_41186	179.73	0.499477	0.738006	0.6768
7000000740.a:SRS064276_LANL_scaffold_35734	179.306	0.732711	1	0.7327
7000000186.a:SRS022524_Baylor_scaffold_76532	179.161	0.859153	0.966631	0.8888
7000000460.a:SRS051031_LANL_scaffold_39958	178.603	0.999295	1	0.9993
7000000333.a:C2246552	178.136	0.980826	1	0.9808
7000000352.a:C3383345	177.649	0.650279	0.990425	0.6566
7000000071.a:SRS065504_LANL_scaffold_41837	176.628	0.698079	0.99732	0.7
7000000308.a:SRS058770_LANL_scaffold_33090	176.411	0.975181	0.999998	0.9752
7000000178.a:SRS017247_LANL_scaffold_9725	176.342	0.300505	0.997169	0.3014
7000000401.a:SRS011271_WUGC_scaffold_1368	175.955	0.951558	0.998978	0.9525
7000000262.a:SRS047044_WUGC_scaffold_22477	175.45	0.987683	0.999092	0.9886
7000000570.a:C2595401	175.302	0.984596	0.999893	0.9847
7000000641.a:C2815243	174.846	0.74729	0.995797	0.7504
7000000380.a:SRS015663_WUGC_scaffold_47579	174.365	0.298662	0.648845	0.4603
7000000492.a:C2361982	174.35	0.544534	1	0.5445
7000000317.a:SRS014459_WUGC_scaffold_74064	174.224	0.804401	0.9837	0.8177
7000000475.a:SRS020328_Baylor_scaffold_36549	173.585	0.527905	0.999492	0.5282
7000000418.a:C3798077	173.564	0.883191	0.999986	0.8832
7000000498.a:SRS017521_Baylor_scaffold_48923	173	0.259276	0.65436	0.3962
7000000329.a:SRS016495_LANL_scaffold_19678	172.958	0.990925	1	0.9909
7000000641.a:SRS018351_Baylor_scaffold_1004	172.209	0.471752	0.652656	0.7228
7000000484.a:SRS016018_WUGC_scaffold_17498	172.124	0.626571	0.979192	0.6399
7000000171.a:SRS052697_LANL_scaffold_65800	172.011	0.27749	0.799221	0.3472
7000000624.a:SRS024435_LANL_scaffold_33615	169.829	0.973063	0.994644	0.9783
7000000239.a:SRS013951_WUGC_scaffold_4432	169.54	0.314952	0.989227	0.3184
7000000142.a:SRS016753_Baylor_scaffold_3218	169.39	0.998806	0.999867	0.9989
7000000296.a:C1830350	168.8	0.397097	0.983726	0.4037
7000000690.a:SRS055982_Baylor_scaffold_18510	168.664	0.326527	0.654598	0.4988
7000000045.a:SRS013687_Baylor_scaffold_37560	168.346	0.602157	0.999997	0.6022
7000000193.a:SRS048870_WUGC_scaffold_51544	168.053	0.414948	0.925683	0.4483
7000000186.a:SRS022524_Baylor_scaffold_13270	167.979	0.699076	0.9831	0.7111
7000000232.a:SRS015578_WUGC_scaffold_2456	167.869	0.680754	1	0.6808
7000000695.a:SRS049900_LANL_scaffold_14509	167	0.622114	0.765915	0.8123
7000000632.a:SRS050299_LANL_scaffold_6154	166.909	0.551498	0.769496	0.7167
7000000481.a:SRS047014_WUGC_scaffold_30051	165.523	0.601926	0.999963	0.6019
7000000333.a:SRS050925_LANL_scaffold_74052	165.285	0.503046	0.990697	0.5078
7000000515.a:SRS049995_LANL_scaffold_39163	164.628	0.697493	0.933902	0.7469
7000000187.a:SRS022609_Baylor_scaffold_90200	164.168	0.288617	0.826339	0.3493
7000000045.a:SRS013687_Baylor_scaffold_35352	164	0.452533	0.820323	0.5517
7000000112.a:SRS011302_Baylor_scaffold_3796	163.027	0.568004	0.884626	0.6421
7000000087.a:C2384586	163	0.609769	0.984266	0.6195
7000000531.a:SRS049959_WUGC_scaffold_37177	162.488	0.971136	0.998101	0.973
7000000609.a:SRS056519_LANL_scaffold_21606	162.439	0.975659	0.995646	0.9799
7000000081.a:SRS017307_Baylor_scaffold_32974	161.709	0.541743	0.994645	0.5447
7000000093.a:SRS022137_LANL_scaffold_3435	161.635	0.999867	1	0.9999
3300003155.a:Ga0052270_10359829	161.592	0.340934	0.651451	0.5233
7000000171.a:SRS052697_LANL_scaffold_54647	161.491	0.840169	0.983713	0.8541
7000000271.a:SRS053335_LANL_scaffold_9615	161.426	0.987069	0.99595	0.9911
7000000401.a:SRS011271_WUGC_scaffold_21650	161.242	0.999758	1	0.9998
7000000271.a:SRS053335_LANL_scaffold_31553	160.726	0.876759	0.999417	0.8773
7000000492.a:SRS048164_WUGC_scaffold_8644	160.597	0.695349	1	0.6953
7000000628.a:SRS015782_WUGC_scaffold_8197	160.596	0.98085	0.993574	0.9872
7000000045.a:SRS013687_Baylor_scaffold_21615	160.169	0.292546	0.921063	0.3176
7000000546.a:SRS019910_WUGC_scaffold_22870	159.347	0.869911	0.999628	0.8702
7000000403.a:SRS024388_LANL_scaffold_11717	158.138	0.994218	1	0.9942
7000000526.a:SRS019397_WUGC_scaffold_31504	157.802	0.839739	0.94343	0.8901
7000000740.a:SRS064276_LANL_scaffold_16784	157.534	0.878208	1	0.8782
7000000385.a:SRS017433_Baylor_scaffold_18739	156.746	0.789862	0.953002	0.8288
7000000532.a:SRS011529_WUGC_scaffold_31497	156.646	0.772026	1	0.772
7000000213.a:C3691715	156.607	0.912955	0.99918	0.9137
7000000320.a:C3357091	156.518	0.692756	1	0.6928
7000000187.a:SRS022609_Baylor_scaffold_26530	155.717	0.683654	0.996326	0.6862
7000000231.a:SRS014613_WUGC_scaffold_22672	155.567	0.869699	0.996838	0.8725
7000000107.a:SRS042628_WUGC_scaffold_10193	155.199	0.313298	0.993377	0.3154
7000000385.a:SRS017433_Baylor_scaffold_19041	155.091	0.248228	0.594988	0.4172
7000000475.a:SRS020328_Baylor_scaffold_9767	153.87	0.289674	0.784301	0.3693
7000000006.a:SRS054956_LANL_scaffold_40945	153.839	0.186445	0.610192	0.3056
7000000684.a:SRS019582_WUGC_scaffold_26869	153.666	0.364393	0.999918	0.3644
7000000526.a:SRS019397_WUGC_scaffold_23811	153.497	0.666895	0.995238	0.6701
7000000193.a:SRS048870_WUGC_scaffold_5147	153.416	0.778875	1	0.7789
7000000397.a:SRS011586_WUGC_scaffold_928	153.357	0.998563	1	0.9986
7000000334.a:SRS015217_WUGC_scaffold_36991	152.91	0.89957	0.979193	0.9187
7000000271.a:SRS053335_LANL_scaffold_30027	152.398	0.56281	0.943405	0.5966
7000000444.a:SRS063985_LANL_scaffold_10636	152.039	0.293084	0.639583	0.4582
7000000587.a:C751375	151.77	0.566457	0.9995	0.5667
7000000397.a:SRS011586_WUGC_scaffold_19136	151.455	0.897858	1	0.8979
7000000736.a:SRS014235_WUGC_scaffold_72751	150.788	0.429514	0.788043	0.545
7000000308.a:SRS058770_LANL_scaffold_36820	150.382	0.662283	0.998173	0.6635
7000000289.a:SRS024331_LANL_scaffold_30418	150.282	0.931304	0.952101	0.9782
7000000459.a:SRS012902_Baylor_scaffold_6075	149.026	0.624114	0.870633	0.7169
7000000532.a:SRS011529_WUGC_scaffold_13060	149.024	0.993012	1	0.993
7000000570.a:SRS051882_Baylor_scaffold_8977	148.635	0.655645	0.982079	0.6676
7000000646.a:SRS015960_WUGC_scaffold_2062	148.449	0.163063	0.446504	0.3652
7000000122.a:SRS042284_WUGC_scaffold_2929	148.363	0.582204	1	0.5822
7000000334.a:SRS015217_WUGC_scaffold_14773	148.149	0.493522	0.915555	0.539
7000000334.a:SRS015217_WUGC_scaffold_39375	147.86	0.999187	1	0.9992
7000000191.a:C3074887	146.996	0.268104	0.668132	0.4013
7000000071.a:SRS065504_LANL_scaffold_41506	146.201	0.509334	0.9741	0.5229
7000000107.a:SRS042628_WUGC_scaffold_3415	145.957	0.617862	0.999767	0.618
7000000403.a:SRS024388_LANL_scaffold_14965	145.422	0.78614	0.988329	0.7954
7000000646.a:SRS015960_WUGC_scaffold_30659	145.135	0.924248	1	0.9242
7000000187.a:SRS022609_Baylor_scaffold_11557	145.006	0.50104	0.974079	0.5144
7000000380.a:SRS015663_WUGC_scaffold_38268	145	0.912787	0.950205	0.9606
7000000434.a:SRS014287_WUGC_scaffold_33195	144.96	0.637884	0.870593	0.7327
7000000624.a:SRS024435_LANL_scaffold_33797	144.073	0.805632	1	0.8056
7000000300.a:SRS043701_LANL_scaffold_19652	143.805	0.966654	1	0.9667
7000000171.a:SRS052697_LANL_scaffold_4602	143.499	0.641448	0.855153	0.7501
3300000059.a:PaHGMunAill_c0002734	143.429	0.304678	0.932114	0.3269
7000000300.a:SRS043701_LANL_scaffold_3655	143.277	0.861946	1	0.8619
7000000243.a:C4025848	143.002	0.422507	0.991337	0.4262
7000000317.a:SRS014459_WUGC_scaffold_84421	142.917	0.74731	0.976606	0.7652
7000000429.a:SRS045645_Baylor_scaffold_16353	142.154	0.690481	0.999083	0.6911
3300003146.a:Ga0051080_1002669	141.95	0.891111	0.992733	0.8976
7000000171.a:SRS052697_LANL_scaffold_50385	140.9	0.765059	0.985888	0.776
7000000633.a:SRS015065_WUGC_scaffold_18293	140.857	1	1	1
7000000410.a:SRS019030_Baylor_scaffold_2022	140.706	0.336029	0.936129	0.359
7000000628.a:SRS015782_WUGC_scaffold_40312	140.608	0.607721	0.89551	0.6786
7000000418.a:SRS012273_Baylor_scaffold_31987	140.288	0.419714	0.943731	0.4447
3300002898.a:draft_10019077	139.632	0.791221	0.964641	0.8202
7000000370.a:SRS017191_Baylor_scaffold_16298	138.815	0.562185	0.999732	0.5623
7000000460.a:SRS051031_LANL_scaffold_37476	138.761	0.653425	0.975187	0.6701
7000000069.a:SRS016095_WUGC_scaffold_22686	138.679	0.244245	0.635883	0.3841
7000000187.a:SRS022609_Baylor_scaffold_72992	138.592	0.41793	0.72378	0.5774
7000000334.a:SRS015217_WUGC_scaffold_38815	138.532	0.985378	0.998089	0.9873
7000000460.a:SRS051031_LANL_scaffold_62496	138.228	0.494624	0.95832	0.5161
7000000158.a:C3311271	138	0.377282	0.991326	0.3806
7000000736.a:SRS014235_WUGC_scaffold_53927	137.656	0.386643	0.788018	0.4907
7000000093.a:SRS022137_LANL_scaffold_19454	137.297	0.763503	1	0.7635
7000000516.a:SRS019161_WUGC_scaffold_33698	137.005	0.296683	0.84808	0.3498
7000000740.a:SRS064276_LANL_scaffold_66376	136.658	0.769818	0.999999	0.7698
7000000142.a:SRS016753_Baylor_scaffold_5343	136.651	0.409718	0.983373	0.4166
7000000490.a:C1876331	136.632	0.616434	0.987285	0.6244
7000000407.a:SRS019267_WUGC_scaffold_10268	136.422	0.508465	0.999948	0.5085
7000000475.a:SRS020328_Baylor_scaffold_33279	136.389	0.697643	0.991432	0.7037
7000000069.a:SRS016095_WUGC_scaffold_1149	136.282	0.761752	0.999217	0.7623
7000000145.a:SRS050422_LANL_scaffold_80286	136.181	0.441722	0.982519	0.4496
7000000380.a:C3132616	136	0.885977	0.899712	0.9847
7000000258.a:SRS016335_WUGC_scaffold_29794	136	0.23552	0.611625	0.3851
3300003146.a:Ga0051080_1006611	135.054	0.90202	0.998957	0.903
7000000334.a:SRS015217_WUGC_scaffold_24320	135	0.719644	0.983471	0.7317
7000000178.a:SRS017247_LANL_scaffold_3221	134.926	0.414337	0.797303	0.5197
7000000490.a:C1877075	134.716	0.557836	0.980636	0.5689
7000000317.a:C2700717	133.719	0.861761	1	0.8618
7000000531.a:SRS049959_WUGC_scaffold_60359	132.713	0.56778	0.972878	0.5836
7000000460.a:SRS051031_LANL_scaffold_75896	132.556	0.847362	0.999999	0.8474
7000000475.a:SRS020328_Baylor_scaffold_1745	132.436	0.851356	1	0.8514
7000000498.a:SRS017521_Baylor_scaffold_55733	132.311	0.380793	0.851302	0.4473
7000000444.a:SRS063985_LANL_scaffold_40030	132	0.573921	0.761032	0.7541
7000000231.a:C1594339	132	0.854245	0.83368	0.9759
7000000300.a:SRS043701_LANL_scaffold_31205	131.798	0.471982	0.951193	0.4962
7000000317.a:SRS014459_WUGC_scaffold_77787	131.696	0.958026	1	0.958
3300003146.a:Ga0051080_1015683	131.373	0.578346	0.850332	0.6801
7000000736.a:SRS014235_WUGC_scaffold_49848	131.358	0.314596	0.754753	0.4168
7000000145.a:SRS050422_LANL_scaffold_87783	131.354	0.611319	0.975631	0.6266
7000000107.a:SRS042628_WUGC_scaffold_24205	131.331	0.307295	0.869312	0.3535
7000000646.a:SRS015960_WUGC_scaffold_18811	131.329	0.480125	0.999991	0.4801
3300002641.a:loc_101183704	131	0.150983	0.455755	0.3313
7000000036.a:SRS049164_WUGC_scaffold_4201	130.654	0.44459	0.962253	0.462
7000000006.a:SRS054956_LANL_scaffold_40515	130.479	0.259136	0.581355	0.4457
7000000308.a:SRS058770_LANL_scaffold_39961	130.042	0.646966	0.920137	0.7031
7000000272.a:C1593689	130.022	0.989926	0.999748	0.9902
7000000075.a:SRS016056_WUGC_scaffold_1464	129.579	0.999803	1	0.9998
7000000418.a:SRS012273_Baylor_scaffold_10339	129.428	0.19246	0.431052	0.4465
7000000609.a:SRS056519_LANL_scaffold_7946	129.258	0.5115	0.985729	0.5189
7000000455.a:C5192374	128.951	0.786073	0.997923	0.7877
7000000213.a:SRS011405_WUGC_scaffold_9768	128.768	0.319339	0.980154	0.3258
7000000142.a:SRS016753_Baylor_scaffold_16074	128.735	0.999833	1	0.9998
7000000258.a:SRS016335_WUGC_scaffold_45122	128.656	0.778283	0.996261	0.7812
7000000628.a:SRS015782_WUGC_scaffold_41587	128.655	0.383804	0.999992	0.3838
7000000334.a:SRS015217_WUGC_scaffold_6542	128.625	0.380063	0.925114	0.4108
7000000308.a:SRS058770_LANL_scaffold_4463	128.419	0.987158	1	0.9872
7000000441.a:C2326996	128	0.316993	0.964725	0.3286
7000000526.a:SRS019397_WUGC_scaffold_31672	127.802	0.578414	0.969009	0.5969
7000000200.a:SRS023526_Baylor_scaffold_6228	127.781	0.333715	0.983225	0.3394
3300003140.a:Ga0051081_1002146	127.299	0.847925	1	0.8479
7000000262.a:SRS047044_WUGC_scaffold_30549	127.278	0.78384	0.999998	0.7838
7000000075.a:SRS016056_WUGC_scaffold_5444	126.67	0.951244	0.997287	0.9538
7000000258.a:SRS016335_WUGC_scaffold_4444	126.189	0.373076	0.87823	0.4248
7000000549.a:C1584946	125.859	0.828914	0.999987	0.8289
7000000077.a:C469590	125.85	0.993966	0.999256	0.9947
7000000239.a:SRS013951_WUGC_scaffold_68045	125.742	0.704454	0.776646	0.907
7000000641.a:SRS018351_Baylor_scaffold_7885	125.639	0.462491	0.544887	0.8488
7000000628.a:SRS015782_WUGC_scaffold_31707	125.24	0.98626	0.98847	0.9978
7000000628.a:SRS015782_WUGC_scaffold_37471	125.192	0.245965	0.815611	0.3016
7000000715.a:SRS014683_WUGC_scaffold_51928	125.177	0.389707	0.897081	0.4344
3300003155.a:Ga0052270_10305463	125	0.601407	0.998293	0.6024
7000000429.a:C2072217	125	0.7031	0.839774	0.8372
7000000532.a:SRS011529_WUGC_scaffold_17557	124.773	0.94705	0.999991	0.9471
7000000417.a:SRS011239_Baylor_scaffold_497	124.632	0.44994	0.594918	0.7563
7000000531.a:C3986072	124.429	0.740597	0.988723	0.749
7000000053.a:SRS013215_Baylor_scaffold_5549	124.335	0.953802	1	0.9538
7000000370.a:SRS017191_Baylor_scaffold_10269	124.172	0.350055	0.929931	0.3764
7000000433.a:SRS050752_LANL_scaffold_16318	124.163	0.366269	0.891567	0.4108
7000000333.a:SRS050925_LANL_scaffold_45871	124.041	0.321882	0.879001	0.3662
7000000333.a:SRS050925_LANL_scaffold_26956	123.975	0.515463	0.848452	0.6075
7000000460.a:SRS051031_LANL_scaffold_75555	123.914	0.428441	0.939109	0.4562
7000000272.a:C1593853	123.644	0.991574	0.999612	0.992
7000000100.a:SRS018817_WUGC_scaffold_26494	123.457	0.472753	0.911338	0.5187
7000000559.a:SRS058723_Baylor_scaffold_11877	123.318	0.947566	0.990722	0.9564
7000000071.a:SRS065504_LANL_scaffold_57756	123	0.36642	0.938018	0.3906
7000000498.a:SRS017521_Baylor_scaffold_10410	123	0.261702	0.817349	0.3202
3300003140.a:Ga0051081_1001618	122.943	0.500527	0.99938	0.5008
7000000695.a:SRS049900_LANL_scaffold_13946	122.81	0.772923	0.99912	0.7736
7000000188.a:SRS053398_LANL_scaffold_7252	122.63	0.921603	1	0.9216
7000000186.a:C1708626	121.795	0.997642	1	0.9976
7000000690.a:SRS055982_Baylor_scaffold_18269	121.688	0.339308	0.964631	0.3517
7000000040.a:SRS043411_WUGC_scaffold_45481	121	0.278313	0.869343	0.3201
7000000736.a:SRS014235_WUGC_scaffold_73179	120.962	0.415433	0.972441	0.4272
7000000540.a:SRS023346_LANL_scaffold_8664	120.304	0.509176	0.980682	0.5192
7000000142.a:SRS016753_Baylor_scaffold_11431	119.94	0.292091	0.921519	0.317
7000000570.a:SRS051882_Baylor_scaffold_30	119.927	0.99539	1	0.9954
7000000071.a:SRS065504_LANL_scaffold_51345	119.675	0.41641	0.974939	0.4271
7000000011.a:SRS053214_LANL_scaffold_26325	119.134	0.670538	0.99996	0.6706
7000000333.a:SRS050925_LANL_scaffold_34226	119.1	0.553102	0.914367	0.6049
7000000158.a:SRS014979_WUGC_scaffold_36155	119.052	0.771464	0.820042	0.9408
7000000032.a:SRS024132_Baylor_scaffold_12332	118.841	0.415102	0.973327	0.4265
7000000712.a:SRS057478_LANL_scaffold_1961	118.651	0.363107	0.535968	0.6775
7000000659.a:SRS015854_WUGC_scaffold_24201	118.346	0.241988	0.731275	0.3309
7000000433.a:SRS050752_LANL_scaffold_3157	117.646	0.479432	0.641077	0.7479
7000000302.a:SRS023914_Baylor_scaffold_35417	117.384	0.667024	0.901736	0.7397
7000000460.a:SRS051031_LANL_scaffold_72468	117.015	0.781195	0.999996	0.7812
7000000684.a:SRS019582_WUGC_scaffold_92713	116.614	0.543766	0.999995	0.5438
7000000417.a:SRS011239_Baylor_scaffold_29095	116.528	0.999185	1	0.9992
7000000243.a:SRS045004_LANL_scaffold_30107	116.323	0.380952	0.994897	0.3829
7000000100.a:SRS018817_WUGC_scaffold_11631	116.206	0.933885	1	0.9339
7000000022.a:SRS011452_WUGC_scaffold_3680	116.176	0.999144	1	0.9991
7000000297.a:SRS056259_LANL_scaffold_28519	116.176	0.921794	0.974914	0.9455
7000000200.a:SRS023526_Baylor_scaffold_19095	115.178	0.973231	0.999901	0.9733
7000000372.a:SRS045713_WUGC_scaffold_39160	114.788	0.52539	0.95047	0.5528
7000000071.a:SRS065504_LANL_scaffold_51713	114.673	0.963424	0.998083	0.9653
7000000352.a:SRS014923_WUGC_scaffold_53845	114.288	1	0.999998	1
7000000380.a:C3133072	114.138	0.321103	0.674231	0.4763
7000000486.a:SRS015264_WUGC_scaffold_29242	113.928	0.875742	1	0.8757
7000000193.a:SRS048870_WUGC_scaffold_21251	113.159	0.963537	1	0.9635
7000000441.a:SRS015794_Baylor_scaffold_17960	113.134	0.332781	0.76731	0.4337
7000000475.a:SRS020328_Baylor_scaffold_20012	113	0.259261	0.642673	0.4034
7000000628.a:SRS015782_WUGC_scaffold_5869	112.964	1	1	1
7000000334.a:SRS015217_WUGC_scaffold_38268	112.655	0.991131	0.999347	0.9918
7000000632.a:SRS050299_LANL_scaffold_8422	112.393	0.400379	0.837115	0.4783
7000000690.a:SRS055982_Baylor_scaffold_15216	112.065	0.448577	0.930255	0.4822
7000000188.a:SRS053398_LANL_scaffold_30498	111.873	0.412245	0.954003	0.4321
7000000492.a:SRS048164_WUGC_scaffold_20878	111.508	0.46505	1	0.4651
7000000444.a:SRS063985_LANL_scaffold_11584	111.504	0.489087	0.634349	0.771
7000000736.a:SRS014235_WUGC_scaffold_20870	110.162	0.332218	0.943227	0.3522
7000000348.a:SRS017701_Baylor_scaffold_16869	110.125	0.375166	0.980903	0.3825
7000000475.a:SRS020328_Baylor_scaffold_26075	110	0.466017	0.96929	0.4808
7000000271.a:SRS053335_LANL_scaffold_16345	109.941	0.821567	0.998219	0.823
7000000484.a:SRS016018_WUGC_scaffold_16697	109.507	0.323645	0.956611	0.3383
7000000317.a:SRS014459_WUGC_scaffold_20415	109.192	0.778528	0.997423	0.7805
7000000736.a:C3555019	108.796	0.994568	1	0.9946
7000000460.a:SRS051031_LANL_scaffold_67044	108.466	0.548483	0.996625	0.5503
7000000239.a:SRS013951_WUGC_scaffold_14463	108.421	0.94196	1	0.942
7000000038.a:C4274425	108.268	0.667561	0.998889	0.6683
7000000289.a:SRS024331_LANL_scaffold_32242	108.003	0.484809	0.998363	0.4856
3300002898.a:draft_10002023	107.221	0.226536	0.554366	0.4086
7000000188.a:SRS053398_LANL_scaffold_43456	107.118	0.49447	0.993994	0.4975
7000000112.a:SRS011302_Baylor_scaffold_24370	106.541	0.344337	0.777191	0.4431
7000000526.a:SRS019397_WUGC_scaffold_26364	106.343	0.664876	0.972532	0.6837
7000000087.a:C2385170	106.16	0.536474	0.998908	0.5371
7000000418.a:C3800405	106	0.826398	0.826006	0.9995
7000000158.a:C3313952	105.89	0.998056	1	0.9981
7000000433.a:SRS050752_LANL_scaffold_36201	105.609	0.146777	0.433936	0.3382
7000000187.a:SRS022609_Baylor_scaffold_6575	104.605	0.374287	0.848815	0.441
7000000045.a:C2659494	104.195	0.812607	1	0.8126
7000000385.a:SRS017433_Baylor_scaffold_5006	104.174	0.562079	1	0.5621
7000000626.a:SRS064557_LANL_scaffold_32683	104	0.297013	0.971504	0.3057
7000000112.a:SRS011302_Baylor_scaffold_7985	103.565	0.76128	0.999033	0.762
7000000184.a:SRS016954_Baylor_scaffold_31634	103.489	0.486162	0.99986	0.4862
7000000475.a:SRS020328_Baylor_scaffold_36813	102.74	0.74018	0.996798	0.7426
7000000401.a:SRS011271_WUGC_scaffold_34395	102.678	0.987957	0.999829	0.9881
7000000188.a:C2348361	102.636	0.885552	0.97308	0.9101
7000000112.a:SRS011302_Baylor_scaffold_24703	102.071	0.852946	1	0.8529
7000000192.a:SRS017821_Baylor_scaffold_18745	101.685	0.672949	0.968089	0.6951
7000000192.a:C2494558	100.957	0.546622	0.999534	0.5469
7000000193.a:SRS048870_WUGC_scaffold_16176	100.884	0.474873	0.75953	0.6252
7000000187.a:SRS022609_Baylor_scaffold_91369	100.781	0.814	0.999287	0.8146
7000000191.a:C3074821	100.701	0.334271	0.857577	0.3898
7000000232.a:SRS015578_WUGC_scaffold_35829	100.678	0.310135	0.768439	0.4036
7000000186.a:SRS022524_Baylor_scaffold_63178	100.379	0.984396	0.988707	0.9956
7000000352.a:SRS014923_WUGC_scaffold_28776	100.101	0.528952	0.999908	0.529
7000000071.a:SRS065504_LANL_scaffold_56682	100.025	0.957713	0.985935	0.9714
7000000308.a:SRS058770_LANL_scaffold_31292	99.9555	0.325691	0.670886	0.4855
7000000191.a:C3073209	99.577	0.926992	0.999015	0.9279
7000000333.a:SRS050925_LANL_scaffold_48374	99.2113	0.420601	0.535437	0.7855
7000000380.a:SRS015663_WUGC_scaffold_40995	99.0954	0.773262	0.891502	0.8674
7000000258.a:C5291967	99	0.511367	0.861918	0.5933
7000000075.a:SRS016056_WUGC_scaffold_12547	98.437	0.975414	1	0.9754
7000000112.a:SRS011302_Baylor_scaffold_21195	98.4366	0.492965	0.909982	0.5417
7000000011.a:SRS053214_LANL_scaffold_12582	98.4033	0.998246	1	0.9982
7000000188.a:SRS053398_LANL_scaffold_2210	98.3213	0.262709	0.662034	0.3968
7000000317.a:SRS014459_WUGC_scaffold_86535	96.9164	0.50919	0.961295	0.5297
7000000094.a:SRS024549_LANL_scaffold_4916	96.812	0.890325	1	0.8903
7000000515.a:SRS049995_LANL_scaffold_14449	96.7629	0.172048	0.440814	0.3903
7000000460.a:SRS051031_LANL_scaffold_50634	96.3821	1	1	1
7000000193.a:SRS048870_WUGC_scaffold_38546	96.3216	0.675842	0.983646	0.6871
7000000559.a:SRS058723_Baylor_scaffold_12987	96.2395	0.368557	0.912899	0.4037
7000000142.a:C1101728	96.1404	0.97489	0.982794	0.992
7000000069.a:SRS016095_WUGC_scaffold_29050	96.1357	0.483928	0.900458	0.5374
7000000401.a:C3191677	96.1323	0.740029	0.999704	0.7402
7000000158.a:SRS014979_WUGC_scaffold_8813	95.9584	0.403506	0.681348	0.5922
7000000464.a:SRS077730_LANL_scaffold_4134	95.7534	0.267312	0.870886	0.3069
7000000006.a:SRS054956_LANL_scaffold_9774	95.0138	0.203129	0.62271	0.3262
7000000006.a:SRS054956_LANL_scaffold_14393	94.6549	0.601887	0.999979	0.6019
7000000433.a:SRS050752_LANL_scaffold_28795	94.5898	0.637906	0.995316	0.6409
7000000098.a:SRS023176_Baylor_scaffold_14121	94	0.184599	0.531948	0.347
7000000417.a:SRS011239_Baylor_scaffold_4488	93.9179	0.983857	1	0.9839
7000000538.a:SRS024075_LANL_scaffold_6803	93.5712	0.673364	0.999935	0.6734
7000000188.a:SRS053398_LANL_scaffold_35462	93.5642	0.810182	0.983507	0.8238
7000000570.a:SRS051882_Baylor_scaffold_3113	93.5608	0.771317	1	0.7713
7000000429.a:C2068191	93.4991	0.598462	0.999109	0.599
7000000372.a:SRS045713_WUGC_scaffold_39964	93.3485	0.832684	0.972194	0.8565
7000000526.a:SRS019397_WUGC_scaffold_25998	93.2367	0.521981	0.947193	0.5511
7000000112.a:SRS011302_Baylor_scaffold_14176	93.1593	0.476566	0.975316	0.4886
7000000111.a:SRS019601_WUGC_scaffold_42922	93.0862	0.875404	0.993014	0.8816
7000000075.a:SRS016056_WUGC_scaffold_13349	92.5301	0.981669	0.998576	0.9831
7000000515.a:SRS049995_LANL_scaffold_34848	92.3989	0.619763	0.83994	0.7379
7000000071.a:SRS065504_LANL_scaffold_35310	92.2279	0.727665	0.97336	0.7476
7000000348.a:SRS017701_Baylor_scaffold_17768	92.0143	0.753816	0.96898	0.7779
7000000036.a:SRS049164_WUGC_scaffold_78547	91.5362	0.761569	0.999982	0.7616
7000000317.a:SRS014459_WUGC_scaffold_44455	91.4238	0.999534	1	0.9995
7000000112.a:SRS011302_Baylor_scaffold_6142	91.1723	0.981215	1	0.9812
7000000498.a:SRS017521_Baylor_scaffold_37849	91	0.782913	0.829208	0.9442
7000000045.a:SRS013687_Baylor_scaffold_58619	90.8974	0.2032	0.647965	0.3136
7000000191.a:C3073147	90.7558	0.654047	0.962204	0.6797
7000000538.a:SRS024075_LANL_scaffold_4133	90.6953	0.402198	0.626345	0.6421
7000000038.a:C4275633	90.5604	0.99988	1	0.9999
7000000171.a:SRS052697_LANL_scaffold_67317	90.4333	0.204523	0.609582	0.3355
7000000098.a:SRS023176_Baylor_scaffold_1716	90.1285	0.417096	0.999739	0.4172
7000000372.a:C3208994	89.6912	0.66052	0.998652	0.6614
7000000289.a:SRS024331_LANL_scaffold_43108	89.5847	0.496015	0.911473	0.5442
7000000297.a:SRS056259_LANL_scaffold_7242	89.4877	0.577506	1	0.5775
7000000659.a:C5547216	89.4375	0.463233	0.91916	0.504
7000000690.a:SRS055982_Baylor_scaffold_12018	89.288	0.519297	0.983998	0.5277
7000000516.a:SRS019161_WUGC_scaffold_67209	89.1575	0.919176	0.983745	0.9344
7000000087.a:C2384524	89.0993	0.480886	0.975629	0.4929
7000000200.a:SRS023526_Baylor_scaffold_29697	89.0072	0.395802	0.819542	0.483
7000000333.a:SRS050925_LANL_scaffold_26464	89.0011	0.614809	0.888166	0.6922
7000000475.a:SRS020328_Baylor_scaffold_8726	88.9985	0.973218	1	0.9732
7000000069.a:SRS016095_WUGC_scaffold_21415	88.6561	0.950348	0.999999	0.9503
7000000401.a:SRS011271_WUGC_scaffold_1361	88.4532	0.396331	0.920472	0.4306
7000000188.a:SRS053398_LANL_scaffold_7277	88.2839	0.594233	0.86197	0.6894
7000000302.a:SRS023914_Baylor_scaffold_28174	88.165	0.530604	0.996079	0.5327
7000000498.a:SRS017521_Baylor_scaffold_56819	88.1497	1	0.999424	0.9994
7000000158.a:SRS014979_WUGC_scaffold_3578	88	0.950725	0.951416	0.9993
7000000736.a:SRS014235_WUGC_scaffold_61125	88	0.998205	0.990026	0.9918
7000000300.a:SRS043701_LANL_scaffold_31342	87.8804	0.929504	1	0.9295
7000000418.a:SRS012273_Baylor_scaffold_34301	87.789	0.631512	0.947713	0.6664
7000000486.a:SRS015264_WUGC_scaffold_13311	87.7376	0.196147	0.307896	0.6371
7000000200.a:SRS023526_Baylor_scaffold_34564	87.2863	0.760879	0.989674	0.7688
7000000641.a:SRS018351_Baylor_scaffold_29898	87	0.350035	0.856943	0.4085
7000000045.a:SRS013687_Baylor_scaffold_56407	86.9381	0.804241	0.943032	0.8528
7000000265.a:C2882465	86.4621	0.640035	0.912376	0.7015
7000000107.a:SRS042628_WUGC_scaffold_29665	86.4553	0.96193	0.99999	0.9619
7000000417.a:SRS011239_Baylor_scaffold_29039	86.214	0.795344	0.937074	0.8488
7000000111.a:SRS019601_WUGC_scaffold_29116	86.0108	0.297059	0.854053	0.3478
7000000317.a:SRS014459_WUGC_scaffold_51356	85.8151	0.974489	0.999999	0.9745
7000000715.a:C1655542	84.2114	0.39748	0.722496	0.5501
7000000142.a:SRS016753_Baylor_scaffold_15524	84.1776	0.36952	0.865929	0.4267
7000000317.a:SRS014459_WUGC_scaffold_95475	83.872	0.484068	0.889224	0.5444
7000000641.a:SRS018351_Baylor_scaffold_31785	83.6353	0.418741	0.632312	0.6622
7000000484.a:SRS016018_WUGC_scaffold_16442	83.0628	0.228838	0.601333	0.3806
7000000543.a:SRS024265_LANL_scaffold_16167	82.7937	0.982785	0.99999	0.9828
7000000057.a:SRS013818_Baylor_scaffold_11447	82.7313	0.261842	0.37601	0.6964
7000000231.a:SRS014613_WUGC_scaffold_22821	82.6165	0.536271	0.944495	0.5678
7000000695.a:SRS049900_LANL_scaffold_17222	82.4674	0.580182	0.996605	0.5822
7000000410.a:SRS019030_Baylor_scaffold_11543	82	0.237723	0.749422	0.3172
7000000231.a:SRS014613_WUGC_scaffold_12629	81.3484	0.928439	1	0.9284
7000000093.a:SRS022137_LANL_scaffold_13705	81.1969	0.882185	1	0.8822
7000000380.a:SRS015663_WUGC_scaffold_47728	81	0.416095	0.690643	0.6025
7000000145.a:SRS050422_LANL_scaffold_93314	80.5424	0.411494	0.614681	0.6694
7000000740.a:SRS064276_LANL_scaffold_64733	80.27	0.190391	0.328987	0.5787
7000000516.a:SRS019161_WUGC_scaffold_65593	80.0551	0.657461	0.897887	0.7322
7000000481.a:SRS047014_WUGC_scaffold_57424	79.9142	0.82872	1	0.8287
7000000334.a:SRS015217_WUGC_scaffold_23239	79.766	0.91512	1	0.9151
7000000582.a:SRS019787_WUGC_scaffold_7978	79.5747	0.309419	1	0.3094
7000000191.a:C3073331	79.211	0.719969	0.971892	0.7408
7000000145.a:SRS050422_LANL_scaffold_91555	79.2093	0.36636	0.942993	0.3885
7000000380.a:SRS015663_WUGC_scaffold_46672	79	0.945149	0.932511	0.9866
7000000624.a:SRS024435_LANL_scaffold_32633	78.3478	0.253306	0.752238	0.3367
7000000191.a:C3068823	78	0.636364	0.928991	0.685
7000000464.a:SRS077730_LANL_scaffold_21724	77.7397	0.464793	0.649943	0.7151
7000000272.a:C1591845	77.6587	0.914861	0.982031	0.9316
7000000200.a:C3237021	77.6524	0.448216	0.999989	0.4482
7000000370.a:SRS017191_Baylor_scaffold_189	77.5395	0.358188	0.627988	0.5704
7000000081.a:SRS017307_Baylor_scaffold_33480	77.1183	0.431838	0.881428	0.4899
7000000272.a:SRS016203_WUGC_scaffold_8803	77.0978	0.906679	1	0.9067
7000000475.a:SRS020328_Baylor_scaffold_22653	77.034	0.495334	0.950324	0.5212
7000000441.a:SRS015794_Baylor_scaffold_28104	77.023	0.115974	0.311002	0.3729
7000000100.a:SRS018817_WUGC_scaffold_10655	76.7866	0.434614	0.909237	0.478
7000000071.a:SRS065504_LANL_scaffold_45106	76.4417	0.636046	0.997688	0.6375
7000000265.a:C2879104	76.2783	0.93559	0.999997	0.9356
7000000262.a:SRS047044_WUGC_scaffold_10544	76.2727	0.669924	0.945296	0.7087
7000000633.a:SRS015065_WUGC_scaffold_41496	76.2033	0.402198	0.757517	0.5309
7000000081.a:C2526777	76.0081	0.365004	0.867026	0.421
7000000646.a:SRS015960_WUGC_scaffold_7166	75.6622	0.462299	0.923048	0.5008
7000000071.a:C3429697	75.5781	0.812248	1	0.8122
7000000188.a:SRS053398_LANL_scaffold_20168	75.518	0.997489	1	0.9975
7000000302.a:SRS023914_Baylor_scaffold_28096	75.0309	0.972934	0.999877	0.9731
7000000272.a:C1593687	75.0244	0.556003	0.992323	0.5603
7000000425.a:SRS013476_Baylor_scaffold_6128	75.0101	0.999715	1	0.9997
7000000075.a:C1204123	75	0.663534	0.738825	0.8981
7000000628.a:SRS015782_WUGC_scaffold_22286	74.655	0.971006	0.990917	0.9799
7000000684.a:SRS019582_WUGC_scaffold_57153	74.5884	0.233657	0.476901	0.4899
7000000329.a:SRS016495_LANL_scaffold_3171	74.3249	0.998733	1	0.9987
7000000332.a:SRS015133_WUGC_scaffold_43023	73.9165	0.63336	0.848854	0.7461
7000000300.a:SRS043701_LANL_scaffold_8729	73.8204	0.227385	0.498978	0.4557
7000000397.a:SRS011586_WUGC_scaffold_14006	73.6958	0.993448	0.997891	0.9955
7000000142.a:SRS016753_Baylor_scaffold_781	73.4347	0.431533	0.912011	0.4732
7000000333.a:SRS050925_LANL_scaffold_4572	73.2646	0.726424	1	0.7264
7000000429.a:C2072355	73.2606	0.425314	0.939921	0.4525
7000000262.a:SRS047044_WUGC_scaffold_27986	72.9621	0.45968	0.844684	0.5442
7000000107.a:SRS042628_WUGC_scaffold_22652	72.7792	0.275129	0.745241	0.3692
7000000464.a:C1469436	72.6512	0.510936	0.746776	0.6842
7000000191.a:C3073103	72.2536	0.83712	0.999902	0.8372
7000000417.a:SRS011239_Baylor_scaffold_28983	72.2031	0.501142	0.767097	0.6533
7000000188.a:SRS053398_LANL_scaffold_1381	72.1241	0.966344	1	0.9663
7000000444.a:SRS063985_LANL_scaffold_27186	71.8063	0.629363	0.769007	0.8184
3300003125.a:Ga0052232_100862	71.1179	0.310817	0.693511	0.4482
7000000429.a:SRS045645_Baylor_scaffold_10640	71	0.169039	0.442003	0.3824
7000000045.a:SRS013687_Baylor_scaffold_59707	70.6936	0.427759	0.929225	0.4603
7000000192.a:SRS017821_Baylor_scaffold_5619	70.687	0.834975	0.993856	0.8401
7000000498.a:SRS017521_Baylor_scaffold_6217	70.5068	0.59476	0.825862	0.7202
7000000546.a:SRS019910_WUGC_scaffold_7419	70.4865	0.709918	0.984982	0.7207
7000000142.a:C1101604	70.2628	1	1	1
7000000032.a:C3922436	70.2048	0.691298	0.957623	0.7219
7000000239.a:SRS013951_WUGC_scaffold_23277	69.7826	0.95845	0.978868	0.9791
7000000370.a:SRS017191_Baylor_scaffold_25699	69.3323	0.309505	0.806401	0.3838
3300003146.a:Ga0051080_1003502	69	0.589081	0.738557	0.7976
7000000434.a:SRS014287_WUGC_scaffold_38530	68.7024	0.632034	0.986104	0.6409
7000000385.a:SRS017433_Baylor_scaffold_1813	68.6844	0.308836	0.75856	0.4071
7000000271.a:SRS053335_LANL_scaffold_8632	68.6073	0.847268	0.999964	0.8473
7000000006.a:SRS054956_LANL_scaffold_30101	68.4359	0.495139	0.54636	0.9063
7000000087.a:C2384538	68.4037	0.634709	0.897953	0.7068
7000000521.a:SRS023583_Baylor_scaffold_11310	67.9603	0.325088	0.72516	0.4483
7000000455.a:C5191864	67.9106	0.876162	0.973169	0.9003
7000000158.a:SRS014979_WUGC_scaffold_10211	67.8447	1	1	1
7000000669.a:SRS022713_LANL_scaffold_27054	67.7602	0.246006	0.559559	0.4396
7000000521.a:SRS023583_Baylor_scaffold_5334	67.2829	0.988423	1	0.9884
7000000490.a:SRS013800_Baylor_scaffold_1112	67.1852	0.95908	1	0.9591
7000000187.a:SRS022609_Baylor_scaffold_41591	67.0092	0.673093	0.980216	0.6867
7000000231.a:SRS014613_WUGC_scaffold_3983	67	0.153099	0.433167	0.3534
7000000352.a:SRS014923_WUGC_scaffold_3972	66.8934	0.453776	0.994766	0.4562
7000000499.a:SRS016267_WUGC_scaffold_25464	66.0603	0.891984	0.999969	0.892
7000000071.a:SRS065504_LANL_scaffold_57310	66.0254	0.92975	0.966288	0.9622
7000000434.a:C2012148	66	0.849421	0.876558	0.969
7000000633.a:SRS015065_WUGC_scaffold_8912	65.9072	0.675157	0.99537	0.6783
7000000521.a:SRS023583_Baylor_scaffold_1032	65.9012	0.742716	0.988873	0.7511
7000000174.a:C7614557	65.8679	0.522457	0.836373	0.6247
7000000407.a:SRS019267_WUGC_scaffold_15187	65.6884	0.290139	0.881515	0.3291
7000000570.a:C2595871	65.6529	0.723521	0.998089	0.7249
7000000521.a:SRS023583_Baylor_scaffold_15252	65.5917	0.984746	0.99158	0.9931
7000000418.a:C3795124	65.4971	0.560658	0.999772	0.5608
7000000081.a:SRS017307_Baylor_scaffold_32312	65.2998	0.493412	0.970331	0.5085
7000000484.a:SRS016018_WUGC_scaffold_9051	65	0.149956	0.478903	0.3131
7000000348.a:SRS017701_Baylor_scaffold_15014	64.8043	0.404671	0.86796	0.4662
7000000171.a:SRS052697_LANL_scaffold_39458	64.7744	0.183222	0.495912	0.3695
7000000032.a:SRS024132_Baylor_scaffold_35916	64.7494	0.525108	0.964736	0.5443
7000000526.a:SRS019397_WUGC_scaffold_18813	64.6364	0.999792	1	0.9998
7000000418.a:SRS012273_Baylor_scaffold_24391	64.4074	0.576455	0.981196	0.5875
7000000258.a:SRS016335_WUGC_scaffold_44376	64.2597	0.996617	0.999996	0.9966
7000000475.a:SRS020328_Baylor_scaffold_38629	64.095	0.189524	0.33693	0.5625
7000000069.a:SRS016095_WUGC_scaffold_36391	64	0.222155	0.488942	0.4544
7000000410.a:SRS019030_Baylor_scaffold_7199	64	0.242098	0.700524	0.3456
7000000434.a:SRS014287_WUGC_scaffold_14223	63.973	0.718531	0.999833	0.7187
7000000243.a:SRS045004_LANL_scaffold_14976	63.9037	0.299192	0.953273	0.3139
7000000012.a:SRS018313_Baylor_scaffold_9415	63.6353	0.336748	0.674857	0.499
7000000262.a:SRS047044_WUGC_scaffold_28544	63.3017	0.293178	0.639926	0.4581
7000000486.a:SRS015264_WUGC_scaffold_69769	63.0939	0.569038	0.974349	0.584
7000000582.a:SRS019787_WUGC_scaffold_26662	62.6198	0.999518	1	0.9995
7000000372.a:SRS045713_WUGC_scaffold_4019	62.4232	0.352683	0.825466	0.4273
3300003140.a:Ga0051081_1006518	62.0401	0.604523	0.890627	0.6788
7000000262.a:SRS047044_WUGC_scaffold_22240	61.997	0.699964	1	0.7
7000000297.a:SRS056259_LANL_scaffold_11697	61.8996	0.998979	1	0.999
7000000271.a:SRS053335_LANL_scaffold_2330	61.8062	0.707203	0.998845	0.708
7000000481.a:SRS047014_WUGC_scaffold_32884	61.7992	0.844117	0.999486	0.8446
7000000231.a:SRS014613_WUGC_scaffold_27073	61.7101	0.28215	0.698965	0.4037
7000000740.a:SRS064276_LANL_scaffold_52124	61.5251	0.840069	0.996589	0.8429
7000000111.a:SRS019601_WUGC_scaffold_2156	61.3597	0.654066	0.968493	0.6753
7000000308.a:SRS058770_LANL_scaffold_3823	61.2771	0.579529	0.998448	0.5804
7000000011.a:SRS053214_LANL_scaffold_26478	61.2577	0.455489	0.939975	0.4846
7000000444.a:SRS063985_LANL_scaffold_50521	61.0375	0.231758	0.724479	0.3199
7000000243.a:C4025868	61	0.213065	0.590631	0.3607
7000000297.a:SRS056259_LANL_scaffold_54948	60.9371	0.468475	0.98274	0.4767
7000000401.a:SRS011271_WUGC_scaffold_40435	60.6508	0.912399	0.97967	0.9313
7000000633.a:SRS015065_WUGC_scaffold_39366	60.6377	0.560213	0.999709	0.5604
7000000624.a:SRS024435_LANL_scaffold_27143	60.6306	0.536209	0.6484	0.827
7000000069.a:SRS016095_WUGC_scaffold_9023	60.1998	0.431278	0.943807	0.457
7000000200.a:SRS023526_Baylor_scaffold_29673	59.9564	0.765973	0.989376	0.7742
7000000296.a:C1830682	59.8541	0.286363	0.72896	0.3928
7000000736.a:SRS014235_WUGC_scaffold_31575	59.6823	0.59822	0.973554	0.6145
7000000252.a:C2206190	59.6387	0.498303	0.960408	0.5188
7000000111.a:SRS019601_WUGC_scaffold_6393	59.5609	0.546437	1	0.5464
7000000081.a:SRS017307_Baylor_scaffold_27586	59.41	0.557565	0.928871	0.6003
7000000232.a:SRS015578_WUGC_scaffold_49577	59.3003	0.560829	0.905454	0.6194
7000000628.a:SRS015782_WUGC_scaffold_4156	59.2198	0.276048	0.678901	0.4066
7000000040.a:SRS043411_WUGC_scaffold_46143	59.1341	0.498433	0.985043	0.506
7000000403.a:C1507932	59	0.501285	0.86217	0.5814
7000000628.a:SRS015782_WUGC_scaffold_29404	58.7602	0.562672	0.993627	0.5663
7000000040.a:SRS043411_WUGC_scaffold_43800	58.7499	0.146887	0.276883	0.5305
7000000145.a:C2863755	58.7419	0.612153	0.999047	0.6127
7000000178.a:C1045184	58.4705	0.880045	1	0.88
7000000193.a:SRS048870_WUGC_scaffold_49190	58.2215	0.539026	0.999979	0.539
7000000045.a:SRS013687_Baylor_scaffold_46555	58.1631	0.538842	0.90753	0.5937
7000000296.a:C1829136	58	0.795371	0.868074	0.9162
7000000111.a:SRS019601_WUGC_scaffold_39244	57.7177	0.949584	0.985372	0.9637
7000000515.a:SRS049995_LANL_scaffold_14823	57.521	0.983609	0.994206	0.9893
7000000352.a:C3382929	57.4557	0.96441	1	0.9644
7000000695.a:SRS049900_LANL_scaffold_2587	57.4232	0.278635	0.795064	0.3505
7000000296.a:C1830654	57.312	0.706258	0.999995	0.7063
7000000053.a:C694232	57.1107	0.912329	0.94616	0.9642
7000000296.a:C1830286	57	0.516957	0.658684	0.7848
7000000684.a:SRS019582_WUGC_scaffold_84423	56.8974	0.226871	0.669622	0.3388
7000000526.a:SRS019397_WUGC_scaffold_23549	56.775	0.275953	0.701281	0.3935
7000000011.a:SRS053214_LANL_scaffold_25621	56.7547	0.222253	0.445274	0.4991
7000000401.a:C3191487	56.7468	0.890678	1	0.8907
2061766007.a:rumenHiSeq_NODE_585688_len_9270_cov_7_540021	56.73	0.275322	0.656756	0.4192
7000000630.a:SRS062427_LANL_scaffold_4175	56.6355	0.608496	0.940871	0.6467
7000000659.a:C5547346	56.6251	0.523766	0.988032	0.5301
7000000158.a:SRS014979_WUGC_scaffold_18572	56.5866	0.873275	0.996639	0.8762
7000000112.a:SRS011302_Baylor_scaffold_5768	56.3839	0.993376	1	0.9934
7000000071.a:SRS065504_LANL_scaffold_38513	56.1061	0.37392	0.77234	0.4841
7000000484.a:SRS016018_WUGC_scaffold_14315	55.9657	0.30981	0.391414	0.7915
7000000332.a:C3518214	55.9164	0.40759	0.966465	0.4217
7000000482.a:SRS016541_Baylor_scaffold_5878	55.8178	0.994714	1	0.9947
7000000231.a:SRS014613_WUGC_scaffold_2800	55.7981	0.549391	0.999989	0.5494
7000000712.a:SRS057478_LANL_scaffold_14149	55.7877	0.836495	0.999781	0.8367
7000000239.a:SRS013951_WUGC_scaffold_68373	55.497	0.934267	0.987457	0.9461
7000000433.a:SRS050752_LANL_scaffold_32075	55.382	0.470942	0.830222	0.5672
7000000087.a:C2384940	55.3065	0.687416	1	0.6874
7000000239.a:SRS013951_WUGC_scaffold_21099	55.2586	0.440693	0.905521	0.4867
7000000296.a:SRS024009_Baylor_scaffold_12580	55	0.838533	0.876121	0.9571
7000000038.a:C4272040	54.8662	0.819692	0.928822	0.8825
7000000433.a:SRS050752_LANL_scaffold_32600	54.6545	0.819393	0.98692	0.8303
7000000492.a:SRS048164_WUGC_scaffold_12104	54.4802	0.476358	0.868059	0.5488
7000000352.a:SRS014923_WUGC_scaffold_58690	54.4163	0.369071	0.967121	0.3816
7000000531.a:SRS049959_WUGC_scaffold_58889	54.3326	0.785092	0.977305	0.8033
7000000317.a:SRS014459_WUGC_scaffold_95213	54.2618	0.249259	0.78501	0.3175
7000000112.a:SRS011302_Baylor_scaffold_18748	54.0078	0.96039	1	0.9604
7000000373.a:SRS016989_Baylor_scaffold_21350	54.001	0.999869	1	0.9999
7000000655.a:SRS019968_Baylor_scaffold_26247	54	0.219444	0.654997	0.335
7000000429.a:C2069547	53.7274	0.873345	0.944124	0.925
7000000475.a:SRS020328_Baylor_scaffold_29209	53.4645	0.880067	0.999758	0.8803
7000000192.a:SRS017821_Baylor_scaffold_11510	53.3349	0.997595	1	0.9976
7000000332.a:SRS015133_WUGC_scaffold_20366	53.287	0.639645	0.83455	0.7665
7000000410.a:SRS019030_Baylor_scaffold_25174	53.2771	0.730683	0.936679	0.7801
7000000174.a:C7614445	53	0.949791	0.918073	0.9666
3300003155.a:Ga0052270_10304922	53	0.321492	0.521855	0.6161
7000000740.a:SRS064276_LANL_scaffold_18823	53	0.6402	0.801104	0.7991
7000000695.a:SRS049900_LANL_scaffold_9781	52.9312	0.830221	0.998836	0.8312
7000000579.a:C2737942	52.7528	0.246049	0.819856	0.3001
7000000628.a:SRS015782_WUGC_scaffold_11657	52.6349	0.999964	1	1
7000000145.a:SRS050422_LANL_scaffold_50261	52.5581	0.541593	0.96508	0.5612
7000000655.a:SRS019968_Baylor_scaffold_873	52.4947	0.607733	0.999961	0.6078
7000000526.a:SRS019397_WUGC_scaffold_30191	52.3501	0.586231	0.876494	0.6688
7000000232.a:SRS015578_WUGC_scaffold_33345	52.3347	0.328913	0.866746	0.3795
7000000526.a:SRS019397_WUGC_scaffold_31262	52.2172	0.673924	0.999213	0.6745
7000000296.a:C1827385	52.1538	0.547415	0.949014	0.5768
7000000641.a:SRS018351_Baylor_scaffold_7961	51.9539	0.519628	0.803052	0.6471
7000000320.a:SRS063040_Baylor_scaffold_1210	51.822	0.579084	0.998496	0.58
7000000317.a:SRS014459_WUGC_scaffold_94517	51.5371	0.238701	0.711191	0.3356
7000000158.a:SRS014979_WUGC_scaffold_34729	51.5269	0.312088	0.93128	0.3351
7000000385.a:SRS017433_Baylor_scaffold_3382	51.4082	0.550285	0.862637	0.6379
7000000302.a:SRS023914_Baylor_scaffold_23746	51.4048	0.598499	0.999837	0.5986
7000000200.a:SRS023526_Baylor_scaffold_32654	51.3828	0.667813	1	0.6678
7000000401.a:SRS011271_WUGC_scaffold_34346	51.3828	0.667813	1	0.6678
7000000036.a:SRS049164_WUGC_scaffold_60281	51.1554	0.75923	0.999998	0.7592
7000000434.a:SRS014287_WUGC_scaffold_30022	51.1104	0.773919	1	0.7739
7000000531.a:SRS049959_WUGC_scaffold_14146	51	0.448109	0.485002	0.9239
7000000306.a:SRS043001_WUGC_scaffold_44869	50.986	0.870617	0.987717	0.8814
7000000131.a:SRS057717_LANL_scaffold_15371	50.7173	0.306543	0.809476	0.3787
7000000460.a:SRS051031_LANL_scaffold_58044	50.4688	1	1	1
7000000380.a:SRS015663_WUGC_scaffold_41101	50.453	0.223556	0.502936	0.4445
7000000646.a:SRS015960_WUGC_scaffold_30066	50.3075	0.412163	0.957362	0.4305
7000000373.a:SRS016989_Baylor_scaffold_21698	50.3005	0.257062	0.609327	0.4219
7000000098.a:SRS023176_Baylor_scaffold_11636	50.1753	0.177458	0.270769	0.6554
7000000188.a:SRS053398_LANL_scaffold_10740	50.161	0.604952	0.969022	0.6243
7000000300.a:C1857542	50.0538	0.365754	0.84516	0.4328
7000000486.a:SRS015264_WUGC_scaffold_4337	50	0.212849	0.274453	0.7755
7000000022.a:SRS011452_WUGC_scaffold_3183	49.9377	0.966761	1	0.9668
7000000145.a:SRS050422_LANL_scaffold_91706	49.9315	0.477481	0.929359	0.5138
7000000045.a:SRS013687_Baylor_scaffold_58193	49.8651	0.762351	0.997653	0.7641
7000000401.a:SRS011271_WUGC_scaffold_38918	49.6105	0.322145	0.95427	0.3376
7000000171.a:SRS052697_LANL_scaffold_74265	49.341	0.598846	0.992485	0.6034
7000000317.a:SRS014459_WUGC_scaffold_28345	49.2204	0.312256	0.780017	0.4003
7000000081.a:SRS017307_Baylor_scaffold_6587	49.1687	0.596111	0.979228	0.6088
7000000187.a:SRS022609_Baylor_scaffold_86898	49.0746	0.482325	0.561757	0.8586
7000000038.a:C4277309	49.0431	0.438212	0.8942	0.4901
7000000690.a:SRS055982_Baylor_scaffold_16374	48.9775	0.89981	0.999907	0.8999
7000000464.a:SRS077730_LANL_scaffold_23497	48.966	0.57773	0.947552	0.6097
7000000418.a:C3800309	48.8727	0.340529	0.725001	0.4697
7000000320.a:C3357517	48.8215	0.224341	0.671949	0.3339
7000000641.a:SRS018351_Baylor_scaffold_28200	48.8197	0.951214	0.985569	0.9651
7000000232.a:SRS015578_WUGC_scaffold_46396	48.7161	0.469503	0.845112	0.5556
7000000661.a:C1907614	48.6908	0.773647	1	0.7736
7000000329.a:SRS016495_LANL_scaffold_18262	48.5741	0.728461	0.998198	0.7298
7000000532.a:SRS011529_WUGC_scaffold_14016	48.3202	0.710244	0.991448	0.7164
7000000735.a:SRS015190_WUGC_scaffold_13284	48.3085	0.552522	0.924916	0.5974
7000000111.a:SRS019601_WUGC_scaffold_48233	48.2843	0.206293	0.62688	0.3291
7000000444.a:SRS063985_LANL_scaffold_57029	48.1646	0.454049	0.637053	0.7127
7000000265.a:C2881719	48.088	0.725903	0.999981	0.7259
2032320001.a:PCEOT_contig05514	48	0.692549	0.793283	0.873
7000000262.a:SRS047044_WUGC_scaffold_17024	47.9892	0.823547	0.999803	0.8237
7000000006.a:SRS054956_LANL_scaffold_43423	47.7897	0.248426	0.542924	0.4576
7000000332.a:SRS015133_WUGC_scaffold_5206	47.6385	0.404298	0.755197	0.5354
7000000334.a:SRS015217_WUGC_scaffold_10576	47.1092	0.994699	1	0.9947
7000000038.a:C4276967	46.9642	0.416183	0.912699	0.456
7000000302.a:C2143741	46.9199	0.561873	0.980252	0.5732
7000000272.a:C1593137	46.8194	0.401936	0.983814	0.4085
7000000193.a:SRS048870_WUGC_scaffold_15106	46.6111	0.432881	0.821609	0.5269
3300002898.a:draft_10012892	46.4146	0.17621	0.536033	0.3287
7000000630.a:SRS062427_LANL_scaffold_13141	46.291	0.259964	0.764469	0.3401
7000000239.a:SRS013951_WUGC_scaffold_6400	46.2518	0.234094	0.331923	0.7053
7000000429.a:C2070721	46.2125	0.987531	0.99981	0.9877
7000000032.a:SRS024132_Baylor_scaffold_39159	46	0.150063	0.213527	0.7028
7000000022.a:SRS011452_WUGC_scaffold_2829	45.7919	0.999211	1	0.9992
7000000736.a:SRS014235_WUGC_scaffold_22059	45.607	0.973069	0.993809	0.9791
7000000549.a:SRS013521_LANL_scaffold_13900	45.4652	0.993429	1	0.9934
7000000252.a:C2206694	45.1408	0.44161	0.862743	0.5119
7000000407.a:C3633282	45.1096	0.470034	0.8586	0.5474
7000000609.a:SRS056519_LANL_scaffold_25052	45.0369	0.526949	0.819748	0.6428
7000000302.a:SRS023914_Baylor_scaffold_30281	45.0087	0.232184	0.694518	0.3343
7000000158.a:C3312165	45	0.260062	0.718861	0.3618
7000000526.a:SRS019397_WUGC_scaffold_31753	44.8774	0.41162	0.791458	0.5201
3300003146.a:Ga0051080_1014626	44.787	0.331004	0.732538	0.4519
7000000684.a:SRS019582_WUGC_scaffold_55899	44.774	0.803235	0.998003	0.8048
7000000484.a:SRS016018_WUGC_scaffold_15730	44.7205	0.871485	1	0.8715
7000000302.a:SRS023914_Baylor_scaffold_33088	44.559	0.765323	0.859866	0.89
7000000289.a:SRS024331_LANL_scaffold_48156	44.4336	0.263619	0.767249	0.3436
7000000297.a:SRS056259_LANL_scaffold_29087	44.3482	0.705831	0.999993	0.7058
7000000081.a:SRS017307_Baylor_scaffold_32578	44.2445	0.685647	0.84065	0.8156
7000000526.a:SRS019397_WUGC_scaffold_13411	44.1487	0.527822	0.961294	0.5491
7000000690.a:SRS055982_Baylor_scaffold_2899	43.9339	0.993181	1	0.9932
7000000401.a:SRS011271_WUGC_scaffold_5567	43.8486	0.495945	0.895848	0.5536
7000000032.a:SRS024132_Baylor_scaffold_37363	43.8321	0.576517	0.905566	0.6366
7000000646.a:SRS015960_WUGC_scaffold_15466	43.6994	0.485809	0.885573	0.5486
3300003155.a:Ga0052270_10011341	43.5981	0.589985	0.967291	0.6099
7000000296.a:SRS024009_Baylor_scaffold_6249	43.5122	0.507475	0.99089	0.5121
7000000071.a:SRS065504_LANL_scaffold_1809	43.2908	0.275915	0.522822	0.5277
7000000158.a:SRS014979_WUGC_scaffold_12241	43.1371	0.175342	0.435619	0.4025
7000000296.a:SRS024009_Baylor_scaffold_686	43.0116	0.826836	1	0.8268
7000000193.a:SRS048870_WUGC_scaffold_50634	43.0086	0.290062	0.665348	0.436
7000000232.a:SRS015578_WUGC_scaffold_43146	43	0.566193	0.628935	0.9002
7000000232.a:SRS015578_WUGC_scaffold_14706	42.9315	0.318326	0.497977	0.6392
7000000633.a:SRS015065_WUGC_scaffold_34200	42.7263	0.320468	0.776423	0.4127
7000000192.a:C2499092	42.6141	0.404395	0.96164	0.4205
7000000172.a:SRS020869_Baylor_scaffold_8760	42.3707	0.354119	0.671272	0.5275
3300003146.a:Ga0051080_1003233	42	0.788647	0.843173	0.9353
7000000498.a:SRS017521_Baylor_scaffold_17378	42	0.331617	0.500999	0.6619
7000000045.a:SRS013687_Baylor_scaffold_59644	41.9134	0.478644	0.856059	0.5591
7000000069.a:SRS016095_WUGC_scaffold_10870	41.8583	0.689816	0.896562	0.7694
7000000579.a:SRS017103_Baylor_scaffold_2643	41.7933	0.917051	0.972087	0.9434
7000000243.a:SRS045004_LANL_scaffold_32934	41.6418	0.303248	0.757794	0.4002
7000000262.a:SRS047044_WUGC_scaffold_28283	41.2467	0.363405	0.768697	0.4728
7000000246.a:SRS078176_LANL_scaffold_28310	41.1554	0.333505	0.743477	0.4486
7000000429.a:C2071375	41.1341	0.385767	0.677093	0.5697
7000000181.a:C1765908	41.0917	0.286217	0.81445	0.3514
7000000515.a:C2637932	41.0483	0.809272	1	0.8093
7000000246.a:SRS078176_LANL_scaffold_6277	41.0483	0.809272	1	0.8093
3300003155.a:Ga0052270_10012109	41	0.536612	0.579603	0.9258
7000000684.a:SRS019582_WUGC_scaffold_92776	40.9336	0.192671	0.605168	0.3184
7000000231.a:SRS014613_WUGC_scaffold_7076	40.853	0.346139	0.993663	0.3483
7000000531.a:SRS049959_WUGC_scaffold_27524	40.8253	0.545442	0.944318	0.5776
7000000243.a:SRS045004_LANL_scaffold_34514	40.4996	0.278435	0.63332	0.4396
7000000516.a:SRS019161_WUGC_scaffold_61227	40.4616	0.139608	0.445427	0.3134
7000000081.a:SRS017307_Baylor_scaffold_27277	40.3552	0.99914	1	0.9991
7000000265.a:C2882543	40.2674	0.711324	0.902501	0.7882
7000000626.a:SRS064557_LANL_scaffold_21019	40.1013	0.40523	0.577665	0.7015
7000000006.a:SRS054956_LANL_scaffold_45793	40.0589	0.52646	0.710204	0.7413
7000000011.a:SRS053214_LANL_scaffold_9915	40.0358	0.332893	0.70245	0.4739
7000000231.a:SRS014613_WUGC_scaffold_33929	40	0.342641	0.455829	0.7517
7000000735.a:C1342355	40	0.621351	0.767948	0.8091
7000000100.a:SRS018817_WUGC_scaffold_28234	39.8555	0.514072	0.99753	0.5153
7000000579.a:C2738758	39.6939	0.994354	0.99882	0.9955
7000000112.a:SRS011302_Baylor_scaffold_24263	39.4463	0.324485	0.717625	0.4522
7000000186.a:SRS022524_Baylor_scaffold_18063	39.3878	0.426723	0.882621	0.4835
7000000401.a:SRS011271_WUGC_scaffold_33760	39.2854	0.619221	0.858518	0.7213
7000000429.a:C2069907	39.2567	0.281642	0.690211	0.4081
7000000045.a:SRS013687_Baylor_scaffold_54183	39.0777	0.47186	0.984772	0.4792
7000000302.a:SRS023914_Baylor_scaffold_27312	39.0777	0.47186	0.984772	0.4792
7000000188.a:SRS053398_LANL_scaffold_47090	39	0.185586	0.216748	0.8562
7000000178.a:SRS017247_LANL_scaffold_15920	38.8785	0.564618	0.693868	0.8137
7000000012.a:SRS018313_Baylor_scaffold_15519	38.8459	0.306893	0.945475	0.3246
7000000661.a:SRS052027_LANL_scaffold_8937	38.5662	0.995157	1	0.9952
7000000587.a:C749959	38.5259	0.610182	0.761796	0.801
7000000045.a:SRS013687_Baylor_scaffold_20620	38.1908	0.211604	0.442698	0.478
7000000715.a:SRS014683_WUGC_scaffold_14693	38.0736	0.207732	0.572198	0.363
7000000032.a:SRS024132_Baylor_scaffold_25752	38.0045	0.496833	0.997671	0.498
7000000484.a:C1316717	38	0.383256	0.448663	0.8542
7000000131.a:SRS057717_LANL_scaffold_17935	38	0.658644	0.820751	0.8025
7000000040.a:SRS043411_WUGC_scaffold_30879	37.9588	0.930058	0.995845	0.9339
7000000265.a:C2882667	37.9587	0.288963	0.715084	0.4041
7000000172.a:SRS020869_Baylor_scaffold_7251	37.9204	0.691571	0.995761	0.6945
7000000111.a:SRS019601_WUGC_scaffold_31950	37.8968	0.734077	0.985303	0.745
7000000715.a:SRS014683_WUGC_scaffold_25597	37.8531	0.427896	0.90786	0.4713
7000000425.a:C3134482	37.8265	0.861134	1	0.8611
7000000032.a:SRS024132_Baylor_scaffold_36807	37.8265	0.861134	1	0.8611
7000000380.a:SRS015663_WUGC_scaffold_16964	37.7812	0.657901	0.919907	0.7152
7000000302.a:SRS023914_Baylor_scaffold_33737	37.6972	0.316626	0.846764	0.3739
7000000131.a:SRS057717_LANL_scaffold_2749	37.4402	0.71316	1	0.7132
7000000200.a:SRS023526_Baylor_scaffold_18117	37.3152	0.379215	0.820885	0.462
7000000192.a:C2496624	37.2771	0.273066	0.818958	0.3334
7000000490.a:C1876875	37	0.522706	0.520168	0.9951
7000000145.a:SRS050422_LANL_scaffold_79493	36.9999	0.44192	0.915283	0.4828
7000000334.a:SRS015217_WUGC_scaffold_6982	36.8297	0.773986	1	0.774
7000000317.a:C2699781	36.7319	0.957024	0.991842	0.9649
7000000107.a:C2757942	36.6876	0.999289	1	0.9993
7000000715.a:SRS014683_WUGC_scaffold_32086	36.5554	0.115574	0.285504	0.4048
7000000093.a:SRS022137_LANL_scaffold_941	36.5402	0.496404	0.973692	0.5098
7000000172.a:SRS020869_Baylor_scaffold_18816	36.5351	0.388163	0.989765	0.3922
7000000516.a:SRS019161_WUGC_scaffold_62502	36.4456	0.499187	0.878592	0.5682
7000000094.a:SRS024549_LANL_scaffold_18643	36.391	0.536318	0.819453	0.6545
7000000434.a:SRS014287_WUGC_scaffold_36376	36.2773	0.557059	0.695003	0.8015
7000000145.a:SRS050422_LANL_scaffold_82453	36.1868	0.484608	0.926556	0.523
7000000108.a:C2493864	36.1409	0.466595	0.858653	0.5434
7000000038.a:C4276709	36.0185	0.409712	0.891184	0.4597
7000000464.a:C1468428	36	0.167088	0.475465	0.3514
3300000589.a:Draft_100005	36	0.351346	0.696635	0.5043
7000000289.a:SRS024331_LANL_scaffold_48910	36	0.387448	0.463712	0.8355
7000000186.a:SRS022524_Baylor_scaffold_29966	35.9907	0.656536	0.997996	0.6579
7000000538.a:SRS024075_LANL_scaffold_4520	35.9352	0.412607	0.793498	0.52
7000000570.a:SRS051882_Baylor_scaffold_24810	35.9129	0.719493	0.957447	0.7515
7000000624.a:SRS024435_LANL_scaffold_7502	35.8101	0.222752	0.434765	0.5123
7000000271.a:SRS053335_LANL_scaffold_22231	35.5511	0.197962	0.540446	0.3663
7000000100.a:SRS018817_WUGC_scaffold_24206	35.4529	0.60468	1	0.6047
7000000516.a:C2641989	35.3099	0.6375	0.821536	0.776
7000000332.a:SRS015133_WUGC_scaffold_34758	35.2307	0.954679	0.999995	0.9547
7000000333.a:SRS050925_LANL_scaffold_42130	35.1212	0.142519	0.429063	0.3322
7000000172.a:SRS020869_Baylor_scaffold_9123	35.0468	0.811184	0.981342	0.8266
7000000087.a:C2383728	34.9476	0.366551	0.854485	0.429
7000000188.a:SRS053398_LANL_scaffold_10547	34.8573	0.596649	0.781577	0.7634
7000000444.a:SRS063985_LANL_scaffold_14948	34.8125	0.429329	0.857279	0.5008
7000000352.a:SRS014923_WUGC_scaffold_59717	34.8009	0.998429	1	0.9984
7000000444.a:SRS063985_LANL_scaffold_25379	34.5979	0.301554	0.808989	0.3728
7000000334.a:SRS015217_WUGC_scaffold_13989	34.5894	0.189092	0.277656	0.681
7000000526.a:SRS019397_WUGC_scaffold_10964	34.5476	0.447999	0.90157	0.4969
7000000538.a:SRS024075_LANL_scaffold_10956	34.4793	0.456606	0.997009	0.458
7000000334.a:SRS015217_WUGC_scaffold_29141	34.3188	0.574347	0.733859	0.7826
7000000628.a:C3498135	34.2676	0.727653	0.972878	0.7479
7000000373.a:SRS016989_Baylor_scaffold_21089	34.238	0.445958	0.760728	0.5862
7000000418.a:SRS012273_Baylor_scaffold_8590	34.1555	0.554799	0.826202	0.6715
7000000232.a:SRS015578_WUGC_scaffold_37012	34.1414	0.45418	0.999781	0.4543
7000000531.a:SRS049959_WUGC_scaffold_59786	34	0.429404	0.5929	0.7242
7000000187.a:SRS022609_Baylor_scaffold_27984	34	0.205748	0.497558	0.4135
7000000296.a:C1829446	33.9675	0.84162	0.998868	0.8426
7000000200.a:SRS023526_Baylor_scaffold_3422	33.8427	0.999763	1	0.9998
7000000410.a:SRS019030_Baylor_scaffold_39506	33.7849	0.631148	0.902711	0.6992
7000000187.a:SRS022609_Baylor_scaffold_14461	33.7828	0.517883	0.589141	0.879
7000000296.a:SRS024009_Baylor_scaffold_5004	33.2852	0.360277	0.951188	0.3788
7000000332.a:SRS015133_WUGC_scaffold_23394	33.2677	0.151311	0.501451	0.3017
7000000171.a:SRS052697_LANL_scaffold_45449	33.2524	0.277941	0.880634	0.3156
7000000071.a:SRS065504_LANL_scaffold_46432	33.1516	0.553269	0.848879	0.6518
7000000526.a:C1476727	33	0.12526	0.35314	0.3547
7000000736.a:SRS014235_WUGC_scaffold_34968	33	0.139171	0.191409	0.7271
7000000633.a:SRS015065_WUGC_scaffold_39492	33	0.34293	0.406459	0.8437
7000000499.a:SRS016267_WUGC_scaffold_4909	32.9839	0.667507	0.872998	0.7646
7000000624.a:C3236958	32.9789	0.407476	0.839326	0.4855
7000000045.a:SRS013687_Baylor_scaffold_59516	32.9112	0.342966	0.998393	0.3435
7000000433.a:SRS050752_LANL_scaffold_50824	32.8884	0.358062	0.834403	0.4291
7000000736.a:SRS014235_WUGC_scaffold_69972	32.5753	0.804866	0.999999	0.8049
7000000410.a:SRS019030_Baylor_scaffold_34574	32.572	0.43468	0.510758	0.851
7000000308.a:SRS058770_LANL_scaffold_39596	32.4524	0.202573	0.615339	0.3292
7000000735.a:SRS015190_WUGC_scaffold_1890	32.2998	0.321426	0.998635	0.3219
7000000498.a:SRS017521_Baylor_scaffold_41320	32.2429	0.339248	0.771835	0.4395
7000000646.a:SRS015960_WUGC_scaffold_30554	32.1277	0.219742	0.63966	0.3435
7000000038.a:C4270540	32.1235	0.301214	0.88454	0.3405
7000000516.a:C2640542	32.0985	0.378233	0.690822	0.5475
7000000333.a:SRS050925_LANL_scaffold_73295	32	0.110515	0.256735	0.4305
7000000329.a:SRS016495_LANL_scaffold_10098	32	0.180101	0.40972	0.4396
7000000418.a:SRS012273_Baylor_scaffold_36981	32	0.394765	0.414105	0.9533
7000000145.a:SRS050422_LANL_scaffold_87171	31.6897	0.556262	0.898756	0.6189
7000000243.a:SRS045004_LANL_scaffold_34408	31.6862	0.153361	0.499262	0.3072
7000000302.a:SRS023914_Baylor_scaffold_21606	31.6617	1	1	1
7000000087.a:C2385188	31.5645	0.623709	0.998591	0.6246
7000000486.a:SRS015264_WUGC_scaffold_13179	31.4723	0.626905	0.973751	0.6438
7000000142.a:SRS016753_Baylor_scaffold_15999	31.458	0.489098	0.999898	0.4891
3300003146.a:Ga0051080_1010888	31.3537	0.32417	0.649225	0.4993
7000000526.a:SRS019397_WUGC_scaffold_26363	31.329	0.431114	0.672686	0.6409
7000000492.a:SRS048164_WUGC_scaffold_42030	31.3277	0.497129	0.995168	0.4995
7000000370.a:SRS017191_Baylor_scaffold_1360	31.3118	0.232712	0.641782	0.3626
7000000531.a:SRS049959_WUGC_scaffold_28175	31.2769	0.227303	0.607746	0.374
7000000531.a:C3985590	31	0.722397	0.727226	0.9934
7000000333.a:SRS050925_LANL_scaffold_8294	31	0.142912	0.324129	0.4409
7000000320.a:C3352396	30.9942	0.611037	0.979056	0.6241
7000000570.a:SRS051882_Baylor_scaffold_1184	30.9864	0.122064	0.157835	0.7734
7000000418.a:SRS012273_Baylor_scaffold_29382	30.9597	0.478267	0.998089	0.4792
7000000531.a:SRS049959_WUGC_scaffold_60116	30.9184	0.987236	1	0.9872
7000000417.a:SRS011239_Baylor_scaffold_29524	30.8193	0.455508	0.690854	0.6593
7000000531.a:SRS049959_WUGC_scaffold_27121	30.8095	0.525538	0.946358	0.5553
7000000434.a:SRS014287_WUGC_scaffold_39220	30.531	0.198093	0.646448	0.3064
7000000736.a:SRS014235_WUGC_scaffold_71148	30.3859	0.389321	0.508266	0.766
7000000296.a:C1829082	30.2398	0.305015	0.830042	0.3675
7000000433.a:SRS050752_LANL_scaffold_38608	30.1896	0.616097	0.915966	0.6726
7000000081.a:C2525560	30.0521	0.242621	0.595959	0.4071
7000000659.a:C5545944	30	0.45788	0.671672	0.6817
7000000515.a:SRS049995_LANL_scaffold_41244	30	0.247429	0.560511	0.4414
7000000087.a:C2384208	29.9449	0.345812	0.670909	0.5154
7000000624.a:SRS024435_LANL_scaffold_16411	29.9046	0.923839	1	0.9238
7000000186.a:SRS022524_Baylor_scaffold_75256	29.7905	0.610131	0.986478	0.6185
7000000172.a:C3443772	29.6838	0.844354	0.989397	0.8534
7000000077.a:SRS064645_LANL_scaffold_3059	29.6572	0.823284	0.999002	0.8241
7000000040.a:SRS043411_WUGC_scaffold_49100	29.6458	0.408616	0.999958	0.4086
7000000320.a:SRS063040_Baylor_scaffold_34718	29.4998	0.496771	0.960327	0.5173
7000000142.a:SRS016753_Baylor_scaffold_13388	29.3961	0.966515	1	0.9665
7000000200.a:C3237195	29.3939	0.469209	0.68725	0.6827
7000000740.a:SRS064276_LANL_scaffold_28959	29.3602	0.189206	0.495839	0.3816
7000000712.a:SRS057478_LANL_scaffold_8835	29.2528	0.696125	0.981527	0.7092
7000000087.a:C2383996	29.2517	0.741097	0.820492	0.9032
7000000401.a:C3194985	29.1492	0.128402	0.36142	0.3553
7000000069.a:SRS016095_WUGC_scaffold_36376	29.1171	0.403029	0.981364	0.4107
7000000403.a:SRS024388_LANL_scaffold_13028	29.0828	0.369532	0.860637	0.4294
7000000040.a:C1641951	29.0567	0.923376	0.989686	0.933
7000000492.a:SRS048164_WUGC_scaffold_9867	29	0.447862	0.757584	0.5912
7000000669.a:SRS022713_LANL_scaffold_9658	29	0.101534	0.212938	0.4768
7000000410.a:SRS019030_Baylor_scaffold_32140	28.9743	0.207676	0.5721	0.363
7000000188.a:SRS053398_LANL_scaffold_13506	28.8587	0.956926	1	0.9569
7000000546.a:SRS019910_WUGC_scaffold_64065	28.6321	0.155989	0.413132	0.3776
7000000111.a:SRS019601_WUGC_scaffold_48652	28.5996	0.98224	0.987871	0.9943
7000000069.a:SRS016095_WUGC_scaffold_37270	28.2615	0.628122	0.886906	0.7082
7000000145.a:SRS050422_LANL_scaffold_71829	28.2335	0.33405	0.433501	0.7706
7000000372.a:SRS045713_WUGC_scaffold_42195	28.153	0.257903	0.621478	0.415
7000000526.a:SRS019397_WUGC_scaffold_31708	28.1117	0.338919	0.577907	0.5865
7000000429.a:C2072421	28.0683	0.835089	1	0.8351
7000000191.a:C3070209	28.0501	0.5024	0.770724	0.6519
7000000200.a:SRS023526_Baylor_scaffold_5493	28.0472	0.759034	1	0.759
7000000582.a:SRS019787_WUGC_scaffold_25006	28	0.236216	0.430362	0.5489
7000000425.a:SRS013476_Baylor_scaffold_7443	27.877	1	1	1
7000000333.a:SRS050925_LANL_scaffold_18651	27.748	0.135929	0.257038	0.5288
7000000145.a:SRS050422_LANL_scaffold_32447	27.7093	0.232072	0.600062	0.3867
7000000684.a:SRS019582_WUGC_scaffold_71208	27.6078	0.343453	0.749168	0.4584
7000000192.a:SRS017821_Baylor_scaffold_25048	27.5943	0.683562	0.970647	0.7042
7000000011.a:SRS053214_LANL_scaffold_7507	27.5844	0.539816	0.90339	0.5975
7000000549.a:SRS013521_LANL_scaffold_19124	27.5807	0.291138	0.497098	0.5857
7000000243.a:C4025416	27.4848	0.272759	0.89673	0.3042
7000000093.a:C1837826	27.43	0.581808	0.921794	0.6312
7000000317.a:C2697711	27.3373	0.442931	0.657206	0.674
7000000475.a:SRS020328_Baylor_scaffold_34917	27.2443	0.428863	0.915284	0.4686
7000000546.a:SRS019910_WUGC_scaffold_398	27.2231	0.127406	0.229856	0.5543
7000000740.a:SRS064276_LANL_scaffold_34993	27.1991	0.940778	1	0.9408
7000000460.a:SRS051031_LANL_scaffold_69379	27.1793	0.751147	0.885295	0.8485
7000000352.a:SRS014923_WUGC_scaffold_58879	27.1747	0.35164	0.83482	0.4212
7000000333.a:SRS050925_LANL_scaffold_66715	27.1182	0.701362	0.999118	0.702
7000000100.a:C2136894	27	0.370895	0.618475	0.5997
7000000531.a:SRS049959_WUGC_scaffold_59413	26.9129	0.792148	0.98894	0.801
7000000252.a:C2208984	26.8699	0.316698	0.76793	0.4124
7000000172.a:SRS020869_Baylor_scaffold_20162	26.855	0.624491	0.937024	0.6665
7000000684.a:SRS019582_WUGC_scaffold_26286	26.7768	0.19019	0.446078	0.4264
7000000006.a:SRS054956_LANL_scaffold_30248	26.7157	0.245838	0.570265	0.4311
7000000540.a:SRS023346_LANL_scaffold_8800	26.6417	0.272039	0.744896	0.3652
7000000187.a:SRS022609_Baylor_scaffold_87617	26.6266	0.649956	0.845234	0.769
7000000258.a:SRS016335_WUGC_scaffold_22616	26.5731	0.394927	0.66357	0.5952
7000000100.a:SRS018817_WUGC_scaffold_11933	26.5364	0.25295	0.462782	0.5466
7000000434.a:SRS014287_WUGC_scaffold_24156	26.4664	0.650857	0.940307	0.6922
7000000684.a:SRS019582_WUGC_scaffold_20317	26.3033	0.721743	0.951032	0.7589
7000000740.a:SRS064276_LANL_scaffold_19707	26.2999	0.263811	0.857109	0.3078
7000000297.a:SRS056259_LANL_scaffold_20335	26.223	0.483972	0.926936	0.5221
7000000111.a:SRS019601_WUGC_scaffold_21474	26.172	0.735599	0.941891	0.781
7000000735.a:SRS015190_WUGC_scaffold_3750	26.1612	0.676108	0.827539	0.817
7000000434.a:SRS014287_WUGC_scaffold_25417	26.1236	0.965889	1	0.9659
7000000111.a:SRS019601_WUGC_scaffold_47198	26.1097	0.772264	0.994611	0.7764
7000000077.a:SRS064645_LANL_scaffold_2444	26.0639	0.559856	0.97758	0.5727
7000000032.a:SRS024132_Baylor_scaffold_31646	26.0585	0.591501	0.876388	0.6749
7000000627.a:C2700453	26.0294	0.436645	0.485215	0.8999
7000000475.a:SRS020328_Baylor_scaffold_37987	25.7995	0.761706	1	0.7617
7000000516.a:SRS019161_WUGC_scaffold_54354	25.7667	0.186491	0.498823	0.3739
7000000011.a:SRS053214_LANL_scaffold_22404	25.7248	0.347722	0.59402	0.5854
7000000509.a:SRS054590_LANL_scaffold_12310	25.6833	0.260522	0.519129	0.5018
7000000192.a:SRS017821_Baylor_scaffold_23917	25.5667	0.715793	0.999724	0.716
7000000735.a:SRS015190_WUGC_scaffold_19149	25.5244	0.654547	0.999932	0.6546
7000000045.a:SRS013687_Baylor_scaffold_40450	25.5164	0.293788	0.836436	0.3512
7000000333.a:SRS050925_LANL_scaffold_62226	25.361	0.463626	0.797296	0.5815
7000000075.a:SRS016056_WUGC_scaffold_13002	25.3448	0.424863	0.880165	0.4827
7000000429.a:C2069677	25.3006	0.377206	0.788686	0.4783
7000000546.a:SRS019910_WUGC_scaffold_45359	25.2738	0.479457	0.783311	0.6121
7000000262.a:SRS047044_WUGC_scaffold_29602	25.264	0.378777	0.488944	0.7747
7000000486.a:SRS015264_WUGC_scaffold_3668	25.1384	0.999923	1	0.9999
7000000038.a:C4274351	25.1367	0.463411	0.91377	0.5071
7000000187.a:SRS022609_Baylor_scaffold_89137	25.0188	0.539927	0.637988	0.8463
7000000191.a:C3069553	25.0086	0.563373	0.947868	0.5944
7000000352.a:SRS014923_WUGC_scaffold_54192	25	0.147713	0.467379	0.316
7000000609.a:SRS056519_LANL_scaffold_32078	25	0.703704	0.754711	0.9324
7000000334.a:C2391372	25	0.289179	0.30876	0.9366
7000000433.a:SRS050752_LANL_scaffold_24340	24.945	0.369737	0.802713	0.4606
7000000231.a:SRS014613_WUGC_scaffold_33953	24.6598	0.27825	0.517972	0.5372
7000000191.a:C3067501	24.6347	0.363061	0.764966	0.4746
7000000410.a:SRS019030_Baylor_scaffold_26421	24.5202	0.636314	0.985015	0.646
7000000531.a:SRS049959_WUGC_scaffold_6459	24.4809	0.240579	0.657308	0.366
7000000258.a:SRS016335_WUGC_scaffold_35177	24.2862	0.341062	0.521023	0.6546
7000000188.a:SRS053398_LANL_scaffold_46385	24.2694	0.947797	0.999959	0.9478
7000000370.a:SRS017191_Baylor_scaffold_9720	24.2161	0.255497	0.406631	0.6283
7000000531.a:SRS049959_WUGC_scaffold_58606	24.1966	0.203068	0.302843	0.6705
7000000098.a:SRS023176_Baylor_scaffold_12944	24	0.431998	0.446617	0.9673
7000000187.a:C3371772	24	0.131855	0.366217	0.36
7000000145.a:SRS050422_LANL_scaffold_95325	24	0.583484	0.609448	0.9574
7000000193.a:SRS048870_WUGC_scaffold_36338	24	0.133939	0.209753	0.6386
7000000526.a:SRS019397_WUGC_scaffold_31587	23.9773	0.381057	0.647556	0.5885
7000000684.a:SRS019582_WUGC_scaffold_92928	23.948	0.5875	0.999852	0.5876
7000000142.a:SRS016753_Baylor_scaffold_16227	23.9431	0.966689	1	0.9667
7000000661.a:SRS052027_LANL_scaffold_16369	23.8708	0.84128	0.999909	0.8414
7000000332.a:SRS015133_WUGC_scaffold_4808	23.8535	0.608235	0.998629	0.6091
7000000633.a:C2482074	23.8073	0.441386	0.910318	0.4849
7000000655.a:SRS019968_Baylor_scaffold_23336	23.7307	0.939355	0.999978	0.9394
7000000627.a:SRS014313_WUGC_scaffold_2536	23.6368	0.727542	0.954028	0.7626
7000000579.a:SRS017103_Baylor_scaffold_90	23.5607	0.232934	0.731768	0.3183
7000000239.a:SRS013951_WUGC_scaffold_61504	23.5375	0.433543	0.822445	0.5271
7000000669.a:SRS022713_LANL_scaffold_3154	23.4853	0.282766	0.882636	0.3204
7000000459.a:SRS012902_Baylor_scaffold_1208	23.439	0.993431	1	0.9934
7000000370.a:SRS017191_Baylor_scaffold_21101	23.3015	0.521151	0.84704	0.6153
7000000486.a:SRS015264_WUGC_scaffold_10685	23.299	0.208317	0.460588	0.4523
7000000317.a:SRS014459_WUGC_scaffold_60608	23.277	0.280609	0.435801	0.6439
7000000184.a:SRS016954_Baylor_scaffold_3818	23.2059	0.256827	0.847477	0.303
7000000628.a:SRS015782_WUGC_scaffold_34642	23.1616	0.721501	0.999959	0.7215
7000000158.a:SRS014979_WUGC_scaffold_34530	23.0748	0.720742	0.760974	0.9471
7000000077.a:C470268	23.0137	0.765651	0.984351	0.7778
7000000334.a:SRS015217_WUGC_scaffold_14508	22.9966	0.658253	1	0.6583
7000000669.a:SRS022713_LANL_scaffold_25646	22.8221	0.862662	0.898061	0.9606
7000000407.a:SRS019267_WUGC_scaffold_20499	22.8128	0.499656	0.997065	0.5011
7000000410.a:SRS019030_Baylor_scaffold_39474	22.8044	0.351711	0.46042	0.7639
7000000111.a:SRS019601_WUGC_scaffold_46695	22.7401	0.797028	0.860582	0.9261
7000000006.a:SRS054956_LANL_scaffold_45327	22.725	0.335286	0.452939	0.7402
7000000464.a:SRS077730_LANL_scaffold_2448	22.7152	0.353084	0.523249	0.6748
7000000297.a:SRS056259_LANL_scaffold_43308	22.6595	0.478702	0.835758	0.5728
7000000659.a:SRS015854_WUGC_scaffold_39874	22.6473	0.760926	0.916535	0.8302
7000000302.a:SRS023914_Baylor_scaffold_9706	22.5278	0.247569	0.436318	0.5674
7000000570.a:SRS051882_Baylor_scaffold_4501	22.5107	0.495339	0.86008	0.5759
7000000191.a:C3072743	22.485	0.308734	0.60875	0.5072
7000000334.a:SRS015217_WUGC_scaffold_38988	22.4834	0.952939	0.999774	0.9532
7000000040.a:SRS043411_WUGC_scaffold_50233	22.464	0.519366	0.862913	0.6019
7000000632.a:SRS050299_LANL_scaffold_14425	22.3703	0.137868	0.379931	0.3629
7000000481.a:SRS047014_WUGC_scaffold_73994	22.2925	0.97962	0.998425	0.9812
7000000093.a:SRS022137_LANL_scaffold_10104	22.26	0.350671	0.592723	0.5916
7000000370.a:SRS017191_Baylor_scaffold_10469	22.2293	0.999421	1	0.9994
7000000646.a:C1933956	22.2177	0.898681	1	0.8987
7000000302.a:SRS023914_Baylor_scaffold_16486	22.1257	0.295138	0.927591	0.3182
7000000401.a:SRS011271_WUGC_scaffold_832	22.1234	0.895744	0.999737	0.896
7000000022.a:SRS011452_WUGC_scaffold_16370	22.0191	0.230996	0.433207	0.5332
7000000418.a:SRS012273_Baylor_scaffold_39237	22	0.10518	0.110931	0.9482
3300003155.a:Ga0052270_10359846	22	0.110351	0.205141	0.5379
7000000239.a:SRS013951_WUGC_scaffold_19453	22	0.125528	0.412242	0.3045
7000000075.a:SRS016056_WUGC_scaffold_2661	21.9945	0.988624	0.991352	0.9972
7000000332.a:SRS015133_WUGC_scaffold_42997	21.9386	0.306306	0.564803	0.5423
7000000100.a:SRS018817_WUGC_scaffold_8497	21.9199	0.181804	0.214892	0.846
7000000011.a:SRS053214_LANL_scaffold_27249	21.8209	0.262568	0.496924	0.5284
7000000498.a:SRS017521_Baylor_scaffold_19097	21.764	0.393199	0.614228	0.6402
7000000192.a:SRS017821_Baylor_scaffold_11436	21.7579	0.771093	0.995222	0.7748
7000000659.a:SRS015854_WUGC_scaffold_35050	21.7483	0.738552	0.841199	0.878
3300003146.a:Ga0051080_1009782	21.6054	0.175548	0.493224	0.3559
7000000531.a:C3986182	21.5697	0.934381	0.996822	0.9374
7000000418.a:C3798363	21.5379	0.281064	0.387376	0.7256
7000000433.a:SRS050752_LANL_scaffold_46098	21.4603	0.17208	0.399609	0.4306
7000000296.a:C1828125	21.3224	0.27726	0.839058	0.3304
7000000736.a:SRS014235_WUGC_scaffold_21072	21.2968	0.177567	0.551003	0.3223
7000000532.a:SRS011529_WUGC_scaffold_14582	21.285	0.568672	0.87222	0.652
7000000193.a:SRS048870_WUGC_scaffold_33021	21.2789	0.820463	1	0.8205
7000000289.a:SRS024331_LANL_scaffold_18524	21.2217	0.995409	0.999927	0.9955
7000000441.a:SRS015794_Baylor_scaffold_30528	21.1803	0.999459	1	0.9995
3300002641.a:loc_105631300	21.1512	0.175923	0.43493	0.4045
7000000434.a:SRS014287_WUGC_scaffold_38968	21.1073	0.859962	0.893566	0.9624
7000000380.a:SRS015663_WUGC_scaffold_3007	21.0986	0.233913	0.559855	0.4178
7000000107.a:SRS042628_WUGC_scaffold_36725	21.0953	0.667159	0.943276	0.7073
7000000186.a:SRS022524_Baylor_scaffold_27158	20.9751	0.68072	0.951556	0.7154
7000000441.a:SRS015794_Baylor_scaffold_18589	20.9718	0.839434	0.98115	0.8556
7000000684.a:SRS019582_WUGC_scaffold_1909	20.9438	0.900175	0.987501	0.9116
7000000006.a:SRS054956_LANL_scaffold_3235	20.8831	0.317901	0.471562	0.6741
7000000262.a:C1618816	20.8755	0.984731	0.991939	0.9927
7000000516.a:C2644291	20.8525	0.624858	0.721347	0.8662
7000000736.a:SRS014235_WUGC_scaffold_4140	20.8501	0.334694	0.6968	0.4803
7000000302.a:SRS023914_Baylor_scaffold_35797	20.8491	0.999831	1	0.9998
7000000100.a:SRS018817_WUGC_scaffold_21311	20.8269	0.932644	1	0.9326
7000000191.a:C3073934	20.7776	0.536802	0.979438	0.5481
7000000012.a:C7960207	20.745	0.228335	0.397911	0.5738
7000000332.a:SRS015133_WUGC_scaffold_13419	20.7247	0.729397	0.992006	0.7353
7000000094.a:C981944	20.7234	0.643574	0.99903	0.6442
7000000433.a:SRS050752_LANL_scaffold_25295	20.7203	0.371383	0.998957	0.3718
7000000628.a:SRS015782_WUGC_scaffold_32577	20.658	0.37914	0.50607	0.7492
7000000740.a:SRS064276_LANL_scaffold_40809	20.5691	0.691415	0.961712	0.7189
7000000407.a:SRS019267_WUGC_scaffold_3426	20.5653	0.563034	0.997462	0.5645
7000000112.a:C3413655	20.5521	0.354307	0.950074	0.3729
7000000087.a:C2383988	20.4937	0.480489	0.794196	0.605
7000000086.a:SRS049147_LANL_scaffold_44533	20.4263	0.225763	0.306313	0.737
7000000735.a:SRS015190_WUGC_scaffold_27270	20.42	0.488135	0.975491	0.5004
7000000300.a:SRS043701_LANL_scaffold_13453	20.3606	0.100349	0.241505	0.4155
7000000289.a:SRS024331_LANL_scaffold_20834	20.3541	0.551914	0.668428	0.8257
7000000142.a:C1101850	20.3145	0.366653	0.992977	0.3692
7000000239.a:SRS013951_WUGC_scaffold_8981	20.294	0.294781	0.800844	0.3681
7000000433.a:SRS050752_LANL_scaffold_11947	20.1985	0.722202	0.913382	0.7907
7000000484.a:SRS016018_WUGC_scaffold_24455	20.1214	0.742491	0.751009	0.9887
7000000200.a:SRS023526_Baylor_scaffold_1575	20.0831	0.414989	0.797133	0.5206
7000000521.a:SRS023583_Baylor_scaffold_9444	20.0018	0.103747	0.233338	0.4446
7000000045.a:SRS013687_Baylor_scaffold_50138	20	0.229686	0.368064	0.624
3300003122.a:Ga0052257_118548	20	0.117361	0.219047	0.5358
7000000624.a:SRS024435_LANL_scaffold_20867	19.9725	0.380693	0.810879	0.4695
7000000232.a:C2670102	19.9611	0.279461	0.615691	0.4539
7000000538.a:SRS024075_LANL_scaffold_23814	19.8917	0.366624	0.405608	0.9039
7000000333.a:SRS050925_LANL_scaffold_21160	19.8458	0.988122	1	0.9881
7000000609.a:SRS056519_LANL_scaffold_7009	19.7706	0.191659	0.385371	0.4973
7000000172.a:SRS020869_Baylor_scaffold_12718	19.7597	0.710177	0.986694	0.7198
7000000515.a:SRS049995_LANL_scaffold_21538	19.6979	0.895468	1	0.8955
7000000187.a:SRS022609_Baylor_scaffold_78074	19.6654	0.138303	0.354394	0.3903
7000000213.a:SRS011405_WUGC_scaffold_21930	19.6279	0.129309	0.345041	0.3748
7000000192.a:SRS017821_Baylor_scaffold_5867	19.5327	0.439289	0.999881	0.4393
7000000317.a:SRS014459_WUGC_scaffold_95766	19.5251	0.343193	0.51269	0.6694
7000000661.a:C1906798	19.4981	0.142488	0.365344	0.39
7000000006.a:SRS054956_LANL_scaffold_36166	19.4958	0.326727	0.484932	0.6738
7000000410.a:SRS019030_Baylor_scaffold_40312	19.4663	0.132792	0.353871	0.3753
7000000158.a:SRS014979_WUGC_scaffold_1793	19.215	0.794432	0.999998	0.7944
7000000193.a:SRS048870_WUGC_scaffold_43658	19.0343	0.272205	0.341002	0.7983
7000000296.a:C1828936	19	0.56275	0.536832	0.9539
7000000582.a:SRS019787_WUGC_scaffold_26282	19	0.312116	0.320377	0.9742
7000000111.a:SRS019601_WUGC_scaffold_28783	19	0.408185	0.492245	0.8292
7000000464.a:SRS077730_LANL_scaffold_24503	19	0.285301	0.29079	0.9811
7000000661.a:SRS052027_LANL_scaffold_24399	18.8802	1	0.999999	1
7000000181.a:C1763895	18.8596	0.350818	0.861943	0.407
7000000193.a:SRS048870_WUGC_scaffold_8930	18.8531	0.357887	0.651478	0.5493
7000000187.a:SRS022609_Baylor_scaffold_82887	18.833	0.426046	0.912827	0.4667
7000000669.a:SRS022713_LANL_scaffold_22469	18.8171	0.702917	0.975382	0.7207
7000000300.a:SRS043701_LANL_scaffold_29572	18.7786	0.221121	0.373506	0.592
7000000094.a:C982364	18.6776	0.308667	0.406513	0.7593
7000000265.a:C2880637	18.6233	0.71113	0.94572	0.7519
7000000171.a:SRS052697_LANL_scaffold_69835	18.6231	0.44904	0.521292	0.8614
7000000302.a:C2138165	18.6229	0.788014	0.999997	0.788
7000000200.a:C3236715	18.6175	0.385262	0.990094	0.3891
7000000484.a:SRS016018_WUGC_scaffold_24808	18.5576	0.739572	0.829039	0.8921
7000000186.a:SRS022524_Baylor_scaffold_72544	18.482	0.932335	1	0.9323
7000000372.a:SRS045713_WUGC_scaffold_8679	18.4753	0.629802	0.999997	0.6298
7000000459.a:C542565	18.4059	0.290096	0.515017	0.5633
7000000410.a:SRS019030_Baylor_scaffold_15832	18.3717	0.999861	1	0.9999
7000000243.a:C4025902	18.3688	0.227392	0.284923	0.7981
7000000444.a:SRS063985_LANL_scaffold_57793	18.2873	0.631359	0.766108	0.8241
7000000736.a:SRS014235_WUGC_scaffold_51081	18.2838	0.110134	0.294872	0.3735
7000000329.a:SRS016495_LANL_scaffold_2726	18.2509	0.995929	1	0.9959
7000000360.a:SRS016585_Baylor_scaffold_4329	18.0252	0.27368	0.435669	0.6282
7000000093.a:C1839549	18	0.477895	0.486011	0.9833
7000000334.a:SRS015217_WUGC_scaffold_39092	18	0.284263	0.282238	0.9929
7000000492.a:C2358112	18	0.396572	0.56112	0.7068
7000000641.a:C2812144	17.9935	0.718278	0.999625	0.7185
7000000736.a:SRS014235_WUGC_scaffold_9343	17.9855	0.849315	0.999997	0.8493
7000000641.a:SRS018351_Baylor_scaffold_10421	17.8756	0.406122	0.751062	0.5407
7000000317.a:C2697063	17.8749	0.385111	0.586093	0.6571
7000000077.a:SRS064645_LANL_scaffold_6232	17.8592	0.306247	0.814733	0.3759
7000000740.a:SRS064276_LANL_scaffold_71227	17.8192	0.10742	0.255498	0.4204
7000000641.a:SRS018351_Baylor_scaffold_26239	17.7336	0.764923	1	0.7649
7000000397.a:SRS011586_WUGC_scaffold_17969	17.7293	0.433968	0.876319	0.4952
7000000111.a:SRS019601_WUGC_scaffold_45906	17.6504	0.287155	0.520772	0.5514
7000000145.a:SRS050422_LANL_scaffold_87828	17.6365	0.327516	0.725607	0.4514
7000000040.a:SRS043411_WUGC_scaffold_10108	17.4859	0.487928	0.999389	0.4882
7000000098.a:SRS023176_Baylor_scaffold_7732	17.3173	0.361576	0.545125	0.6633
7000000538.a:C1598091	17.2988	0.572935	0.56466	0.9856
7000000526.a:SRS019397_WUGC_scaffold_18840	17.2942	0.370573	0.762052	0.4863
7000000193.a:SRS048870_WUGC_scaffold_42492	17.2611	0.639713	0.744331	0.8594
7000000352.a:SRS014923_WUGC_scaffold_57963	17.254	0.193379	0.284458	0.6798
7000000690.a:SRS055982_Baylor_scaffold_5141	17.0832	0.802605	0.974909	0.8233
7000000289.a:SRS024331_LANL_scaffold_44504	17.0664	0.426604	0.973172	0.4384
7000000515.a:SRS049995_LANL_scaffold_4188	17.0567	0.374731	0.777505	0.482
7000000186.a:SRS022524_Baylor_scaffold_22004	17.0329	0.335348	0.509468	0.6582
7000000071.a:SRS065504_LANL_scaffold_50919	17.0126	0.54793	0.901461	0.6078
7000000641.a:C2814963	17	0.291201	0.38865	0.7493
7000000464.a:SRS077730_LANL_scaffold_23674	17	0.444685	0.524368	0.848
7000000348.a:SRS017701_Baylor_scaffold_21322	16.7503	0.974296	0.999223	0.9751
7000000429.a:C2070989	16.7083	0.490027	0.897639	0.5459
7000000352.a:SRS014923_WUGC_scaffold_32536	16.6871	0.950154	1	0.9502
7000000735.a:SRS015190_WUGC_scaffold_25626	16.5914	0.12845	0.227259	0.5652
7000000081.a:C2526575	16.478	0.519322	0.995652	0.5216
7000000094.a:SRS024549_LANL_scaffold_10014	16.4507	0.349225	0.851617	0.4101
7000000317.a:SRS014459_WUGC_scaffold_67928	16.4378	0.650935	1	0.6509
7000000213.a:C3692227	16.3773	0.2043	0.296008	0.6902
7000000486.a:SRS015264_WUGC_scaffold_17419	16.3511	0.212243	0.342678	0.6194
7000000417.a:SRS011239_Baylor_scaffold_6136	16.3448	0.995938	0.99947	0.9965
7000000332.a:SRS015133_WUGC_scaffold_36904	16.3172	0.275021	0.533891	0.5151
7000000011.a:C1593468	16.2867	0.354272	0.640296	0.5533
7000000193.a:SRS048870_WUGC_scaffold_41496	16.229	0.534198	0.724995	0.7368
7000000352.a:SRS014923_WUGC_scaffold_48177	16.1601	0.114899	0.332907	0.3451
7000000158.a:SRS014979_WUGC_scaffold_17287	16.1227	0.532693	0.956725	0.5568
7000000455.a:C5189444	16.0611	0.151816	0.502716	0.302
7000000498.a:SRS017521_Baylor_scaffold_33659	16	0.426016	0.434278	0.981
7000000265.a:C2881849	16	0.311102	0.348326	0.8931
7000000218.a:SRS023829_Baylor_scaffold_16712	16	0.369273	0.46581	0.7928
7000000433.a:SRS050752_LANL_scaffold_27063	16	0.200406	0.242014	0.8281
3300003155.a:Ga0052270_10303955	16	0.178065	0.318266	0.5595
7000000320.a:SRS063040_Baylor_scaffold_54797	16	0.324986	0.311457	0.9584
7000000490.a:C1875089	16	0.362969	0.407909	0.8898
7000000484.a:C1313927	15.7995	0.321333	0.945423	0.3399
7000000171.a:C3376773	15.7162	0.139443	0.293755	0.4747
7000000036.a:SRS049164_WUGC_scaffold_13311	15.6672	0.960749	0.997267	0.9634
7000000100.a:SRS018817_WUGC_scaffold_29059	15.5695	0.59613	0.999215	0.5966
7000000186.a:SRS022524_Baylor_scaffold_20632	15.5321	0.695918	0.868927	0.8009
7000000040.a:C1643922	15.5283	0.163615	0.379561	0.4311
7000000187.a:SRS022609_Baylor_scaffold_68866	15.5159	0.374436	0.825127	0.4538
7000000075.a:C1201909	15.5156	0.951545	0.990374	0.9608
7000000582.a:SRS019787_WUGC_scaffold_26543	15.5011	0.725675	0.766586	0.9466
7000000317.a:C2694353	15.4298	0.204113	0.612787	0.3331
7000000532.a:SRS011529_WUGC_scaffold_18079	15.416	0.669912	0.963739	0.6951
7000000516.a:SRS019161_WUGC_scaffold_20428	15.4006	1	1	1
7000000538.a:SRS024075_LANL_scaffold_24294	15.3885	0.574012	0.560602	0.9766
7000000100.a:SRS018817_WUGC_scaffold_2138	15.318	0.330057	0.999669	0.3302
3300003140.a:Ga0051081_1003926	15.2588	0.738516	0.752988	0.9808
7000000333.a:SRS050925_LANL_scaffold_73763	15.208	0.352075	0.823351	0.4276
7000000484.a:SRS016018_WUGC_scaffold_18800	15.1742	0.393264	0.992316	0.3963
7000000081.a:SRS017307_Baylor_scaffold_15004	15.1138	0.946251	0.999994	0.9463
7000000038.a:C4272154	15.0062	0.425562	0.855607	0.4974
7000000317.a:C2697151	15	0.182613	0.374772	0.4873
7000000417.a:SRS011239_Baylor_scaffold_10449	15	0.189088	0.251885	0.7507
7000000417.a:SRS011239_Baylor_scaffold_30119	15	0.39458	0.460813	0.8563
7000000690.a:SRS055982_Baylor_scaffold_18390	15	0.345753	0.429052	0.8059
7000000397.a:C3568496	15	0.100034	0.33336	0.3001
7000000401.a:SRS011271_WUGC_scaffold_40876	14.993	0.261897	0.772341	0.3391
7000000200.a:SRS023526_Baylor_scaffold_35780	14.993	0.261897	0.772341	0.3391
7000000191.a:C3066951	14.9547	0.303575	0.619035	0.4904
7000000628.a:SRS015782_WUGC_scaffold_17979	14.8975	0.252301	0.429137	0.5879
7000000081.a:C2526667	14.8516	0.471198	0.828983	0.5684
7000000380.a:SRS015663_WUGC_scaffold_23536	14.8014	0.174963	0.497336	0.3518
7000000200.a:SRS023526_Baylor_scaffold_8259	14.7456	0.723353	1	0.7234
7000000200.a:SRS023526_Baylor_scaffold_30045	14.5136	0.204803	0.397996	0.5146
3300003140.a:Ga0051081_1006146	14.4858	0.409219	0.515448	0.7939
7000000193.a:SRS048870_WUGC_scaffold_38753	14.4489	0.648145	0.822877	0.7877
7000000655.a:SRS019968_Baylor_scaffold_8866	14.418	0.340566	0.766137	0.4445
7000000570.a:SRS051882_Baylor_scaffold_2043	14.3475	0.256082	0.363093	0.7053
7000000352.a:SRS014923_WUGC_scaffold_8812	14.3339	0.494079	0.639686	0.7724
7000000086.a:SRS049147_LANL_scaffold_13615	14.2742	0.124927	0.182379	0.685
7000000108.a:C2493692	14.2367	0.991949	0.998752	0.9932
7000000684.a:SRS019582_WUGC_scaffold_92874	14.1563	0.133061	0.228481	0.5824
3300003146.a:Ga0051080_1011891	14.121	0.638741	0.646937	0.9873
7000000410.a:SRS019030_Baylor_scaffold_15838	14.1115	0.529094	0.888111	0.5958
7000000418.a:C3794804	14.0779	0.454026	0.660094	0.6878
7000000100.a:C2137016	14	0.305025	0.386208	0.7898
7000000385.a:C1840579	14	0.117378	0.271048	0.4331
7000000100.a:SRS018817_WUGC_scaffold_2525	14	0.123019	0.150681	0.8164
7000000433.a:SRS050752_LANL_scaffold_49906	14	0.275538	0.353611	0.7792
7000000178.a:C1045644	13.9111	0.225403	0.257573	0.8751
7000000442.a:SRS051791_LANL_scaffold_55671	13.8765	0.105028	0.205177	0.5119
7000000549.a:SRS013521_LANL_scaffold_2260	13.8422	0.455906	0.750211	0.6077
7000000081.a:SRS017307_Baylor_scaffold_32950	13.823	0.221707	0.642755	0.3449
7000000372.a:SRS045713_WUGC_scaffold_15000	13.8089	0.347646	0.999197	0.3479
7000000333.a:SRS050925_LANL_scaffold_72543	13.6728	0.62823	0.99774	0.6297
7000000289.a:C2398211	13.6708	0.409639	0.757073	0.5411
7000000191.a:C3073572	13.6345	0.236156	0.420876	0.5611
7000000193.a:C1912417	13.6288	0.563602	0.974003	0.5786
7000000410.a:SRS019030_Baylor_scaffold_30956	13.6032	0.264369	0.878347	0.301
7000000669.a:SRS022713_LANL_scaffold_7528	13.565	0.655505	1	0.6555
7000000628.a:SRS015782_WUGC_scaffold_41745	13.556	0.626405	0.796784	0.7862
7000000258.a:SRS016335_WUGC_scaffold_18394	13.5071	0.396441	0.806075	0.4918
7000000736.a:SRS014235_WUGC_scaffold_73409	13.473	0.251301	0.575227	0.4369
7000000289.a:SRS024331_LANL_scaffold_49128	13.468	0.481382	0.749757	0.6421
7000000265.a:C2882851	13.2391	0.259311	0.331652	0.7819
7000000418.a:SRS012273_Baylor_scaffold_35153	13.2298	0.569204	0.981906	0.5797
7000000246.a:C2341818	13.0364	0.505174	0.828854	0.6095
7000000515.a:SRS049995_LANL_scaffold_24566	13.0155	0.378345	0.623055	0.6072
7000000094.a:SRS024549_LANL_scaffold_11833	13	0.430282	0.421425	0.9794
7000000625.a:SRS045313_LANL_scaffold_4048	13	0.108047	0.141373	0.7643
7000000682.a:SRS019587_WUGC_scaffold_8592	13	0.146177	0.17938	0.8149
7000000107.a:SRS042628_WUGC_scaffold_33285	13	0.151834	0.320507	0.4737
7000000111.a:SRS019601_WUGC_scaffold_27071	13	0.205805	0.289157	0.7117
7000000112.a:SRS011302_Baylor_scaffold_7798	12.9751	0.405099	0.564108	0.7181
7000000585.a:C20416963	12.9711	0.428764	0.543855	0.7884
7000000630.a:SRS062427_LANL_scaffold_553	12.9359	0.758017	1	0.758
7000000332.a:SRS015133_WUGC_scaffold_42816	12.9058	0.487242	0.878111	0.5549
7000000570.a:SRS051882_Baylor_scaffold_14761	12.9029	0.34	0.462474	0.7352
7000000246.a:C2341974	12.7127	0.482402	0.696895	0.6922
7000000111.a:SRS019601_WUGC_scaffold_46715	12.6922	0.437005	0.767471	0.5694
7000000684.a:SRS019582_WUGC_scaffold_85053	12.613	0.128812	0.237664	0.542
7000000112.a:SRS011302_Baylor_scaffold_24746	12.5701	0.22932	0.289166	0.793
7000000661.a:SRS052027_LANL_scaffold_64	12.5315	0.999515	1	0.9995
7000000464.a:SRS077730_LANL_scaffold_13615	12.4756	0.285488	0.567019	0.5035
7000000352.a:SRS014923_WUGC_scaffold_8449	12.3997	0.1844	0.558224	0.3303
7000000641.a:SRS018351_Baylor_scaffold_23235	12.3969	0.28378	0.431148	0.6582
7000000509.a:SRS054590_LANL_scaffold_5067	12.3855	0.206653	0.636453	0.3247
7000000429.a:SRS045645_Baylor_scaffold_18668	12.3744	0.148333	0.205008	0.7235
7000000444.a:SRS063985_LANL_scaffold_5082	12.3689	0.368875	0.673804	0.5475
7000000484.a:SRS016018_WUGC_scaffold_8407	12.3463	0.147668	0.282121	0.5234
7000000736.a:SRS014235_WUGC_scaffold_47534	12.3418	0.998853	1	0.9989
7000000633.a:SRS015065_WUGC_scaffold_39006	12.3239	0.35497	0.458884	0.7736
7000000045.a:SRS013687_Baylor_scaffold_58284	12.244	0.857217	0.887778	0.9656
7000000646.a:SRS015960_WUGC_scaffold_11156	12.2109	0.999913	1	0.9999
7000000515.a:SRS049995_LANL_scaffold_14408	12.126	0.161471	0.48173	0.3352
7000000373.a:SRS016989_Baylor_scaffold_1176	12.0983	0.93281	1	0.9328
7000000334.a:SRS015217_WUGC_scaffold_38977	12.0785	0.99879	1	0.9988
7000000425.a:C3130780	12	0.103145	0.308625	0.3342
7000000587.a:C751159	11.9893	0.26924	0.267879	0.9949
7000000624.a:C3237654	11.9123	0.130821	0.419396	0.3119
7000000486.a:SRS015264_WUGC_scaffold_10677	11.8652	0.907527	0.992151	0.9147
7000000655.a:SRS019968_Baylor_scaffold_4282	11.835	0.426309	0.800564	0.5325
7000000740.a:SRS064276_LANL_scaffold_71101	11.8195	0.246267	0.242574	0.985
7000000740.a:SRS064276_LANL_scaffold_71048	11.8052	0.188101	0.29216	0.6438
7000000632.a:SRS050299_LANL_scaffold_31577	11.8037	0.120474	0.355843	0.3386
7000000334.a:SRS015217_WUGC_scaffold_25508	11.7994	0.431536	0.818605	0.5272
7000000045.a:SRS013687_Baylor_scaffold_32297	11.7955	0.539846	0.998039	0.5409
7000000278.a:SRS018133_Baylor_scaffold_31686	11.7538	0.867143	0.999448	0.8676
7000000418.a:SRS012273_Baylor_scaffold_33626	11.6961	0.291409	0.658439	0.4426
[truncated: 56 more rows]

## Sheet: 3.Donor-sample3
#IMG/VR-ID	EstimatedAbundance	Support, Co	PredictedSupport, Ce	Ratio, R
7000000498.a:SRS017521_Baylor_scaffold_5189	27555.2	0.980509	1	0.9805
7000000695.a:SRS049900_LANL_scaffold_14438	24985	1	1	1
7000000040.a:SRS043411_WUGC_scaffold_39395	21115.9	0.847493	1	0.8475
7000000171.a:SRS052697_LANL_scaffold_25054	17443.1	0.99999	1	1
7000000334.a:SRS015217_WUGC_scaffold_5454	15920.6	1	1	1
7000000735.a:SRS015190_WUGC_scaffold_21136	14896.3	0.846811	1	0.8468
3300003155.a:Ga0052270_10307189	14584	0.9312	1	0.9312
7000000093.a:SRS022137_LANL_scaffold_29955	13825	1	1	1
7000000690.a:SRS055982_Baylor_scaffold_15154	12106.6	0.925842	1	0.9258
7000000032.a:SRS024132_Baylor_scaffold_33940	11698.9	0.908437	1	0.9084
7000000300.a:SRS043701_LANL_scaffold_4863	9959.96	1	1	1
7000000317.a:SRS014459_WUGC_scaffold_11311	9550.77	0.885843	1	0.8858
7000000040.a:SRS043411_WUGC_scaffold_48710	8604	0.971488	1	0.9715
7000000271.a:SRS053335_LANL_scaffold_24771	8469.54	0.770955	1	0.771
7000000333.a:SRS050925_LANL_scaffold_16337	7936.53	0.999869	1	0.9999
7000000712.a:SRS057478_LANL_scaffold_16118	7201.86	0.885636	1	0.8856
7000000628.a:SRS015782_WUGC_scaffold_14071	6323.65	0.934234	1	0.9342
7000000111.a:SRS019601_WUGC_scaffold_4587	6235.1	0.998702	1	0.9987
7000000171.a:SRS052697_LANL_scaffold_35380	5877.4	0.986441	1	0.9864
7000000297.a:SRS056259_LANL_scaffold_56134	5293.32	0.953648	1	0.9536
7000000444.a:SRS063985_LANL_scaffold_25380	5192.35	0.998852	1	0.9989
7000000486.a:SRS015264_WUGC_scaffold_9389	5082.93	0.528126	0.999998	0.5281
7000000516.a:SRS019161_WUGC_scaffold_7477	4977.57	0.404886	1	0.4049
7000000460.a:SRS051031_LANL_scaffold_50865	4902.38	0.999404	1	0.9994
7000000646.a:SRS015960_WUGC_scaffold_30800	4767.62	0.889458	1	0.8895
7000000433.a:SRS050752_LANL_scaffold_17276	4396.28	1	1	1
3300003140.a:Ga0051081_1002036	4346.09	0.852478	1	0.8525
7000000171.a:SRS052697_LANL_scaffold_12111	4223.4	0.728291	0.999973	0.7283
7000000417.a:SRS011239_Baylor_scaffold_19446	4129.54	0.955223	1	0.9552
7000000538.a:SRS024075_LANL_scaffold_26	4104.87	0.330816	1	0.3308
7000000191.a:C3074825	4020.57	0.563018	1	0.563
7000000628.a:SRS015782_WUGC_scaffold_27732	3947	0.481363	1	0.4814
7000000532.a:SRS011529_WUGC_scaffold_23832	3926.13	0.778807	1	0.7788
7000000546.a:SRS019910_WUGC_scaffold_48843	3924.87	0.927739	1	0.9277
7000000142.a:SRS016753_Baylor_scaffold_16040	3914.94	1	1	1
7000000486.a:SRS015264_WUGC_scaffold_7670	3747.5	0.895768	1	0.8958
7000000334.a:SRS015217_WUGC_scaffold_31525	3734.05	0.984804	1	0.9848
7000000334.a:SRS015217_WUGC_scaffold_4400	3732.77	0.956372	1	0.9564
7000000492.a:SRS048164_WUGC_scaffold_3268	3724.48	0.999938	1	0.9999
7000000434.a:SRS014287_WUGC_scaffold_21386	3558.16	0.83064	1	0.8306
7000000296.a:SRS024009_Baylor_scaffold_5167	3422.13	0.995514	1	0.9955
7000000669.a:SRS022713_LANL_scaffold_10683	3358.88	0.888153	1	0.8882
7000000646.a:SRS015960_WUGC_scaffold_32038	3304.99	0.942035	1	0.942
7000000094.a:SRS024549_LANL_scaffold_5988	3198.12	0.988096	1	0.9881
7000000093.a:SRS022137_LANL_scaffold_16775	3145.57	0.790915	1	0.7909
7000000418.a:SRS012273_Baylor_scaffold_24943	3082.52	0.999733	1	0.9997
7000000178.a:SRS017247_LANL_scaffold_3057	3055.06	0.996264	1	0.9963
7000000401.a:SRS011271_WUGC_scaffold_24007	3036.23	0.525599	1	0.5256
7000000429.a:C2070877	2997	0.998996	1	0.999
7000000300.a:SRS043701_LANL_scaffold_31287	2980.18	0.990668	1	0.9907
7000000040.a:SRS043411_WUGC_scaffold_7890	2867.63	0.427542	1	0.4275
7000000192.a:SRS017821_Baylor_scaffold_7870	2819.7	0.999536	1	0.9995
7000000633.a:SRS015065_WUGC_scaffold_40156	2796.02	0.623341	1	0.6233
7000000231.a:SRS014613_WUGC_scaffold_5491	2787.29	0.976792	1	0.9768
7000000158.a:SRS014979_WUGC_scaffold_615	2762.94	0.683294	1	0.6833
3300003146.a:Ga0051080_1002265	2715.48	0.999286	1	0.9993
7000000434.a:SRS014287_WUGC_scaffold_4213	2715	0.988343	1	0.9883
7000000633.a:SRS015065_WUGC_scaffold_8037	2598.47	0.998733	1	0.9987
7000000011.a:SRS053214_LANL_scaffold_7045	2586.55	0.773565	1	0.7736
7000000464.a:SRS077730_LANL_scaffold_11133	2541.4	0.871682	1	0.8717
7000000740.a:SRS064276_LANL_scaffold_34440	2495.24	1	1	1
7000000646.a:SRS015960_WUGC_scaffold_11785	2475.26	1	1	1
7000000332.a:SRS015133_WUGC_scaffold_10007	2472.75	0.774386	1	0.7744
7000000417.a:SRS011239_Baylor_scaffold_29904	2462.82	0.954641	1	0.9546
7000000036.a:SRS049164_WUGC_scaffold_46965	2449.87	0.944395	1	0.9444
7000000232.a:SRS015578_WUGC_scaffold_17494	2435.57	0.99793	1	0.9979
7000000459.a:SRS012902_Baylor_scaffold_2704	2413	0.765098	1	0.7651
7000000069.a:SRS016095_WUGC_scaffold_4524	2410.62	0.413909	1	0.4139
7000000434.a:SRS014287_WUGC_scaffold_4299	2365.79	0.735641	1	0.7356
7000000258.a:SRS016335_WUGC_scaffold_29882	2305.98	0.87398	1	0.874
7000000516.a:SRS019161_WUGC_scaffold_23113	2284.05	0.753582	1	0.7536
7000000425.a:SRS013476_Baylor_scaffold_8090	2257.44	1	1	1
7000000181.a:SRS018656_WUGC_scaffold_1360	2254.21	0.995654	1	0.9957
3300003146.a:Ga0051080_1013286	2252.34	0.417717	0.999772	0.4178
7000000587.a:SRS023971_Baylor_scaffold_2586	2236.4	0.717119	1	0.7171
7000000417.a:SRS011239_Baylor_scaffold_29301	2226	0.33221	1	0.3322
7000000158.a:SRS014979_WUGC_scaffold_7591	2221.82	0.576662	1	0.5767
7000000193.a:SRS048870_WUGC_scaffold_15361	2165.95	0.36238	0.999797	0.3625
3300003146.a:Ga0051080_1007824	2147.36	0.660338	1	0.6603
7000000740.a:SRS064276_LANL_scaffold_20879	2131	0.652256	1	0.6523
7000000172.a:SRS020869_Baylor_scaffold_2143	2095.99	0.999315	1	0.9993
7000000011.a:SRS053214_LANL_scaffold_15526	2079.77	0.885049	1	0.885
7000000192.a:SRS017821_Baylor_scaffold_15325	2065.5	1	1	1
7000000498.a:SRS017521_Baylor_scaffold_40051	2051.94	0.990462	1	0.9905
7000000045.a:SRS013687_Baylor_scaffold_39059	2041.99	1	1	1
7000000272.a:C1593863	2039	0.831397	1	0.8314
7000000193.a:SRS048870_WUGC_scaffold_22340	2024.74	0.862576	1	0.8626
7000000077.a:SRS064645_LANL_scaffold_4766	2021.43	0.977712	0.999974	0.9777
7000000289.a:SRS024331_LANL_scaffold_16269	2005.56	0.997501	1	0.9975
7000000715.a:SRS014683_WUGC_scaffold_38313	1999	0.683842	0.999856	0.6839
7000000516.a:SRS019161_WUGC_scaffold_9943	1942.74	0.999895	1	0.9999
7000000045.a:SRS013687_Baylor_scaffold_5025	1941	0.923814	1	0.9238
7000000172.a:SRS020869_Baylor_scaffold_9018	1908.77	0.904584	1	0.9046
7000000171.a:SRS052697_LANL_scaffold_44596	1904.92	0.741316	0.999956	0.7413
3300003140.a:Ga0051081_1000343	1889.04	1	1	1
7000000112.a:SRS011302_Baylor_scaffold_8338	1858.78	0.999611	1	0.9996
7000000171.a:SRS052697_LANL_scaffold_15567	1857	0.928464	1	0.9285
7000000077.a:SRS064645_LANL_scaffold_1559	1824.99	0.957931	1	0.9579
7000000297.a:SRS056259_LANL_scaffold_26902	1804.25	0.888901	1	0.8889
7000000145.a:SRS050422_LANL_scaffold_38810	1776.78	0.998231	1	0.9982
7000000609.a:SRS056519_LANL_scaffold_32781	1753.64	0.99956	1	0.9996
7000000335.a:SRS015369_Baylor_scaffold_3634	1746.67	0.682664	1	0.6827
7000000740.a:SRS064276_LANL_scaffold_33847	1734.76	0.999903	1	0.9999
7000000417.a:SRS011239_Baylor_scaffold_25490	1722.01	0.901756	1	0.9018
7000000188.a:SRS053398_LANL_scaffold_24779	1703.8	0.817864	1	0.8179
7000000460.a:SRS051031_LANL_scaffold_38577	1689.69	0.998193	1	0.9982
7000000736.a:SRS014235_WUGC_scaffold_49626	1663.89	0.942373	0.999999	0.9424
7000000516.a:SRS019161_WUGC_scaffold_16553	1651.56	0.931114	1	0.9311
7000000093.a:SRS022137_LANL_scaffold_7313	1632.05	0.341461	0.999999	0.3415
7000000352.a:SRS014923_WUGC_scaffold_28200	1628.99	0.794253	0.99999	0.7943
7000000624.a:SRS024435_LANL_scaffold_33266	1601.38	0.741959	1	0.742
3300003146.a:Ga0051080_1011628	1601.36	0.707062	0.999681	0.7073
7000000232.a:SRS015578_WUGC_scaffold_47121	1595.21	0.690325	1	0.6903
7000000171.a:SRS052697_LANL_scaffold_31029	1548.83	0.531416	0.999934	0.5315
7000000418.a:SRS012273_Baylor_scaffold_35970	1540	0.319084	0.999868	0.3191
7000000498.a:SRS017521_Baylor_scaffold_15938	1536.4	0.440523	0.999221	0.4409
7000000239.a:SRS013951_WUGC_scaffold_6620	1522	0.864854	1	0.8649
7000000460.a:SRS051031_LANL_scaffold_33620	1516.53	0.993141	1	0.9931
7000000460.a:SRS051031_LANL_scaffold_14138	1508.43	0.732921	0.999972	0.7329
7000000464.a:SRS077730_LANL_scaffold_1401	1489.88	0.749647	1	0.7496
7000000077.a:SRS064645_LANL_scaffold_295	1485.99	0.845532	1	0.8455
7000000460.a:SRS051031_LANL_scaffold_43781	1462.32	0.666146	0.999937	0.6662
7000000515.a:SRS049995_LANL_scaffold_17190	1462.12	0.961518	1	0.9615
7000000142.a:SRS016753_Baylor_scaffold_14712	1411.98	0.999649	1	0.9996
7000000492.a:SRS048164_WUGC_scaffold_24100	1405.3	0.995146	1	0.9951
7000000045.a:SRS013687_Baylor_scaffold_49789	1389.01	0.999296	0.999998	0.9993
7000000373.a:SRS016989_Baylor_scaffold_17381	1388.99	1	1	1
7000000308.a:SRS058770_LANL_scaffold_2124	1379	0.406185	1	0.4062
7000000077.a:SRS064645_LANL_scaffold_3244	1368.47	0.845826	1	0.8458
7000000370.a:SRS017191_Baylor_scaffold_18441	1350.35	0.954455	1	0.9545
7000000232.a:SRS015578_WUGC_scaffold_50160	1334.1	0.486329	1	0.4863
7000000075.a:SRS016056_WUGC_scaffold_510	1322.6	0.412913	0.999926	0.4129
7000000317.a:SRS014459_WUGC_scaffold_31762	1297	0.900975	0.995385	0.9052
7000000740.a:SRS064276_LANL_scaffold_69549	1295.56	0.320195	0.971206	0.3297
7000000532.a:SRS011529_WUGC_scaffold_16757	1292.86	0.979377	1	0.9794
7000000492.a:SRS048164_WUGC_scaffold_15247	1289.32	0.830746	1	0.8307
7000000186.a:SRS022524_Baylor_scaffold_22974	1259.88	0.91875	1	0.9188
7000000348.a:SRS017701_Baylor_scaffold_1906	1245.16	1	1	1
7000000740.a:SRS064276_LANL_scaffold_6297	1244.27	0.999859	1	0.9999
7000000546.a:SRS019910_WUGC_scaffold_2839	1241.56	0.412524	0.998888	0.413
7000000112.a:SRS011302_Baylor_scaffold_24512	1225	0.511264	1	0.5113
7000000107.a:SRS042628_WUGC_scaffold_19969	1205.07	1	1	1
7000000300.a:SRS043701_LANL_scaffold_26644	1194.06	0.981236	1	0.9812
7000000538.a:SRS024075_LANL_scaffold_17794	1171.03	0.99953	1	0.9995
7000000186.a:SRS022524_Baylor_scaffold_18091	1155.78	0.578069	0.999981	0.5781
7000000715.a:SRS014683_WUGC_scaffold_10823	1155.52	0.593877	1	0.5939
7000000077.a:SRS064645_LANL_scaffold_5740	1153.46	0.834409	1	0.8344
3300003146.a:Ga0051080_1013285	1147.12	0.459506	0.999754	0.4596
7000000587.a:SRS023971_Baylor_scaffold_4655	1145.84	0.60614	1	0.6061
7000000040.a:SRS043411_WUGC_scaffold_38934	1142.5	0.337912	1	0.3379
7000000334.a:SRS015217_WUGC_scaffold_34308	1136.85	0.999959	1	1
7000000735.a:SRS015190_WUGC_scaffold_29555	1122.56	0.447276	0.999988	0.4473
7000000538.a:SRS024075_LANL_scaffold_11531	1114.2	0.987611	1	0.9876
7000000071.a:SRS065504_LANL_scaffold_42854	1110.01	0.99737	1	0.9974
7000000188.a:SRS053398_LANL_scaffold_19918	1106.36	0.884745	1	0.8847
7000000045.a:SRS013687_Baylor_scaffold_35231	1093.34	0.996099	1	0.9961
7000000333.a:SRS050925_LANL_scaffold_51739	1084.06	0.538375	0.999987	0.5384
7000000111.a:SRS019601_WUGC_scaffold_45411	1081	1	1	1
7000000289.a:SRS024331_LANL_scaffold_47838	1073.83	0.477439	0.999956	0.4775
7000000624.a:SRS024435_LANL_scaffold_32816	1052.46	0.98709	1	0.9871
7000000633.a:SRS015065_WUGC_scaffold_4951	1042.08	0.997657	1	0.9977
7000000069.a:SRS016095_WUGC_scaffold_7161	1041.94	0.999915	1	0.9999
7000000262.a:SRS047044_WUGC_scaffold_28336	1035.74	0.999825	1	0.9998
7000000735.a:SRS015190_WUGC_scaffold_19745	1027.24	0.921644	1	0.9216
7000000609.a:SRS056519_LANL_scaffold_24833	1026.94	0.817424	1	0.8174
7000000498.a:SRS017521_Baylor_scaffold_21475	1013.24	0.979725	1	0.9797
7000000441.a:SRS015794_Baylor_scaffold_14677	1006.88	0.278118	0.918336	0.3029
7000000032.a:SRS024132_Baylor_scaffold_21369	1004	0.317554	0.998527	0.318
7000000475.a:SRS020328_Baylor_scaffold_37397	1003.18	0.999761	1	0.9998
7000000385.a:SRS017433_Baylor_scaffold_16143	999.921	0.769826	1	0.7698
7000000521.a:SRS023583_Baylor_scaffold_7990	992.655	0.345961	0.999524	0.3461
7000000661.a:SRS052027_LANL_scaffold_16529	987.99	0.806027	0.994662	0.8104
7000000630.a:SRS062427_LANL_scaffold_3363	987.369	0.769611	0.999747	0.7698
7000000271.a:SRS053335_LANL_scaffold_31241	979.375	0.418906	1	0.4189
7000000193.a:SRS048870_WUGC_scaffold_11970	971.793	0.999739	1	0.9997
7000000633.a:SRS015065_WUGC_scaffold_31776	965.73	0.845199	0.99932	0.8458
7000000736.a:SRS014235_WUGC_scaffold_59350	958.097	0.352149	0.965276	0.3648
7000000516.a:C2642171	955	1	1	1
7000000492.a:SRS048164_WUGC_scaffold_32442	954.151	0.79394	1	0.7939
7000000433.a:SRS050752_LANL_scaffold_13058	950.319	0.939189	0.999999	0.9392
7000000093.a:SRS022137_LANL_scaffold_5967	948.772	0.995767	1	0.9958
7000000011.a:SRS053214_LANL_scaffold_8387	947.719	0.32879	0.999972	0.3288
7000000490.a:SRS013800_Baylor_scaffold_14545	947.2	1	1	1
7000000332.a:SRS015133_WUGC_scaffold_39195	946.467	0.551458	1	0.5515
7000000630.a:SRS062427_LANL_scaffold_16053	939	0.309733	1	0.3097
7000000081.a:SRS017307_Baylor_scaffold_8553	939	0.409993	0.995621	0.4118
7000000646.a:SRS015960_WUGC_scaffold_3189	937.539	0.984684	1	0.9847
3300003146.a:Ga0051080_1003158	935.375	0.519801	1	0.5198
7000000158.a:SRS014979_WUGC_scaffold_10649	931.71	0.999624	1	0.9996
7000000296.a:SRS024009_Baylor_scaffold_72	931.024	0.931998	0.999693	0.9323
7000000403.a:SRS024388_LANL_scaffold_84	926.561	0.999963	1	1
7000000232.a:SRS015578_WUGC_scaffold_37647	925.188	0.8883	0.998884	0.8893
7000000142.a:SRS016753_Baylor_scaffold_14436	919.922	0.999309	1	0.9993
7000000352.a:SRS014923_WUGC_scaffold_21234	918.8	0.931358	1	0.9314
7000000712.a:SRS057478_LANL_scaffold_23604	917.711	0.432119	0.995509	0.4341
7000000186.a:SRS022524_Baylor_scaffold_44229	917.01	0.998003	1	0.998
7000000317.a:SRS014459_WUGC_scaffold_24841	902.061	0.939647	1	0.9396
7000000289.a:SRS024331_LANL_scaffold_48631	900.082	0.73093	1	0.7309
7000000122.a:C1755092	884.657	0.98567	1	0.9857
7000000549.a:SRS013521_LANL_scaffold_12643	882.121	0.881965	1	0.882
7000000112.a:SRS011302_Baylor_scaffold_21779	880.81	0.645425	1	0.6454
7000000531.a:SRS049959_WUGC_scaffold_8601	871	0.549234	0.999996	0.5492
7000000570.a:SRS051882_Baylor_scaffold_15608	857.619	0.999828	1	0.9998
7000000297.a:SRS056259_LANL_scaffold_53198	849.364	1	1	1
7000000111.a:SRS019601_WUGC_scaffold_34018	846.33	0.862648	1	0.8626
7000000317.a:SRS014459_WUGC_scaffold_30712	845.056	0.607958	0.995243	0.6109
3300003146.a:Ga0051080_1006856	840.952	0.889262	0.999977	0.8893
7000000641.a:SRS018351_Baylor_scaffold_21250	838.509	0.603423	1	0.6034
7000000262.a:SRS047044_WUGC_scaffold_30230	837.537	0.859269	1	0.8593
7000000460.a:SRS051031_LANL_scaffold_4812	831.995	0.997815	1	0.9978
7000000158.a:SRS014979_WUGC_scaffold_14669	828	0.936389	0.99999	0.9364
7000000410.a:SRS019030_Baylor_scaffold_32715	827	0.413787	0.999844	0.4139
7000000684.a:SRS019582_WUGC_scaffold_51542	825.195	0.645489	0.999988	0.6455
7000000302.a:SRS023914_Baylor_scaffold_13777	820.228	0.546743	0.993439	0.5504
7000000040.a:SRS043411_WUGC_scaffold_21308	820.202	0.425035	0.977437	0.4348
7000000370.a:SRS017191_Baylor_scaffold_23359	820.028	0.952875	1	0.9529
7000000628.a:SRS015782_WUGC_scaffold_3641	820	0.949038	1	0.949
7000000429.a:C2070823	814.759	0.721666	1	0.7217
7000000232.a:SRS015578_WUGC_scaffold_51358	812	0.945852	0.999998	0.9459
7000000332.a:SRS015133_WUGC_scaffold_29132	803.45	0.833286	1	0.8333
7000000628.a:C3502443	802.42	0.917601	1	0.9176
7000000434.a:SRS014287_WUGC_scaffold_11775	797.499	0.705474	0.999334	0.7059
7000000300.a:SRS043701_LANL_scaffold_6919	795.379	1	1	1
7000000320.a:SRS063040_Baylor_scaffold_39114	790	0.329359	0.994516	0.3312
7000000045.a:SRS013687_Baylor_scaffold_49129	789.532	0.897783	1	0.8978
7000000231.a:SRS014613_WUGC_scaffold_29584	781.95	0.89044	0.999983	0.8905
7000000526.a:SRS019397_WUGC_scaffold_28077	778.2	0.626444	0.95989	0.6526
7000000006.a:SRS054956_LANL_scaffold_45036	777.495	0.646946	0.999808	0.6471
7000000011.a:SRS053214_LANL_scaffold_10149	768.749	0.600566	0.999208	0.601
7000000077.a:SRS064645_LANL_scaffold_2386	767.767	0.327932	0.999351	0.3281
7000000094.a:SRS024549_LANL_scaffold_11251	767.481	0.753863	1	0.7539
7000000320.a:SRS063040_Baylor_scaffold_54287	765.668	0.999473	1	0.9995
7000000192.a:C2499098	761.26	1	1	1
7000000633.a:SRS015065_WUGC_scaffold_13433	758.98	0.879248	1	0.8792
7000000740.a:SRS064276_LANL_scaffold_5388	754.15	0.467717	0.987999	0.4734
7000000098.a:SRS023176_Baylor_scaffold_4581	749.719	0.449809	0.998739	0.4504
7000000370.a:SRS017191_Baylor_scaffold_25985	749.276	0.987461	1	0.9875
7000000172.a:SRS020869_Baylor_scaffold_8026	746.23	0.997674	1	0.9977
7000000509.a:SRS054590_LANL_scaffold_9148	745.737	0.823977	0.999998	0.824
7000000695.a:SRS049900_LANL_scaffold_302	730	0.797737	0.962258	0.829
7000000433.a:SRS050752_LANL_scaffold_36687	720.03	0.866478	0.999999	0.8665
7000000460.a:SRS051031_LANL_scaffold_41318	719.002	0.725487	0.999989	0.7255
7000000193.a:SRS048870_WUGC_scaffold_23736	718.262	0.920199	1	0.9202
7000000045.a:SRS013687_Baylor_scaffold_20818	715.642	0.996875	1	0.9969
7000000695.a:SRS049900_LANL_scaffold_18790	714.909	0.908847	1	0.9088
7000000538.a:SRS024075_LANL_scaffold_11346	713.078	0.997397	1	0.9974
7000000736.a:SRS014235_WUGC_scaffold_18964	711.766	0.480839	1	0.4808
7000000186.a:SRS022524_Baylor_scaffold_4999	711.324	0.707743	0.999999	0.7077
7000000252.a:C2209446	711.251	0.998529	0.999847	0.9987
7000000112.a:C3417653	711.109	0.997353	1	0.9974
3300003140.a:Ga0051081_1009322	705	0.980016	0.998981	0.981
7000000433.a:SRS050752_LANL_scaffold_4992	694.989	0.545368	0.904256	0.6031
7000000011.a:SRS053214_LANL_scaffold_1564	694	0.428223	0.999997	0.4282
7000000531.a:SRS049959_WUGC_scaffold_30759	692.578	0.718721	0.994291	0.7228
7000000317.a:SRS014459_WUGC_scaffold_19157	692.061	0.997201	1	0.9972
7000000107.a:SRS042628_WUGC_scaffold_3180	692	0.99354	1	0.9935
7000000417.a:SRS011239_Baylor_scaffold_5769	683.938	0.976435	1	0.9764
7000000032.a:SRS024132_Baylor_scaffold_8274	681.164	0.522958	1	0.523
7000000112.a:SRS011302_Baylor_scaffold_18536	672.128	0.926709	1	0.9267
7000000308.a:SRS058770_LANL_scaffold_38398	669.311	0.340367	0.999987	0.3404
7000000538.a:SRS024075_LANL_scaffold_17053	666	0.958065	0.999776	0.9583
7000000380.a:SRS015663_WUGC_scaffold_187	665.039	0.998639	1	0.9986
7000000626.a:SRS064557_LANL_scaffold_5967	664.188	0.996628	1	0.9966
7000000352.a:SRS014923_WUGC_scaffold_8559	663.491	0.57251	0.998077	0.5736
7000000628.a:SRS015782_WUGC_scaffold_1599	662.978	0.487711	1	0.4877
7000000498.a:SRS017521_Baylor_scaffold_3364	658.173	0.807364	0.956423	0.8442
7000000633.a:SRS015065_WUGC_scaffold_20166	657.747	0.999236	1	0.9992
7000000380.a:SRS015663_WUGC_scaffold_33235	656.883	0.858254	0.9995	0.8587
7000000297.a:SRS056259_LANL_scaffold_23533	656.228	0.9999	1	0.9999
7000000200.a:SRS023526_Baylor_scaffold_6468	654.38	0.419301	0.999823	0.4194
7000000083.a:C15593027	654.006	0.855354	1	0.8554
7000000320.a:SRS063040_Baylor_scaffold_57179	646.192	0.996132	1	0.9961
3300003146.a:Ga0051080_1010211	643.699	0.734178	0.995257	0.7377
7000000171.a:SRS052697_LANL_scaffold_17663	640.792	0.387586	0.999999	0.3876
7000000265.a:C2881575	635.204	0.658531	1	0.6585
7000000370.a:SRS017191_Baylor_scaffold_21968	634.882	0.947234	0.999998	0.9472
7000000171.a:SRS052697_LANL_scaffold_62758	633.523	0.318764	0.999521	0.3189
7000000334.a:SRS015217_WUGC_scaffold_5606	632.903	0.306255	0.964743	0.3174
7000000444.a:SRS063985_LANL_scaffold_14384	632.788	0.856417	1	0.8564
7000000481.a:SRS047014_WUGC_scaffold_65733	628.018	0.948519	1	0.9485
7000000045.a:SRS013687_Baylor_scaffold_19069	625.01	0.410433	0.987234	0.4157
7000000011.a:SRS053214_LANL_scaffold_25652	620.772	0.519631	0.998076	0.5206
7000000627.a:SRS014313_WUGC_scaffold_508	619.323	1	1	1
7000000069.a:SRS016095_WUGC_scaffold_19329	615.456	0.999332	1	0.9993
7000000370.a:SRS017191_Baylor_scaffold_21193	615.429	0.987968	1	0.988
7000000171.a:SRS052697_LANL_scaffold_53090	614.473	0.573404	0.998703	0.5741
7000000740.a:SRS064276_LANL_scaffold_8498	610.635	0.378477	0.99706	0.3796
7000000112.a:C3418093	610.421	0.529385	0.999827	0.5295
7000000308.a:SRS058770_LANL_scaffold_32137	609.422	0.876433	0.999351	0.877
7000000492.a:SRS048164_WUGC_scaffold_6049	609.158	0.663995	0.991649	0.6696
7000000464.a:SRS077730_LANL_scaffold_3549	608.118	0.785108	0.977383	0.8033
7000000444.a:SRS063985_LANL_scaffold_45200	605.617	0.410276	0.960702	0.4271
7000000071.a:SRS065504_LANL_scaffold_28056	594	0.491141	0.945695	0.5193
7000000486.a:SRS015264_WUGC_scaffold_57621	592.661	0.824018	1	0.824
7000000308.a:SRS058770_LANL_scaffold_6219	590.101	0.516208	0.989472	0.5217
7000000045.a:SRS013687_Baylor_scaffold_5170	590.037	0.701194	0.999634	0.7015
7000000373.a:SRS016989_Baylor_scaffold_12709	589.609	0.966765	1	0.9668
7000000633.a:SRS015065_WUGC_scaffold_42692	588.969	0.318792	0.878419	0.3629
7000000626.a:C1917078	585.91	0.950155	1	0.9502
7000000111.a:SRS019601_WUGC_scaffold_14661	585.497	0.990081	1	0.9901
7000000289.a:SRS024331_LANL_scaffold_41417	580.772	0.589097	0.981241	0.6004
7000000624.a:SRS024435_LANL_scaffold_33663	578	0.975205	0.999998	0.9752
7000000715.a:SRS014683_WUGC_scaffold_38902	575.672	1	1	1
7000000296.a:C1830652	575	0.967394	0.998984	0.9684
7000000282.a:SRS019685_WUGC_scaffold_54525	571.79	0.665158	1	0.6652
7000000317.a:SRS014459_WUGC_scaffold_50280	571.095	0.316893	0.994534	0.3186
7000000429.a:C2072231	569	0.54344	0.996885	0.5451
7000000712.a:SRS057478_LANL_scaffold_27036	567.701	0.959865	1	0.9599
7000000609.a:SRS056519_LANL_scaffold_2340	566.573	0.849924	1	0.8499
7000000659.a:SRS015854_WUGC_scaffold_17917	565.368	0.997412	1	0.9974
7000000531.a:SRS049959_WUGC_scaffold_24355	565	1	1	1
7000000418.a:SRS012273_Baylor_scaffold_968	563.49	0.833685	0.996424	0.8367
7000000040.a:SRS043411_WUGC_scaffold_15815	562	1	1	1
7000000131.a:SRS057717_LANL_scaffold_11726	561.384	0.967034	1	0.967
7000000641.a:C2814179	561	0.851915	0.999999	0.8519
7000000684.a:SRS019582_WUGC_scaffold_22380	560.399	0.861538	1	0.8615
7000000475.a:SRS020328_Baylor_scaffold_3509	558.594	0.420352	0.996517	0.4218
7000000192.a:C2494522	558.008	0.998317	1	0.9983
7000000045.a:SRS013687_Baylor_scaffold_16426	555.333	0.5991	0.999998	0.5991
7000000186.a:SRS022524_Baylor_scaffold_63692	555.062	0.871586	1	0.8716
7000000006.a:SRS054956_LANL_scaffold_12498	551.728	0.96806	0.985805	0.982
7000000441.a:SRS015794_Baylor_scaffold_12587	549.71	1	1	1
7000000661.a:SRS052027_LANL_scaffold_25762	548.895	0.99935	1	0.9994
7000000192.a:C2499635	540.362	0.486853	0.999995	0.4869
7000000232.a:SRS015578_WUGC_scaffold_296	539.216	0.418561	0.980406	0.4269
7000000069.a:SRS016095_WUGC_scaffold_21527	534.694	0.629027	1	0.629
7000000526.a:SRS019397_WUGC_scaffold_19451	534.694	1	1	1
7000000370.a:SRS017191_Baylor_scaffold_3408	532.907	0.510825	1	0.5108
7000000231.a:SRS014613_WUGC_scaffold_15665	529.042	0.255684	0.770421	0.3319
7000000231.a:SRS014613_WUGC_scaffold_1630	521.727	0.313579	0.955335	0.3282
7000000308.a:SRS058770_LANL_scaffold_31095	520.43	0.845427	0.999046	0.8462
7000000627.a:SRS014313_WUGC_scaffold_5153	519.073	0.988305	1	0.9883
7000000516.a:SRS019161_WUGC_scaffold_30524	518.023	0.909116	0.999987	0.9091
7000000352.a:SRS014923_WUGC_scaffold_59198	516.391	0.993576	1	0.9936
7000000740.a:SRS064276_LANL_scaffold_53752	514.298	0.745252	0.951201	0.7835
3300003140.a:Ga0051081_1006770	511.311	0.679954	0.999995	0.68
7000000380.a:SRS015663_WUGC_scaffold_1668	511.078	0.967687	1	0.9677
7000000434.a:SRS014287_WUGC_scaffold_38549	509	0.979498	0.999999	0.9795
7000000715.a:SRS014683_WUGC_scaffold_51421	507.326	0.984001	0.999997	0.984
7000000521.a:SRS023583_Baylor_scaffold_11082	507	0.337377	1	0.3374
7000000516.a:SRS019161_WUGC_scaffold_66992	505.889	0.872485	0.999926	0.8725
7000000661.a:SRS052027_LANL_scaffold_18245	505.37	0.37058	0.948869	0.3905
7000000407.a:C3633842	504.874	0.832535	0.999997	0.8325
7000000609.a:SRS056519_LANL_scaffold_11960	504.314	0.98967	0.99948	0.9902
7000000069.a:SRS016095_WUGC_scaffold_38404	500.146	0.732708	1	0.7327
7000000515.a:SRS049995_LANL_scaffold_34848	499.877	0.73728	0.999938	0.7373
7000000684.a:SRS019582_WUGC_scaffold_25599	499	0.400905	0.915989	0.4377
7000000142.a:SRS016753_Baylor_scaffold_16074	498.942	1	1	1
7000000559.a:SRS058723_Baylor_scaffold_12543	497.936	0.669947	1	0.6699
7000000022.a:SRS011452_WUGC_scaffold_1815	495.873	0.979496	1	0.9795
7000000684.a:SRS019582_WUGC_scaffold_31765	490.089	0.786332	1	0.7863
7000000690.a:SRS055982_Baylor_scaffold_3508	489.306	0.426144	0.971242	0.4388
7000000444.a:SRS063985_LANL_scaffold_7386	487.299	0.404727	0.999739	0.4048
7000000098.a:SRS023176_Baylor_scaffold_13473	483.222	0.997416	1	0.9974
7000000300.a:SRS043701_LANL_scaffold_19429	483	0.389646	0.972474	0.4007
7000000633.a:SRS015065_WUGC_scaffold_38818	482.263	0.823119	0.999493	0.8235
7000000302.a:SRS023914_Baylor_scaffold_2355	477.072	0.99681	1	0.9968
7000000515.a:SRS049995_LANL_scaffold_21566	475.979	0.993874	0.995462	0.9984
7000000380.a:SRS015663_WUGC_scaffold_9299	475.854	0.741586	0.968536	0.7657
7000000633.a:C2488216	471.701	0.881365	0.998735	0.8825
7000000071.a:SRS065504_LANL_scaffold_22142	470.572	0.756156	0.992385	0.762
7000000515.a:SRS049995_LANL_scaffold_1391	469.638	0.6118	0.938127	0.6522
7000000232.a:SRS015578_WUGC_scaffold_13475	468.981	0.462122	0.973828	0.4745
7000000232.a:SRS015578_WUGC_scaffold_31076	467.157	0.455057	0.999891	0.4551
3300003146.a:Ga0051080_1011624	466.728	0.879425	0.999944	0.8795
7000000112.a:C3418131	466.169	0.998178	1	0.9982
7000000633.a:SRS015065_WUGC_scaffold_2847	465.857	0.665417	0.983259	0.6767
7000000317.a:SRS014459_WUGC_scaffold_73917	463.618	0.704441	0.998564	0.7055
7000000111.a:SRS019601_WUGC_scaffold_14923	456.614	0.963236	1	0.9632
7000000308.a:SRS058770_LANL_scaffold_26875	456.279	0.612797	0.991707	0.6179
7000000352.a:SRS014923_WUGC_scaffold_15552	455.122	0.999798	1	0.9998
7000000093.a:SRS022137_LANL_scaffold_648	449.437	0.875949	1	0.8759
7000000684.a:SRS019582_WUGC_scaffold_85806	448.111	0.997559	1	0.9976
7000000069.a:SRS016095_WUGC_scaffold_12996	447.939	0.664609	0.999987	0.6646
7000000373.a:SRS016989_Baylor_scaffold_5882	447.747	0.999074	1	0.9991
7000000646.a:SRS015960_WUGC_scaffold_14975	440.016	0.448199	0.992021	0.4518
7000000075.a:C1203267	439.167	0.819258	0.999998	0.8193
7000000632.a:SRS050299_LANL_scaffold_14531	433.889	0.999716	1	0.9997
7000000407.a:C3633634	433.11	0.809674	0.999999	0.8097
7000000193.a:SRS048870_WUGC_scaffold_19106	430.688	0.478205	0.989506	0.4833
7000000302.a:SRS023914_Baylor_scaffold_5263	429	0.82982	0.914201	0.9077
7000000308.a:SRS058770_LANL_scaffold_29582	428.311	0.37416	0.872128	0.429
3300003146.a:Ga0051080_1008079	427.671	0.831383	1	0.8314
7000000684.a:SRS019582_WUGC_scaffold_74917	426.795	0.544325	0.997287	0.5458
7000000300.a:SRS043701_LANL_scaffold_22119	423.345	0.570128	0.998818	0.5708
7000000071.a:SRS065504_LANL_scaffold_57925	423	0.438235	0.997188	0.4395
7000000441.a:SRS015794_Baylor_scaffold_20364	420.402	0.997324	0.999998	0.9973
7000000107.a:SRS042628_WUGC_scaffold_11024	419.886	0.574811	0.99235	0.5792
7000000582.a:SRS019787_WUGC_scaffold_25417	419.44	0.960169	1	0.9602
7000000289.a:SRS024331_LANL_scaffold_42203	418.227	0.991361	0.999933	0.9914
7000000464.a:SRS077730_LANL_scaffold_14893	417.986	0.894915	0.99402	0.9003
3300003146.a:Ga0051080_1019687	417	0.995084	0.99886	0.9962
7000000122.a:SRS042284_WUGC_scaffold_9524	409.326	0.670487	1	0.6705
7000000093.a:SRS022137_LANL_scaffold_26554	409.087	0.333892	0.990393	0.3371
7000000538.a:SRS024075_LANL_scaffold_18687	407.24	0.667817	0.999921	0.6679
7000000232.a:SRS015578_WUGC_scaffold_38693	406.652	0.519666	0.942205	0.5515
7000000532.a:SRS011529_WUGC_scaffold_31780	404.927	1	1	1
7000000546.a:SRS019910_WUGC_scaffold_71793	403.458	0.293799	0.964014	0.3048
7000000484.a:SRS016018_WUGC_scaffold_24300	402.299	0.94686	0.999991	0.9469
7000000252.a:C2208458	402	1	0.999998	1
7000000546.a:SRS019910_WUGC_scaffold_48242	401.163	0.561116	0.999952	0.5611
7000000736.a:SRS014235_WUGC_scaffold_4960	400.957	0.595393	0.980714	0.6071
3300003146.a:Ga0051080_1009974	397.595	0.932255	0.995073	0.9369
7000000231.a:SRS014613_WUGC_scaffold_21346	397.457	0.736325	0.999999	0.7363
7000000306.a:SRS043001_WUGC_scaffold_44707	397	0.997462	1	0.9975
7000000740.a:SRS064276_LANL_scaffold_8125	394.737	0.297033	0.965072	0.3078
7000000632.a:SRS050299_LANL_scaffold_14870	391.09	0.347387	0.999964	0.3474
7000000142.a:SRS016753_Baylor_scaffold_22	387	0.693882	0.999955	0.6939
7000000736.a:SRS014235_WUGC_scaffold_70343	386	1	0.999989	1
7000000444.a:SRS063985_LANL_scaffold_56162	383.112	0.701033	0.997591	0.7027
7000000317.a:SRS014459_WUGC_scaffold_95758	381.941	0.693469	0.965207	0.7185
7000000492.a:SRS048164_WUGC_scaffold_2302	381.238	0.570673	0.997203	0.5723
7000000122.a:SRS042284_WUGC_scaffold_8327	377.044	0.622857	1	0.6229
7000000397.a:SRS011586_WUGC_scaffold_30565	375.728	0.512668	0.999885	0.5127
7000000112.a:SRS011302_Baylor_scaffold_20697	374.416	0.705956	0.999192	0.7065
7000000690.a:SRS055982_Baylor_scaffold_1947	372.661	0.899498	1	0.8995
7000000441.a:SRS015794_Baylor_scaffold_1280	370.973	0.907583	0.99986	0.9077
7000000158.a:SRS014979_WUGC_scaffold_36459	370.882	0.523972	0.994262	0.527
7000000418.a:SRS012273_Baylor_scaffold_38856	369.656	0.999908	1	0.9999
7000000093.a:SRS022137_LANL_scaffold_3435	368.045	0.999735	1	0.9997
7000000317.a:C2700901	366.867	0.979895	0.999918	0.98
7000000516.a:SRS019161_WUGC_scaffold_10156	366.863	0.413827	0.987872	0.4189
7000000370.a:C1745436	365.444	0.995973	0.999999	0.996
7000000069.a:SRS016095_WUGC_scaffold_17282	364.802	0.972441	0.9832	0.9891
7000000646.a:C1934882	362.5	0.57332	0.999995	0.5733
7000000526.a:SRS019397_WUGC_scaffold_24247	360.99	0.99991	1	0.9999
7000000213.a:SRS011405_WUGC_scaffold_13873	360.636	0.84253	0.995727	0.8461
7000000218.a:C3076292	359.553	0.549385	0.987964	0.5561
7000000418.a:C3792130	359	1	1	1
7000000532.a:SRS011529_WUGC_scaffold_9616	358.14	0.570788	0.999951	0.5708
7000000740.a:SRS064276_LANL_scaffold_54249	358	0.900702	0.999981	0.9007
7000000626.a:SRS064557_LANL_scaffold_6895	357.045	0.372548	0.988154	0.377
7000000736.a:SRS014235_WUGC_scaffold_64998	356.484	0.262675	0.861502	0.3049
7000000333.a:SRS050925_LANL_scaffold_5503	352.936	0.322628	0.86055	0.3749
7000000736.a:SRS014235_WUGC_scaffold_72893	350.604	0.999027	0.998225	0.9992
7000000158.a:SRS014979_WUGC_scaffold_29059	350	1	0.999992	1
7000000077.a:C470392	347	1	0.999961	1
7000000628.a:SRS015782_WUGC_scaffold_4605	346.129	1	1	1
7000000334.a:SRS015217_WUGC_scaffold_14064	344.67	0.967522	0.999999	0.9675
7000000736.a:SRS014235_WUGC_scaffold_67145	344.289	0.703891	0.999521	0.7042
7000000186.a:SRS022524_Baylor_scaffold_872	344	0.996735	0.99712	0.9996
7000000296.a:SRS024009_Baylor_scaffold_2001	343.44	0.936925	0.999504	0.9374
7000000186.a:SRS022524_Baylor_scaffold_76131	342.771	0.463258	0.950911	0.4872
7000000740.a:SRS064276_LANL_scaffold_29043	342.247	0.938302	1	0.9383
7000000624.a:SRS024435_LANL_scaffold_1544	341.832	0.908386	0.99955	0.9088
7000000418.a:SRS012273_Baylor_scaffold_1039	338.968	0.448608	0.994106	0.4513
7000000515.a:SRS049995_LANL_scaffold_20086	338.285	0.987288	1	0.9873
7000000317.a:SRS014459_WUGC_scaffold_94515	337.64	0.672456	0.999835	0.6726
7000000289.a:SRS024331_LANL_scaffold_50290	336.698	0.992466	0.999975	0.9925
7000000609.a:SRS056519_LANL_scaffold_21462	335	0.452139	0.999576	0.4523
7000000348.a:C1920110	334	0.937889	1	0.9379
7000000332.a:SRS015133_WUGC_scaffold_30031	334	0.298215	0.983381	0.3033
7000000641.a:C2815737	334	0.990696	0.99917	0.9915
7000000417.a:SRS011239_Baylor_scaffold_29642	333.062	0.805242	0.999806	0.8054
7000000239.a:SRS013951_WUGC_scaffold_8022	332.875	0.263504	0.865311	0.3045
7000000081.a:SRS017307_Baylor_scaffold_7371	331.778	0.414257	0.915549	0.4525
7000000669.a:SRS022713_LANL_scaffold_2817	331.412	0.455781	0.986572	0.462
7000000370.a:SRS017191_Baylor_scaffold_22854	330.768	0.799335	0.999989	0.7993
7000000484.a:SRS016018_WUGC_scaffold_18934	329.004	0.281887	0.931394	0.3027
7000000320.a:SRS063040_Baylor_scaffold_59302	329	0.346201	0.998766	0.3466
7000000181.a:SRS018656_WUGC_scaffold_14050	328.953	0.619696	0.996589	0.6218
7000000098.a:SRS023176_Baylor_scaffold_1220	328.664	0.989677	1	0.9897
7000000045.a:SRS013687_Baylor_scaffold_59596	327.185	0.997569	0.999995	0.9976
7000000460.a:SRS051031_LANL_scaffold_8635	325.498	0.538225	0.999437	0.5385
7000000401.a:SRS011271_WUGC_scaffold_27850	324.77	0.440986	0.995282	0.4431
7000000308.a:SRS058770_LANL_scaffold_18662	324.106	0.530521	0.965119	0.5497
7000000736.a:SRS014235_WUGC_scaffold_11916	321.791	0.566027	0.999773	0.5662
7000000032.a:SRS024132_Baylor_scaffold_30054	321.471	0.790665	1	0.7907
7000000333.a:SRS050925_LANL_scaffold_40147	320.635	0.294367	0.730129	0.4032
7000000433.a:SRS050752_LANL_scaffold_33736	320.313	0.691183	0.996281	0.6938
7000000317.a:SRS014459_WUGC_scaffold_63797	320.119	0.318604	0.962017	0.3312
7000000333.a:SRS050925_LANL_scaffold_43871	318.446	0.717745	0.864859	0.8299
7000000418.a:SRS012273_Baylor_scaffold_1923	317.339	0.543109	0.999995	0.5431
7000000646.a:SRS015960_WUGC_scaffold_16943	316	0.535509	0.994493	0.5385
7000000492.a:SRS048164_WUGC_scaffold_14045	314.787	0.595649	0.953205	0.6249
7000000515.a:SRS049995_LANL_scaffold_71	314.448	0.900746	0.986658	0.9129
7000000171.a:SRS052697_LANL_scaffold_14420	311.777	0.604279	0.82014	0.7368
7000000011.a:SRS053214_LANL_scaffold_17308	310.127	0.997863	1	0.9979
7000000193.a:SRS048870_WUGC_scaffold_4639	310.117	1	1	1
7000000498.a:SRS017521_Baylor_scaffold_30298	310.081	0.931223	0.977437	0.9527
7000000684.a:SRS019582_WUGC_scaffold_45172	308.608	0.341218	0.886483	0.3849
7000000232.a:SRS015578_WUGC_scaffold_8983	308.359	0.665177	1	0.6652
7000000735.a:SRS015190_WUGC_scaffold_19561	308	0.395452	0.998072	0.3962
7000000192.a:SRS017821_Baylor_scaffold_23929	305.606	0.994368	0.999997	0.9944
7000000740.a:SRS064276_LANL_scaffold_56045	305.24	0.529193	0.97285	0.544
7000000081.a:SRS017307_Baylor_scaffold_25643	304.966	0.41198	0.975281	0.4224
7000000492.a:SRS048164_WUGC_scaffold_37566	304.265	0.770093	0.999912	0.7702
7000000609.a:SRS056519_LANL_scaffold_7746	303.922	0.67068	0.999649	0.6709
7000000659.a:SRS015854_WUGC_scaffold_35610	302.744	0.999901	1	0.9999
7000000626.a:SRS064557_LANL_scaffold_4030	302.49	0.998289	1	0.9983
7000000579.a:SRS017103_Baylor_scaffold_10142	297.178	1	1	1
7000000145.a:SRS050422_LANL_scaffold_89071	295.409	0.582499	0.999892	0.5826
7000000372.a:SRS045713_WUGC_scaffold_43563	294.984	0.370567	0.979131	0.3785
7000000186.a:SRS022524_Baylor_scaffold_36388	294	0.982178	0.997423	0.9847
7000000546.a:SRS019910_WUGC_scaffold_60090	293.867	0.369196	0.871625	0.4236
7000000410.a:SRS019030_Baylor_scaffold_2097	293.836	0.589167	1	0.5892
7000000112.a:SRS011302_Baylor_scaffold_10368	292.069	0.656816	0.994113	0.6607
7000000661.a:SRS052027_LANL_scaffold_24881	292	0.700321	0.866754	0.808
7000000740.a:SRS064276_LANL_scaffold_29709	291.878	0.306639	0.973316	0.315
7000000401.a:C3194327	291	0.995961	0.999112	0.9968
7000000262.a:SRS047044_WUGC_scaffold_26682	290.072	1	1	1
7000000145.a:SRS050422_LANL_scaffold_56839	289.496	0.476164	0.883417	0.539
7000000172.a:SRS020869_Baylor_scaffold_19970	289.455	0.999435	1	0.9994
7000000111.a:SRS019601_WUGC_scaffold_27782	288.515	0.829979	0.999989	0.83
7000000011.a:SRS053214_LANL_scaffold_26224	287.787	0.998838	1	0.9988
7000000630.a:SRS062427_LANL_scaffold_11523	286.599	0.796755	1	0.7968
7000000112.a:SRS011302_Baylor_scaffold_22046	284.965	0.929628	1	0.9296
7000000646.a:SRS015960_WUGC_scaffold_17729	284.82	0.43135	0.997955	0.4322
7000000022.a:SRS011452_WUGC_scaffold_8852	284.426	0.987819	1	0.9878
7000000071.a:SRS065504_LANL_scaffold_57756	282	0.337359	0.998525	0.3379
7000000509.a:SRS054590_LANL_scaffold_1726	281.824	0.400316	0.811982	0.493
7000000538.a:SRS024075_LANL_scaffold_4520	281.684	0.443757	0.927941	0.4782
7000000417.a:SRS011239_Baylor_scaffold_14910	281.047	0.784106	0.976837	0.8027
7000000684.a:SRS019582_WUGC_scaffold_37403	281	0.957279	0.998819	0.9584
7000000192.a:SRS017821_Baylor_scaffold_15726	280.788	0.950072	1	0.9501
7000000081.a:SRS017307_Baylor_scaffold_6106	279.261	0.980329	0.987296	0.9929
7000000308.a:SRS058770_LANL_scaffold_3050	279.169	0.822672	0.99063	0.8305
7000000460.a:SRS051031_LANL_scaffold_12877	277.832	0.874096	0.999605	0.8744
7000000481.a:SRS047014_WUGC_scaffold_30051	271.847	0.609502	0.999998	0.6095
7000000633.a:SRS015065_WUGC_scaffold_40472	271.003	0.711965	0.999724	0.7122
7000000187.a:SRS022609_Baylor_scaffold_56409	270.823	0.761333	0.913227	0.8337
7000000188.a:SRS053398_LANL_scaffold_29001	269.264	0.836051	0.997415	0.8382
7000000475.a:SRS020328_Baylor_scaffold_33236	267.975	0.77598	0.984596	0.7881
7000000624.a:C3240237	265.813	0.947651	0.97788	0.9691
7000000296.a:SRS024009_Baylor_scaffold_6585	265.756	0.770882	1	0.7709
7000000516.a:SRS019161_WUGC_scaffold_64473	265.726	0.739664	0.999913	0.7397
7000000184.a:SRS016954_Baylor_scaffold_3876	265.215	0.702505	1	0.7025
7000000231.a:SRS014613_WUGC_scaffold_28746	265	0.974033	0.99977	0.9743
7000000609.a:SRS056519_LANL_scaffold_35840	264.877	0.715714	0.99998	0.7157
7000000232.a:SRS015578_WUGC_scaffold_37960	264.209	0.181124	0.551309	0.3285
7000000526.a:SRS019397_WUGC_scaffold_29299	263.583	0.656632	0.991066	0.6626
7000000641.a:SRS018351_Baylor_scaffold_29504	263.096	0.596921	0.996169	0.5992
7000000481.a:SRS047014_WUGC_scaffold_78473	263	0.836859	0.999209	0.8375
7000000444.a:SRS063985_LANL_scaffold_55161	263	0.83651	0.908514	0.9207
7000000410.a:SRS019030_Baylor_scaffold_9203	262.756	0.790962	0.999998	0.791
7000000040.a:SRS043411_WUGC_scaffold_12384	261.145	0.971357	1	0.9714
7000000418.a:C3792972	261	1	0.999998	1
7000000300.a:SRS043701_LANL_scaffold_31342	260.123	0.93176	1	0.9318
7000000083.a:C15592677	260.002	0.78956	1	0.7896
7000000633.a:SRS015065_WUGC_scaffold_40560	260	0.647228	0.999107	0.6478
7000000515.a:SRS049995_LANL_scaffold_40969	260	0.960877	0.973193	0.9873
7000000690.a:SRS055982_Baylor_scaffold_18269	259.007	0.337525	0.996886	0.3386
7000000317.a:SRS014459_WUGC_scaffold_78318	257.775	0.777691	0.995568	0.7812
7000000111.a:SRS019601_WUGC_scaffold_48658	256.842	0.954129	0.958731	0.9952
7000000111.a:SRS019601_WUGC_scaffold_2387	255.975	0.958436	0.972331	0.9857
7000000385.a:SRS017433_Baylor_scaffold_5079	254.599	0.831568	0.999995	0.8316
3300003146.a:Ga0051080_1000173	253.438	0.954567	1	0.9546
7000000006.a:SRS054956_LANL_scaffold_39961	251.398	0.603266	0.991063	0.6087
7000000434.a:SRS014287_WUGC_scaffold_5928	251.112	0.286005	0.703787	0.4064
7000000186.a:SRS022524_Baylor_scaffold_13270	251.045	0.736923	0.996027	0.7399
7000000633.a:SRS015065_WUGC_scaffold_12114	250.194	0.833062	0.99767	0.835
7000000626.a:SRS064557_LANL_scaffold_27676	250.123	0.99616	1	0.9962
7000000630.a:SRS062427_LANL_scaffold_15837	249.989	0.798485	0.999561	0.7988
7000000071.a:C3429831	248.797	0.702524	0.999998	0.7025
7000000071.a:C3430683	247.916	0.888556	0.999973	0.8886
7000000022.a:SRS011452_WUGC_scaffold_912	247.094	0.776064	1	0.7761
7000000075.a:SRS016056_WUGC_scaffold_1120	247.028	0.993388	1	0.9934
7000000736.a:SRS014235_WUGC_scaffold_14063	246.533	0.721932	0.998919	0.7227
7000000131.a:SRS057717_LANL_scaffold_11165	246.285	0.924505	1	0.9245
7000000131.a:SRS057717_LANL_scaffold_11310	245.989	0.780968	0.984782	0.793
7000000628.a:SRS015782_WUGC_scaffold_41754	245.084	0.991205	0.999997	0.9912
7000000735.a:SRS015190_WUGC_scaffold_22815	244.437	0.499165	0.999995	0.4992
7000000516.a:SRS019161_WUGC_scaffold_51715	244.31	0.40101	0.878809	0.4563
7000000627.a:SRS014313_WUGC_scaffold_17472	244.139	1	1	1
7000000213.a:SRS011405_WUGC_scaffold_26356	243.934	0.749067	0.964999	0.7762
7000000481.a:SRS047014_WUGC_scaffold_69278	243.814	0.885019	0.994083	0.8903
7000000641.a:SRS018351_Baylor_scaffold_20507	243.768	0.418019	0.951646	0.4393
7000000492.a:SRS048164_WUGC_scaffold_10634	243.268	0.71248	0.983849	0.7242
7000000641.a:SRS018351_Baylor_scaffold_1004	242.599	0.570049	0.807669	0.7058
7000000181.a:SRS018656_WUGC_scaffold_12815	240.71	0.451706	0.999236	0.4521
7000000444.a:SRS063985_LANL_scaffold_6656	240.043	0.468573	0.868268	0.5397
7000000690.a:C1638496	239.725	0.194061	0.616668	0.3147
7000000069.a:SRS016095_WUGC_scaffold_499	239.183	0.307924	0.834048	0.3692
7000000641.a:SRS018351_Baylor_scaffold_32348	239.065	0.484758	0.970608	0.4994
7000000418.a:SRS012273_Baylor_scaffold_32604	239	0.563824	0.824958	0.6835
7000000334.a:SRS015217_WUGC_scaffold_16294	238.961	0.566852	0.779876	0.7268
7000000172.a:SRS020869_Baylor_scaffold_4639	238.153	0.298855	0.919017	0.3252
7000000385.a:C1841523	237	0.995103	0.999312	0.9958
7000000272.a:SRS016203_WUGC_scaffold_8984	236.644	0.918432	0.978895	0.9382
7000000352.a:SRS014923_WUGC_scaffold_38579	236	0.883626	0.951421	0.9287
7000000306.a:SRS043001_WUGC_scaffold_29736	235.514	0.792	0.999693	0.7922
7000000624.a:SRS024435_LANL_scaffold_23078	235.219	0.309156	0.692611	0.4464
7000000006.a:SRS054956_LANL_scaffold_27325	235.159	0.885269	0.972535	0.9103
7000000258.a:SRS016335_WUGC_scaffold_45281	234	0.400396	0.946903	0.4228
7000000093.a:SRS022137_LANL_scaffold_29799	233.25	0.776904	0.999998	0.7769
7000000006.a:SRS054956_LANL_scaffold_44396	232.894	0.655899	0.875226	0.7494
7000000069.a:SRS016095_WUGC_scaffold_38565	232.893	0.736606	0.922435	0.7985
3300003146.a:Ga0051080_1015683	232.183	0.591963	0.960108	0.6166
7000000302.a:SRS023914_Baylor_scaffold_27827	231.23	0.791478	0.936437	0.8452
7000000040.a:SRS043411_WUGC_scaffold_49004	230.132	0.827549	0.98086	0.8437
7000000348.a:C1923832	228.939	0.989677	0.999815	0.9899
7000000145.a:SRS050422_LANL_scaffold_47104	228.864	0.497591	0.8137	0.6115
7000000333.a:SRS050925_LANL_scaffold_59006	228.833	0.362026	0.806494	0.4489
7000000532.a:SRS011529_WUGC_scaffold_13783	228.681	0.981035	1	0.981
7000000486.a:SRS015264_WUGC_scaffold_10513	227.798	0.792242	1	0.7922
7000000475.a:SRS020328_Baylor_scaffold_36549	226.689	0.578287	0.999969	0.5783
7000000289.a:SRS024331_LANL_scaffold_25078	226.547	0.919391	1	0.9194
7000000532.a:SRS011529_WUGC_scaffold_1574	225.248	0.410605	0.999113	0.411
7000000243.a:C4025582	224.808	0.977046	1	0.977
7000000075.a:SRS016056_WUGC_scaffold_5364	224.463	0.362291	0.964386	0.3757
7000000145.a:SRS050422_LANL_scaffold_83565	223.783	0.666517	0.998981	0.6672
7000000077.a:SRS064645_LANL_scaffold_1093	223.749	0.939982	0.998411	0.9415
7000000460.a:SRS051031_LANL_scaffold_60087	222.156	0.655895	0.994135	0.6598
7000000736.a:SRS014235_WUGC_scaffold_69501	222.131	0.601914	0.999998	0.6019
7000000632.a:SRS050299_LANL_scaffold_30827	222.074	0.664647	0.992866	0.6694
7000000278.a:SRS018133_Baylor_scaffold_32432	222.008	0.97301	0.999636	0.9734
3300002898.a:draft_10007074	221.439	0.456479	0.91749	0.4975
7000000628.a:SRS015782_WUGC_scaffold_39917	220.527	0.585685	0.894452	0.6548
7000000231.a:SRS014613_WUGC_scaffold_26360	220.039	0.458914	0.789459	0.5813
7000000380.a:SRS015663_WUGC_scaffold_31145	219.721	0.934824	0.997704	0.937
7000000262.a:SRS047044_WUGC_scaffold_30445	218	0.947331	0.99997	0.9474
7000000609.a:SRS056519_LANL_scaffold_21606	217.963	0.991126	0.998451	0.9927
7000000659.a:SRS015854_WUGC_scaffold_25833	217.347	0.594982	0.999518	0.5953
7000000187.a:SRS022609_Baylor_scaffold_11937	216.225	0.337333	0.986209	0.3421
7000000262.a:SRS047044_WUGC_scaffold_10695	215.992	1	1	1
7000000460.a:SRS051031_LANL_scaffold_62496	214.482	0.451544	0.985212	0.4583
7000000158.a:SRS014979_WUGC_scaffold_36395	214.301	0.519498	0.978111	0.5311
7000000484.a:SRS016018_WUGC_scaffold_17498	213.92	0.674342	0.988436	0.6822
7000000308.a:SRS058770_LANL_scaffold_31495	213.303	0.490127	0.998631	0.4908
7000000258.a:C5290893	211	0.93102	0.999601	0.9314
7000000515.a:C2638894	209.795	0.85499	1	0.855
7000000641.a:SRS018351_Baylor_scaffold_7885	209.76	0.632352	0.743355	0.8507
7000000532.a:SRS011529_WUGC_scaffold_31722	209.153	0.927579	1	0.9276
7000000646.a:SRS015960_WUGC_scaffold_4308	209.053	0.377313	0.995865	0.3789
7000000417.a:SRS011239_Baylor_scaffold_17453	208.876	0.650506	0.999998	0.6505
7000000040.a:SRS043411_WUGC_scaffold_6149	207.612	0.7979	0.97056	0.8221
7000000069.a:C2611891	207	0.988573	0.996292	0.9923
7000000112.a:SRS011302_Baylor_scaffold_18218	206.615	0.38531	0.997957	0.3861
7000000444.a:SRS063985_LANL_scaffold_54067	206.598	0.828172	0.914246	0.9059
7000000071.a:SRS065504_LANL_scaffold_41837	206.44	0.728089	0.998902	0.7289
7000000695.a:SRS049900_LANL_scaffold_19814	206.317	0.646691	0.973049	0.6646
7000000107.a:SRS042628_WUGC_scaffold_607	206.125	0.89058	0.998617	0.8918
7000000077.a:SRS064645_LANL_scaffold_6414	206	0.934913	0.999095	0.9358
7000000320.a:SRS063040_Baylor_scaffold_59223	205.822	0.843026	1	0.843
7000000418.a:C3796595	205.611	0.615426	0.999587	0.6157
7000000112.a:SRS011302_Baylor_scaffold_10199	205.584	0.583425	0.848299	0.6878
7000000380.a:SRS015663_WUGC_scaffold_13143	205.582	0.995223	1	0.9952
7000000397.a:C3569728	205.56	0.770034	0.999383	0.7705
7000000300.a:SRS043701_LANL_scaffold_17582	205.558	0.713801	1	0.7138
7000000352.a:C3382711	205.176	0.946132	0.999993	0.9461
7000000352.a:SRS014923_WUGC_scaffold_50647	205.082	0.840096	0.996867	0.8427
7000000526.a:SRS019397_WUGC_scaffold_22739	204.718	0.527687	0.983212	0.5367
7000000532.a:C4776323	204.082	0.828107	0.999869	0.8282
7000000036.a:SRS049164_WUGC_scaffold_30020	203.82	0.5406	0.999153	0.5411
7000000661.a:SRS052027_LANL_scaffold_16499	203.514	0.566083	0.978095	0.5788
7000000040.a:SRS043411_WUGC_scaffold_3673	201.836	0.460987	0.94363	0.4885
7000000460.a:SRS051031_LANL_scaffold_39958	200.786	0.996298	1	0.9963
7000000521.a:SRS023583_Baylor_scaffold_4958	200.593	0.946656	0.993039	0.9533
7000000093.a:SRS022137_LANL_scaffold_3859	200.538	0.907317	0.999779	0.9075
7000000333.a:C2246634	199.794	0.793697	0.999077	0.7944
7000000740.a:SRS064276_LANL_scaffold_66376	198.333	0.783121	1	0.7831
7000000659.a:SRS015854_WUGC_scaffold_21877	198.294	0.999381	1	0.9994
7000000475.a:SRS020328_Baylor_scaffold_28549	198.023	0.909346	0.998675	0.9106
7000000239.a:SRS013951_WUGC_scaffold_54416	197.492	0.569083	0.998572	0.5699
7000000609.a:SRS056519_LANL_scaffold_5348	195.691	0.55569	0.998778	0.5564
7000000370.a:SRS017191_Baylor_scaffold_25785	195.298	0.786316	0.998449	0.7875
7000000231.a:SRS014613_WUGC_scaffold_31416	194.678	0.999831	0.999925	0.9999
7000000333.a:SRS050925_LANL_scaffold_73619	193.688	0.900506	0.999982	0.9005
7000000444.a:SRS063985_LANL_scaffold_57495	193.079	0.807543	0.995823	0.8109
7000000188.a:SRS053398_LANL_scaffold_41186	193.078	0.518987	0.766072	0.6775
7000000081.a:SRS017307_Baylor_scaffold_31649	192	0.960588	0.975037	0.9852
7000000077.a:SRS064645_LANL_scaffold_229	191.821	0.88298	0.997791	0.8849
3300003140.a:Ga0051081_1009321	190.801	0.968823	0.986257	0.9823
7000000669.a:SRS022713_LANL_scaffold_20106	190.62	0.250105	0.679707	0.368
7000000646.a:SRS015960_WUGC_scaffold_4748	189.606	0.772952	1	0.773
7000000628.a:SRS015782_WUGC_scaffold_8197	189.422	0.975948	0.996291	0.9796
7000000239.a:SRS013951_WUGC_scaffold_47254	189.045	0.99989	1	0.9999
7000000633.a:SRS015065_WUGC_scaffold_42565	189.037	0.873845	0.987488	0.8849
7000000100.a:SRS018817_WUGC_scaffold_24100	189.022	0.482756	0.956979	0.5045
7000000526.a:SRS019397_WUGC_scaffold_24605	188.915	0.949762	0.999998	0.9498
7000000570.a:SRS051882_Baylor_scaffold_8717	188.305	0.399295	0.991029	0.4029
7000000418.a:C3798077	188.283	0.894806	0.999993	0.8948
7000000200.a:SRS023526_Baylor_scaffold_24368	188.205	0.871725	1	0.8717
7000000490.a:C1875731	187.585	0.82748	0.999374	0.828
7000000526.a:SRS019397_WUGC_scaffold_26943	186.999	0.400198	0.859365	0.4657
7000000334.a:SRS015217_WUGC_scaffold_39375	186.604	0.996641	1	0.9966
7000000380.a:SRS015663_WUGC_scaffold_24762	186.326	0.999407	1	0.9994
7000000475.a:SRS020328_Baylor_scaffold_38663	186	0.222944	0.511456	0.4359
7000000486.a:SRS015264_WUGC_scaffold_3699	185.896	0.285118	0.689354	0.4136
7000000045.a:SRS013687_Baylor_scaffold_18929	185	0.268324	0.801736	0.3347
7000000418.a:SRS012273_Baylor_scaffold_10390	184.572	0.309313	0.920138	0.3362
7000000630.a:SRS062427_LANL_scaffold_10819	184.5	0.727108	0.999211	0.7277
7000000069.a:SRS016095_WUGC_scaffold_33065	184.097	0.46191	0.980931	0.4709
7000000475.a:SRS020328_Baylor_scaffold_38845	183.792	0.395725	0.903719	0.4379
7000000498.a:SRS017521_Baylor_scaffold_31148	183.682	0.524041	0.993092	0.5277
7000000403.a:SRS024388_LANL_scaffold_15622	183.669	0.968616	0.999431	0.9692
7000000192.a:SRS017821_Baylor_scaffold_4645	182	0.313207	0.662797	0.4726
7000000036.a:SRS049164_WUGC_scaffold_29471	181.992	0.295985	0.687715	0.4304
7000000628.a:SRS015782_WUGC_scaffold_40061	181.742	0.742763	0.955473	0.7774
7000000081.a:SRS017307_Baylor_scaffold_32974	181.032	0.520379	0.997706	0.5216
7000000258.a:SRS016335_WUGC_scaffold_7886	180.807	0.257013	0.576455	0.4459
7000000624.a:SRS024435_LANL_scaffold_18853	180.771	0.191881	0.379387	0.5058
7000000045.a:SRS013687_Baylor_scaffold_59607	180.573	0.755747	0.97095	0.7784
7000000317.a:SRS014459_WUGC_scaffold_65127	180.101	0.967493	1	0.9675
7000000397.a:SRS011586_WUGC_scaffold_33288	180	0.69547	0.951455	0.731
7000000624.a:C3238888	178.512	0.682818	0.996275	0.6854
7000000370.a:SRS017191_Baylor_scaffold_7921	178.299	0.894154	1	0.8942
7000000333.a:SRS050925_LANL_scaffold_38431	178	0.815632	0.908166	0.8981
7000000012.a:SRS018313_Baylor_scaffold_1909	176.58	0.343156	0.905511	0.379
7000000418.a:SRS012273_Baylor_scaffold_31987	176.45	0.363365	0.946188	0.384
7000000100.a:SRS018817_WUGC_scaffold_11933	176.159	0.479193	0.987821	0.4851
7000000498.a:SRS017521_Baylor_scaffold_21531	175.939	0.93791	0.999549	0.9383
7000000329.a:SRS016495_LANL_scaffold_19678	175.766	0.988361	1	0.9884
7000000302.a:SRS023914_Baylor_scaffold_5392	175.675	0.787662	0.999999	0.7877
7000000272.a:C1593689	174.038	0.990022	0.999914	0.9901
7000000684.a:SRS019582_WUGC_scaffold_26869	173.405	0.34273	0.999398	0.3429
7000000320.a:C3357091	171.445	0.711212	1	0.7112
7000000022.a:SRS011452_WUGC_scaffold_2332	171.363	0.967322	1	0.9673
7000000418.a:C3798771	171	0.964951	0.990825	0.9739
7000000296.a:SRS024009_Baylor_scaffold_694	170.701	0.539602	0.999681	0.5398
3300002898.a:draft_10002023	170.387	0.3195	0.678069	0.4712
7000000373.a:SRS016989_Baylor_scaffold_8433	169.828	0.9395	1	0.9395
7000000334.a:C2390986	169	0.982304	0.979883	0.9975
7000000628.a:SRS015782_WUGC_scaffold_41222	168.962	0.834438	0.925791	0.9013
7000000385.a:SRS017433_Baylor_scaffold_13147	168.057	0.775286	0.902843	0.8587
7000000441.a:SRS015794_Baylor_scaffold_27481	168	0.44472	0.954502	0.4659
3300003146.a:Ga0051080_1014625	167.972	0.282682	0.911273	0.3102
7000000486.a:SRS015264_WUGC_scaffold_56561	167.912	0.390927	0.991617	0.3942
7000000444.a:SRS063985_LANL_scaffold_18651	167.73	0.394035	0.826639	0.4767
7000000740.a:SRS064276_LANL_scaffold_45740	167.708	0.943439	0.996593	0.9467
7000000186.a:SRS022524_Baylor_scaffold_62690	167	0.895882	0.937248	0.9559
7000000486.a:SRS015264_WUGC_scaffold_19308	166.767	0.953058	0.999997	0.9531
7000000646.a:SRS015960_WUGC_scaffold_31617	165.716	0.504494	0.999787	0.5046
7000000308.a:SRS058770_LANL_scaffold_14019	164.707	0.307053	0.856802	0.3584
7000000107.a:SRS042628_WUGC_scaffold_24205	164.318	0.329546	0.930191	0.3543
7000000521.a:SRS023583_Baylor_scaffold_6618	162.97	0.531452	0.998913	0.532
7000000145.a:SRS050422_LANL_scaffold_92522	162.695	0.997936	1	0.9979
7000000142.a:C1101604	162.494	1	1	1
7000000655.a:SRS019968_Baylor_scaffold_26787	162.077	0.909622	0.999976	0.9096
7000000262.a:SRS047044_WUGC_scaffold_22477	161.863	0.963289	0.998743	0.9645
7000000626.a:SRS064557_LANL_scaffold_32818	161.591	0.432307	0.999867	0.4324
7000000045.a:SRS013687_Baylor_scaffold_14202	161.001	0.602588	0.951849	0.6331
7000000158.a:SRS014979_WUGC_scaffold_16138	160.554	0.87885	1	0.8788
7000000570.a:SRS051882_Baylor_scaffold_30050	160.51	0.95056	0.999829	0.9507
7000000317.a:C2701553	160.437	0.925216	0.999799	0.9254
7000000192.a:SRS017821_Baylor_scaffold_24965	159.478	0.73386	1	0.7339
7000000475.a:SRS020328_Baylor_scaffold_36784	159.314	0.680102	0.99973	0.6803
7000000460.a:SRS051031_LANL_scaffold_54450	159.275	0.341935	0.851877	0.4014
7000000012.a:SRS018313_Baylor_scaffold_15562	159.159	0.68966	0.981998	0.7023
7000000498.a:SRS017521_Baylor_scaffold_48923	159	0.265694	0.627607	0.4233
7000000258.a:C5291617	158.918	0.98749	0.999273	0.9882
7000000075.a:SRS016056_WUGC_scaffold_13349	158.491	0.977665	0.999951	0.9777
7000000659.a:SRS015854_WUGC_scaffold_24201	158.293	0.253871	0.829189	0.3062
7000000333.a:SRS050925_LANL_scaffold_41349	158.264	0.979747	1	0.9797
7000000040.a:SRS043411_WUGC_scaffold_45481	158	0.29004	0.930715	0.3116
7000000418.a:SRS012273_Baylor_scaffold_19058	157.957	0.305533	0.989239	0.3089
7000000158.a:SRS014979_WUGC_scaffold_24901	157.76	0.866767	1	0.8668
7000000308.a:SRS058770_LANL_scaffold_39481	157.263	0.988947	0.999693	0.9892
7000000372.a:SRS045713_WUGC_scaffold_23614	157.163	0.55451	0.977648	0.5672
7000000112.a:SRS011302_Baylor_scaffold_4048	156.903	0.281462	0.873716	0.3221
7000000690.a:SRS055982_Baylor_scaffold_18510	156.609	0.314574	0.647069	0.4862
7000000459.a:SRS012902_Baylor_scaffold_933	154.464	0.500358	0.998659	0.501
7000000417.a:SRS011239_Baylor_scaffold_497	154.054	0.479701	0.660239	0.7266
7000000077.a:C469590	153.74	0.991954	0.999882	0.9921
7000000380.a:C3130888	153.543	0.91849	0.998506	0.9199
7000000239.a:SRS013951_WUGC_scaffold_23277	153.273	0.979906	0.99373	0.9861
7000000582.a:SRS019787_WUGC_scaffold_23775	152.749	0.799694	1	0.7997
7000000401.a:SRS011271_WUGC_scaffold_21650	152.131	1	1	1
7000000403.a:SRS024388_LANL_scaffold_14965	152	0.876702	0.991257	0.8844
7000000231.a:SRS014613_WUGC_scaffold_22672	151.932	0.954163	0.999757	0.9544
7000000069.a:SRS016095_WUGC_scaffold_6087	151.888	0.920183	0.978126	0.9408
7000000587.a:C751183	151.393	0.683792	0.999921	0.6838
7000000107.a:SRS042628_WUGC_scaffold_10193	151.079	0.317504	0.994774	0.3192
7000000515.a:SRS049995_LANL_scaffold_39163	150.359	0.654072	0.926794	0.7057
7000000192.a:SRS017821_Baylor_scaffold_18745	150.193	0.702525	0.987697	0.7113
7000000352.a:SRS014923_WUGC_scaffold_28776	149.92	0.502313	0.999998	0.5023
7000000252.a:C2209264	149.245	0.878987	0.999496	0.8794
7000000546.a:SRS019910_WUGC_scaffold_24072	149.225	0.273913	0.747048	0.3667
7000000401.a:SRS011271_WUGC_scaffold_17213	148.942	0.435222	1	0.4352
7000000232.a:SRS015578_WUGC_scaffold_29761	148.678	0.537072	0.929624	0.5777
7000000570.a:SRS051882_Baylor_scaffold_8977	148.33	0.648305	0.987861	0.6563
7000000740.a:SRS064276_LANL_scaffold_37879	148	0.932772	0.96311	0.9685
7000000069.a:SRS016095_WUGC_scaffold_15442	146.57	0.892045	0.999981	0.8921
7000000171.a:SRS052697_LANL_scaffold_4602	146.281	0.640047	0.843343	0.7589
7000000045.a:SRS013687_Baylor_scaffold_57499	146	0.448405	0.634239	0.707
7000000531.a:SRS049959_WUGC_scaffold_11451	145.216	0.636488	0.981777	0.6483
7000000455.a:C5192154	144.86	0.993758	0.999904	0.9939
7000000464.a:SRS077730_LANL_scaffold_16842	144.427	0.768585	1	0.7686
7000000334.a:SRS015217_WUGC_scaffold_14773	144.377	0.509891	0.897797	0.5679
7000000418.a:SRS012273_Baylor_scaffold_31399	144	0.942996	0.957426	0.9849
7000000232.a:SRS015578_WUGC_scaffold_34612	142.583	0.625236	0.878474	0.7117
7000000036.a:SRS049164_WUGC_scaffold_94596	142.108	0.79262	0.999957	0.7927
7000000492.a:C2361982	142.098	0.533207	1	0.5332
7000000111.a:SRS019601_WUGC_scaffold_13357	141.977	0.448199	0.910726	0.4921
7000000333.a:SRS050925_LANL_scaffold_74052	141.518	0.525182	0.988357	0.5314
7000000641.a:SRS018351_Baylor_scaffold_30620	140.883	0.720058	0.999998	0.7201
7000000444.a:SRS063985_LANL_scaffold_10636	140.275	0.216878	0.557392	0.3891
7000000187.a:SRS022609_Baylor_scaffold_72992	140.148	0.43508	0.737149	0.5902
7000000200.a:SRS023526_Baylor_scaffold_9740	140.024	0.800841	0.999869	0.8009
7000000333.a:SRS050925_LANL_scaffold_45871	139.951	0.284803	0.879993	0.3236
7000000158.a:SRS014979_WUGC_scaffold_36155	139.738	0.806444	0.88279	0.9135
7000000334.a:SRS015217_WUGC_scaffold_6542	139.719	0.346725	0.919013	0.3773
7000000736.a:SRS014235_WUGC_scaffold_50587	139.534	0.890718	0.999354	0.8913
7000000142.a:SRS016753_Baylor_scaffold_13798	139.178	0.955227	0.975392	0.9793
7000000071.a:SRS065504_LANL_scaffold_51713	138.059	0.963424	0.99917	0.9642
7000000193.a:SRS048870_WUGC_scaffold_26582	137.498	0.709354	0.974137	0.7282
7000000231.a:SRS014613_WUGC_scaffold_12192	136.559	0.696883	0.999761	0.697
7000000460.a:SRS051031_LANL_scaffold_9021	136.391	0.137309	0.295467	0.4647
7000000193.a:SRS048870_WUGC_scaffold_50367	135.59	0.638726	0.993805	0.6427
7000000582.a:SRS019787_WUGC_scaffold_10271	134.822	0.253467	0.60303	0.4203
7000000094.a:SRS024549_LANL_scaffold_3060	134.694	0.908436	0.999182	0.9092
7000000006.a:SRS054956_LANL_scaffold_14393	134.318	0.61001	1	0.61
7000000045.a:SRS013687_Baylor_scaffold_21615	134.124	0.286318	0.896877	0.3192
7000000441.a:SRS015794_Baylor_scaffold_29877	133.823	0.514882	0.942142	0.5465
7000000171.a:SRS052697_LANL_scaffold_65800	133.615	0.264652	0.721745	0.3667
7000000187.a:SRS022609_Baylor_scaffold_67070	133.241	0.268416	0.831464	0.3228
7000000100.a:C2137516	133.043	0.913381	0.999381	0.9139
7000000188.a:SRS053398_LANL_scaffold_45878	132.72	0.574069	0.971494	0.5909
7000000071.a:C3429893	132.475	0.943683	1	0.9437
7000000532.a:C4775941	132.436	0.370374	0.963366	0.3845
7000000546.a:SRS019910_WUGC_scaffold_69936	131.136	0.924399	0.999986	0.9244
7000000570.a:SRS051882_Baylor_scaffold_7329	130.827	0.277185	0.706486	0.3923
7000000531.a:SRS049959_WUGC_scaffold_14215	130.17	0.530215	0.85129	0.6228
7000000715.a:SRS014683_WUGC_scaffold_52300	130.15	0.577487	0.936519	0.6166
7000000317.a:SRS014459_WUGC_scaffold_94545	129.646	0.586928	0.985584	0.5955
7000000258.a:C5291967	129	0.530694	0.922575	0.5752
7000000258.a:SRS016335_WUGC_scaffold_29794	129	0.216629	0.601624	0.3601
7000000193.a:SRS048870_WUGC_scaffold_51544	128.764	0.404359	0.872175	0.4636
7000000628.a:C3504539	128.31	0.90539	0.945421	0.9577
7000000045.a:SRS013687_Baylor_scaffold_35593	128	0.401784	0.594707	0.6756
7000000200.a:SRS023526_Baylor_scaffold_35799	127.823	0.69335	0.997902	0.6948
7000000410.a:SRS019030_Baylor_scaffold_21696	127.276	0.427838	0.898379	0.4762
7000000232.a:SRS015578_WUGC_scaffold_39883	126.757	0.194654	0.43439	0.4481
7000000441.a:SRS015794_Baylor_scaffold_35365	126.495	0.405809	0.904583	0.4486
7000000334.a:SRS015217_WUGC_scaffold_23760	126	0.270817	0.659489	0.4106
7000000271.a:SRS053335_LANL_scaffold_9615	125.351	0.947506	0.977116	0.9697
7000000232.a:SRS015578_WUGC_scaffold_2456	124.996	0.653694	0.999914	0.6538
7000000334.a:SRS015217_WUGC_scaffold_24320	124.581	0.692474	0.975801	0.7096
7000000012.a:SRS018313_Baylor_scaffold_9415	124.562	0.342642	0.877675	0.3904
7000000532.a:SRS011529_WUGC_scaffold_31497	124.554	0.768283	1	0.7683
7000000187.a:SRS022609_Baylor_scaffold_26530	124.35	0.676478	0.988971	0.684
7000000188.a:SRS053398_LANL_scaffold_45612	124.194	0.146185	0.455669	0.3208
7000000531.a:SRS049959_WUGC_scaffold_37177	124	0.960495	0.991606	0.9686
7000000385.a:SRS017433_Baylor_scaffold_18739	123.822	0.742751	0.904673	0.821
3300000059.a:PaHGMunAill_c0002734	123.432	0.277439	0.914933	0.3032
7000000433.a:SRS050752_LANL_scaffold_17525	123.206	0.398913	0.631868	0.6313
7000000370.a:SRS017191_Baylor_scaffold_10269	123.115	0.400284	0.914001	0.4379
7000000715.a:SRS014683_WUGC_scaffold_51928	122.783	0.337384	0.803326	0.42
7000000112.a:SRS011302_Baylor_scaffold_3796	122.587	0.529793	0.820103	0.646
7000000171.a:SRS052697_LANL_scaffold_54647	122.574	0.773352	0.955935	0.809
7000000521.a:SRS023583_Baylor_scaffold_1032	122.431	0.78667	0.997309	0.7888
7000000188.a:SRS053398_LANL_scaffold_48035	122.405	0.505962	0.972955	0.52
7000000107.a:C2756325	122.396	1	1	1
7000000570.a:SRS051882_Baylor_scaffold_3113	122.135	0.6739	1	0.6739
7000000626.a:SRS064557_LANL_scaffold_32683	122	0.30977	0.988226	0.3135
7000000112.a:SRS011302_Baylor_scaffold_5768	121.961	0.989443	1	0.9894
7000000271.a:SRS053335_LANL_scaffold_30027	121.83	0.520533	0.852143	0.6109
7000000515.a:SRS049995_LANL_scaffold_14449	121	0.172515	0.5336	0.3233
7000000006.a:SRS054956_LANL_scaffold_40515	120.938	0.210174	0.518978	0.405
7000000258.a:SRS016335_WUGC_scaffold_45122	120.33	0.801837	0.995827	0.8052
7000000633.a:SRS015065_WUGC_scaffold_14802	120.288	0.746448	0.999835	0.7466
7000000481.a:SRS047014_WUGC_scaffold_57424	120.252	0.826579	1	0.8266
7000000475.a:SRS020328_Baylor_scaffold_31930	120	0.38021	0.974658	0.3901
7000000036.a:SRS049164_WUGC_scaffold_78547	119.396	0.750901	1	0.7509
7000000403.a:C1508528	119.288	0.413002	0.977512	0.4225
7000000087.a:C2385192	119.187	0.525436	0.972207	0.5405
7000000297.a:C1924856	118.869	0.64239	0.998842	0.6431
7000000011.a:SRS053214_LANL_scaffold_12582	118.569	0.999415	1	0.9994
7000000549.a:C1584946	117.922	0.882048	0.999859	0.8822
7000000265.a:C2879104	117.829	0.940972	1	0.941
7000000531.a:SRS049959_WUGC_scaffold_47592	117.754	0.767151	0.999184	0.7678
7000000690.a:SRS055982_Baylor_scaffold_15216	117.683	0.482507	0.946331	0.5099
7000000297.a:SRS056259_LANL_scaffold_8338	117.508	0.632706	0.792412	0.7985
3300003140.a:Ga0051081_1006379	117.404	0.701446	0.821085	0.8543
7000000475.a:SRS020328_Baylor_scaffold_33279	117.298	0.727962	0.966403	0.7533
7000000192.a:SRS017821_Baylor_scaffold_5619	116.983	0.900568	0.999248	0.9012
7000000630.a:SRS062427_LANL_scaffold_4175	116.728	0.637581	0.978392	0.6517
7000000191.a:C3073209	116.496	0.915076	0.999044	0.916
3300003146.a:Ga0051080_1017340	116.334	0.547836	0.95572	0.5732
7000000695.a:SRS049900_LANL_scaffold_6451	116.174	0.626425	0.991951	0.6315
7000000187.a:SRS022609_Baylor_scaffold_90200	116.009	0.272513	0.720066	0.3785
7000000628.a:SRS015782_WUGC_scaffold_40312	115.745	0.586349	0.831537	0.7051
7000000262.a:SRS047044_WUGC_scaffold_25765	115.672	0.700701	0.999951	0.7007
7000000455.a:C5192374	115.186	0.776683	0.995869	0.7799
3300003146.a:Ga0051080_1017446	115.008	0.804315	0.999923	0.8044
7000000646.a:SRS015960_WUGC_scaffold_2062	115	0.149696	0.367344	0.4075
7000000403.a:C1508552	114.733	0.869631	0.999748	0.8698
7000000243.a:C4025848	114.729	0.361938	0.967562	0.3741
7000000192.a:C2499691	113.859	1	1	1
7000000735.a:SRS015190_WUGC_scaffold_10384	113.668	0.921537	0.95693	0.963
7000000032.a:SRS024132_Baylor_scaffold_35916	113.568	0.600565	0.992281	0.6052
7000000333.a:C2246552	113.453	0.993372	1	0.9934
7000000200.a:SRS023526_Baylor_scaffold_35863	113.211	0.728014	0.880449	0.8269
7000000145.a:SRS050422_LANL_scaffold_80286	112.067	0.343612	0.950573	0.3615
7000000486.a:SRS015264_WUGC_scaffold_69769	111.711	0.624951	0.981971	0.6364
7000000531.a:SRS049959_WUGC_scaffold_59193	111.706	0.519276	0.977286	0.5313
7000000515.a:C2637932	111.583	0.818381	1	0.8184
7000000246.a:SRS078176_LANL_scaffold_6277	111.583	0.818381	1	0.8184
7000000045.a:SRS013687_Baylor_scaffold_48342	111.46	0.999446	1	0.9994
7000000289.a:SRS024331_LANL_scaffold_32242	111.249	0.395926	0.998229	0.3966
7000000385.a:SRS017433_Baylor_scaffold_19041	110.79	0.215318	0.444563	0.4843
7000000272.a:C1593853	110.497	0.99295	0.99993	0.993
7000000632.a:SRS050299_LANL_scaffold_6154	110.324	0.444786	0.621345	0.7158
7000000715.a:C1655542	110.264	0.416191	0.846123	0.4919
7000000418.a:C3799305	110.17	0.823769	0.950518	0.8667
3300003155.a:Ga0052270_10359829	110.087	0.312125	0.510244	0.6117
7000000401.a:SRS011271_WUGC_scaffold_1368	110.047	0.909695	0.982945	0.9255
7000000038.a:C4277215	110	0.892938	0.895707	0.9969
7000000296.a:C1830350	109.908	0.328342	0.864074	0.38
7000000045.a:SRS013687_Baylor_scaffold_34257	109.345	0.352205	0.477481	0.7376
7000000045.a:SRS013687_Baylor_scaffold_43641	109.226	0.997011	1	0.997
7000000526.a:SRS019397_WUGC_scaffold_31672	109.145	0.507634	0.950013	0.5343
7000000069.a:SRS016095_WUGC_scaffold_37872	109	0.608224	0.755329	0.8052
7000000475.a:SRS020328_Baylor_scaffold_29209	108.967	0.874717	0.995939	0.8783
7000000609.a:SRS056519_LANL_scaffold_7946	108.881	0.504735	0.973658	0.5184
7000000308.a:SRS058770_LANL_scaffold_33090	108.419	0.952399	0.999429	0.9529
7000000532.a:SRS011529_WUGC_scaffold_17557	107.964	0.955645	0.999972	0.9557
7000000045.a:SRS013687_Baylor_scaffold_35352	107	0.419585	0.683496	0.6139
7000000186.a:SRS022524_Baylor_scaffold_76532	106.716	0.779948	0.862011	0.9048
7000000735.a:SRS015190_WUGC_scaffold_25958	106.57	0.826993	0.976506	0.8469
7000000098.a:C940628	106.461	0.320371	0.819428	0.391
7000000498.a:SRS017521_Baylor_scaffold_56819	106.26	1	0.999926	0.9999
7000000498.a:SRS017521_Baylor_scaffold_37849	106	0.869603	0.874674	0.9942
7000000112.a:SRS011302_Baylor_scaffold_21195	105.942	0.451226	0.885244	0.5097
7000000142.a:SRS016753_Baylor_scaffold_3218	105.364	0.976668	0.996996	0.9796
7000000498.a:SRS017521_Baylor_scaffold_55733	104.569	0.340142	0.725445	0.4689
7000000609.a:SRS056519_LANL_scaffold_34257	104.45	0.786831	0.999868	0.7869
7000000069.a:C2613119	104	0.218849	0.680597	0.3216
7000000407.a:SRS019267_WUGC_scaffold_10268	103.865	0.522828	0.999997	0.5228
7000000107.a:C2757942	103.598	0.999431	1	0.9994
7000000490.a:C1876331	103.154	0.5372	0.946808	0.5674
7000000191.a:C3074887	103.09	0.24619	0.560796	0.439
7000000172.a:SRS020869_Baylor_scaffold_17752	103	0.836126	0.910935	0.9179
7000000069.a:SRS016095_WUGC_scaffold_29050	102.958	0.486432	0.906539	0.5366
7000000107.a:SRS042628_WUGC_scaffold_13594	102.62	0.298763	0.86129	0.3469
7000000669.a:SRS022713_LANL_scaffold_7181	102.193	0.285471	0.820697	0.3478
7000000624.a:SRS024435_LANL_scaffold_33615	102.055	0.977413	0.979908	0.9975
7000000441.a:C2326996	101.793	0.327887	0.917482	0.3574
7000000112.a:SRS011302_Baylor_scaffold_24370	101.322	0.308989	0.756187	0.4086
7000000071.a:SRS065504_LANL_scaffold_41506	100.866	0.453267	0.899709	0.5038
7000000515.a:SRS049995_LANL_scaffold_37491	100.701	0.283519	0.942752	0.3007
7000000317.a:SRS014459_WUGC_scaffold_95727	100.033	0.286324	0.948006	0.302
7000000460.a:SRS051031_LANL_scaffold_74846	100	0.150319	0.452438	0.3322
3300002898.a:draft_10019077	99.8932	0.54091	0.894934	0.6044
7000000492.a:SRS048164_WUGC_scaffold_8644	99.8807	0.615669	0.999366	0.6161
7000000111.a:SRS019601_WUGC_scaffold_42922	99.8609	0.805621	0.954811	0.8437
7000000045.a:SRS013687_Baylor_scaffold_37560	99.3332	0.592083	0.999598	0.5923
7000000302.a:SRS023914_Baylor_scaffold_19472	99.0962	0.998321	1	0.9983
7000000531.a:SRS049959_WUGC_scaffold_60359	99.0833	0.482471	0.921382	0.5236
7000000397.a:SRS011586_WUGC_scaffold_928	98.921	0.998518	1	0.9985
7000000559.a:SRS058723_Baylor_scaffold_11877	98.4599	0.924343	0.989851	0.9338
7000000475.a:SRS020328_Baylor_scaffold_8726	97.9235	0.992173	1	0.9922
7000000300.a:SRS043701_LANL_scaffold_8729	97.8464	0.270064	0.553161	0.4882
7000000486.a:SRS015264_WUGC_scaffold_57793	97.6701	0.194182	0.427072	0.4547
7000000538.a:SRS024075_LANL_scaffold_4133	97.5629	0.408692	0.63452	0.6441
7000000401.a:SRS011271_WUGC_scaffold_21242	97.493	0.371966	0.881063	0.4222
7000000188.a:SRS053398_LANL_scaffold_1381	97.169	0.973892	1	0.9739
7000000740.a:SRS064276_LANL_scaffold_52124	96.9745	0.916427	0.999641	0.9168
7000000308.a:SRS058770_LANL_scaffold_39961	96.8325	0.597894	0.852378	0.7014
7000000188.a:SRS053398_LANL_scaffold_43456	96.7597	0.461194	0.977768	0.4717
7000000380.a:SRS015663_WUGC_scaffold_47579	96.4953	0.24824	0.426337	0.5823
7000000515.a:SRS049995_LANL_scaffold_14823	96.011	0.952409	0.99566	0.9566
7000000380.a:SRS015663_WUGC_scaffold_47728	96	0.433401	0.746234	0.5808
7000000262.a:SRS047044_WUGC_scaffold_30549	95.7778	0.7602	0.999993	0.7602
7000000296.a:SRS024009_Baylor_scaffold_15752	95.6082	0.309494	0.958115	0.323
7000000434.a:SRS014287_WUGC_scaffold_33026	95.3199	0.170399	0.519262	0.3282
7000000444.a:SRS063985_LANL_scaffold_40030	95	0.275716	0.573764	0.4805
7000000188.a:SRS053398_LANL_scaffold_34423	94.6093	0.269251	0.782492	0.3441
7000000317.a:SRS014459_WUGC_scaffold_51356	94.3278	0.996151	0.999992	0.9962
7000000460.a:SRS051031_LANL_scaffold_75896	94.133	0.841892	0.99944	0.8424
7000000187.a:SRS022609_Baylor_scaffold_91369	94.0246	0.810537	0.998568	0.8117
7000000158.a:C3311271	94	0.369506	0.962843	0.3838
7000000633.a:SRS015065_WUGC_scaffold_34940	93.9522	0.877865	0.999929	0.8779
7000000334.a:SRS015217_WUGC_scaffold_38815	93.8814	0.962775	0.982613	0.9798
7000000302.a:SRS023914_Baylor_scaffold_28174	93.767	0.52006	0.991914	0.5243
7000000271.a:SRS053335_LANL_scaffold_31252	93.5144	0.721571	0.958235	0.753
7000000418.a:C3795124	93.4996	0.591219	0.999966	0.5912
7000000142.a:SRS016753_Baylor_scaffold_5343	93.3534	0.381131	0.954493	0.3993
7000000006.a:SRS054956_LANL_scaffold_43543	93.2023	0.21786	0.640384	0.3402
7000000521.a:SRS023583_Baylor_scaffold_11310	93.048	0.369416	0.819216	0.4509
7000000418.a:SRS012273_Baylor_scaffold_23271	93	0.283003	0.694616	0.4074
7000000484.a:SRS016018_WUGC_scaffold_16697	92.9345	0.388085	0.936725	0.4143
7000000641.a:C2815243	92.8451	0.686504	0.946094	0.7256
3300003146.a:Ga0051080_1002669	92.8188	0.860912	0.969873	0.8877
7000000628.a:SRS015782_WUGC_scaffold_41587	91.7909	0.398842	0.999785	0.3989
7000000661.a:SRS052027_LANL_scaffold_2577	91.2694	0.470602	0.69062	0.6814
7000000459.a:SRS012902_Baylor_scaffold_6075	91.2527	0.569876	0.735971	0.7743
7000000300.a:SRS043701_LANL_scaffold_19652	91.0801	0.977733	1	0.9777
7000000186.a:SRS022524_Baylor_scaffold_63178	91	0.998031	0.982155	0.9841
7000000258.a:SRS016335_WUGC_scaffold_4444	90.9645	0.352104	0.750165	0.4694
7000000193.a:SRS048870_WUGC_scaffold_21251	90.9488	0.964168	1	0.9642
7000000045.a:SRS013687_Baylor_scaffold_56407	90.9388	0.737122	0.91687	0.804
7000000736.a:SRS014235_WUGC_scaffold_73179	90.6919	0.369767	0.94257	0.3923
7000000661.a:SRS052027_LANL_scaffold_25106	90.3829	0.176329	0.579853	0.3041
7000000045.a:SRS013687_Baylor_scaffold_59707	90.3296	0.43595	0.982308	0.4438
7000000334.a:SRS015217_WUGC_scaffold_38268	90.151	0.981038	0.986916	0.994
7000000258.a:SRS016335_WUGC_scaffold_23872	90.0601	0.818513	0.991807	0.8253
7000000302.a:SRS023914_Baylor_scaffold_35417	89.8625	0.610617	0.855822	0.7135
7000000333.a:SRS050925_LANL_scaffold_48374	89.681	0.4743	0.55792	0.8501
7000000418.a:SRS012273_Baylor_scaffold_6350	89	0.929978	0.952491	0.9764
7000000475.a:SRS020328_Baylor_scaffold_26075	89	0.458602	0.921933	0.4974
7000000069.a:SRS016095_WUGC_scaffold_21415	88.2333	0.954109	0.999993	0.9541
7000000546.a:SRS019910_WUGC_scaffold_22870	87.895	0.861548	0.991325	0.8691
7000000380.a:C3133072	87.8466	0.309538	0.621863	0.4978
7000000317.a:SRS014459_WUGC_scaffold_77787	87.7946	0.922509	0.999459	0.923
7000000455.a:C5192676	87	0.698229	0.836588	0.8346
7000000352.a:C3383345	86.9404	0.580184	0.876983	0.6616
7000000444.a:SRS063985_LANL_scaffold_18794	86.8914	0.637794	0.985195	0.6474
7000000587.a:C751375	86.8273	0.482881	0.996131	0.4848
7000000516.a:SRS019161_WUGC_scaffold_65593	86.4369	0.680075	0.902596	0.7535
7000000069.a:SRS016095_WUGC_scaffold_1149	86.1237	0.741665	0.993885	0.7462
7000000213.a:SRS011405_WUGC_scaffold_9768	86.1137	0.269416	0.833126	0.3234
7000000107.a:SRS042628_WUGC_scaffold_3415	85.9951	0.612128	0.993924	0.6159
7000000418.a:SRS012273_Baylor_scaffold_12834	85.4221	0.872911	0.980913	0.8899
7000000188.a:SRS053398_LANL_scaffold_2210	85.3817	0.412968	0.662034	0.6238
7000000570.a:C2595401	84.7239	0.962539	0.986664	0.9755
7000000570.a:SRS051882_Baylor_scaffold_30	84.6571	0.998293	1	0.9983
7000000053.a:C694232	84.6017	0.976712	0.987013	0.9896
7000000624.a:SRS024435_LANL_scaffold_33797	84.4257	0.772785	1	0.7728
7000000410.a:SRS019030_Baylor_scaffold_2022	84.2725	0.293614	0.80855	0.3631
7000000187.a:SRS022609_Baylor_scaffold_11557	84.2691	0.471815	0.928368	0.5082
7000000122.a:SRS042284_WUGC_scaffold_2929	84.0535	0.542319	0.999955	0.5423
7000000434.a:SRS014287_WUGC_scaffold_33195	84.0145	0.433991	0.672936	0.6449
7000000352.a:SRS014923_WUGC_scaffold_57338	83.636	0.775992	0.999541	0.7763
7000000579.a:C2738758	83.6227	0.994799	0.999953	0.9948
7000000433.a:SRS050752_LANL_scaffold_28795	82.9331	0.595379	0.987475	0.6029
7000000334.a:SRS015217_WUGC_scaffold_19867	82.8624	0.71642	0.789903	0.907
7000000460.a:SRS051031_LANL_scaffold_75555	82.7925	0.385238	0.833625	0.4621
7000000546.a:SRS019910_WUGC_scaffold_7419	82.7294	0.804917	0.993798	0.8099
7000000193.a:SRS048870_WUGC_scaffold_16176	82.1846	0.445916	0.671026	0.6645
7000000475.a:SRS020328_Baylor_scaffold_36813	82.0227	0.712491	0.98322	0.7247
3300003155.a:Ga0052270_10012176	82	0.444645	0.826514	0.538
3300003125.a:Ga0052232_100862	81.3795	0.312076	0.749223	0.4165
7000000740.a:SRS064276_LANL_scaffold_16784	80.9719	0.869193	0.999966	0.8692
7000000417.a:SRS011239_Baylor_scaffold_28983	80.5431	0.568272	0.762127	0.7456
7000000300.a:SRS043701_LANL_scaffold_3655	80.4509	0.887716	1	0.8877
7000000239.a:SRS013951_WUGC_scaffold_4432	80.3784	0.29417	0.884171	0.3327
7000000231.a:SRS014613_WUGC_scaffold_12629	80.1834	0.920944	1	0.9209
7000000087.a:C2384586	80	0.564158	0.871463	0.6474
7000000006.a:SRS054956_LANL_scaffold_9774	79.7685	0.189798	0.553011	0.3432
7000000006.a:SRS054956_LANL_scaffold_30101	79.6618	0.605699	0.633739	0.9558
7000000075.a:SRS016056_WUGC_scaffold_5444	79.3487	0.968159	0.977206	0.9907
3300003155.a:Ga0052270_10305463	79.3224	0.694021	0.985287	0.7044
7000000526.a:SRS019397_WUGC_scaffold_23811	79.23	0.598045	0.938184	0.6374
7000000243.a:C4025868	79	0.220754	0.710752	0.3106
7000000486.a:SRS015264_WUGC_scaffold_13311	78.8936	0.160099	0.285158	0.5614
7000000486.a:SRS015264_WUGC_scaffold_29242	78.7993	0.871937	1	0.8719
7000000380.a:SRS015663_WUGC_scaffold_40995	78.5835	0.67227	0.821873	0.818
7000000075.a:SRS016056_WUGC_scaffold_1464	78.494	0.997575	1	0.9976
7000000011.a:SRS053214_LANL_scaffold_26325	78.3879	0.662873	0.998122	0.6641
7000000188.a:SRS053398_LANL_scaffold_35462	78.3023	0.765242	0.963913	0.7939
7000000243.a:SRS045004_LANL_scaffold_32934	78.1087	0.336085	0.925136	0.3633
7000000302.a:C2143741	78.0568	0.58515	0.997402	0.5867
7000000191.a:C3068823	78	0.643896	0.930844	0.6917
7000000158.a:SRS014979_WUGC_scaffold_3578	78	0.940403	0.935824	0.9951
7000000559.a:SRS058723_Baylor_scaffold_12987	77.8466	0.321744	0.845112	0.3807
7000000171.a:SRS052697_LANL_scaffold_50385	77.6879	0.713228	0.909494	0.7842
7000000433.a:SRS050752_LANL_scaffold_16318	77.6621	0.306024	0.76172	0.4018
7000000401.a:SRS011271_WUGC_scaffold_34395	77.0171	0.93531	0.994969	0.94
7000000736.a:SRS014235_WUGC_scaffold_61125	77	0.925507	0.982849	0.9417
7000000736.a:SRS014235_WUGC_scaffold_49848	76.853	0.237221	0.540372	0.439
7000000188.a:SRS053398_LANL_scaffold_7252	76.7965	0.917677	1	0.9177
7000000187.a:SRS022609_Baylor_scaffold_6575	76.4557	0.355895	0.699301	0.5089
7000000200.a:C3237021	76.3619	0.419522	0.999981	0.4195
7000000740.a:SRS064276_LANL_scaffold_24763	76.102	0.52964	0.835606	0.6338
7000000429.a:SRS045645_Baylor_scaffold_16353	76.0536	0.561727	0.979399	0.5735
7000000695.a:SRS049900_LANL_scaffold_14509	76	0.422751	0.479347	0.8819
3300003146.a:Ga0051080_1005059	76	0.843337	0.865745	0.9741
7000000460.a:SRS051031_LANL_scaffold_37476	75.9445	0.584282	0.895534	0.6524
7000000475.a:SRS020328_Baylor_scaffold_38629	75.7588	0.190617	0.383838	0.4966
7000000186.a:C1708626	75.7483	0.997911	1	0.9979
7000000262.a:SRS047044_WUGC_scaffold_17024	75.5274	0.820436	0.999033	0.8212
7000000036.a:SRS049164_WUGC_scaffold_4201	75.3303	0.377548	0.827347	0.4563
7000000112.a:SRS011302_Baylor_scaffold_7985	75.2779	0.683869	0.993141	0.6886
7000000069.a:SRS016095_WUGC_scaffold_22686	74.8597	0.140067	0.369111	0.3795
7000000231.a:SRS014613_WUGC_scaffold_7076	74.4689	0.336107	0.980351	0.3428
7000000526.a:SRS019397_WUGC_scaffold_23549	74.4075	0.251322	0.770285	0.3263
7000000370.a:SRS017191_Baylor_scaffold_189	74.32	0.376513	0.615415	0.6118
7000000628.a:SRS015782_WUGC_scaffold_31707	74.3168	0.920638	0.964142	0.9549
7000000006.a:SRS054956_LANL_scaffold_40945	74.2287	0.14928	0.363779	0.4104
7000000526.a:SRS019397_WUGC_scaffold_26364	73.6545	0.52367	0.884311	0.5922
7000000142.a:SRS016753_Baylor_scaffold_781	73.4983	0.426958	0.917955	0.4651
7000000317.a:SRS014459_WUGC_scaffold_20415	73.4187	0.720565	0.979488	0.7357
7000000690.a:SRS055982_Baylor_scaffold_2899	73.364	0.994276	1	0.9943
7000000373.a:SRS016989_Baylor_scaffold_12475	73.3109	0.406407	0.966631	0.4204
7000000736.a:SRS014235_WUGC_scaffold_31575	73.1131	0.620814	0.987021	0.629
7000000633.a:SRS015065_WUGC_scaffold_23878	73.0778	0.571334	0.824717	0.6928
7000000193.a:SRS048870_WUGC_scaffold_38546	72.9942	0.647455	0.955729	0.6774
7000000740.a:SRS064276_LANL_scaffold_64733	72.8623	0.194218	0.2988	0.65
7000000191.a:C3074945	72.7439	0.203531	0.318796	0.6384
7000000526.a:SRS019397_WUGC_scaffold_31504	72.6237	0.640269	0.721914	0.8869
7000000145.a:SRS050422_LANL_scaffold_91555	72.4192	0.393219	0.951913	0.4131
7000000271.a:SRS053335_LANL_scaffold_16345	72.41	0.843043	0.98694	0.8542
7000000490.a:C1877075	72.3563	0.544329	0.906707	0.6003
7000000633.a:SRS015065_WUGC_scaffold_18293	72.2874	0.999276	1	0.9993
7000000372.a:SRS045713_WUGC_scaffold_39160	72.2509	0.437216	0.840027	0.5205
7000000333.a:SRS050925_LANL_scaffold_26464	72.0562	0.548716	0.901592	0.6086
7000000112.a:SRS011302_Baylor_scaffold_18748	72.0445	0.938945	1	0.9389
7000000265.a:C2882465	71.925	0.563044	0.888221	0.6339
7000000370.a:SRS017191_Baylor_scaffold_16298	71.9024	0.505035	0.993789	0.5082
7000000093.a:SRS022137_LANL_scaffold_13705	71.8275	0.929668	1	0.9297
7000000038.a:C4274425	71.2627	0.686344	0.990629	0.6928
7000000736.a:C3555019	71.2017	0.961672	1	0.9617
7000000348.a:SRS017701_Baylor_scaffold_17768	71.0082	0.661543	0.927276	0.7134
7000000271.a:SRS053335_LANL_scaffold_31553	70.977	0.852262	0.961654	0.8862
7000000265.a:C2881545	70.9528	1	1	1
7000000334.a:SRS015217_WUGC_scaffold_36991	70.8922	0.765318	0.83995	0.9111
7000000296.a:C1829446	70.7859	0.879358	0.998928	0.8803
7000000112.a:SRS011302_Baylor_scaffold_24703	70.7642	0.798342	0.999996	0.7983
7000000684.a:SRS019582_WUGC_scaffold_92713	70.6609	0.48959	0.998668	0.4902
3300003146.a:Ga0051080_1006611	70.6535	0.845197	0.967841	0.8733
7000000300.a:SRS043701_LANL_scaffold_31205	70.3212	0.413615	0.81954	0.5047
7000000333.a:SRS050925_LANL_scaffold_34226	70.081	0.51308	0.842006	0.6094
7000000317.a:SRS014459_WUGC_scaffold_95213	69.5936	0.272287	0.849732	0.3204
7000000188.a:SRS053398_LANL_scaffold_30498	69.4063	0.38243	0.830808	0.4603
3300003140.a:Ga0051081_1001618	68.9235	0.49602	0.988608	0.5017
7000000433.a:SRS050752_LANL_scaffold_3157	68.8296	0.403724	0.492091	0.8204
7000000372.a:SRS045713_WUGC_scaffold_39964	68.7359	0.843219	0.948573	0.8889
7000000549.a:SRS013521_LANL_scaffold_18007	68.6069	0.830865	1	0.8309
7000000433.a:SRS050752_LANL_scaffold_20719	68.567	0.51959	0.721151	0.7205
7000000011.a:SRS053214_LANL_scaffold_25621	68.4949	0.233305	0.467668	0.4989
7000000308.a:SRS058770_LANL_scaffold_36820	68.4308	0.666697	0.979807	0.6804
7000000401.a:SRS011271_WUGC_scaffold_1361	68.3097	0.352727	0.842976	0.4184
7000000145.a:SRS050422_LANL_scaffold_87783	68.2754	0.555169	0.861702	0.6443
7000000407.a:SRS019267_WUGC_scaffold_15187	68.1446	0.304728	0.919822	0.3313
7000000538.a:SRS024075_LANL_scaffold_23909	68	0.221763	0.710159	0.3123
7000000736.a:SRS014235_WUGC_scaffold_22059	67.8433	0.93314	0.968969	0.963
7000000401.a:C3191487	67.761	0.865798	1	0.8658
7000000193.a:SRS048870_WUGC_scaffold_5147	67.7503	0.709498	0.999987	0.7095
7000000317.a:SRS014459_WUGC_scaffold_86535	67.6927	0.461939	0.928095	0.4977
7000000332.a:C3518214	67.6245	0.446978	0.968041	0.4617
7000000192.a:C2494558	67.2414	0.534338	0.993822	0.5377
7000000464.a:SRS077730_LANL_scaffold_4134	67.1656	0.251505	0.80371	0.3129
7000000695.a:SRS049900_LANL_scaffold_13946	67.1198	0.664823	0.981543	0.6773
3300003146.a:Ga0051080_1003502	67	0.6314	0.716236	0.8816
7000000531.a:SRS049959_WUGC_scaffold_14146	67	0.570145	0.589201	0.9677
7000000735.a:SRS015190_WUGC_scaffold_1890	66.6595	0.350262	0.999965	0.3503
7000000111.a:SRS019601_WUGC_scaffold_29116	66.3143	0.271904	0.725662	0.3747
7000000158.a:SRS014979_WUGC_scaffold_8813	66.3116	0.378321	0.595933	0.6348
7000000191.a:C3073103	66.2734	0.81037	0.999916	0.8104
7000000022.a:SRS011452_WUGC_scaffold_3680	66.1525	0.999287	1	0.9993
7000000087.a:C2384538	66.0275	0.610989	0.887226	0.6887
7000000429.a:SRS045645_Baylor_scaffold_10640	66	0.163839	0.416982	0.3929
7000000332.a:C3521096	65.998	0.648399	0.744821	0.8705
7000000329.a:SRS016495_LANL_scaffold_3171	65.9786	0.993964	1	0.994
7000000418.a:SRS012273_Baylor_scaffold_34301	65.8767	0.60651	0.868006	0.6987
7000000272.a:C1591845	65.6849	0.896434	0.967501	0.9265
7000000434.a:SRS014287_WUGC_scaffold_14223	65.5492	0.880126	0.999636	0.8804
7000000289.a:SRS024331_LANL_scaffold_30418	65.2088	0.623474	0.792644	0.7866
7000000200.a:SRS023526_Baylor_scaffold_6228	64.7204	0.320491	0.964321	0.3323
7000000302.a:SRS023914_Baylor_scaffold_30281	64.53	0.31639	0.789694	0.4006
7000000397.a:SRS011586_WUGC_scaffold_19136	64.4737	0.859768	1	0.8598
7000000460.a:SRS051031_LANL_scaffold_72468	64.1702	0.776339	0.998444	0.7775
7000000646.a:SRS015960_WUGC_scaffold_30659	64.1628	0.921056	1	0.9211
7000000736.a:SRS014235_WUGC_scaffold_72751	64.1195	0.275996	0.454714	0.607
7000000071.a:SRS065504_LANL_scaffold_38513	64.0702	0.357558	0.786177	0.4548
7000000231.a:SRS014613_WUGC_scaffold_33929	64	0.522788	0.626779	0.8341
7000000492.a:SRS048164_WUGC_scaffold_20878	63.8634	0.433192	0.999991	0.4332
7000000540.a:SRS023346_LANL_scaffold_8664	63.7855	0.404071	0.857465	0.4712
7000000516.a:SRS019161_WUGC_scaffold_67209	63.6727	0.799942	0.848841	0.9424
7000000348.a:SRS017701_Baylor_scaffold_16869	63.3754	0.384714	0.889498	0.4325
7000000081.a:SRS017307_Baylor_scaffold_6587	63.1063	0.575952	0.976146	0.59
7000000484.a:SRS016018_WUGC_scaffold_14315	63.0975	0.346896	0.411233	0.8436
7000000069.a:SRS016095_WUGC_scaffold_36391	63	0.208458	0.493557	0.4224
7000000296.a:SRS024009_Baylor_scaffold_12580	63	0.885011	0.919987	0.962
7000000659.a:C5547216	62.9944	0.454247	0.848393	0.5354
7000000434.a:SRS014287_WUGC_scaffold_38530	62.8929	0.52495	0.964115	0.5445
7000000460.a:SRS051031_LANL_scaffold_67044	62.8682	0.459442	0.936279	0.4907
7000000352.a:SRS014923_WUGC_scaffold_53845	62.8047	0.999247	0.998558	0.9993
7000000348.a:SRS017701_Baylor_scaffold_15014	62.7702	0.386419	0.866224	0.4461
7000000715.a:SRS014683_WUGC_scaffold_51239	62.7467	0.499759	0.92718	0.539
7000000100.a:SRS018817_WUGC_scaffold_26494	62.7144	0.395813	0.763786	0.5182
7000000232.a:SRS015578_WUGC_scaffold_49577	62.5988	0.63818	0.919333	0.6942
7000000272.a:SRS016203_WUGC_scaffold_8803	62.2581	0.880148	0.999993	0.8802
7000000736.a:SRS014235_WUGC_scaffold_72295	61.883	0.30637	0.904379	0.3388
7000000352.a:SRS014923_WUGC_scaffold_58690	61.8667	0.423202	0.978545	0.4325
7000000632.a:SRS050299_LANL_scaffold_8422	61.7937	0.356841	0.638335	0.559
7000000308.a:SRS058770_LANL_scaffold_31292	61.4889	0.256963	0.485013	0.5298
7000000526.a:SRS019397_WUGC_scaffold_25998	61.479	0.534905	0.849923	0.6294
7000000071.a:SRS065504_LANL_scaffold_51345	61.4205	0.399002	0.828485	0.4816
7000000145.a:SRS050422_LANL_scaffold_93314	60.9579	0.344296	0.530494	0.649
7000000112.a:SRS011302_Baylor_scaffold_14176	60.6262	0.541145	0.937472	0.5772
7000000475.a:SRS020328_Baylor_scaffold_9767	60.4148	0.249041	0.554059	0.4495
7000000633.a:SRS015065_WUGC_scaffold_8912	60.4115	0.576259	0.975044	0.591
7000000429.a:C2069547	60.1265	0.872142	0.944124	0.9238
7000000112.a:SRS011302_Baylor_scaffold_6142	60.0383	0.998961	0.999999	0.999
7000000317.a:SRS014459_WUGC_scaffold_44455	60.0362	0.999901	1	0.9999
7000000380.a:SRS015663_WUGC_scaffold_25358	60	0.274367	0.707647	0.3877
7000000317.a:C2700717	59.9822	0.792344	0.999754	0.7925
7000000032.a:C3922436	59.9744	0.567727	0.937221	0.6058
7000000188.a:SRS053398_LANL_scaffold_7277	59.8862	0.591714	0.789995	0.749
7000000385.a:SRS017433_Baylor_scaffold_5006	59.8836	0.542568	0.999995	0.5426
7000000071.a:C3429697	59.871	0.755384	0.999999	0.7554
7000000081.a:C2526777	59.6313	0.33228	0.793329	0.4188
7000000107.a:SRS042628_WUGC_scaffold_21673	59.4912	0.134594	0.412629	0.3262
7000000425.a:C3134482	59.4458	0.882107	1	0.8821
7000000032.a:SRS024132_Baylor_scaffold_36807	59.4458	0.882107	1	0.8821
7000000417.a:SRS011239_Baylor_scaffold_29095	59.2739	1	1	1
7000000071.a:SRS065504_LANL_scaffold_45106	58.9241	0.594454	0.990475	0.6002
7000000317.a:SRS014459_WUGC_scaffold_95475	58.7422	0.402549	0.86327	0.4663
7000000184.a:SRS016954_Baylor_scaffold_31634	58.4014	0.542972	0.998734	0.5437
7000000429.a:C2068191	58.3054	0.603901	0.992114	0.6087
7000000243.a:SRS045004_LANL_scaffold_34514	58.2049	0.259291	0.745604	0.3478
7000000232.a:SRS015578_WUGC_scaffold_48783	58.0715	0.216334	0.395982	0.5463
7000000498.a:SRS017521_Baylor_scaffold_17378	58	0.360019	0.623907	0.577
7000000516.a:SRS019161_WUGC_scaffold_33698	57.5577	0.265419	0.560969	0.4731
7000000333.a:SRS050925_LANL_scaffold_12390	57.4069	0.834795	0.999998	0.8348
7000000098.a:SRS023176_Baylor_scaffold_1716	57.299	0.403909	0.992286	0.407
7000000441.a:SRS015794_Baylor_scaffold_17960	57.2783	0.196638	0.464001	0.4238
7000000712.a:SRS057478_LANL_scaffold_1961	57.1727	0.274363	0.3641	0.7535
7000000628.a:SRS015782_WUGC_scaffold_22286	57.1632	0.921483	0.939559	0.9808
7000000032.a:SRS024132_Baylor_scaffold_39159	57	0.148319	0.233747	0.6345
7000000192.a:SRS017821_Baylor_scaffold_25048	56.9363	0.786503	0.996612	0.7892
7000000329.a:SRS016495_LANL_scaffold_2726	56.7185	0.993972	1	0.994
7000000526.a:SRS019397_WUGC_scaffold_18813	56.7162	1	1	1
7000000071.a:SRS065504_LANL_scaffold_35310	56.69	0.797589	0.991685	0.8043
7000000087.a:C2385170	56.4742	0.515712	0.994429	0.5186
7000000296.a:C1830682	56.3743	0.266335	0.539223	0.4939
7000000333.a:SRS050925_LANL_scaffold_26956	56.3382	0.438149	0.591817	0.7403
7000000434.a:SRS014287_WUGC_scaffold_25417	56.1654	0.987554	1	0.9876
7000000429.a:C2072217	56	0.468312	0.541703	0.8645
7000000243.a:SRS045004_LANL_scaffold_30107	55.9863	0.324515	0.913295	0.3553
7000000069.a:SRS016095_WUGC_scaffold_10870	55.7348	0.841235	0.948933	0.8865
7000000332.a:SRS015133_WUGC_scaffold_43023	55.5495	0.592567	0.773104	0.7665
7000000475.a:SRS020328_Baylor_scaffold_22653	55.5395	0.440353	0.9189	0.4792
7000000262.a:SRS047044_WUGC_scaffold_22240	55.4907	0.684901	1	0.6849
7000000145.a:SRS050422_LANL_scaffold_79493	55.4728	0.467849	0.951936	0.4915
7000000300.a:SRS043701_LANL_scaffold_26382	55.4431	0.311571	0.441435	0.7058
7000000032.a:SRS024132_Baylor_scaffold_12332	55.4188	0.419855	0.93477	0.4492
7000000172.a:SRS020869_Baylor_scaffold_8760	55.2907	0.478969	0.795641	0.602
7000000158.a:SRS014979_WUGC_scaffold_18572	55.2257	0.821412	0.993384	0.8269
7000000401.a:SRS011271_WUGC_scaffold_38918	55.2047	0.310835	0.968034	0.3211
7000000272.a:C1593687	55.1954	0.475861	0.974806	0.4882
7000000081.a:SRS017307_Baylor_scaffold_32312	55.0265	0.397556	0.944052	0.4211
7000000075.a:C1204123	55	0.556903	0.620372	0.8977
3300003155.a:Ga0052270_10012109	55	0.630902	0.654927	0.9633
7000000380.a:C3132616	55	0.58092	0.601435	0.9659
7000000200.a:SRS023526_Baylor_scaffold_29697	54.6453	0.340736	0.656688	0.5189
7000000633.a:SRS015065_WUGC_scaffold_42101	54.5683	0.612729	0.926964	0.661
7000000628.a:SRS015782_WUGC_scaffold_4156	54.5493	0.281441	0.667724	0.4215
7000000712.a:SRS057478_LANL_scaffold_27827	54.3369	0.285274	0.820484	0.3477
7000000142.a:SRS016753_Baylor_scaffold_15524	54.314	0.318602	0.694095	0.459
7000000188.a:SRS053398_LANL_scaffold_20168	54.2375	0.996316	1	0.9963
7000000669.a:SRS022713_LANL_scaffold_23529	54.2103	0.801146	0.904133	0.8861
7000000191.a:C3073331	54.1233	0.681849	0.914971	0.7452
7000000538.a:SRS024075_LANL_scaffold_15318	53.7074	0.99663	1	0.9966
7000000174.a:C7614557	53.4519	0.441005	0.741129	0.595
7000000659.a:SRS015854_WUGC_scaffold_37801	53.3205	1	1	1
7000000484.a:SRS016018_WUGC_scaffold_16442	53.2268	0.185396	0.424638	0.4366
7000000075.a:SRS016056_WUGC_scaffold_12547	53.2265	0.975976	1	0.976
7000000460.a:SRS051031_LANL_scaffold_50634	53.1108	1	1	1
7000000184.a:SRS016954_Baylor_scaffold_10268	53.0197	0.999676	1	0.9997
7000000740.a:SRS064276_LANL_scaffold_18823	53	0.62532	0.779012	0.8027
7000000111.a:SRS019601_WUGC_scaffold_6864	52.9111	0.332281	0.598326	0.5554
7000000641.a:SRS018351_Baylor_scaffold_7961	52.8421	0.470864	0.836975	0.5626
7000000093.a:SRS022137_LANL_scaffold_19454	52.778	0.706382	1	0.7064
7000000172.a:SRS020869_Baylor_scaffold_7251	52.6446	0.745159	0.996005	0.7481
7000000239.a:SRS013951_WUGC_scaffold_14463	52.459	0.929553	1	0.9296
7000000352.a:SRS014923_WUGC_scaffold_58879	52.4336	0.400282	0.914918	0.4375
7000000429.a:C2068041	52.3482	0.993484	0.999984	0.9935
7000000231.a:SRS014613_WUGC_scaffold_27073	52.0673	0.262404	0.614683	0.4269
7000000464.a:SRS077730_LANL_scaffold_21724	51.8785	0.356221	0.508278	0.7008
7000000626.a:SRS064557_LANL_scaffold_21019	51.229	0.498281	0.639231	0.7795
7000000057.a:SRS013818_Baylor_scaffold_11447	51.0409	0.19063	0.258615	0.7371
7000000735.a:SRS015190_WUGC_scaffold_30028	51	0.101923	0.268867	0.3791
3300003155.a:Ga0052270_10304922	51	0.364539	0.543739	0.6704
7000000498.a:SRS017521_Baylor_scaffold_10410	51	0.24299	0.468203	0.519
7000000262.a:SRS047044_WUGC_scaffold_27986	50.9846	0.410859	0.804244	0.5109
7000000188.a:SRS053398_LANL_scaffold_10740	50.8515	0.6571	0.984387	0.6675
7000000373.a:SRS016989_Baylor_scaffold_1176	50.5645	0.921282	1	0.9213
7000000444.a:SRS063985_LANL_scaffold_11584	50.3485	0.319327	0.403412	0.7916
7000000633.a:SRS015065_WUGC_scaffold_41496	50.174	0.358918	0.653345	0.5494
7000000302.a:SRS023914_Baylor_scaffold_33737	50.0514	0.484472	0.905166	0.5352
7000000145.a:SRS050422_LANL_scaffold_89999	50	0.189636	0.51519	0.3681
7000000434.a:C2012148	50	0.71826	0.800483	0.8973
7000000069.a:SRS016095_WUGC_scaffold_37270	49.9449	0.798573	0.947065	0.8432
7000000429.a:C2070721	49.8946	0.999301	0.999998	0.9993
7000000630.a:SRS062427_LANL_scaffold_13141	49.6308	0.236801	0.729947	0.3244
7000000641.a:SRS018351_Baylor_scaffold_31785	49.5047	0.368811	0.437353	0.8433
7000000071.a:SRS065504_LANL_scaffold_1809	49.3049	0.322367	0.549555	0.5866
7000000302.a:SRS023914_Baylor_scaffold_33088	49.1687	0.711727	0.893526	0.7965
7000000296.a:C1829136	49	0.759863	0.803748	0.9454
7000000334.a:SRS015217_WUGC_scaffold_29141	48.9712	0.585588	0.81095	0.7221
7000000232.a:SRS015578_WUGC_scaffold_33345	48.8955	0.325124	0.8735	0.3722
7000000111.a:SRS019601_WUGC_scaffold_2156	48.6626	0.611232	0.891455	0.6857
7000000352.a:C3382929	48.6602	0.980244	1	0.9802
7000000200.a:SRS023526_Baylor_scaffold_19095	48.5863	0.901538	0.991048	0.9097
7000000444.a:SRS063985_LANL_scaffold_18122	48.4372	0.19042	0.335181	0.5681
7000000158.a:SRS014979_WUGC_scaffold_34729	48.2989	0.297781	0.902553	0.3299
7000000112.a:SRS011302_Baylor_scaffold_7798	48.2858	0.591901	0.992603	0.5963
7000000262.a:SRS047044_WUGC_scaffold_10544	48.1138	0.562881	0.837346	0.6722
7000000271.a:SRS053335_LANL_scaffold_2330	48.0328	0.692201	0.992904	0.6971
7000000098.a:SRS023176_Baylor_scaffold_14121	48	0.16541	0.345493	0.4788
7000000271.a:SRS053335_LANL_scaffold_8632	47.7401	0.816324	0.99946	0.8168
7000000022.a:SRS011452_WUGC_scaffold_2829	47.6504	1	1	1
7000000498.a:SRS017521_Baylor_scaffold_41320	47.5802	0.32346	0.865965	0.3735
7000000243.a:SRS045004_LANL_scaffold_14976	47.484	0.283041	0.875312	0.3234
7000000038.a:C4272040	47.4827	0.726003	0.881804	0.8233
7000000100.a:SRS018817_WUGC_scaffold_11631	47.3625	0.769334	1	0.7693
7000000111.a:SRS019601_WUGC_scaffold_6393	47.3614	0.476658	0.998556	0.4773
7000000069.a:SRS016095_WUGC_scaffold_9023	47.288	0.413177	0.835346	0.4946
7000000549.a:SRS013521_LANL_scaffold_13900	47.2092	0.985796	1	0.9858
7000000628.a:SRS015782_WUGC_scaffold_29404	47.0521	0.438937	0.967433	0.4537
7000000145.a:SRS050422_LANL_scaffold_91706	47.0498	0.497871	0.886134	0.5618
7000000334.a:SRS015217_WUGC_scaffold_23239	46.9984	0.900903	1	0.9009
7000000570.a:SRS051882_Baylor_scaffold_24486	46.9437	0.55408	0.561031	0.9876
7000000158.a:C3313952	46.8638	0.994929	1	0.9949
7000000570.a:SRS051882_Baylor_scaffold_24810	46.7795	0.750017	0.989935	0.7576
7000000434.a:SRS014287_WUGC_scaffold_24156	46.7731	0.74235	0.990153	0.7497
7000000526.a:SRS019397_WUGC_scaffold_17560	46.6568	0.967295	0.999964	0.9673
7000000191.a:C3073934	46.551	0.532653	0.970056	0.5491
7000000646.a:SRS015960_WUGC_scaffold_18811	46.0642	0.471719	0.989639	0.4767
7000000526.a:SRS019397_WUGC_scaffold_30191	45.9202	0.554322	0.908508	0.6101
7000000516.a:SRS019161_WUGC_scaffold_62502	45.8246	0.539181	0.940698	0.5732
7000000087.a:C2384524	45.8243	0.438227	0.878537	0.4988
7000000289.a:SRS024331_LANL_scaffold_43108	45.6936	0.422455	0.72198	0.5851
7000000401.a:C3191677	45.6231	0.664993	0.987696	0.6733
7000000200.a:SRS023526_Baylor_scaffold_34564	45.4589	0.665946	0.915837	0.7271
7000000178.a:SRS017247_LANL_scaffold_9725	45.448	0.26749	0.78262	0.3418
7000000302.a:SRS023914_Baylor_scaffold_23746	45.4399	0.550861	0.996923	0.5526
7000000332.a:SRS015133_WUGC_scaffold_34758	45.1558	0.978349	0.99998	0.9784
7000000296.a:SRS024009_Baylor_scaffold_5004	45.1409	0.268193	0.849611	0.3157
7000000231.a:SRS014613_WUGC_scaffold_2800	44.9213	0.512282	0.997618	0.5135
7000000213.a:C3691715	44.9038	0.758983	0.87051	0.8719
7000000543.a:SRS024265_LANL_scaffold_16167	44.7749	0.964451	0.999812	0.9646
7000000093.a:SRS022137_LANL_scaffold_941	44.2494	0.443486	0.926855	0.4785
7000000317.a:SRS014459_WUGC_scaffold_94517	44.0974	0.241039	0.7223	0.3337
7000000715.a:SRS014683_WUGC_scaffold_32086	44.0584	0.103438	0.263993	0.3918
7000000736.a:SRS014235_WUGC_scaffold_73395	43.9674	0.473412	0.54944	0.8616
7000000526.a:SRS019397_WUGC_scaffold_31262	43.9035	0.659124	0.995366	0.6622
7000000531.a:SRS049959_WUGC_scaffold_58889	43.7568	0.698217	0.909183	0.768
7000000071.a:SRS065504_LANL_scaffold_56682	43.6618	0.82191	0.851483	0.9653
7000000410.a:SRS019030_Baylor_scaffold_15832	43.5895	0.999257	1	0.9993
7000000370.a:SRS017191_Baylor_scaffold_10469	43.4036	0.99955	1	0.9995
7000000684.a:SRS019582_WUGC_scaffold_57153	43.385	0.212355	0.416868	0.5094
7000000373.a:SRS016989_Baylor_scaffold_21698	43.3399	0.279885	0.576648	0.4854
7000000429.a:C2071375	43.3025	0.418459	0.703658	0.5947
7000000187.a:SRS022609_Baylor_scaffold_41591	43.2722	0.662268	0.935416	0.708
7000000410.a:SRS019030_Baylor_scaffold_25174	43.2217	0.763546	0.889505	0.8584
7000000333.a:SRS050925_LANL_scaffold_4572	43.0176	0.696751	1	0.6968
7000000531.a:C3985590	43	0.819616	0.826885	0.9912
7000000624.a:SRS024435_LANL_scaffold_19729	42.7347	0.10532	0.349374	0.3015
7000000306.a:SRS043001_WUGC_scaffold_44869	42.4552	0.777942	0.96511	0.8061
7000000107.a:SRS042628_WUGC_scaffold_29665	42.4136	0.937748	0.997889	0.9397
7000000296.a:C1830654	42.4021	0.704631	0.999984	0.7046
7000000258.a:SRS016335_WUGC_scaffold_44376	42.3808	0.980831	0.997728	0.9831
7000000006.a:SRS054956_LANL_scaffold_39049	42.2617	0.9515	0.998444	0.953
7000000498.a:SRS017521_Baylor_scaffold_6217	42.08	0.501332	0.685106	0.7318
7000000736.a:SRS014235_WUGC_scaffold_60259	42.0423	0.371511	0.517993	0.7172
7000000296.a:C1830286	42	0.31003	0.503677	0.6155
7000000231.a:SRS014613_WUGC_scaffold_22821	41.99	0.501544	0.90387	0.5549
7000000171.a:SRS052697_LANL_scaffold_39458	41.9135	0.157912	0.386938	0.4081
7000000213.a:C3690787	41.8702	0.222728	0.740591	0.3007
7000000045.a:C2659494	41.8262	0.750884	0.999998	0.7509
7000000715.a:SRS014683_WUGC_scaffold_8600	41.6761	0.999803	1	0.9998
7000000526.a:SRS019397_WUGC_scaffold_26363	41.6665	0.504701	0.78005	0.647
7000000171.a:SRS052697_LANL_scaffold_66992	41.6645	0.171792	0.446226	0.385
7000000045.a:SRS013687_Baylor_scaffold_46555	41.5801	0.606634	0.964997	0.6286
7000000317.a:SRS014459_WUGC_scaffold_60608	41.5758	0.320859	0.570398	0.5625
7000000455.a:C5191864	41.2846	0.811331	0.923459	0.8786
7000000252.a:C2206190	41.2621	0.471996	0.922911	0.5114
7000000045.a:SRS013687_Baylor_scaffold_40450	41.1385	0.319885	0.868751	0.3682
7000000302.a:SRS023914_Baylor_scaffold_16486	40.9904	0.293856	0.925721	0.3174
7000000289.a:SRS024331_LANL_scaffold_48156	40.9088	0.333268	0.819255	0.4068
7000000193.a:SRS048870_WUGC_scaffold_50634	40.8429	0.274804	0.638789	0.4302
7000000433.a:SRS050752_LANL_scaffold_32075	40.8413	0.381512	0.736509	0.518
7000000186.a:SRS022524_Baylor_scaffold_74229	40.7506	0.998422	1	0.9984
7000000087.a:C2383728	40.2317	0.329127	0.802265	0.4102
7000000736.a:SRS014235_WUGC_scaffold_34968	40.1752	0.181131	0.241915	0.7487
7000000265.a:C2881719	39.9642	0.722083	0.998982	0.7228
7000000646.a:SRS015960_WUGC_scaffold_7166	39.777	0.397438	0.809504	0.491
7000000232.a:SRS015578_WUGC_scaffold_51426	39.7422	0.233284	0.679614	0.3433
7000000736.a:SRS014235_WUGC_scaffold_20870	39.6437	0.291367	0.630596	0.4621
7000000081.a:SRS017307_Baylor_scaffold_33480	39.5808	0.37127	0.784648	0.4732
7000000111.a:SRS019601_WUGC_scaffold_48233	39.3524	0.22325	0.583686	0.3825
3300003140.a:Ga0051081_1002146	39.0756	0.760944	0.999365	0.7614
7000000142.a:SRS016753_Baylor_scaffold_16227	39.0458	0.965531	1	0.9655
2032320001.a:PCEOT_contig05514	39	0.556049	0.716665	0.7759
7000000582.a:SRS019787_WUGC_scaffold_7978	38.8091	0.316266	1	0.3163
7000000609.a:SRS056519_LANL_scaffold_36250	38.807	0.146937	0.429574	0.3421
7000000036.a:C2521426	38.7555	0.284535	0.902114	0.3154
7000000486.a:SRS015264_WUGC_scaffold_13179	38.7395	0.649388	0.991535	0.6549
7000000695.a:SRS049900_LANL_scaffold_17222	38.7309	0.455255	0.939849	0.4844
7000000633.a:SRS015065_WUGC_scaffold_39366	38.7093	0.57117	0.997555	0.5726
3300003155.a:Ga0052270_10011341	38.6657	0.695593	0.94637	0.735
7000000633.a:SRS015065_WUGC_scaffold_34200	38.6564	0.279354	0.569221	0.4908
7000000417.a:SRS011239_Baylor_scaffold_4488	38.248	0.970343	1	0.9703
7000000022.a:SRS011452_WUGC_scaffold_3183	38.1931	0.974203	1	0.9742
7000000246.a:SRS078176_LANL_scaffold_28310	38.0768	0.409705	0.738442	0.5548
7000000334.a:SRS015217_WUGC_scaffold_14508	38.0598	0.610482	1	0.6105
7000000200.a:SRS023526_Baylor_scaffold_29673	37.9984	0.686774	0.945466	0.7264
7000000736.a:SRS014235_WUGC_scaffold_70041	37.907	0.421854	0.547245	0.7709
7000000521.a:SRS023583_Baylor_scaffold_5334	37.8588	0.966689	1	0.9667
7000000444.a:SRS063985_LANL_scaffold_25379	37.7608	0.385235	0.857554	0.4492
7000000158.a:SRS014979_WUGC_scaffold_34530	37.4808	0.828022	0.897879	0.9222
7000000418.a:C3800405	37.4481	0.435992	0.474244	0.9193
7000000011.a:SRS053214_LANL_scaffold_7507	37.3256	0.614485	0.934752	0.6574
7000000735.a:SRS015190_WUGC_scaffold_27270	37.2029	0.498339	0.931947	0.5347
7000000715.a:SRS014683_WUGC_scaffold_25597	37.123	0.379596	0.843013	0.4503
7000000262.a:SRS047044_WUGC_scaffold_28544	37.0867	0.186313	0.443889	0.4197
3300003146.a:Ga0051080_1003233	37	0.742516	0.794209	0.9349
7000000484.a:C1316717	37	0.295874	0.41856	0.7069
7000000289.a:SRS024331_LANL_scaffold_18524	36.9953	0.985802	0.999819	0.986
7000000107.a:SRS042628_WUGC_scaffold_22652	36.9612	0.248261	0.523068	0.4746
7000000297.a:SRS056259_LANL_scaffold_7242	36.8187	0.401342	0.999367	0.4016
7000000684.a:SRS019582_WUGC_scaffold_84423	36.6963	0.24229	0.569679	0.4253
7000000425.a:SRS013476_Baylor_scaffold_3041	36.6778	0.190166	0.611103	0.3112
7000000262.a:SRS047044_WUGC_scaffold_28283	36.4557	0.377889	0.749346	0.5043
7000000087.a:C2384940	36.2955	0.664732	1	0.6647
7000000669.a:SRS022713_LANL_scaffold_27054	36	0.139862	0.348878	0.4009
7000000006.a:SRS054956_LANL_scaffold_44086	36	0.205099	0.566595	0.362
7000000111.a:SRS019601_WUGC_scaffold_48652	35.9037	0.92843	0.963972	0.9631
7000000265.a:C2882667	35.8024	0.238789	0.594011	0.402
7000000187.a:SRS022609_Baylor_scaffold_57879	35.6765	0.129933	0.429007	0.3029
7000000417.a:SRS011239_Baylor_scaffold_29039	35.6432	0.582384	0.681201	0.8549
7000000690.a:SRS055982_Baylor_scaffold_12018	35.63	0.494646	0.925269	0.5346
7000000171.a:SRS052697_LANL_scaffold_74265	35.5892	0.639613	0.974116	0.6566
7000000071.a:SRS065504_LANL_scaffold_57310	35.5538	0.805895	0.830628	0.9702
7000000655.a:SRS019968_Baylor_scaffold_873	35.5122	0.656893	0.999947	0.6569
7000000401.a:SRS011271_WUGC_scaffold_832	35.4348	0.838902	0.999689	0.8392
7000000516.a:C2641989	35.4092	0.570435	0.875625	0.6515
7000000191.a:C3074821	35.3133	0.221554	0.459607	0.482
7000000397.a:SRS011586_WUGC_scaffold_935	35.302	0.970586	1	0.9706
7000000040.a:SRS043411_WUGC_scaffold_17443	35.2368	0.97606	1	0.9761
7000000094.a:SRS024549_LANL_scaffold_4916	35.159	0.707609	0.999954	0.7076
7000000038.a:C4276709	35.1152	0.357878	0.865498	0.4135
7000000740.a:SRS064276_LANL_scaffold_59704	34.9995	0.172476	0.450697	0.3827
7000000433.a:SRS050752_LANL_scaffold_32600	34.7248	0.742931	0.926039	0.8023
7000000531.a:C3986072	34.7093	0.479118	0.703072	0.6815
7000000296.a:SRS024009_Baylor_scaffold_6249	34.3508	0.375843	0.919457	0.4088
7000000690.a:SRS055982_Baylor_scaffold_16374	34.248	0.850822	0.999402	0.8513
7000000559.a:SRS058723_Baylor_scaffold_10212	34.2316	0.332344	0.879445	0.3779
7000000410.a:SRS019030_Baylor_scaffold_7199	34	0.152046	0.488213	0.3114
7000000715.a:SRS014683_WUGC_scaffold_8200	33.7962	0.816119	1	0.8161
7000000181.a:C1765908	33.6512	0.29648	0.740123	0.4006
7000000239.a:SRS013951_WUGC_scaffold_21099	33.6429	0.430657	0.80858	0.5326
7000000053.a:SRS013215_Baylor_scaffold_5549	33.5359	0.701476	0.999881	0.7016
7000000712.a:SRS057478_LANL_scaffold_14149	33.4052	0.786644	0.990338	0.7943
7000000418.a:SRS012273_Baylor_scaffold_8590	33.2036	0.531314	0.827009	0.6425
7000000538.a:SRS024075_LANL_scaffold_6803	33.1832	0.549269	0.981775	0.5595
7000000526.a:SRS019397_WUGC_scaffold_31753	33.0184	0.324196	0.667156	0.4859
7000000011.a:SRS053214_LANL_scaffold_9915	32.969	0.301341	0.589324	0.5113
7000000429.a:C2069677	32.8365	0.425294	0.858311	0.4955
7000000661.a:SRS052027_LANL_scaffold_64	32.8061	0.999466	1	0.9995
7000000736.a:SRS014235_WUGC_scaffold_53927	32.6708	0.196511	0.330973	0.5937
7000000695.a:SRS049900_LANL_scaffold_2587	32.6434	0.353118	0.610948	0.578
7000000715.a:SRS014683_WUGC_scaffold_14693	32.6359	0.208164	0.520395	0.4
7000000570.a:SRS051882_Baylor_scaffold_2043	32.5792	0.462761	0.61349	0.7543
7000000385.a:SRS017433_Baylor_scaffold_1813	32.4075	0.261605	0.521398	0.5017
7000000475.a:SRS020328_Baylor_scaffold_1745	32.3868	0.752782	0.999493	0.7532
7000000081.a:SRS017307_Baylor_scaffold_32950	32.2403	0.260808	0.644343	0.4048
7000000317.a:SRS014459_WUGC_scaffold_84421	32.1646	0.611724	0.926852	0.66
7000000112.a:SRS011302_Baylor_scaffold_24263	32.1626	0.331285	0.643884	0.5145
7000000296.a:C1827385	32.1549	0.459093	0.834196	0.5503
7000000735.a:SRS015190_WUGC_scaffold_13284	32.0742	0.490927	0.79987	0.6138
7000000232.a:SRS015578_WUGC_scaffold_14706	32.0703	0.340375	0.474104	0.7179
7000000526.a:SRS019397_WUGC_scaffold_13411	32.0142	0.410898	0.90934	0.4519
7000000145.a:SRS050422_LANL_scaffold_71829	31.9427	0.370968	0.477673	0.7766
7000000243.a:SRS045004_LANL_scaffold_20991	31.9098	0.998692	1	0.9987
7000000546.a:SRS019910_WUGC_scaffold_64065	31.8613	0.161743	0.413132	0.3915
7000000272.a:C1593137	31.7132	0.376986	0.937593	0.4021
7000000112.a:SRS011302_Baylor_scaffold_7808	31.6987	0.97334	1	0.9733
7000000317.a:SRS014459_WUGC_scaffold_33841	31.6856	0.998695	1	0.9987
7000000131.a:SRS057717_LANL_scaffold_2749	31.5925	0.659963	0.9998	0.6601
7000000081.a:SRS017307_Baylor_scaffold_27277	31.5924	0.999785	1	0.9998
7000000239.a:SRS013951_WUGC_scaffold_68045	31.5618	0.260001	0.301842	0.8614
7000000192.a:SRS017821_Baylor_scaffold_11510	31.5372	0.9889	1	0.9889
7000000740.a:SRS064276_LANL_scaffold_70789	31.5274	0.142554	0.473048	0.3014
7000000302.a:SRS023914_Baylor_scaffold_33790	31.4866	0.780786	0.985591	0.7922
7000000297.a:SRS056259_LANL_scaffold_54948	31.3386	0.428433	0.900136	0.476
7000000370.a:SRS017191_Baylor_scaffold_9720	31.323	0.397216	0.515635	0.7703
7000000579.a:SRS017103_Baylor_scaffold_2643	31.1495	0.582886	0.858978	0.6786
7000000045.a:SRS013687_Baylor_scaffold_54183	31.0079	0.453706	0.970263	0.4676
7000000302.a:SRS023914_Baylor_scaffold_27312	31.0079	0.453706	0.970263	0.4676
7000000475.a:SRS020328_Baylor_scaffold_20012	31	0.165892	0.256677	0.6463
7000000380.a:SRS015663_WUGC_scaffold_38268	31	0.442126	0.439609	0.9943
7000000302.a:SRS023914_Baylor_scaffold_28096	30.919	0.951864	0.980556	0.9707
7000000460.a:SRS051031_LANL_scaffold_21043	30.9112	0.154903	0.274904	0.5635
7000000531.a:C3986182	30.8826	0.827907	0.972334	0.8515
7000000081.a:SRS017307_Baylor_scaffold_32578	30.8695	0.673214	0.844927	0.7968
7000000332.a:SRS015133_WUGC_scaffold_23394	30.86	0.160415	0.451378	0.3554
7000000401.a:SRS011271_WUGC_scaffold_5567	30.8056	0.444137	0.759803	0.5845
7000000684.a:SRS019582_WUGC_scaffold_55899	30.761	0.736707	0.997769	0.7384
7000000032.a:SRS024132_Baylor_scaffold_31646	30.686	0.579301	0.86291	0.6713
7000000172.a:C3443772	30.6839	0.832195	0.940119	0.8852
7000000609.a:SRS056519_LANL_scaffold_7009	30.6753	0.199024	0.425548	0.4677
3300003140.a:Ga0051081_1006518	30.5316	0.437286	0.578938	0.7553
7000000401.a:C3194985	30.4595	0.143838	0.388978	0.3698
7000000111.a:SRS019601_WUGC_scaffold_39244	30.2205	0.881559	0.909519	0.9693
7000000111.a:SRS019601_WUGC_scaffold_48716	30.0092	0.808542	0.999999	0.8085
3300003122.a:Ga0052257_118548	30	0.132573	0.267319	0.4959
7000000641.a:SRS018351_Baylor_scaffold_29898	30	0.186256	0.498131	0.3739
7000000492.a:SRS048164_WUGC_scaffold_12104	29.9642	0.429149	0.767682	0.559
7000000262.a:SRS047044_WUGC_scaffold_30089	29.9278	0.945443	0.971095	0.9736
7000000232.a:SRS015578_WUGC_scaffold_35829	29.8684	0.196228	0.378795	0.518
7000000265.a:C2882543	29.8386	0.715255	0.897854	0.7966
7000000200.a:SRS023526_Baylor_scaffold_32654	29.7862	0.57151	0.999966	0.5715
7000000401.a:SRS011271_WUGC_scaffold_34346	29.7862	0.57151	0.999966	0.5715
7000000433.a:SRS050752_LANL_scaffold_50824	29.7565	0.509817	0.772885	0.6596
7000000492.a:SRS048164_WUGC_scaffold_9867	29.7482	0.500695	0.787394	0.6359
7000000006.a:SRS054956_LANL_scaffold_30248	29.6476	0.253696	0.561536	0.4518
7000000516.a:C2640542	29.4808	0.365635	0.657897	0.5558
7000000308.a:SRS058770_LANL_scaffold_4463	29.3847	0.989102	1	0.9891
7000000418.a:C3800309	29.2979	0.310817	0.56534	0.5498
7000000077.a:C470268	29.2028	0.715066	0.948672	0.7538
7000000158.a:SRS014979_WUGC_scaffold_10211	29.1508	1	1	1
7000000570.a:SRS051882_Baylor_scaffold_1184	29.0306	0.10955	0.155293	0.7054
7000000231.a:SRS014613_WUGC_scaffold_3983	29	0.104858	0.2147	0.4884
7000000380.a:SRS015663_WUGC_scaffold_46672	29	0.587738	0.616232	0.9538
7000000444.a:SRS063985_LANL_scaffold_45067	28.914	0.997893	1	0.9979
7000000587.a:C751179	28.9039	0.154544	0.489905	0.3155
7000000045.a:SRS013687_Baylor_scaffold_20620	28.8942	0.255653	0.356352	0.7174
7000000333.a:SRS050925_LANL_scaffold_8294	28.7229	0.13408	0.271477	0.4939
7000000433.a:SRS050752_LANL_scaffold_24340	28.6938	0.405154	0.918949	0.4409
7000000444.a:SRS063985_LANL_scaffold_57029	28.6906	0.361336	0.493068	0.7328
7000000296.a:SRS024009_Baylor_scaffold_686	28.5933	0.811986	0.999998	0.812
7000000380.a:SRS015663_WUGC_scaffold_3007	28.5607	0.23442	0.665194	0.3524
7000000659.a:C5547346	28.5298	0.436009	0.958002	0.4551
7000000531.a:SRS049959_WUGC_scaffold_27524	28.4065	0.48318	0.835113	0.5786
7000000532.a:SRS011529_WUGC_scaffold_13060	28.3845	0.984084	0.999973	0.9841
7000000193.a:SRS048870_WUGC_scaffold_15106	28.2929	0.353277	0.637887	0.5538
7000000200.a:SRS023526_Baylor_scaffold_17349	28.2573	0.891685	1	0.8917
7000000300.a:C1857542	28.223	0.374355	0.654426	0.572
7000000297.a:SRS056259_LANL_scaffold_28519	28.2114	0.534118	0.602024	0.8872
7000000158.a:C3312165	28	0.264485	0.580294	0.4558
7000000655.a:SRS019968_Baylor_scaffold_26247	28	0.202259	0.465732	0.4343
7000000401.a:SRS011271_WUGC_scaffold_22165	27.8418	1	1	1
7000000372.a:SRS045713_WUGC_scaffold_8679	27.8081	0.626542	0.999949	0.6266
7000000333.a:SRS050925_LANL_scaffold_62226	27.7884	0.490964	0.823412	0.5963
7000000045.a:SRS013687_Baylor_scaffold_59604	27.7734	0.896988	0.926318	0.9683
7000000239.a:SRS013951_WUGC_scaffold_8981	27.7726	0.342467	0.811745	0.4219
7000000172.a:SRS020869_Baylor_scaffold_20162	27.7197	0.599186	0.844722	0.7093
7000000308.a:SRS058770_LANL_scaffold_3823	27.6219	0.55144	0.988965	0.5576
7000000397.a:SRS011586_WUGC_scaffold_14006	27.6197	0.815172	0.903971	0.9018
7000000087.a:C2384208	27.5631	0.337056	0.6014	0.5605
7000000492.a:SRS048164_WUGC_scaffold_42030	27.5126	0.611542	0.966735	0.6326
7000000081.a:C2526575	27.431	0.511312	0.996807	0.513
7000000100.a:SRS018817_WUGC_scaffold_10655	27.3787	0.36504	0.794761	0.4593
7000000231.a:SRS014613_WUGC_scaffold_6140	27.3702	0.959399	0.999274	0.9601
7000000111.a:SRS019601_WUGC_scaffold_31950	27.3641	0.677702	0.922214	0.7349
7000000100.a:SRS018817_WUGC_scaffold_28234	27.3373	0.456372	0.939445	0.4858
7000000094.a:SRS024549_LANL_scaffold_18643	27.2911	0.350136	0.543679	0.644
7000000193.a:SRS048870_WUGC_scaffold_49190	27.2309	0.491904	0.996803	0.4935
7000000532.a:SRS011529_WUGC_scaffold_14016	27.1693	0.693369	0.96458	0.7188
7000000515.a:SRS049995_LANL_scaffold_10770	27.0596	0.115417	0.346278	0.3333
7000000191.a:C3070209	27.0375	0.529029	0.754066	0.7016
7000000641.a:C2814963	27	0.491504	0.56983	0.8625
7000000490.a:C1876875	27	0.372095	0.423477	0.8787
7000000145.a:SRS050422_LANL_scaffold_32447	26.8909	0.226239	0.589243	0.3839
3300003146.a:Ga0051080_1014626	26.8575	0.246179	0.55414	0.4443
7000000069.a:SRS016095_WUGC_scaffold_36376	26.8568	0.363684	0.959529	0.379
7000000486.a:SRS015264_WUGC_scaffold_69022	26.7296	0.608174	0.969229	0.6275
7000000397.a:SRS011586_WUGC_scaffold_17969	26.7017	0.492428	0.879323	0.56
7000000646.a:SRS015960_WUGC_scaffold_15466	26.5753	0.39736	0.733032	0.5421
7000000297.a:SRS056259_LANL_scaffold_29087	26.4054	0.551978	0.998353	0.5529
7000000145.a:SRS050422_LANL_scaffold_50261	26.3825	0.466738	0.890415	0.5242
7000000040.a:SRS043411_WUGC_scaffold_51007	26.3645	0.324528	0.461401	0.7034
7000000038.a:C4276967	26.3155	0.341251	0.678687	0.5028
7000000192.a:C2496624	26.2462	0.296418	0.732765	0.4045
7000000045.a:SRS013687_Baylor_scaffold_59644	26.2409	0.447387	0.748937	0.5974
7000000131.a:SRS057717_LANL_scaffold_15371	26.2023	0.273678	0.594365	0.4605
7000000200.a:C3237195	26.1604	0.441638	0.697009	0.6336
7000000373.a:C1614031	26.1387	0.268091	0.72531	0.3696
7000000081.a:SRS017307_Baylor_scaffold_27586	25.9465	0.469943	0.811789	0.5789
7000000172.a:SRS020869_Baylor_scaffold_18816	25.794	0.451705	0.993349	0.4547
7000000011.a:SRS053214_LANL_scaffold_26478	25.6579	0.383106	0.824363	0.4647
7000000464.a:C1469436	25.6113	0.390913	0.591131	0.6613
7000000410.a:SRS019030_Baylor_scaffold_32140	25.4709	0.208108	0.5203	0.4
7000000187.a:SRS022609_Baylor_scaffold_86898	25.3549	0.350035	0.3721	0.9407
7000000011.a:SRS053214_LANL_scaffold_27270	25.2474	0.379753	0.585792	0.6483
7000000036.a:SRS049164_WUGC_scaffold_60281	25.234	0.721896	0.991366	0.7282
7000000521.a:SRS023583_Baylor_scaffold_15252	25.167	0.947243	0.964567	0.982
7000000624.a:SRS024435_LANL_scaffold_27143	25.1457	0.327818	0.393262	0.8336
7000000239.a:SRS013951_WUGC_scaffold_61504	25.1096	0.401659	0.812221	0.4945
7000000464.a:C1468428	25	0.187931	0.401639	0.4679
7000000329.a:SRS016495_LANL_scaffold_10098	25	0.133279	0.321328	0.4148
7000000186.a:SRS022524_Baylor_scaffold_18063	24.992	0.392423	0.788555	0.4976
7000000186.a:SRS022524_Baylor_scaffold_29966	24.9886	0.619965	0.996921	0.6219
7000000526.a:SRS019397_WUGC_scaffold_31708	24.9844	0.309914	0.463633	0.6684
7000000429.a:SRS045645_Baylor_scaffold_12498	24.9109	0.148772	0.39043	0.381
7000000464.a:SRS077730_LANL_scaffold_23497	24.8555	0.60188	0.825691	0.7289
7000000334.a:SRS015217_WUGC_scaffold_38988	24.646	0.951461	0.996215	0.9551
7000000464.a:SRS077730_LANL_scaffold_11463	24.6379	0.12159	0.157406	0.7725
7000000184.a:C2864449	24.5174	0.756925	0.934506	0.81
7000000516.a:SRS019161_WUGC_scaffold_61227	24.3482	0.116998	0.331709	0.3527
7000000372.a:SRS045713_WUGC_scaffold_42195	24.2424	0.21095	0.503706	0.4188
7000000669.a:SRS022713_LANL_scaffold_7528	24.0336	0.631852	0.999999	0.6319
7000000659.a:C5545944	24	0.389946	0.671672	0.5806
7000000006.a:SRS054956_LANL_scaffold_43423	24	0.186208	0.323926	0.5748
7000000641.a:C2815575	24	0.128825	0.323395	0.3984
7000000641.a:SRS018351_Baylor_scaffold_28200	23.9963	0.970929	0.99323	0.9775
7000000624.a:SRS024435_LANL_scaffold_16411	23.8143	0.93084	1	0.9308
7000000372.a:SRS045713_WUGC_scaffold_4019	23.7986	0.308971	0.657604	0.4698
7000000332.a:SRS015133_WUGC_scaffold_5206	23.7895	0.321805	0.535883	0.6005
7000000192.a:C2499092	23.6636	0.368558	0.962517	0.3829
7000000628.a:SRS015782_WUGC_scaffold_17979	23.5645	0.242782	0.422287	0.5749
7000000380.a:SRS015663_WUGC_scaffold_23774	23.5032	0.992206	1	0.9922
7000000531.a:SRS049959_WUGC_scaffold_58606	23.5026	0.197661	0.268953	0.7349
7000000011.a:SRS053214_LANL_scaffold_27249	23.4684	0.274657	0.506702	0.542
7000000515.a:C2632953	23.3825	0.998985	1	0.999
7000000484.a:SRS016018_WUGC_scaffold_24808	23.256	0.774937	0.881876	0.8787
7000000499.a:SRS016267_WUGC_scaffold_25464	23.2524	0.834314	0.999916	0.8344
7000000158.a:SRS014979_WUGC_scaffold_1793	23.252	0.828909	0.999929	0.829
7000000661.a:SRS052027_LANL_scaffold_16369	23.1958	0.80512	0.999917	0.8052
7000000444.a:SRS063985_LANL_scaffold_50521	23.1036	0.228523	0.418867	0.5456
7000000407.a:SRS019267_WUGC_scaffold_20499	23.0378	0.498182	0.970296	0.5134
7000000434.a:SRS014287_WUGC_scaffold_36376	23.0026	0.442941	0.518959	0.8535
7000000093.a:C1839549	23	0.585148	0.588277	0.9947
7000000258.a:SRS016335_WUGC_scaffold_18394	22.9759	0.434202	0.790321	0.5494
7000000071.a:SRS065504_LANL_scaffold_46432	22.9275	0.50387	0.757622	0.6651
7000000332.a:SRS015133_WUGC_scaffold_13419	22.8858	0.732141	0.981428	0.746
7000000192.a:SRS017821_Baylor_scaffold_11436	22.8785	0.801639	0.9945	0.8061
7000000317.a:C2697063	22.7893	0.450869	0.654603	0.6888
7000000265.a:C2880637	22.61	0.704139	0.965159	0.7296
7000000570.a:C2595871	22.5764	0.711	0.961731	0.7393
7000000032.a:C3924948	22.4355	0.488565	0.63806	0.7657
7000000628.a:C3498135	22.4149	0.567987	0.870516	0.6525
7000000526.a:SRS019397_WUGC_scaffold_31587	22.3902	0.274172	0.548221	0.5001
7000000499.a:SRS016267_WUGC_scaffold_4909	22.3489	0.573438	0.76366	0.7509
7000000158.a:SRS014979_WUGC_scaffold_17287	22.3066	0.592482	0.952622	0.6219
7000000695.a:SRS049900_LANL_scaffold_9781	22.2996	0.779677	0.979508	0.796
7000000232.a:SRS015578_WUGC_scaffold_46396	22.1796	0.371455	0.616873	0.6022
7000000498.a:SRS017521_Baylor_scaffold_19097	22.1078	0.234919	0.434087	0.5412
7000000609.a:SRS056519_LANL_scaffold_25052	22.1023	0.417777	0.668234	0.6252
7000000740.a:SRS064276_LANL_scaffold_19707	22.0928	0.260253	0.828671	0.3141
7000000515.a:SRS049995_LANL_scaffold_4188	22.0039	0.386271	0.822771	0.4695
7000000071.a:SRS065504_LANL_scaffold_50919	21.9526	0.481357	0.839222	0.5736
7000000372.a:C3208994	21.8408	0.668407	0.97817	0.6833
7000000302.a:SRS023914_Baylor_scaffold_21606	21.8233	1	1	1
7000000441.a:SRS015794_Baylor_scaffold_32463	21.7948	0.114572	0.371428	0.3085
7000000459.a:SRS012902_Baylor_scaffold_1208	21.7849	0.990056	1	0.9901
7000000661.a:C1907614	21.7661	0.757032	1	0.757
7000000740.a:SRS064276_LANL_scaffold_28959	21.7076	0.170988	0.351922	0.4859
7000000332.a:SRS015133_WUGC_scaffold_20366	21.6916	0.52085	0.571142	0.9119
7000000736.a:SRS014235_WUGC_scaffold_71148	21.643	0.29181	0.399272	0.7309
7000000188.a:C2348361	21.4859	0.628727	0.607581	0.9664
7000000348.a:SRS017701_Baylor_scaffold_21322	21.4702	0.945212	0.992682	0.9522
7000000684.a:SRS019582_WUGC_scaffold_28185	21.4581	0.999855	1	0.9999
7000000006.a:SRS054956_LANL_scaffold_36467	21.4396	0.262171	0.852041	0.3077
7000000736.a:SRS014235_WUGC_scaffold_4140	21.4157	0.30295	0.678158	0.4467
7000000684.a:SRS019582_WUGC_scaffold_26286	21.3085	0.117063	0.335664	0.3487
7000000232.a:C2670102	21.2851	0.234167	0.53356	0.4389
7000000317.a:SRS014459_WUGC_scaffold_28345	21.2712	0.212089	0.498326	0.4256
7000000380.a:SRS015663_WUGC_scaffold_16964	21.2288	0.627477	0.928408	0.6759
7000000193.a:SRS048870_WUGC_scaffold_8930	21.1765	0.29938	0.558809	0.5357
7000000289.a:SRS024331_LANL_scaffold_20834	21.1704	0.588796	0.595642	0.9885
7000000531.a:SRS049959_WUGC_scaffold_6459	21.1347	0.238493	0.62728	0.3802
7000000434.a:SRS014287_WUGC_scaffold_30022	21.1277	0.740939	0.999977	0.741
7000000108.a:C2493864	21.0578	0.364422	0.728654	0.5001
7000000490.a:SRS013800_Baylor_scaffold_1112	21.0488	0.916919	1	0.9169
7000000100.a:C2136894	21	0.192218	0.469827	0.4091
7000000410.a:SRS019030_Baylor_scaffold_26421	20.9321	0.603338	0.928879	0.6495
7000000684.a:SRS019582_WUGC_scaffold_85053	20.9114	0.182674	0.34493	0.5296
7000000193.a:SRS048870_WUGC_scaffold_43658	20.9025	0.282369	0.346476	0.815
7000000200.a:SRS023526_Baylor_scaffold_5433	20.8314	0.107316	0.199817	0.5371
7000000370.a:SRS017191_Baylor_scaffold_1360	20.8135	0.216589	0.475494	0.4555
7000000481.a:SRS047014_WUGC_scaffold_79004	20.7453	0.285392	0.780962	0.3654
7000000464.a:SRS077730_LANL_scaffold_8388	20.6982	0.766451	0.999988	0.7665
7000000081.a:C2525560	20.5607	0.176112	0.422869	0.4165
7000000516.a:SRS019161_WUGC_scaffold_24614	20.5227	0.999917	1	0.9999
7000000171.a:SRS052697_LANL_scaffold_37726	20.4977	0.472868	0.999929	0.4729
7000000022.a:SRS011452_WUGC_scaffold_16370	20.4811	0.168628	0.38206	0.4414
7000000684.a:SRS019582_WUGC_scaffold_92776	20.4097	0.11777	0.358231	0.3288
7000000192.a:SRS017821_Baylor_scaffold_24843	20.4037	0.129233	0.372386	0.347
7000000333.a:SRS050925_LANL_scaffold_63454	20.3889	0.194754	0.562885	0.346
7000000317.a:C2697711	20.3263	0.397192	0.540091	0.7354
7000000038.a:C4270540	20.2977	0.254211	0.758167	0.3353
7000000380.a:SRS015663_WUGC_scaffold_41101	20.2883	0.166927	0.241463	0.6913
7000000669.a:SRS022713_LANL_scaffold_22469	20.1879	0.680703	0.955883	0.7121
7000000334.a:SRS015217_WUGC_scaffold_6982	20.123	0.748019	0.999997	0.748
7000000526.a:SRS019397_WUGC_scaffold_10964	20.0959	0.329373	0.741382	0.4443
7000000111.a:SRS019601_WUGC_scaffold_46695	20.0599	0.670352	0.795496	0.8427
7000000587.a:C749959	20.025	0.530913	0.556772	0.9536
7000000333.a:SRS050925_LANL_scaffold_72543	19.9949	0.579595	0.982882	0.5897
7000000332.a:SRS015133_WUGC_scaffold_4808	19.9244	0.646475	0.994361	0.6501
7000000410.a:SRS019030_Baylor_scaffold_39474	19.9037	0.334604	0.384515	0.8702
7000000262.a:SRS047044_WUGC_scaffold_29602	19.8248	0.236025	0.456172	0.5174
7000000484.a:SRS016018_WUGC_scaffold_15730	19.6762	0.86639	1	0.8664
7000000032.a:SRS024132_Baylor_scaffold_37888	19.6705	0.473919	0.596197	0.7949
7000000740.a:SRS064276_LANL_scaffold_71101	19.6365	0.357229	0.354748	0.9931
7000000410.a:SRS019030_Baylor_scaffold_34574	19.6298	0.293091	0.331107	0.8852
7000000516.a:SRS019161_WUGC_scaffold_54354	19.6008	0.187926	0.441464	0.4257
7000000659.a:SRS015854_WUGC_scaffold_35050	19.5978	0.679653	0.758744	0.8958
7000000407.a:SRS019267_WUGC_scaffold_3426	19.5599	0.537259	0.997686	0.5385
7000000486.a:SRS015264_WUGC_scaffold_10685	19.5287	0.163708	0.338798	0.4832
7000000111.a:SRS019601_WUGC_scaffold_21474	19.5141	0.599199	0.587118	0.9798
7000000434.a:SRS014287_WUGC_scaffold_38713	19.4208	0.333176	0.585785	0.5688
7000000100.a:SRS018817_WUGC_scaffold_8497	19.413	0.170683	0.244129	0.6991
7000000040.a:SRS043411_WUGC_scaffold_50233	19.3756	0.366383	0.85658	0.4277
7000000531.a:SRS049959_WUGC_scaffold_28175	19.329	0.241709	0.468647	0.5158
7000000626.a:SRS064557_LANL_scaffold_37881	19.2345	0.996802	1	0.9968
7000000252.a:C2208984	19.2193	0.260465	0.650472	0.4004
7000000320.a:C3352396	19.2056	0.571401	0.892863	0.64
7000000429.a:C2072355	19.1788	0.377342	0.845102	0.4465
7000000484.a:SRS016018_WUGC_scaffold_24455	19.0431	0.832151	0.827096	0.9939
7000000265.a:C2881239	19.0222	0.187607	0.496173	0.3781
7000000098.a:SRS023176_Baylor_scaffold_12944	19	0.366052	0.378892	0.9661
3300000589.a:Draft_100005	19	0.305027	0.505816	0.603
7000000231.a:C1594339	19	0.188111	0.214534	0.8768
7000000193.a:SRS048870_WUGC_scaffold_36338	19	0.125059	0.172504	0.725
7000000531.a:SRS049959_WUGC_scaffold_59786	19	0.301	0.425649	0.7072
7000000736.a:C3558306	18.9614	0.654166	0.983	0.6655
7000000087.a:C2383988	18.9081	0.424473	0.611084	0.6946
7000000352.a:SRS014923_WUGC_scaffold_54192	18.9073	0.165019	0.372885	0.4425
7000000460.a:SRS051031_LANL_scaffold_69379	18.8479	0.629924	0.830622	0.7584
7000000142.a:C1101728	18.8324	0.596219	0.669086	0.8911
7000000258.a:SRS016335_WUGC_scaffold_35177	18.7888	0.285179	0.426826	0.6681
7000000628.a:SRS015782_WUGC_scaffold_3450	18.759	0.425879	0.810527	0.5254
7000000401.a:SRS011271_WUGC_scaffold_40435	18.7445	0.635156	0.857416	0.7408
7000000509.a:SRS054590_LANL_scaffold_9190	18.7391	0.103001	0.233616	0.4409
7000000333.a:SRS050925_LANL_scaffold_56190	18.7331	0.811574	0.988224	0.8212
7000000172.a:SRS020869_Baylor_scaffold_15694	18.6754	0.174206	0.440845	0.3952
7000000546.a:SRS019910_WUGC_scaffold_398	18.6578	0.119678	0.199308	0.6005
7000000429.a:C2069907	18.5378	0.291802	0.472285	0.6179
7000000081.a:SRS017307_Baylor_scaffold_15004	18.5148	0.960264	0.999959	0.9603
7000000332.a:SRS015133_WUGC_scaffold_42997	18.416	0.289331	0.513019	0.564
7000000646.a:SRS015960_WUGC_scaffold_30066	18.3533	0.301856	0.780371	0.3868
7000000265.a:C2882851	18.2638	0.362977	0.572454	0.6341
7000000036.a:SRS049164_WUGC_scaffold_13311	18.2531	0.917752	0.970305	0.9458
7000000624.a:SRS024435_LANL_scaffold_32633	18.2014	0.132241	0.319093	0.4144
7000000187.a:SRS022609_Baylor_scaffold_78074	18.1818	0.154636	0.345777	0.4472
7000000609.a:SRS056519_LANL_scaffold_32078	18	0.549668	0.622852	0.8825
7000000418.a:C3798363	18	0.175338	0.271036	0.6469
7000000385.a:C1840579	18	0.114368	0.352543	0.3244
2061766007.a:rumenHiSeq_NODE_3031602_len_6188_cov_1_867162	18	0.18211	0.353199	0.5156
7000000174.a:C7614445	18	0.559163	0.565681	0.9885
7000000032.a:SRS024132_Baylor_scaffold_37363	17.9999	0.487924	0.706506	0.6906
7000000187.a:SRS022609_Baylor_scaffold_14461	17.9975	0.381217	0.428287	0.8901
7000000239.a:SRS013951_WUGC_scaffold_6400	17.881	0.160393	0.199588	0.8036
7000000515.a:SRS049995_LANL_scaffold_21538	17.7668	0.870811	0.999998	0.8708
7000000271.a:SRS053335_LANL_scaffold_28106	17.6461	0.755091	0.956778	0.7892
7000000515.a:SRS049995_LANL_scaffold_22954	17.6291	0.118344	0.378218	0.3129
7000000684.a:SRS019582_WUGC_scaffold_92874	17.6219	0.129411	0.24498	0.5283
7000000006.a:SRS054956_LANL_scaffold_45793	17.6061	0.38737	0.412995	0.938
7000000582.a:SRS019787_WUGC_scaffold_26543	17.6027	0.676554	0.723009	0.9357
7000000239.a:SRS013951_WUGC_scaffold_52327	17.5298	0.332319	0.474515	0.7003
7000000735.a:SRS015190_WUGC_scaffold_1706	17.513	0.360042	0.493104	0.7302
7000000482.a:SRS016541_Baylor_scaffold_5878	17.4868	0.989193	1	0.9892
7000000186.a:SRS022524_Baylor_scaffold_20632	17.4304	0.700893	0.89502	0.7831
7000000087.a:C2383996	17.4022	0.625999	0.681784	0.9182
7000000172.a:SRS020869_Baylor_scaffold_9123	17.3528	0.699184	0.876232	0.7979
7000000669.a:SRS022713_LANL_scaffold_3154	17.348	0.264379	0.776459	0.3405
7000000407.a:SRS019267_WUGC_scaffold_9736	17.3204	0.283232	0.709567	0.3992
7000000740.a:SRS064276_LANL_scaffold_40809	17.2767	0.609919	0.872328	0.6992
7000000433.a:SRS050752_LANL_scaffold_275	17.1354	0.954581	0.999168	0.9554
7000000434.a:SRS014287_WUGC_scaffold_38968	17.0983	0.656824	0.755202	0.8697
7000000188.a:SRS053398_LANL_scaffold_10547	17.0338	0.421743	0.489422	0.8617
7000000071.a:SRS065504_LANL_scaffold_5889	17.0271	0.713247	0.873186	0.8168
7000000178.a:SRS017247_LANL_scaffold_15920	17.0174	0.419778	0.482896	0.8693
7000000192.a:SRS017821_Baylor_scaffold_7871	17.0054	0.997896	1	0.9979
7000000086.a:SRS049147_LANL_scaffold_44533	17	0.215629	0.250791	0.8598
7000000417.a:SRS011239_Baylor_scaffold_6136	16.9559	0.976079	0.993692	0.9823
7000000252.a:C2206694	16.9358	0.257012	0.587401	0.4375
7000000492.a:SRS048164_WUGC_scaffold_33739	16.9273	0.701478	0.981619	0.7146
7000000410.a:SRS019030_Baylor_scaffold_39506	16.8281	0.543064	0.902711	0.6016
7000000433.a:SRS050752_LANL_scaffold_46675	16.7573	0.31924	0.443298	0.7201
7000000410.a:C1749499	16.7483	0.544757	0.997615	0.5461
7000000736.a:SRS014235_WUGC_scaffold_70506	16.6993	0.348466	0.50078	0.6958
7000000532.a:SRS011529_WUGC_scaffold_21093	16.6309	0.821338	1	0.8213
7000000231.a:SRS014613_WUGC_scaffold_33953	16.5491	0.21758	0.335044	0.6494
7000000239.a:SRS013951_WUGC_scaffold_30857	16.4871	0.241954	0.2852	0.8484
7000000624.a:SRS024435_LANL_scaffold_20867	16.4341	0.212664	0.679018	0.3132
7000000549.a:SRS013521_LANL_scaffold_19124	16.4306	0.14063	0.32623	0.4311
7000000418.a:SRS012273_Baylor_scaffold_24391	16.4168	0.469896	0.700052	0.6712
7000000258.a:C5292139	16.3649	0.151249	0.464431	0.3257
7000000484.a:C1313927	16.2661	0.295852	0.942926	0.3138
7000000624.a:C3236958	16.2202	0.344301	0.599158	0.5746
7000000213.a:SRS011405_WUGC_scaffold_26491	16.188	0.458173	0.565937	0.8096
7000000332.a:SRS015133_WUGC_scaffold_36904	16.1779	0.20447	0.445252	0.4592
7000000655.a:SRS019968_Baylor_scaffold_8866	16.1661	0.383019	0.847467	0.452
7000000289.a:SRS024331_LANL_scaffold_49128	16.1657	0.463752	0.680454	0.6815
7000000433.a:SRS050752_LANL_scaffold_11947	16.0834	0.518409	0.757732	0.6842
7000000040.a:SRS043411_WUGC_scaffold_49818	16.021	0.971346	0.993985	0.9772
7000000278.a:C4653273	16.0095	0.759844	0.990445	0.7672
7000000289.a:SRS024331_LANL_scaffold_48910	16	0.19899	0.22205	0.8961
7000000624.a:C3233038	16	0.224986	0.544338	0.4133
7000000417.a:SRS011239_Baylor_scaffold_29275	16	0.103555	0.265874	0.3895
7000000111.a:SRS019601_WUGC_scaffold_27071	16	0.196288	0.361788	0.5426
7000000627.a:SRS014313_WUGC_scaffold_2536	15.9871	0.654056	0.873665	0.7486
7000000186.a:SRS022524_Baylor_scaffold_27158	15.9692	0.589282	0.794931	0.7413
7000000460.a:SRS051031_LANL_scaffold_58044	15.8515	1	1	1
7000000334.a:C2389622	15.8334	0.149821	0.455443	0.329
7000000320.a:SRS063040_Baylor_scaffold_34718	15.789	0.360394	0.812051	0.4438
7000000515.a:SRS049995_LANL_scaffold_29840	15.7832	0.132996	0.413012	0.322
7000000433.a:SRS050752_LANL_scaffold_41621	15.7768	0.161168	0.224608	0.7176
7000000333.a:SRS050925_LANL_scaffold_18651	15.6965	0.103956	0.174597	0.5954
7000000038.a:C4272154	15.6424	0.368504	0.785097	0.4694
7000000401.a:SRS011271_WUGC_scaffold_40876	15.6123	0.273876	0.754857	0.3628
7000000200.a:SRS023526_Baylor_scaffold_35780	15.6123	0.273876	0.754857	0.3628
7000000633.a:C2482074	15.5619	0.424567	0.806381	0.5265
7000000308.a:SRS058770_LANL_scaffold_39596	15.5394	0.137087	0.35972	0.3811
7000000633.a:SRS015065_WUGC_scaffold_21081	15.5116	0.211288	0.324771	0.6506
7000000433.a:SRS050752_LANL_scaffold_9299	15.4299	0.153677	0.468014	0.3284
7000000425.a:SRS013476_Baylor_scaffold_3094	15.294	0.348954	0.569324	0.6129
7000000532.a:SRS011529_WUGC_scaffold_14582	15.2043	0.532374	0.768899	0.6924
7000000181.a:SRS018656_WUGC_scaffold_1644	15.1946	0.335212	0.818368	0.4096
7000000570.a:SRS051882_Baylor_scaffold_4501	15.1473	0.487158	0.873839	0.5575
7000000546.a:SRS019910_WUGC_scaffold_54060	15.0954	0.981694	1	0.9817
7000000192.a:SRS017821_Baylor_scaffold_23917	15.0889	0.755937	0.995386	0.7594
7000000401.a:C3191193	15.0204	0.596767	0.998157	0.5979
7000000481.a:SRS047014_WUGC_scaffold_32884	15.0024	0.812605	0.953532	0.8522
7000000417.a:SRS011239_Baylor_scaffold_10449	15	0.267457	0.309824	0.8633
7000000111.a:SRS019601_WUGC_scaffold_28783	15	0.30363	0.392468	0.7736
7000000187.a:SRS022609_Baylor_scaffold_27984	15	0.165612	0.277486	0.5968
7000000232.a:SRS015578_WUGC_scaffold_43146	15	0.31612	0.329351	0.9598
3300003146.a:Ga0051080_1009782	14.9248	0.216785	0.434508	0.4989
7000000193.a:SRS048870_WUGC_scaffold_42492	14.858	0.492043	0.675586	0.7283
7000000417.a:C2692146	14.839	0.290375	0.351625	0.8258
7000000669.a:SRS022713_LANL_scaffold_25646	14.8257	0.911756	0.928859	0.9816
7000000296.a:C1829082	14.7886	0.280875	0.579354	0.4848
7000000317.a:C2694353	14.7134	0.242955	0.577907	0.4204
7000000040.a:SRS043411_WUGC_scaffold_49100	14.6462	0.417969	0.999974	0.418
7000000475.a:SRS020328_Baylor_scaffold_34917	14.6288	0.366284	0.716329	0.5113
7000000107.a:SRS042628_WUGC_scaffold_36989	14.5565	0.120547	0.210836	0.5718
3300003146.a:Ga0051080_1010888	14.5494	0.266846	0.407738	0.6545
7000000093.a:SRS022137_LANL_scaffold_10104	14.5419	0.349451	0.450552	0.7756
7000000187.a:SRS022609_Baylor_scaffold_89137	14.5066	0.353481	0.432484	0.8173
7000000187.a:SRS022609_Baylor_scaffold_87617	14.4421	0.544748	0.682145	0.7986
7000000492.a:SRS048164_WUGC_scaffold_34715	14.3436	0.361014	0.515148	0.7008
7000000317.a:SRS014459_WUGC_scaffold_95766	14.3248	0.296336	0.543183	0.5456
7000000418.a:SRS012273_Baylor_scaffold_29382	14.2921	0.463922	0.938842	0.4941
7000000538.a:SRS024075_LANL_scaffold_10956	14.2677	0.42833	0.880265	0.4866
7000000352.a:SRS014923_WUGC_scaffold_3972	14.2656	0.382513	0.879964	0.4347
7000000011.a:SRS053214_LANL_scaffold_22404	14.2441	0.266578	0.413707	0.6444
7000000334.a:SRS015217_WUGC_scaffold_13989	14.2222	0.103831	0.135202	0.768
7000000171.a:SRS052697_LANL_scaffold_5581	14.2107	0.261184	0.503792	0.5184
7000000736.a:SRS014235_WUGC_scaffold_55296	14.1911	0.999941	1	0.9999
7000000540.a:SRS023346_LANL_scaffold_8800	14.1654	0.21902	0.510716	0.4288
7000000425.a:SRS013476_Baylor_scaffold_7443	14.1622	0.999222	1	0.9992
7000000433.a:SRS050752_LANL_scaffold_46098	14.158	0.261537	0.363773	0.719
7000000659.a:SRS015854_WUGC_scaffold_39874	14.0897	0.583981	0.892514	0.6543
7000000531.a:SRS049959_WUGC_scaffold_27121	14.076	0.506088	0.863143	0.5863
7000000186.a:SRS022524_Baylor_scaffold_22004	14.0361	0.328715	0.400668	0.8204
7000000317.a:C2699781	14.0055	0.953623	0.997577	0.9559
7000000498.a:SRS017521_Baylor_scaffold_33659	14	0.387034	0.384462	0.9934
7000000045.a:SRS013687_Baylor_scaffold_50138	14	0.198278	0.240716	0.8237
7000000690.a:SRS055982_Baylor_scaffold_13701	14	0.303606	0.371092	0.8181
7000000145.a:SRS050422_LANL_scaffold_95325	14	0.431919	0.47444	0.9104
7000000490.a:C1875089	14	0.338139	0.358192	0.944
7000000418.a:SRS012273_Baylor_scaffold_36981	14	0.174559	0.173813	0.9957
3300003155.a:Ga0052270_10359846	14	0.168596	0.183803	0.9173
7000000100.a:SRS018817_WUGC_scaffold_2525	13.9573	0.116294	0.150681	0.7718
7000000429.a:C2070989	13.8845	0.42469	0.768975	0.5523
7000000509.a:SRS054590_LANL_scaffold_10841	13.8606	0.785178	0.999732	0.7854
7000000546.a:SRS019910_WUGC_scaffold_16048	13.8553	0.997669	1	0.9977
7000000069.a:SRS016095_WUGC_scaffold_39600	13.8227	0.360863	0.638237	0.5654
7000000262.a:C1618816	13.7973	0.970256	0.954228	0.9835
7000000200.a:C3236715	13.7936	0.404973	0.982183	0.4123
7000000145.a:SRS050422_LANL_scaffold_87171	13.7295	0.493544	0.783891	0.6296
7000000193.a:SRS048870_WUGC_scaffold_52698	13.7009	0.219285	0.595554	0.3682
7000000433.a:SRS050752_LANL_scaffold_38608	13.649	0.504632	0.816747	0.6179
7000000538.a:C1598091	13.6456	0.432258	0.509743	0.848
7000000213.a:SRS011405_WUGC_scaffold_21930	13.6336	0.11922	0.316729	0.3764
7000000585.a:C20418161	13.5959	0.267148	0.397211	0.6726
7000000736.a:SRS014235_WUGC_scaffold_21072	13.527	0.134822	0.369367	0.365
7000000370.a:SRS017191_Baylor_scaffold_21101	13.5116	0.52051	0.765837	0.6797
7000000410.a:SRS019030_Baylor_scaffold_12960	13.5041	0.354006	0.447854	0.7904
7000000684.a:SRS019582_WUGC_scaffold_71208	13.4887	0.314281	0.570507	0.5509
7000000188.a:C2347875	13.4613	0.645592	1	0.6456
7000000646.a:SRS015960_WUGC_scaffold_8130	13.4155	0.999175	1	0.9992
7000000178.a:SRS017247_LANL_scaffold_6266	13.3948	0.994884	1	0.9949
7000000486.a:SRS015264_WUGC_scaffold_17419	13.3562	0.173259	0.274473	0.6312
7000000418.a:C3792460	13.3457	0.195301	0.416835	0.4685
7000000372.a:SRS045713_WUGC_scaffold_13116	13.3067	0.152818	0.50346	0.3035
7000000232.a:SRS015578_WUGC_scaffold_37181	13.2971	0.326277	0.518391	0.6294
7000000352.a:SRS014923_WUGC_scaffold_46658	13.2873	0.203847	0.51097	0.3989
7000000131.a:SRS057717_LANL_scaffold_17935	13.231	0.368353	0.497214	0.7408
7000000486.a:SRS015264_WUGC_scaffold_3896	13.2083	0.996976	1	0.997
7000000475.a:SRS020328_Baylor_scaffold_37987	13.2035	0.718565	1	0.7186
7000000372.a:SRS045713_WUGC_scaffold_13171	13.1157	0.85422	1	0.8542
7000000302.a:SRS023914_Baylor_scaffold_9706	13.0836	0.220794	0.370378	0.5961
7000000332.a:SRS015133_WUGC_scaffold_42816	13.0493	0.475959	0.782507	0.6082
7000000633.a:SRS015065_WUGC_scaffold_39492	13	0.174516	0.188329	0.9267
7000000425.a:C3130396	13	0.1409	0.384478	0.3665
7000000040.a:C1643922	12.996	0.16961	0.428577	0.3958
7000000053.a:SRS013215_Baylor_scaffold_2815	12.9887	0.130236	0.428368	0.304
7000000509.a:SRS054590_LANL_scaffold_11218	12.8822	0.23245	0.267849	0.8678
7000000077.a:SRS064645_LANL_scaffold_6232	12.7474	0.369517	0.613268	0.6025
7000000200.a:SRS023526_Baylor_scaffold_9232	12.7058	0.784474	0.96917	0.8094
7000000297.a:SRS056259_LANL_scaffold_20335	12.6818	0.368259	0.744732	0.4945
7000000086.a:SRS049147_LANL_scaffold_13615	12.5861	0.108247	0.146975	0.7365
7000000334.a:SRS015217_WUGC_scaffold_25508	12.5495	0.425082	0.834081	0.5096
7000000516.a:SRS019161_WUGC_scaffold_67256	12.541	0.140369	0.224989	0.6239
7000000317.a:C2697151	12.5229	0.240373	0.331385	0.7254
7000000444.a:SRS063985_LANL_scaffold_5082	12.5053	0.311249	0.673804	0.4619
7000000186.a:SRS022524_Baylor_scaffold_74427	12.45	0.912711	0.987745	0.924
7000000659.a:SRS015854_WUGC_scaffold_39824	12.4125	0.468906	0.80044	0.5858
7000000690.a:SRS055982_Baylor_scaffold_7629	12.3953	0.999926	1	0.9999
7000000546.a:SRS019910_WUGC_scaffold_76477	12.3756	0.997231	1	0.9972
7000000531.a:SRS049959_WUGC_scaffold_59413	12.2736	0.706505	0.92471	0.764
7000000040.a:C1641951	12.2714	0.920784	0.950647	0.9686
7000000403.a:SRS024388_LANL_scaffold_13028	12.2508	0.371627	0.677391	0.5486
7000000418.a:C3794804	12.2199	0.479276	0.578219	0.8289
7000000006.a:SRS054956_LANL_scaffold_3235	12.1879	0.249641	0.360124	0.6932
7000000546.a:SRS019910_WUGC_scaffold_49418	12.1804	0.958213	0.970309	0.9875
7000000332.a:C3521700	12.1779	0.132669	0.281231	0.4717
7000000300.a:SRS043701_LANL_scaffold_13453	12.1679	0.10867	0.161301	0.6737
7000000178.a:C1045644	12.1471	0.202468	0.231411	0.8749
7000000633.a:SRS015065_WUGC_scaffold_42976	12.1341	0.257149	0.547261	0.4699
7000000633.a:SRS015065_WUGC_scaffold_12353	12.0829	0.867237	1	0.8672
7000000191.a:C3073147	12.0457	0.287527	0.361141	0.7962
7000000410.a:SRS019030_Baylor_scaffold_40312	12.0434	0.122392	0.280209	0.4368
7000000011.a:SRS053214_LANL_scaffold_14958	12.0162	0.999754	1	0.9998
7000000093.a:SRS022137_LANL_scaffold_20611	12.0131	0.299685	0.421775	0.7105
7000000184.a:SRS016954_Baylor_scaffold_31832	12	0.27983	0.434317	0.6443
7000000492.a:C2358112	12	0.34106	0.411049	0.8297
7000000385.a:SRS017433_Baylor_scaffold_3382	11.966	0.326909	0.476506	0.6861
7000000186.a:SRS022524_Baylor_scaffold_75256	11.9611	0.448866	0.784557	0.5721
7000000632.a:SRS050299_LANL_scaffold_14425	11.9554	0.173757	0.316631	0.5488
7000000549.a:SRS013521_LANL_scaffold_2260	11.9366	0.472178	0.683155	0.6912
7000000297.a:SRS056259_LANL_scaffold_47742	11.9291	0.125962	0.407668	0.309
7000000509.a:SRS054590_LANL_scaffold_12310	11.8813	0.180906	0.326566	0.554
7000000373.a:SRS016989_Baylor_scaffold_21089	11.8508	0.358742	0.501404	0.7155
7000000193.a:SRS048870_WUGC_scaffold_41496	11.7893	0.355229	0.539103	0.6589
7000000740.a:SRS064276_LANL_scaffold_21154	11.7855	0.426724	0.908758	0.4696
7000000661.a:C1906798	11.7657	0.106248	0.190305	0.5583
7000000397.a:SRS011586_WUGC_scaffold_1057	11.7597	0.345208	0.832228	0.4148
7000000352.a:SRS014923_WUGC_scaffold_27424	11.6775	0.401752	0.783015	0.5131
7000000352.a:SRS014923_WUGC_scaffold_6443	11.6685	0.50699	0.592288	0.856
7000000735.a:SRS015190_WUGC_scaffold_19149	11.665	0.575174	0.984981	0.5839
7000000200.a:SRS023526_Baylor_scaffold_8259	11.6266	0.656833	0.999383	0.6572
7000000740.a:SRS064276_LANL_scaffold_34993	11.6203	0.916717	0.999998	0.9167
7000000297.a:SRS056259_LANL_scaffold_57079	11.604	0.815897	0.999772	0.8161
7000000627.a:C2700453	11.5684	0.271987	0.273638	0.994
7000000641.a:SRS018351_Baylor_scaffold_10421	11.5317	0.53359	0.767898	0.6949
7000000410.a:SRS019030_Baylor_scaffold_39935	11.514	0.280992	0.350776	0.8011
7000000334.a:SRS015217_WUGC_scaffold_38977	11.5094	0.998186	1	0.9982
7000000641.a:SRS018351_Baylor_scaffold_32329	11.5053	0.376529	0.737349	0.5107
7000000077.a:SRS064645_LANL_scaffold_3059	11.4116	0.740586	0.982551	0.7537
7000000178.a:C1045184	11.3807	0.850846	0.995183	0.855
7000000509.a:SRS054590_LANL_scaffold_5067	11.3235	0.188106	0.478201	0.3934
7000000484.a:SRS016018_WUGC_scaffold_8407	11.3141	0.130357	0.287508	0.4534
7000000075.a:SRS016056_WUGC_scaffold_13002	11.2944	0.390472	0.580571	0.6726
7000000038.a:C4277309	11.288	0.29011	0.622877	0.4658
7000000407.a:C3633282	11.2497	0.357105	0.546323	0.6537
7000000417.a:SRS011239_Baylor_scaffold_29524	11.2438	0.312758	0.499951	0.6256
7000000582.a:SRS019787_WUGC_scaffold_25763	11.0819	0.785627	1	0.7856
7000000145.a:SRS050422_LANL_scaffold_82453	11.0752	0.391308	0.699732	0.5592
7000000455.a:C5189444	11.0185	0.149417	0.355871	0.4199
7000000187.a:SRS022609_Baylor_scaffold_23433	11.0049	0.215542	0.345564	0.6237
7000000184.a:SRS016954_Baylor_scaffold_26212	10.9301	1	1	1
7000000036.a:SRS049164_WUGC_scaffold_10156	10.9051	0.644503	0.925098	0.6967
7000000360.a:SRS016585_Baylor_scaffold_4329	10.8122	0.24097	0.342658	0.7032
7000000171.a:SRS052697_LANL_scaffold_69835	10.7887	0.295896	0.391311	0.7562
7000000200.a:SRS023526_Baylor_scaffold_18117	10.7826	0.324317	0.624982	0.5189
7000000289.a:SRS024331_LANL_scaffold_44504	10.7564	0.520755	0.875046	0.5951
7000000684.a:SRS019582_WUGC_scaffold_20317	10.6781	0.567751	0.762235	0.7449
7000000296.a:C1828125	10.6636	0.346412	0.678746	0.5104
7000000297.a:SRS056259_LANL_scaffold_14132	10.6624	0.109825	0.223604	0.4912
7000000484.a:SRS016018_WUGC_scaffold_10654	10.6353	0.478892	0.931929	0.5139
7000000498.a:SRS017521_Baylor_scaffold_54115	10.6108	0.656299	0.664779	0.9872
7000000187.a:SRS022609_Baylor_scaffold_43683	10.4196	0.429447	0.652136	0.6585
7000000418.a:SRS012273_Baylor_scaffold_25114	10.3916	0.107017	0.306273	0.3494
7000000490.a:C1873301	10.3085	0.767385	0.994684	0.7715
7000000352.a:SRS014923_WUGC_scaffold_59717	10.2946	0.993431	1	0.9934
7000000526.a:SRS019397_WUGC_scaffold_18840	10.2774	0.314832	0.599588	0.5251
7000000038.a:C4275979	10.2615	0.194601	0.357006	0.5451
7000000515.a:SRS049995_LANL_scaffold_14408	10.2496	0.159716	0.464983	0.3435
7000000142.a:C1101850	10.2387	0.383014	0.99584	0.3846
7000000320.a:SRS063040_Baylor_scaffold_1210	10.1921	0.555684	0.903075	0.6153
7000000246.a:SRS078176_LANL_scaffold_28266	10.1868	0.298203	0.391841	0.761
7000000158.a:SRS014979_WUGC_scaffold_27768	10.1147	0.145271	0.215185	0.6751
7000000333.a:SRS050925_LANL_scaffold_73651	10.038	0.205367	0.392241	0.5236
7000000484.a:SRS016018_WUGC_scaffold_18800	10.0273	0.35364	0.857658	0.4123
7000000077.a:SRS064645_LANL_scaffold_2444	10.0062	0.517872	0.900845	0.5749
7000000403.a:C1507932	10	0.242051	0.307706	0.7866
7000000417.a:SRS011239_Baylor_scaffold_30119	10	0.346344	0.370777	0.9341
7000000334.a:C2391372	10	0.14211	0.168592	0.8429

## Sheet: 4.Donor-sample4
#IMG/VR-ID	EstimatedAbundance	Support, Co	PredictedSupport, Ce	Ratio, R
7000000498.a:SRS017521_Baylor_scaffold_5189	38746	0.981266	1	0.9813
7000000695.a:SRS049900_LANL_scaffold_14438	32124.7	1	1	1
7000000334.a:SRS015217_WUGC_scaffold_5454	20008	1	1	1
7000000171.a:SRS052697_LANL_scaffold_25054	17298.1	1	1	1
7000000302.a:SRS023914_Baylor_scaffold_13777	14824.9	0.691598	1	0.6916
7000000040.a:SRS043411_WUGC_scaffold_48710	9780	0.971436	1	0.9714
7000000300.a:SRS043701_LANL_scaffold_4863	8963.84	1	1	1
7000000486.a:SRS015264_WUGC_scaffold_7670	8008.36	0.901018	1	0.901
7000000171.a:SRS052697_LANL_scaffold_35380	7499.5	0.985998	1	0.986
7000000093.a:SRS022137_LANL_scaffold_29955	7444.57	0.999231	1	0.9992
7000000296.a:SRS024009_Baylor_scaffold_5167	7190.86	0.999196	1	0.9992
7000000486.a:SRS015264_WUGC_scaffold_9389	7167.18	0.498737	1	0.4987
7000000040.a:SRS043411_WUGC_scaffold_39395	6853.48	0.729956	1	0.73
7000000712.a:SRS057478_LANL_scaffold_16118	6734.2	0.87368	1	0.8737
7000000171.a:SRS052697_LANL_scaffold_62758	6733.46	0.326866	1	0.3269
7000000111.a:SRS019601_WUGC_scaffold_4587	6720.78	0.998799	1	0.9988
7000000171.a:SRS052697_LANL_scaffold_12111	6505.82	0.654524	0.999955	0.6546
7000000690.a:SRS055982_Baylor_scaffold_15154	6454.02	0.924823	1	0.9248
7000000628.a:SRS015782_WUGC_scaffold_27732	5816	0.481584	1	0.4816
7000000142.a:SRS016753_Baylor_scaffold_16040	5592.34	1	1	1
3300003140.a:Ga0051081_1002036	5250.99	0.837383	1	0.8374
7000000308.a:SRS058770_LANL_scaffold_32137	5244	0.930698	1	0.9307
7000000333.a:SRS050925_LANL_scaffold_16337	5240.72	0.997594	1	0.9976
7000000333.a:SRS050925_LANL_scaffold_51739	5162.64	0.507817	1	0.5078
7000000444.a:SRS063985_LANL_scaffold_25380	4917.08	0.9999	1	0.9999
3300003155.a:Ga0052270_10307189	4774	0.918301	0.999999	0.9183
7000000516.a:SRS019161_WUGC_scaffold_66992	4767.59	0.947592	1	0.9476
7000000646.a:SRS015960_WUGC_scaffold_3189	4752.79	0.988392	1	0.9884
7000000546.a:SRS019910_WUGC_scaffold_48843	4724.04	0.943023	1	0.943
[truncated: 1,852 more rows]

## Sheet: 5.Recipient1-preFMT
#IMG/VR-ID	EstimatedAbundance	Support, Co	PredictedSupport, Ce	Ratio, R
[truncated: 591 more rows]

[truncated: 5 more sheets: 6.Recipient1-post4wkFMT, 7.Recipient1-post8wkFMT, 8.Recipient2-preFMT, 9.Recipient2-post4wkFMT, 10.Recipient2-post8wkFMT]
